# Supplementary material for: Iodine-mediated, chalcogen–chalcogen bond formation in water: green synthesis of carbamo(dithioperoxo)thioates, carbamo(selenothioperoxo)thioates, carbono(dithioperoxo)thioates, and carbono(selenothioperoxo)thioates
Source: Royal Society of Chemistry journal article supplement (doi:10.1039/d4gc04699d), 2024-12-11
Supplement: d4gc04699d1.pdf [file d4gc04699d1.pdf]

## Electronic Supplementary Information (ESI)

### **Iodine-mediated, chalcogen-chalcogen bond formation in water: Green synthesis of carbamo(dithioperoxo)thioates, carbamo(selenothioperoxo)thioates, carbamo(carbono(dithioperoxo)thioates, and carbamo(carbono(selenothioperoxo)thioates**

Appanapalli N. V. Satyanarayana, Paramita Pattanayak, Pranav Pramod Nayar, and Tanmay Chatterjee\*

*Department of Chemistry, Birla Institute of Technology and Science, Pilani, Hyderabad Campus, Jawahar Nagar, Hyderabad – 500078, India.*

*E-mail: [tanmay@hyderabad.bits-pilani.ac.in](mailto:tanmay@hyderabad.bits-pilani.ac.in)*

### Table of Contents

|                                                                                                                                                                     |     |
|---------------------------------------------------------------------------------------------------------------------------------------------------------------------|-----|
| 1. General consideration.....                                                                                                                                       | S2  |
| 1.1 General reagent information .....                                                                                                                               | S2  |
| 1.2 General analytical information .....                                                                                                                            | S2  |
| 2. General experimental procedure for the synthesis of carbamo(dithioperoxo)thioates and carbamo(selenothioperoxo)thioates derivatives (3aa – 3af) .....            | S2  |
| 4. Scale up batch .....                                                                                                                                             | S4  |
| 5. General experimental procedure for the synthesis of sodium piperidine-1-carbodithioate (5).....                                                                  | S4  |
| 6. General experimental procedure for the synthesis of General experimental procedure for the synthesis of piperidine-1-carbothioic dithioperoxyanhydride (6) ..... | S5  |
| 7. General experimental procedure for the synthesis of General experimental procedure for the synthesis of diethyl dithiobis(thionoformate) (7).....                | S5  |
| 8. Evaluation of E- factor for compound 3ac .....                                                                                                                   | S6  |
| 9. Characteristic <sup>13</sup> C NMR signals of piperidine ring and plausible explanation .....                                                                    | S7  |
| 10. Analytical data of the synthesized products.....                                                                                                                | S8  |
| 11. References .....                                                                                                                                                | S13 |
| 12. <sup>1</sup> H, <sup>13</sup> C, <sup>19</sup> F, <sup>77</sup> Se NMR spectra.....                                                                             | S14 |

## 1. General consideration

### 1.1 General reagent information

All reagents were purchased from BLD pharma, TCI chemicals, Sigma-Aldrich, AVRA, and SRL chemicals and used as such. Flash chromatography was performed using silica gel (100-200 mash).

### 1.2 General analytical information

All reagents were purchased from Spectrochem, Avra, BLD, and TCI chemicals. Potassium xanthate was prepared by following a literature protocol.<sup>1</sup> The products were characterized by <sup>1</sup>H, <sup>13</sup>C NMR spectra recorded on a Bruker 400 MHz instrument (400 MHz for <sup>1</sup>H NMR, 100 MHz for <sup>13</sup>C NMR). Copies of <sup>1</sup>H, and <sup>13</sup>C NMR spectra can be found at the end of the Supporting Information. <sup>1</sup>H NMR experiments are reported in units, parts per million (ppm), and were measured relative to residual chloroform (7.26 ppm) or DMSO (2.5 ppm) in the deuterated solvent. <sup>13</sup>C NMR spectra were reported in ppm relative to deuteriochloroform (77.00 ppm) or DMSO-d<sub>6</sub> (40 ppm) and all were obtained with <sup>1</sup>H decoupling. Coupling constants were reported in Hz. Reactions were monitored by thin layer chromatography (TLC) and <sup>1</sup>H NMR of the crude reaction mixture using 1,3,5-trimethoxybenzene as the internal standard. Mass spectral data of unknown compounds were obtained on a high-resolution mass spectrometer, HRMS (6546 Q-TOF LC/MS, Agilent). Melting points of unknown compounds were recorded on a KRUSS Optronic M3000 apparatus.

## 2. General experimental procedure for the synthesis of carbamo(dithioperoxo)thioates and carbamo(selenothioperoxo)thioates derivatives (**3aa – 3af**)

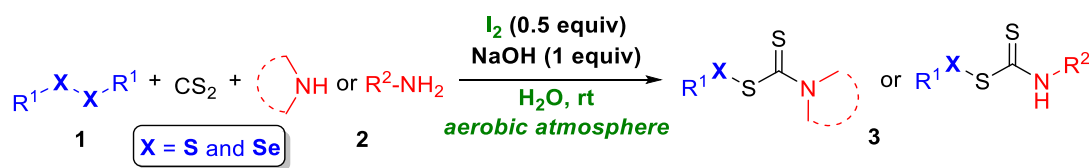

**Representative experimental procedure for the synthesis of propyl piperidine-1-carbo(dithioperoxo)thioate (3aa):** In a round-bottomed flask (RBF), piperidine (0.085 g, 1 mmol, 1 equiv) and NaOH (0.04 g, 1 mmol, 1 equiv) were dissolved in water (2.5 mL), and then CS<sub>2</sub> (0.115 g, 1.5 mmol, 1.5 equiv) was added to the RBF at 0 °C and then the reaction mixture was stirred for 5 min (Solution A). In another 5 mL RBF, 1,2-dipropyldisulfane (0.150 g, 1 mmol, 1 equiv), crushed I<sub>2</sub> (0.127 g, 0.5 mmol, 0.5 equiv) were taken in H<sub>2</sub>O (0.5 mL) and then solution A (aqueous solution of sodium piperidine-1-carbodithioate) was added dropwise over 15 min. The reaction mixture was stirred at room temperature for 30 min. The progress of the reaction was monitored by TLC. After the completion of the reaction, ethyl acetate (30 mL) was added to the reaction mixture and organic compounds were extracted and washed with water. The organic layer

was dried using anhydrous sodium sulfate and then the solvent was evaporated under reduced pressure. The crude product was purified by flash chromatography using 100-200 silica gel and 0-5% EtOAc in hexane as eluent to afford the pure propyl piperidine-1-carbo(dithioperoxo)thioate (**3aa**) (0.202 g, 0.858 mmol) as the yellow liquid in 86% yield. For the synthesis of **3ea**, **3fa**, **3ga**, **3ha**, **3ia**, **3ja**, **3ka**, **3la**, **3fc**, and **3ed** synthesis, the mixture of iodine and disulfide was heated at 60 °C and then solution A (aqueous solution of sodium piperidine-1-carbodithioate) was added dropwise over 15 min. For the synthesis of **3oa** and **3od**, a mixture of THF and water (2:1) was used as a solvent.

### 3. General experimental procedure for the synthesis of carbonyl(dithioperoxo)thioates, and carbonyl(selenothioperoxo)thioates (**4a – 4f**)

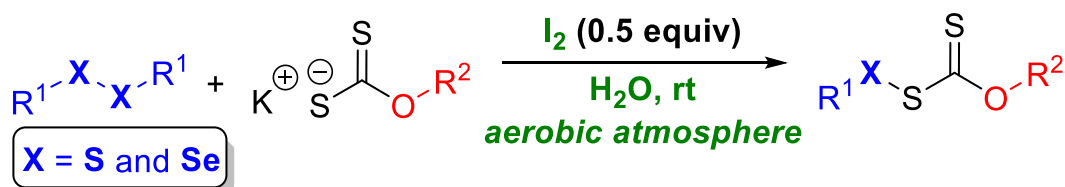

#### Representative experimental procedure for the synthesis of *O*-ethyl *SS*-propyl carbonyl(dithioperoxo)thioate (**4b**):

In a round-bottomed flask (RBF), 1,2-dipropyldisulfane (0.150 g, 1 mmol, 1 equiv), crushed I<sub>2</sub> (0.127 g, 0.5 mmol, 0.5 equiv) were dissolved in H<sub>2</sub>O (0.5 mL) to form (solution A). In another 5 mL RBF potassium ethylxanthate (0.161 g, 1 mmol, 1 equiv) was dissolved in 2.5 mL water (solution B). solution B (aqueous solution of potassium ethylxanthate) was added to the solution A dropwise over 15 min. The reaction mixture was stirred at room temperature for 30 min. The progress of the reaction was monitored by TLC. After completion of the reaction, ethyl acetate (30 mL) was added to the reaction mixture and organic compounds were extracted and washed with water. The organic layer was dried using anhydrous sodium sulfate and then the solvent was evaporated under reduced pressure. The crude product was purified by flash chromatography using 100-200 silica gel and hexane used as an eluent to afford the pure *O*-ethyl *SS*-propyl carbonyl(dithioperoxo)thioate (**4b**) (0.120 g, 0.896 mmol) as a yellow liquid in 61% yield.

#### 4. Scale up batch

Representative experimental procedure for the synthesis of *p*-tolyl pyrrolidine-1-carbo(dithioperoxo)thioate (**3fc**):

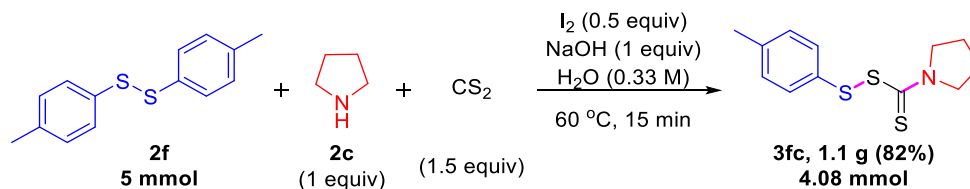

In a round-bottomed flask (RBF), pyrrolidine (**2c**) (0.351 g, 5 mmol, 1 equiv) and NaOH (0.2 g, 1 equiv) were dissolved in water (3 mL), and then  $\text{CS}_2$  (0.571 g, 7.5 mmol, 1.5 equiv) was added to the RBF at 0 °C and then the reaction mixture was stirred for 5 min to form a solution A (aqueous solution of sodium piperidine-1-carbodithioate). In another 10 mL RBF, 1,2-di-*p*-tolyl disulfane (**2f**) (1.23 g, 5 mmol, 1 equiv), crushed  $\text{I}_2$  (0.635 g, 2.5 mmol, 0.5 equiv) were taken in  $\text{H}_2\text{O}$  (12 mL), heated the reaction mixture to 60 °C to form solution B and then solution A (aqueous solution of sodium piperidine-1-carbodithioate) was added to solution B dropwise over 15 min at the same temperature. The reaction mixture was immediately cooled to room temperature and stirred for 15 min. Progress of the reaction was monitored by TLC. After the completion of the reaction, ethyl acetate (30 mL) was added to the reaction mixture and organic compounds were extracted and washed with water. The organic layer was dried using anhydrous sodium sulfate and then the solvent was evaporated under reduced pressure. The crude product was purified by flash chromatography using 100-200 silica gel and 0-3% EtOAc in hexane as an eluent to afford the pure *p*-tolyl pyrrolidine-1-carbo(dithioperoxo)thioate (**3fc**) (1.1 g, 4.08 mmol) as a yellow liquid in 82% yield.

#### 5. General experimental procedure for the synthesis of sodium piperidine-1-carbodithioate (**5**)

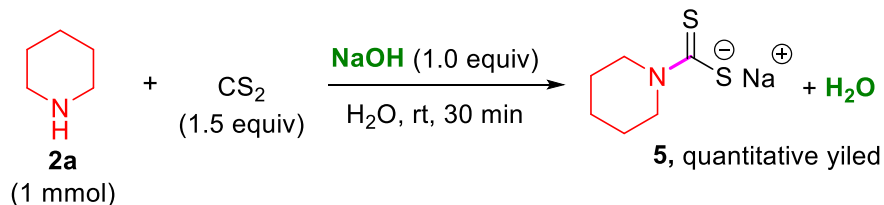

In a round-bottomed flask (RBF), piperidine (0.425 g, 5 mmol, 1 equiv) and  $\text{CS}_2$  (0.571 g, 7.5 mmol, 1.5 equiv) were dissolved in THF (5 mL), and then 0.2 mL aqueous solution of NaOH (0.2 g, 1 equiv) was added to the RBF at 0 °C and then the reaction mixture was stirred for 10 min and filtered the solid and dried to furnish sodium piperidine-1-carbodithioate (**5**) in quantitative yield as a white solid.

**6. General experimental procedure for the synthesis of General experimental procedure for the synthesis of piperidine-1-carbothioic dithioperoxyanhydride (6)**

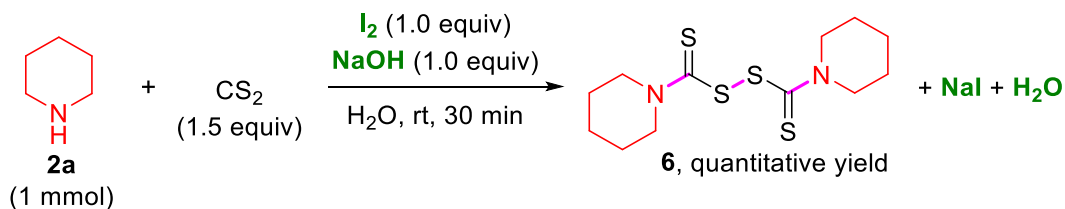

In a round-bottomed flask (RBF), sodium piperidine-1-carbodithioate (**5**) (0.184 g, 1 mmol) was dissolved in water (5 mL), and then crushed  $\text{I}_2$  (0.254 g, 1 equiv) was added to the RBF at room temperature. The reaction mixture was stirred for 30 min at room temperature. After completion of the reaction, ethyl acetate (30 mL) was added to the reaction mixture and organic compounds were extracted and washed with water. The organic layer was dried using anhydrous sodium sulfate and then the solvent was evaporated under reduced pressure to afford piperidine-1-carbothioic dithioperoxyanhydride (**6**) in quantitative yield as a light yellow solid.

**7. General experimental procedure for the synthesis of General experimental procedure for the synthesis of diethyl dithiobis(thionoformate) (7)**

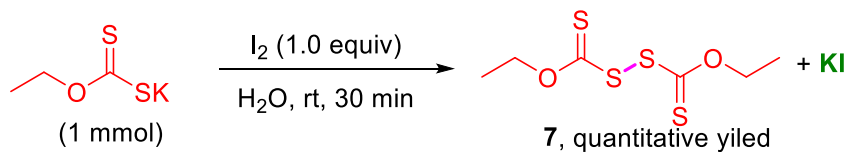

In a round-bottomed flask (RBF), potassium *O*-ethyl carbonodithioate (0.161 g, 1 mmol) was dissolved in water (5 mL), and then crushed  $\text{I}_2$  (0.254 g, 1 equiv) was added to the RBF at room temperature. The reaction mixture was stirred for 30 min at room temperature. After completion of the reaction, ethyl acetate (30 mL) was added to the reaction mixture and organic compounds were extracted and washed with water. The organic layer was dried using anhydrous sodium sulfate and then the solvent was evaporated under reduced pressure to afford piperidine-1-carbothioic dithioperoxyanhydride (**7**) in quantitative yield as a yellow liquid.

## 8. Evaluation of E-factor for compound 3ac

Table S1: Evaluation of E-factor of our protocol for the synthesis of propyl pyrrolidine-1-carbo(dithioperoxo)thioate **3ac**:

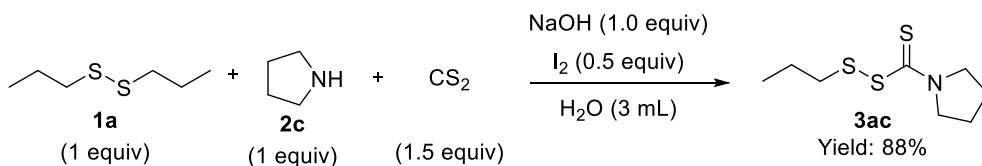

|             |                                                       |          |           |           |
|-------------|-------------------------------------------------------|----------|-----------|-----------|
| Reactant 1: | 1,2-dipropyldisulfane (1a)                            | 0.150 g  | 1 mmol    | FW 150.3  |
| Reactant 2: | pyrrolidine (2c)                                      | 0.0711 g | 1 mmol    | FW 71.12  |
| Reactant 3: | carbon disulfide (CS <sub>2</sub> )                   | 0.114 g  | 1.5 mmol  | FW 76.13  |
| Reactant 4: | sodium hydroxide (NaOH)                               | 0.04 g   | 1 mmol    | FW 40     |
| Reactant 5: | iodine (I <sub>2</sub> )                              | 0.127 g  | 0.5 mmol  | FW 253.81 |
| Solvent     | water (H <sub>2</sub> O)                              | 3.0 g    | --        | FW 18     |
| Product:    | propyl pyrrolidine-1-carbo(dithioperoxo)thioate (3ac) | 0.195 g  | 0.88 mmol | FW 221.4  |

**Consider water as a waste**

$$\text{E-factor} = \frac{\text{total waste (g)}}{\text{total product (g)}} = \frac{(0.15 + 0.071 + 0.114 + 0.04 + 0.127 + 3) - 0.195}{0.195} = \mathbf{16.96} \text{ g waste/g pdt}$$

**Not considering water as a waste**

$$\text{E-factor} = \frac{\text{total waste (g)}}{\text{total product (g)}} = \frac{(0.15 + 0.071 + 0.114 + 0.04 + 0.127) - 0.195}{0.195} = \mathbf{1.57} \text{ g waste/g pdt}$$

Table S2: Evaluation of E-factor for recent literature (Green Chem., 2022, 24, 7362–7367) on the similar transformation, *i.e.*, for the synthesis of propyl pyrrolidine-1-carbo(dithioperoxo)thioate:

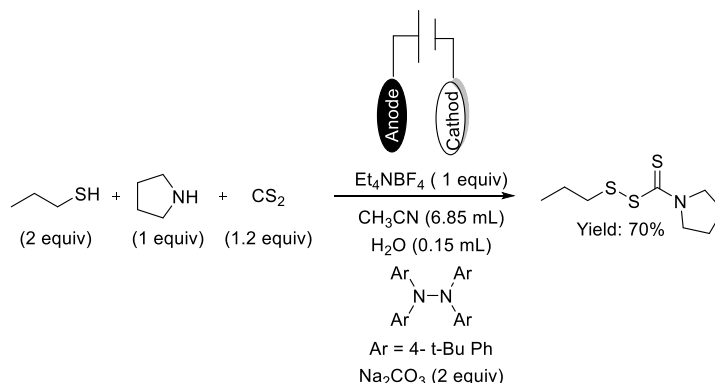

|             |                                                                   |          |            |           |
|-------------|-------------------------------------------------------------------|----------|------------|-----------|
| Reactant 1: | propane-1-thiol                                                   | 0.0457 g | 0.60 mmol  | FW 76.16  |
| Reactant 2: | pyrrolidine                                                       | 0.0213 g | 0.3 mmol   | FW 71.12  |
| Reactant 3: | carbon disulfide                                                  | 0.0274 g | 0.36 mmol  | FW 76.13  |
| Reactant 4: | sodium carbonate                                                  | 0.0636 g | 0.60 mmol  | FW 105.99 |
| Catalyst    | 1,1,2,2-tetrakis(4-( <i>tert</i> -butyl)phenyl)hydrazine          | 0.0336 g | 0.02 mmol  | FW 560.87 |
| Electrolyte | (C <sub>2</sub> H <sub>5</sub> ) <sub>4</sub> N(BF <sub>4</sub> ) | 0.0651 g | 0.3 mmol   | FW 217.16 |
| Solvent 1   | acetonitrile                                                      | 5.38 g   | --         | FW 41.05  |
| Solvent 2   | water                                                             | 0.15 g   | --         | FW 18     |
| -----       |                                                                   |          |            |           |
| Product:    | propyl pyrrolidine-1-carbo(dithioperoxo)thioate                   | 0.047 g  | 0.209 mmol | FW 221.4  |

**Considering water as a waste**

$$\text{E-factor} = \frac{\text{total waste (g)}}{\text{total product (g)}} = \frac{(0.046 + 0.021 + 0.027 + 0.064 + 0.034 + 0.065 + 5.38 + 0.15) - 0.047}{0.047} = \mathbf{122.13} \text{ g waste/g pdt}$$

**Not considering water as a waste**

$$\text{E-factor} = \frac{\text{total waste (g)}}{\text{total product (g)}} = \frac{(0.046 + 0.021 + 0.027 + 0.064 + 0.034 + 0.065 + 5.38) - 0.047}{0.047} = \mathbf{118.94} \text{ g waste/g pdt}$$

**Not considering solvents (CH<sub>3</sub>CN and H<sub>2</sub>O) as a waste**

$$\text{E-factor} = \frac{\text{total waste (g)}}{\text{total product (g)}} = \frac{(0.046 + 0.021 + 0.027 + 0.064 + 0.034 + 0.065) - 0.047}{0.047} = \mathbf{4.47} \text{ g waste/g pdt}$$

## 9. Characteristic <sup>13</sup>C NMR signals of piperidine ring and a plausible explanation

1. The nature of the <sup>13</sup>C peaks from the piperidine ring was found unique. The α-carbons and the β-carbons of the piperidine ring appeared non-equivalent in the <sup>13</sup>C-spectra, and these <sup>13</sup>C-signals were found to be relatively broad with less intensity as compared to typical aliphatic carbons. Although these peaks are expected to be equivalent and similar in intensity to the typical aliphatic carbons, they appear to display partial double bond character, likely due to hindered rotation causing non-equivalence in the signals.

- The intensity of  $^{13}\text{C}$  NMR signals is dependent on relaxation time T1. Shorter relaxation times lead to shorter NMR signals. In piperidine, carbon attached to nitrogen might have shorter relaxation times, due to increased interaction with nearby nuclei.
- The symmetry of piperidine causes multiple overlapping signals in its  $^{13}\text{C}$  NMR spectra, particularly if it is the simple, unsubstituted form. Sometimes the signals appear less intense when peaks overlap or are closely spaced.

## 10. Analytical data of the synthesized products

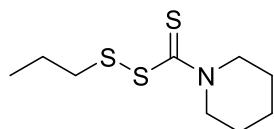

**Propyl piperidine-1-carbo(dithioperoxo)thioate (3aa)<sup>2</sup>**: yellow gummy (0.202 g, 86%);  $^1\text{H}$  NMR (400 MHz,  $\text{CDCl}_3$ )  $\delta$  4.26 (br s, 2H), 3.93 (br s, 2H), 2.78 (t,  $J = 7.4$  Hz, 2H), 1.68 (br s, 6H), 1.67 – 1.59 (m, 2H), 0.96 (t,  $J = 7.4$  Hz, 3H);  $^{13}\text{C}$  NMR (100 MHz,  $\text{CDCl}_3$ )  $\delta$  196.0, 55.0, 51.7, 40.5, 26.0, 25.3, 24.0, 21.7, 13.0; HRMS (ESI)  $m/z$  calcd for  $\text{C}_9\text{H}_{18}\text{NS}_3$   $[\text{M}+\text{H}]^+$ : 236.0601; found: 236.0603.

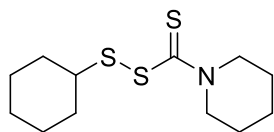

**Cyclohexyl piperidine-1-carbo(dithioperoxo)thioate (3ba)**: yellow liquid (0.183 g, 66%);  $^1\text{H}$  NMR (400 MHz,  $\text{CDCl}_3$ )  $\delta$  4.27 (br s, 2H), 3.99 (br s, 2H), 2.99 (tt,  $J = 10.6, 3.7$  Hz, 1H), 2.18 – 1.91 (m, 2H), 1.83 – 1.51 (m, 9H), 1.47 – 1.09 (m, 5H);  $^{13}\text{C}$  NMR (100 MHz,  $\text{CDCl}_3$ )  $\delta$  196.9, 55.2, 51.8, 49.2, 32.8, 32.6, 32.2, 26.1, 25.9, 25.7, 25.6, 24.1; HRMS (ESI)  $m/z$  calcd for  $\text{C}_{12}\text{H}_{22}\text{NS}_3$   $[\text{M}+\text{H}]^+$ : 276.0914; found: 276.0918.

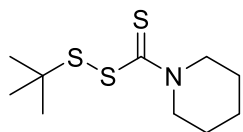

**Tert-butyl piperidine-1-carbo(dithioperoxo)thioate (3ca)<sup>2</sup>**: yellow liquid (0.121 g, 48%);  $^1\text{H}$  NMR (400 MHz,  $\text{DMSO-d}_6$ )  $\delta$  4.33 – 3.80 (m, 4H), 1.77 – 1.54 (m, 6H), 1.44 – 1.22 (m, 9H);  $^{13}\text{C}$  NMR (100 MHz,  $\text{DMSO-d}_6$ )  $\delta$  192.2, 55.6, 52.6, 49.7, 29.9, 26.7, 25.7, 23.9, 23.8; HRMS (ESI)  $m/z$  calcd for  $\text{C}_{10}\text{H}_{20}\text{NS}_3$   $[\text{M}+\text{H}]^+$ : 250.0758; found: 250.0761.

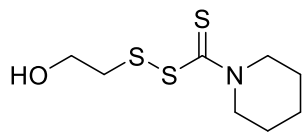

**2-Hydroxyethyl piperidine-1-carbo(dithioperoxo)thioate (3da)<sup>3</sup>**: off-white solid (0.118 g, 50%); melting point: 42- 43 °C;  $^1\text{H}$  NMR (400 MHz,  $\text{CDCl}_3$ )  $\delta$  4.29 (br s, 2H), 3.96 (br s, 2H), 3.68 (t,  $J = 4.0$  Hz, 2H), 2.89 (t,  $J = 4.0$  Hz, 2H), 1.70 (s, 6H).  $^{13}\text{C}$  NMR (100 MHz,  $\text{CDCl}_3$ )  $\delta$  196.7, 58.1, 55.8, 51.9, 43.1, 26.2, 25.3, 23.9.

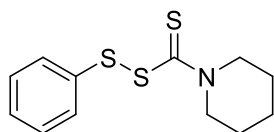

**Phenyl piperidine-1-carbo(dithioperoxo)thioate (3ea)**: off-white solid (0.195 g, 73%); melting point: 91- 93 °C;  $^1\text{H}$  NMR (400 MHz,  $\text{CDCl}_3$ )  $\delta$  7.53 – 7.41 (m, 2H), 7.25 – 7.12 (m, 3H), 4.21 (br s, 2H), 3.91 (br s, 2H), 1.64 (s, 6H).  $^{13}\text{C}$  NMR (100 MHz,  $\text{CDCl}_3$ )  $\delta$  194.3, 136.1, 129.0, 128.8, 127.7, 55.5, 51.9, 26.2, 25.4, 24.0; HRMS (ESI)  $m/z$  calcd for  $\text{C}_{12}\text{H}_{16}\text{NS}_3$   $[\text{M}+\text{H}]^+$ : 270.0445; found: 270.0445.



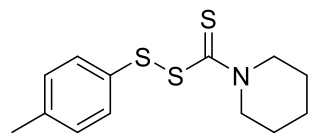

***p*-Tolyl piperidine-1-carbo(dithioperoxo)thioate (3fa):** off-white solid (0.255 g, 90%); melting point: 53- 55 °C; <sup>1</sup>H NMR (400 MHz, DMSO-*d*<sub>6</sub>) δ 7.40 (d, *J* = 8.2 Hz, 2H), 7.19 – 7.11 (m, 2H), 4.22 (s, 2H), 3.98 (br s, 2H), 2.27 (br s, 3H), 1.66 – 1.56 (m, 6H); <sup>13</sup>C NMR (101 MHz, DMSO-*d*<sub>6</sub>) δ 192.6, 138.2, 132.7, 130.2, 129.5, 55.5, 52.2, 26.6, 25.7, 23.8, 21.1; HRMS (ESI) *m/z* calcd for C<sub>13</sub>H<sub>18</sub>NS<sub>3</sub> [M+H]<sup>+</sup>: 284.0601; found: 284.0601.

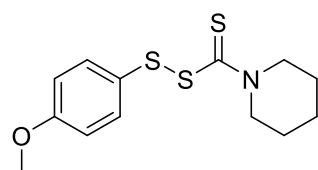

**4-Methoxyphenyl piperidine-1-carbo(dithioperoxo)thioate (3ga):** off-white solid (0.232 g, 77%); melting point: 70- 72 °C; <sup>1</sup>H NMR (400 MHz, CDCl<sub>3</sub>) δ 7.62 (d, *J* = 8.9 Hz, 1H), 6.82 (d, *J* = 8.9 Hz, 1H), 4.28 (s, 1H), 3.94 (s, 1H), 3.86 (s, *J* = 65.1 Hz, 3H), 1.70 (s, 3H). <sup>13</sup>C NMR (100 MHz, CDCl<sub>3</sub>) δ 195.2, 160.3, 133.6, 127.1, 114.5, 55.3, 51.9, 26.1, 25.5, 24.1; HRMS (ESI) *m/z* calcd for C<sub>13</sub>H<sub>18</sub>NOS<sub>3</sub> [M+H]<sup>+</sup>: 300.0551; found: 300.0550.

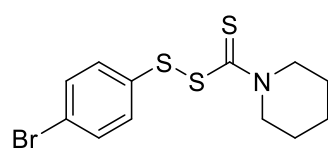

**4-Bromophenyl piperidine-1-carbo(dithioperoxo)thioate (3ha):** white solid (0.225 g, 65%); melting point: 90- 92 °C; <sup>1</sup>H NMR (400 MHz, CDCl<sub>3</sub>) δ 7.44- 7.38 (m, 4H), 4.28 (br s, 2H), 3.98 (br s, 2H), 1.72 (s, 6H). <sup>13</sup>C NMR (100 MHz, CDCl<sub>3</sub>) δ 193.7, 135.4, 132.1, 131.8, 130.8, 129.3, 55.5, 52.0, 26.3, 25.4, 24.0; HRMS (ESI) *m/z* calcd for C<sub>12</sub>H<sub>15</sub>BrNS<sub>3</sub>: [M+H]<sup>+</sup>: 347.9550; found: 347.9549.

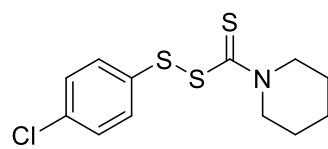

**4-Chlorophenyl piperidine-1-carbo(dithioperoxo)thioate (3ia):** yellow solid (0.218 g, 72%); melting point: 89- 91 °C; <sup>1</sup>H NMR (400 MHz, CDCl<sub>3</sub>) δ 7.42 (d, *J* = 8.7 Hz, 2H), 7.18 (d, *J* = 8.7 Hz, 2H), 4.21 (br s, 2H), 3.9 (br s, 2H), 1.64 (s, 6H). <sup>13</sup>C NMR (101 MHz, CDCl<sub>3</sub>) δ 193.7, 134.7, 133.8, 130.6, 128.9, 55.5, 52.0, 26.2, 25.4, 23.9; HRMS (ESI) *m/z* calcd for C<sub>12</sub>H<sub>15</sub>ClNS<sub>3</sub> [M+H]<sup>+</sup>: 304.0055; found: 304.0055.

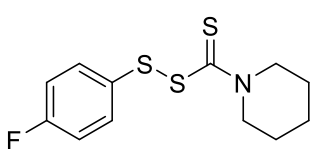

**4-Fluorophenyl piperidine-1-carbo(dithioperoxo)thioate (3ja):** light yellow solid (0.210 g, 73%); melting point: 95- 97 °C; <sup>1</sup>H NMR (400 MHz, CDCl<sub>3</sub>) δ 7.46- 7.42 (m, 2H), 7.13- 7.09 (m, 2H), 4.27 (br s, 2H), 3.98 (br s, 2H), 1.73 (s, 6H); <sup>13</sup>C NMR (100 MHz, CDCl<sub>3</sub>) δ 195.6, 163.8 (d, *J* = 250.8 Hz), 139.1 (d, *J* = 8.7 Hz), 126.9 (d, *J* = 2.7 Hz), 116.1 (d, *J* = 22.1 Hz), 53.3, 51.8, 26.0, 25.2, 24.0; <sup>19</sup>F NMR (377 MHz, CDCl<sub>3</sub>) δ -110.1; HRMS (ESI) *m/z* calcd for C<sub>12</sub>H<sub>15</sub>FNS<sub>3</sub> [M+H]<sup>+</sup>: 288.0351; found: 288.0349.

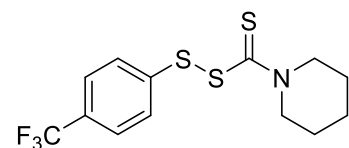

**4-(Trifluoromethyl)phenylpiperidine-1-carbo(dithioperoxo)thioate (3ka):** yellow gummy liquid (0.275 g, 82%); <sup>1</sup>H NMR (400 MHz, CDCl<sub>3</sub>) δ 7.43 (d, *J* = 8.2 Hz, 2H), 7.16 – 7.11 (m, 2H), 4.71 (q, *J* = 7.1 Hz, 2H), 2.34 (s, 3H), 1.47 (t, *J* = 7.1 Hz, 3H); <sup>13</sup>C NMR (100 MHz, CDCl<sub>3</sub>) δ 193.0, 140.9, 129.3 (q, *J* = 32.7 Hz), 125.7, 125.6, 55.7, 52.2, 26.3, 25.5, 24.0; <sup>19</sup>F NMR (377 MHz, CDCl<sub>3</sub>) δ -62.5; HRMS (ESI) *m/z* calcd for C<sub>13</sub>H<sub>15</sub>F<sub>3</sub>NS<sub>3</sub> [M+H]<sup>+</sup>: 338.0319; found: 338.0304.

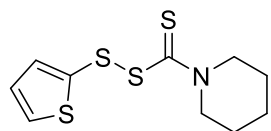

**Thiophen-2-yl piperidine-1-carbo(dithioperoxo)thioate (3la):** yellow solid (0.165 g, 60%); melting point: 62- 64 °C;  $^1\text{H NMR}$  (400 MHz,  $\text{CDCl}_3$ )  $\delta$  7.64 (dd,  $J = 5.3, 1.2$  Hz, 1H), 7.27 – 7.23 (m, 1H), 7.14 (dd,  $J = 5.3, 3.6$  Hz, 1H), 4.27 (s, 2H), 3.98 (s, 2H), 1.74 (s, 6H).  $^{13}\text{C NMR}$  (100 MHz,  $\text{CDCl}_3$ )  $\delta$  195.7, 138.9, 133.4, 129.1, 127.8, 53.8, 51.8, 26.2, 25.3, 24.1; HRMS (ESI)  $m/z$  calcd for  $\text{C}_{10}\text{H}_{14}\text{NS}_4$   $[\text{M}+\text{H}]^+$ : 276.0009; found: 276.0007.

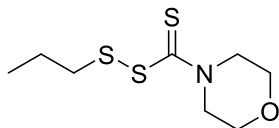

**Propyl morpholine-4-carbo(dithioperoxo)thioate (3ab):** off-white solid (0.166 g, 70%); melting point: 82- 84 °C;  $^1\text{H NMR}$  (400 MHz,  $\text{DMSO-d}_6$ )  $\delta$  4.14 (d,  $J = 77.4$  Hz, 4H), 3.70 (s, 4H), 2.80 (t,  $J = 7.1$  Hz, 2H), 1.70 – 1.52 (m, 2H), 0.95 (t,  $J = 7.3$  Hz, 3H);  $^{13}\text{C NMR}$  (100 MHz,  $\text{DMSO-d}_6$ )  $\delta$  196.1, 66.1, 53.7, 51.3, 40.2, 21.9, 13.3; HRMS (ESI)  $m/z$  calcd for  $\text{C}_8\text{H}_{16}\text{NOS}_3$   $[\text{M}+\text{H}]^+$ : 238.0394; found: 238.0396.

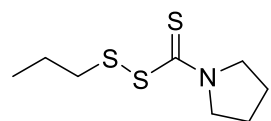

**Propyl pyrrolidine-1-carbo(dithioperoxo)thioate (3ac)<sup>2</sup>:** yellow liquid (0.195 g, 88%);  $^1\text{H NMR}$  (400 MHz,  $\text{CDCl}_3$ )  $\delta$  3.94 (t,  $J = 7.0$  Hz, 2H), 3.73 (t,  $J = 6.9$  Hz, 2H), 2.82 (t,  $J = 7.3$  Hz, 2H), 2.14 – 2.06 (m, 2H), 2.01-1.94 (m, 2H), 1.74 – 1.62 (m, 2H), 0.99 (t,  $J = 7.4$  Hz, 3H).  $^{13}\text{C NMR}$  (100 MHz,  $\text{CDCl}_3$ )  $\delta$  192.9, 56.6, 50.5, 40.5, 26.4, 24.1, 21.9, 13.1.

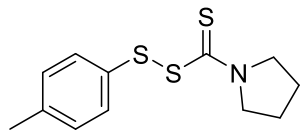

**p-Tolyl pyrrolidine-1-carbo(dithioperoxo)thioate (3fc)<sup>2</sup>:** off-white solid (1.1 g, 82%); melting point: 121- 123 °C;  $^1\text{H NMR}$  (400 MHz,  $\text{CDCl}_3$ )  $\delta$  7.53 (d,  $J = 8.2$  Hz, 2H), 7.10 (d,  $J = 7.9$  Hz, 2H), 3.96 (t,  $J = 7.0$  Hz, 2H), 3.74 (t,  $J = 6.9$  Hz, 2H), 2.31 (s, 3H), 2.17 – 2.05 (m, 2H), 2.06 – 1.91 (m, 2H).  $^{13}\text{C NMR}$  (100 MHz,  $\text{CDCl}_3$ )  $\delta$  191.7, 138.5, 132.7, 130.6, 129.7, 56.8, 50.5, 26.6, 24.1, 21.1; HRMS (ESI)  $m/z$  calcd for  $\text{C}_{12}\text{H}_{16}\text{NS}_3$   $[\text{M}+\text{H}]^+$ : 270.0445; found: 270.0446.

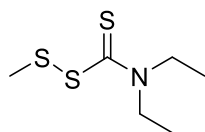

**Methyl diethylcarbam(dithioperoxo)thioate (3md):** yellow liquid (0.101 g, 52%);  $^1\text{H NMR}$  (400 MHz,  $\text{CDCl}_3$ )  $\delta$  4.13 – 3.96 (m, 1H), 3.80-3.75 (m, 1H), 2.48 (s, 1H), 1.33-1.27 (m, 3H).  $^{13}\text{C NMR}$  (100 MHz,  $\text{CDCl}_3$ )  $\delta$  195.5, 51.5, 46.9, 22.9, 13.0, 11.4; HRMS (ESI)  $m/z$  calcd for  $\text{C}_6\text{H}_{14}\text{NS}_3$   $[\text{M}+\text{H}]^+$ : 196.0288; found: 196.0288.

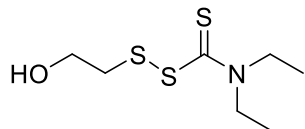

**2-Hydroxyethyl diethylcarbam(dithioperoxo)thioate (3dd)<sup>3</sup>:** yellow liquid (0.118 g, 52%);  $^1\text{H NMR}$  (400 MHz,  $\text{CDCl}_3$ )  $\delta$  4.01 (q,  $J = 7.0$  Hz, 2H), 3.80 (q,  $J = 7.2$  Hz, 2H), 3.67 (t,  $J = 5.2$  Hz, 2H), 3.28 (br s, 1H), 2.87 (t,  $J = 5.2$  Hz, 1H), 1.28 (dt,  $J = 15.9, 7.1$  Hz, 3H);  $^{13}\text{C NMR}$  (100 MHz,  $\text{CDCl}_3$ )  $\delta$  196.7, 58.1, 52.1, 47.1, 43.1, 12.9, 11.2.

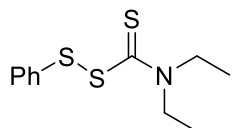

**Phenyl diethylcarbam(dithioperoxo)thioate (3ed):** yellow solid (186 mg, 73%); melting point: 116- 118 °C;  $^1\text{H NMR}$  (400 MHz,  $\text{CDCl}_3$ )  $\delta$  7.60 – 7.50 (m, 2H), 7.38 – 7.17 (m, 3H), 4.06 (q, 2H), 3.84 (q, 1H), 1.37-1.29 (m, 6H).  $^{13}\text{C NMR}$  (100 MHz,  $\text{CDCl}_3$ )  $\delta$  194.3, 136.1, 129.1, 128.9, 127.8, 51.9, 47.0, 13.2, 11.4; HRMS (ESI)  $m/z$  calcd for  $\text{C}_{11}\text{H}_{16}\text{NS}_3$   $[\text{M}+\text{H}]^+$ : 258.0445; found: 258.0448.

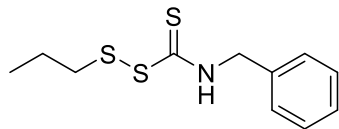

**Propyl benzylcarbamodithioperoxothioate (3ae):** yellow liquid (0.240 g, 94%);  $^1\text{H NMR}$  (400 MHz,  $\text{CDCl}_3$ )  $\delta$  8.78 (s, 1H), 7.50 – 7.31 (m, 5H), 4.94 (d,  $J = 5.4$  Hz, 2H), 2.69 (t,  $J = 7.2$  Hz, 2H), 1.68 – 1.56 (m, 3H), 0.91 (t,  $J = 7.3$  Hz, 3H).  $^{13}\text{C NMR}$  (100 MHz,  $\text{CDCl}_3$ )  $\delta$  191.6, 135.5, 129.0, 128.3, 128.1, 50.2, 41.7, 22.6, 12.9; HRMS (ESI)  $m/z$  calcd for  $\text{C}_{11}\text{H}_{16}\text{NS}_3$   $[\text{M}+\text{H}]^+$ : 258.0445; found: 258.0447.

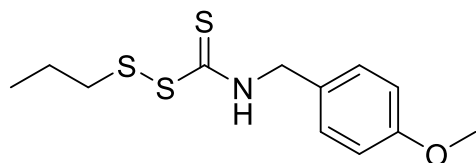

**Propyl 4-methoxybenzylcarbamodithioperoxothioate (3af):** yellow solid (0.205 g, 71%); melting point: 85- 87 °C;  $^1\text{H NMR}$  (400 MHz,  $\text{CDCl}_3$ )  $\delta$  8.70 (s, 1H), 7.28 (d,  $J = 8.8$  Hz, 2H), 6.91 (d,  $J = 8.7$  Hz, 2H), 4.86 (d,  $J = 5.3$  Hz, 2H), 3.82 (s, 3H), 2.67 (t,  $J = 8.0$  Hz, 2H), 1.72 – 1.40 (m, 2H), 0.91 (t,  $J = 7.3$  Hz, 3H);  $^{13}\text{C NMR}$  (100 MHz,  $\text{CDCl}_3$ )  $\delta$  191.2, 159.6, 129.6, 127.4, 114.3, 55.3, 49.7, 41.6, 22.6, 12.9; HRMS (ESI)  $m/z$  calcd for  $\text{C}_{12}\text{H}_{18}\text{NOS}_3$   $[\text{M}+\text{H}]^+$ : 288.0551; found: 288.0474.

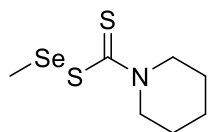

**SSe-Methyl piperidine-1-carbo(selenothioperoxo)thioate (3na):** yellow oil (0.057 g, 45%);  $^1\text{H NMR}$  (400 MHz,  $\text{CDCl}_3$ )  $\delta$  4.29 (br s, 2H), 3.81 (br s, 2H), 2.55 (s, 3H), 1.71 – 1.67 (m, 6H);  $^{13}\text{C NMR}$  (100 MHz,  $\text{CDCl}_3$ )  $\delta$  193.4, 53.5, 53.3, 26.1, 25.3, 24.2, 20.0, 14.8;  $^{77}\text{Se NMR}$  (76 MHz,  $\text{CDCl}_3$ )  $\delta$  483.7; HRMS (ESI)  $m/z$  calcd for  $\text{C}_7\text{H}_{14}\text{NS}_2\text{Se}$   $[\text{M}+\text{H}]^+$ : 255.9733; found: 255.9730.

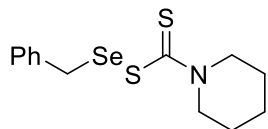

**SSe-Benzyl piperidine-1-carbo(selenothioperoxo)thioate (3oa):** yellow liquid (0.182g, 56%);  $^1\text{H NMR}$  (400 MHz,  $\text{CDCl}_3$ )  $\delta$  7.31 (dd,  $J = 7.7$ , 1.0 Hz, 2H), 7.25 – 7.21 (m, 2H), 7.19 – 7.16 (m, 1H), 4.49 (s, 2H), 4.22 (br s, 2H), 3.78 (br s, 2H), 1.62 (br s, 6H);  $^{13}\text{C NMR}$  (100 MHz,  $\text{CDCl}_3$ )  $\delta$  195.2, 136.0, 129.3, 128.5, 127.4, 52.8, 51.2, 42.2, 25.9, 25.4, 24.2;  $^{77}\text{Se NMR}$  (76 MHz,  $\text{CDCl}_3$ )  $\delta$  383.2; HRMS (ESI)  $m/z$  calcd for  $\text{C}_{13}\text{H}_{18}\text{NS}_2\text{Se}$   $[\text{M}+\text{H}]^+$ : 332.0046; found: 332.0059.

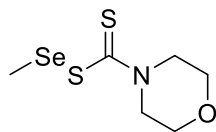

**SSe-Methyl morpholine-4-carbo(selenothioperoxo)thioate (3nb):** yellow liquid (0.154 g, 60%);  $^1\text{H NMR}$  (400 MHz,  $\text{DMSO-d}_6$ )  $\delta$  4.28 - 4.20 (m, 4H), 3.80- 3.72 (m, 4H), 2.55 (s, 3H);  $^{13}\text{C NMR}$  (100 MHz,  $\text{DMSO-d}_6$ )  $\delta$  195.1, 66.3, 66.2, 53.1, 14.6;  $^{77}\text{Se NMR}$  (76 MHz,  $\text{DMSO-d}_6$ )  $\delta$  357.6; HRMS (ESI)  $m/z$  calcd for  $\text{C}_6\text{H}_{12}\text{NOS}_2\text{Se}$   $[\text{M}+\text{H}]^+$ : 257.9526; found: 257.9537.

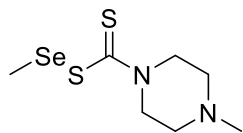

**SSe-Methyl 4-methylpiperazine-1-carbo(selenothioperoxo)thioate (3ng):** yellow liquid (0.178 mg, 67%);  $^1\text{H NMR}$  (400 MHz,  $\text{DMSO-d}_6$ )  $\delta$  4.16 (br s, 4H), 2.49 (s, 3H), 2.45 – 2.38 (m, 4H), 2.22 (s, 3H).  $^{13}\text{C NMR}$  (100 MHz,  $\text{DMSO-d}_6$ )  $\delta$  194.5, 54.6, 52.5, 45.5, 14.6;  $^{77}\text{Se NMR}$  (76 MHz,  $\text{DMSO-d}_6$ )  $\delta$  254.2; HRMS (ESI)  $m/z$  calcd for  $\text{C}_7\text{H}_{15}\text{N}_2\text{S}_2\text{Se}$   $[\text{M}+\text{H}]^+$ : 270.9842; found: 270.9919.

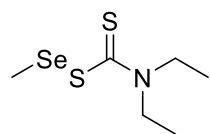

**SSe-Methyl diethylcarbamo(selenothioperoxo)thioate (3nd):** yellow liquid (0.061 g, 50%);  $^1\text{H NMR}$  (400 MHz,  $\text{CDCl}_3$ )  $\delta$  4.04 (dd,  $J = 13.2, 6.3$  Hz, 2H), 3.74 (dd,  $J = 13.9, 6.9$  Hz, 2H), 2.63 (s, 3H), 1.31 – 1.25 (m, 6H);  $^{13}\text{C NMR}$  (100 MHz,  $\text{CDCl}_3$ )  $\delta$  196.8, 49.5, 46.6, 20.0, 12.3, 11.6;  $^{77}\text{Se NMR}$  (76 MHz,  $\text{CDCl}_3$ )  $\delta$  385.2; HRMS (ESI)  $m/z$  calcd for  $\text{C}_6\text{H}_{14}\text{NS}_2\text{Se}$   $[\text{M}+\text{H}]^+$ : 243.9733; found: 243.9732.

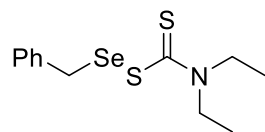

**SSe-Benzyl diethylcarbamo(selenothioperoxo)thioate (3od):** yellow liquid (0.081 g, 51%);  $^{13}\text{C NMR}$  (100 MHz,  $\text{CDCl}_3$ )  $\delta$  195.29, 136.01, 129.4, 129.0, 128.6, 127.5, 49.5, 46.7, 42.3, 12.5, 11.6;  $^{77}\text{Se NMR}$  (76 MHz,  $\text{CDCl}_3$ )  $\delta$  330.5; HRMS (ESI)  $m/z$  calcd for  $\text{C}_{12}\text{H}_{18}\text{NS}_2\text{Se}$   $[\text{M}+\text{H}]^+$ : 320.0046; found: 320.0044.

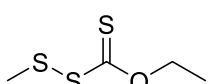

**O-Ethyl SS-methyl carbonyl(dithioperoxo)thioate (4a):** yellow liquid (0.088g, 53%);  $^1\text{H NMR}$  (400 MHz,  $\text{CDCl}_3$ )  $\delta$  4.75 – 4.70 (q,  $J = 8.0$  Hz, 2H), 2.52 (s, 3H), 1.48 (t,  $J = 7.1$  Hz, 3H);  $^{13}\text{C NMR}$  (100 MHz,  $\text{CDCl}_3$ )  $\delta$  212.83, 71.35, 22.78, 13.67; HRMS (ESI)  $m/z$  calcd for  $\text{C}_4\text{H}_9\text{OS}_3$   $[\text{M}+\text{H}]^+$ : 168.9816; found: 168.9814.

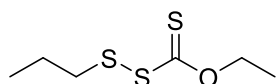

**O-Ethyl SS-propyl carbonyl(dithioperoxo)thioate (4b):** yellow liquid (0.140g, 71%);  $^1\text{H NMR}$  (400 MHz,  $\text{CDCl}_3$ )  $\delta$  4.70 (q,  $J = 7.1$  Hz, 2H), 2.90 – 2.77 (m, 2H), 1.77 – 1.63 (m, 2H), 1.47 (t,  $J = 7.1$  Hz, 3H), 1.00 (t,  $J = 7.3$  Hz, 3H);  $^{13}\text{C NMR}$  (100 MHz,  $\text{CDCl}_3$ )  $\delta$  213.2, 71.2, 41.2, 22.3, 13.6, 13.0; HRMS (ESI)  $m/z$  calcd for  $\text{C}_6\text{H}_{13}\text{OS}_3$   $[\text{M}+\text{H}]^+$ : 197.0129; found: 197.0128.

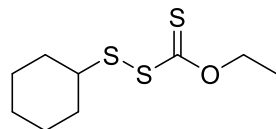

**SS-Cyclohexyl O-ethyl carbonyl(dithioperoxo)thioate (4c):** yellow liquid (0.176 g, 75%);  $^1\text{H NMR}$  (400 MHz,  $\text{CDCl}_3$ )  $\delta$  4.70 (q,  $J = 7.1$  Hz, 2H), 2.90 (tt,  $J = 10.7, 3.7$  Hz, 1H), 2.05 – 1.95 (m, 2H), 1.82 – 1.75 (m, 2H), 1.64 – 1.58 (m, 1H), 1.47 (t,  $J = 7.1$  Hz, 3H), 1.42 – 1.19 (m, 5H);  $^{13}\text{C NMR}$  (100 MHz,  $\text{CDCl}_3$ )  $\delta$  213.6, 71.2, 50.5, 32.7, 25.9, 25.4, 13.6; HRMS (ESI)  $m/z$  calcd for  $\text{C}_9\text{H}_{17}\text{OS}_3$   $[\text{M}+\text{H}]^+$ : 237.0442; found: 237.0443.

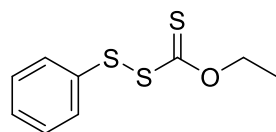

**O-Ethyl SS-phenyl carbonyl(dithioperoxo)thioate (4d):** yellow liquid (0.165 g, 72%);  $^1\text{H NMR}$  (400 MHz,  $\text{CDCl}_3$ )  $\delta$  7.55 – 7.47 (m, 2H), 7.37 – 7.29 (m, 3H), 4.71 (q,  $J = 7.1$  Hz, 2H), 1.45 (t,  $J = 7.1$  Hz, 3H);  $^{13}\text{C NMR}$  (100 MHz,  $\text{CDCl}_3$ )  $\delta$  211.1, 135.9, 131.5, 129.9, 129.1, 128.2, 71.5, 13.6; HRMS (ESI)  $m/z$  calcd for  $\text{C}_9\text{H}_{11}\text{OS}_3$   $[\text{M}+\text{H}]^+$ : 230.9972; found: 230.9972.

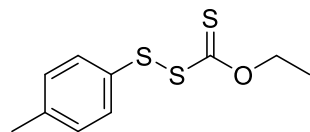

**O-Ethyl SS-p-tolyl carbonyl(dithioperoxo)thioate (4e):** yellow liquid (0.159 g, 65%);  $^1\text{H NMR}$  (400 MHz,  $\text{CDCl}_3$ )  $\delta$  7.43 (d,  $J = 8.2$  Hz, 2H), 7.16 – 7.11 (m, 2H), 4.71 (q,  $J = 7.1$  Hz, 2H), 2.34 (s, 3H), 1.47 (t,  $J = 7.1$  Hz, 3H);  $^{13}\text{C NMR}$  (100 MHz,  $\text{CDCl}_3$ )  $\delta$  211.5, 138.8, 132.4, 132.3, 130.9, 129.9, 71.4, 21.1, 13.6; HRMS (ESI)  $m/z$  calcd for  $\text{C}_{10}\text{H}_{13}\text{OS}_3$   $[\text{M}+\text{H}]^+$ : 245.0129; found: 245.0124.

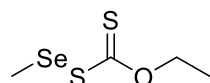

**O-Ethyl SSe-methyl carbonoselenothioperoxothioate (4f):** yellow liquid (0.085 g, 40%);  $^1\text{H}$  NMR (400 MHz,  $\text{CDCl}_3$ )  $\delta$  4.69 (q,  $J = 7.1$  Hz, 2H), 2.56 (s, 3H), 1.48 (t,  $J = 7.1$  Hz, 3H);  $^{13}\text{C}$  NMR (100 MHz,  $\text{CDCl}_3$ )  $\delta$  210.3, 71.8, 71.6, 13.6; NMR (76 MHz,  $\text{CDCl}_3$ )  $\delta$  389.8; HRMS (ESI)  $m/z$  calcd for  $\text{C}_4\text{H}_9\text{OS}_2\text{Se}$   $[\text{M}+\text{H}]^+$ : 216.9260; found: 216.9270.

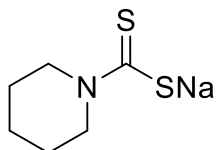

**Sodium piperidine-1-carbodithioate (5)**<sup>4</sup>: white solid (0.183 g, 100%);  $^1\text{H}$  NMR (400 MHz, DMSO)  $\delta$  4.33 – 4.21 (m, 2H), 1.61 – 1.48 (m, 1H), 1.47 – 1.36 (m, 2H).

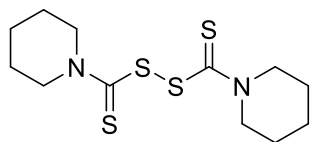

24.1.

**Piperidine-1-carbothioic dithioperoxyanhydride (6)**<sup>5</sup>: light yellow solid (0.317 g, 99%);  $^1\text{H}$  NMR (400 MHz,  $\text{CDCl}_3$ )  $\delta$  4.20 (br s, 8H), 1.73 (br s, 12H);  $^{13}\text{C}$  NMR (100 MHz,  $\text{CDCl}_3$ )  $\delta$  192.6, 55.7, 52.5, 26.3, 25.5,

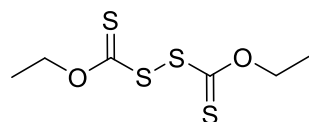

**Diethyl dithiobis(thionoformate) (7)**<sup>6</sup>: yellow gummy oil (0.24 g, 99%)  $^1\text{H}$  NMR (400 MHz,  $\text{CDCl}_3$ )  $\delta$  4.69 (q,  $J = 7.1$  Hz, 2H), 1.42 (t,  $J = 7.1$  Hz, 3H);  $^{13}\text{C}$  NMR (100 MHz,  $\text{CDCl}_3$ )  $\delta$  207.4, 13.6.

## 11. References

1. B. Wang and F. Q. Liu, *RSC Adv.*, 2020, **10**, 28541.
2. Q. Wang, C. H. Xu, Y. C. Wang, Y. M. Pan, W. G. Duan and H. T. Tang, *Green chem.*, 2022, **24**, 7362-7367.
3. V. Cilibrasi, K. Tsang, M. Morelli, F. Solfa, H. L. Wiggins, A. T. Jones, A. D. Westwell, *Tetrahedron Letters*, 2015, **56**, 2583–2585.
4. E. Lieber and R. Orłowski, *J. Org. Chem.*, 1957, **22**, 0022-3263.
5. Y. Xu, Y. Huang, R. Song, Y. Ren, X. Chen, C. Zhang, F. Mao, X. Li, J. Zhu, S. Ni, J. Wan, J. Li, *European Journal of Medicinal Chemistry*, 2020, **203**, 112500.
6. K. Hakobyan, C. S. P. McErlean and M. Mullner, *Macromolecules*, 2020, **53**, 10357–10365.

## 12. $^1\text{H}$ , $^{13}\text{C}$ , $^{19}\text{F}$ , $^{77}\text{Se}$ NMR spectra

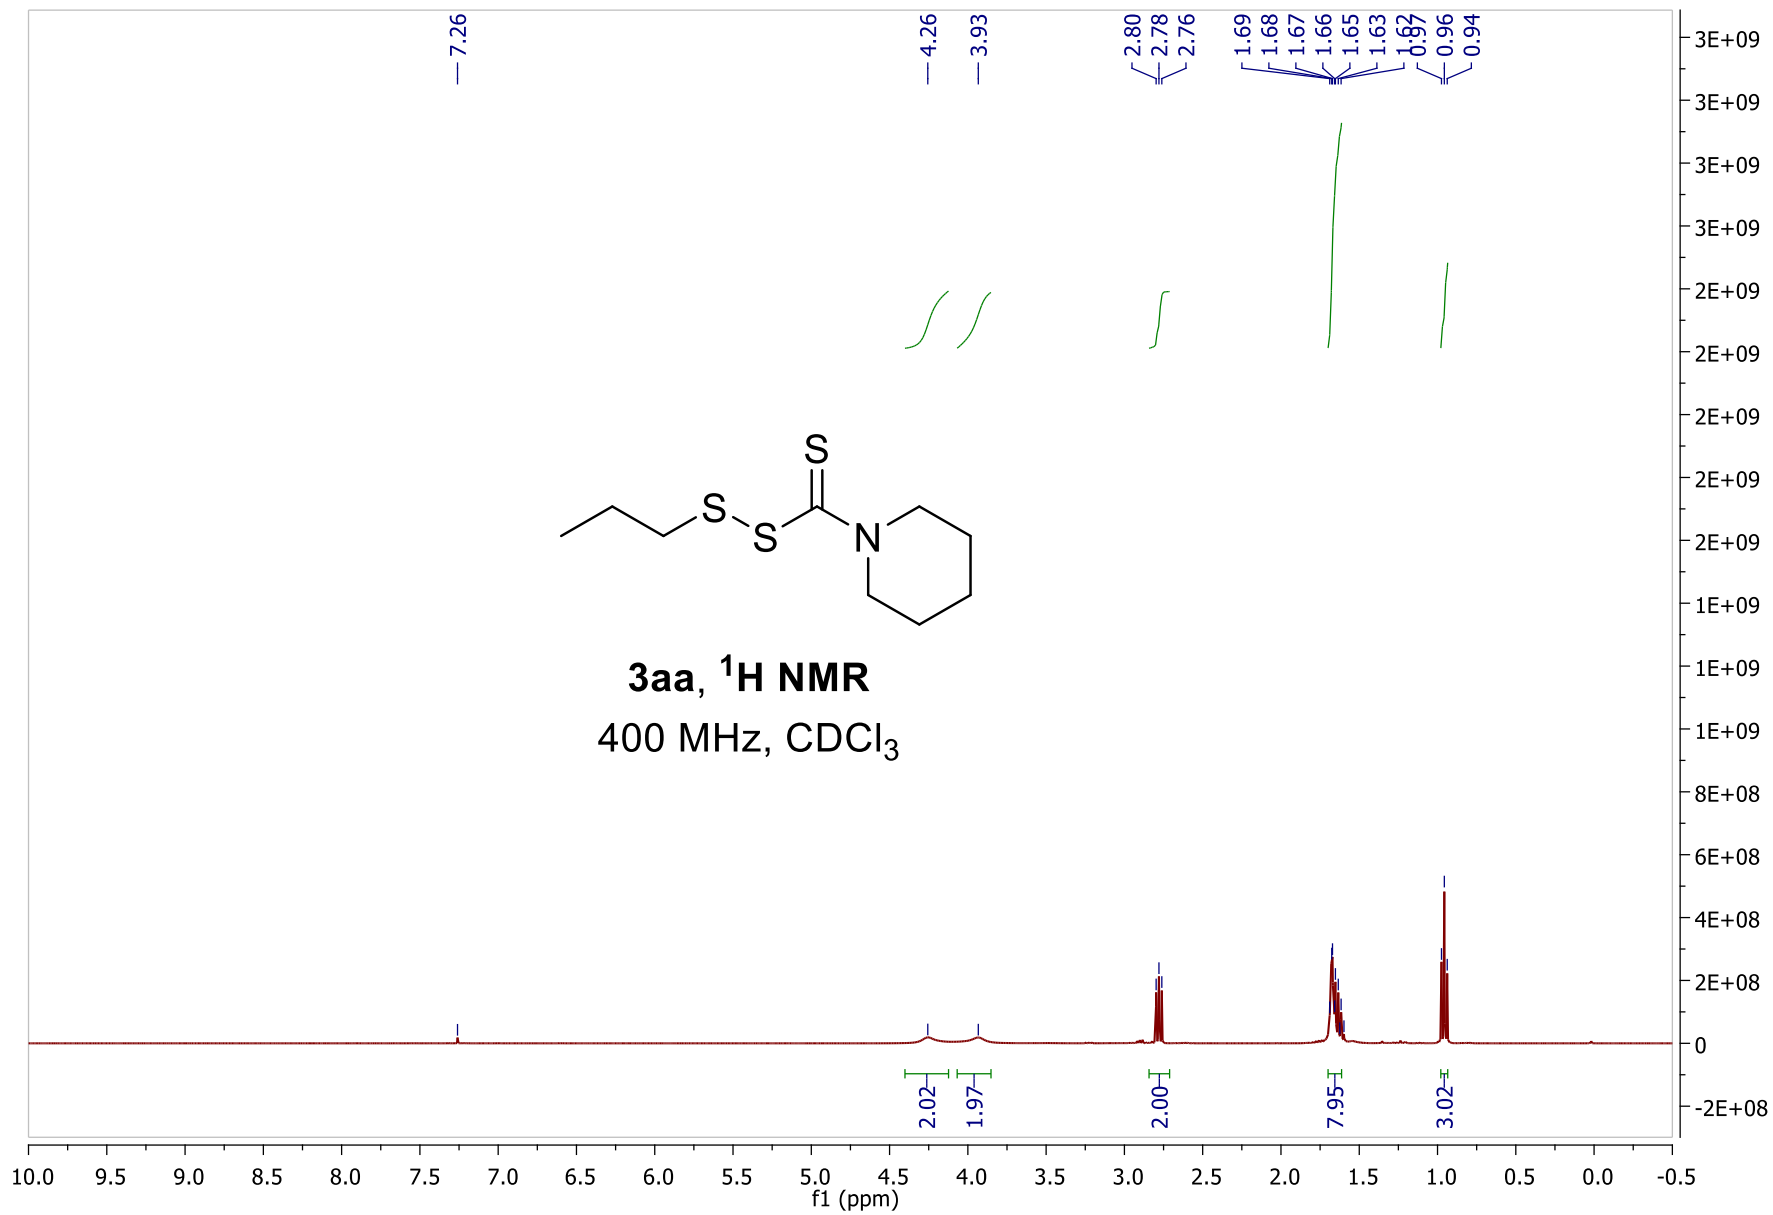

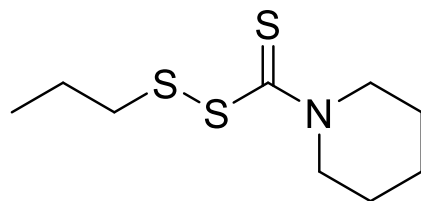

**3aa,  $^{13}\text{C}$  NMR**  
100 MHz,  $\text{CDCl}_3$

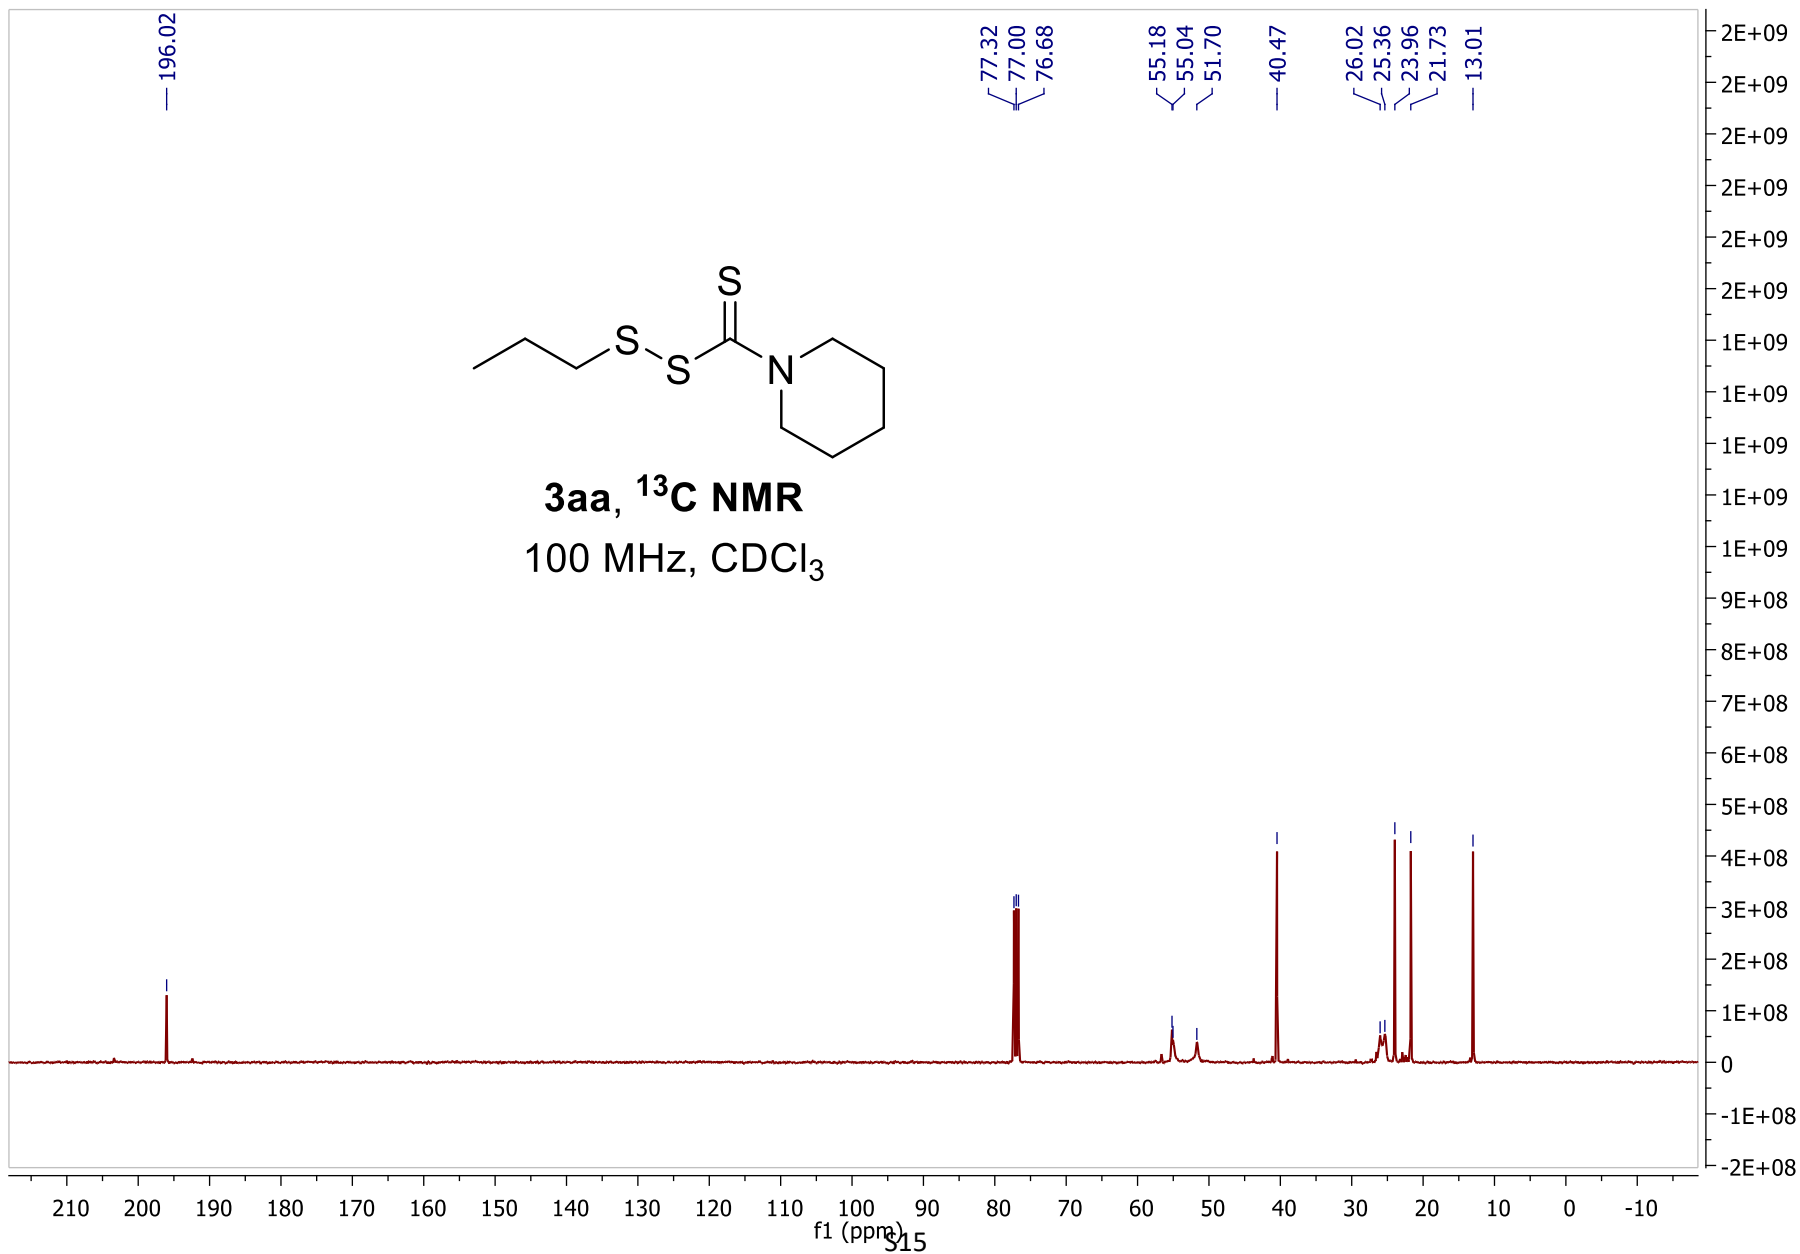

# Spectrum Plot Report

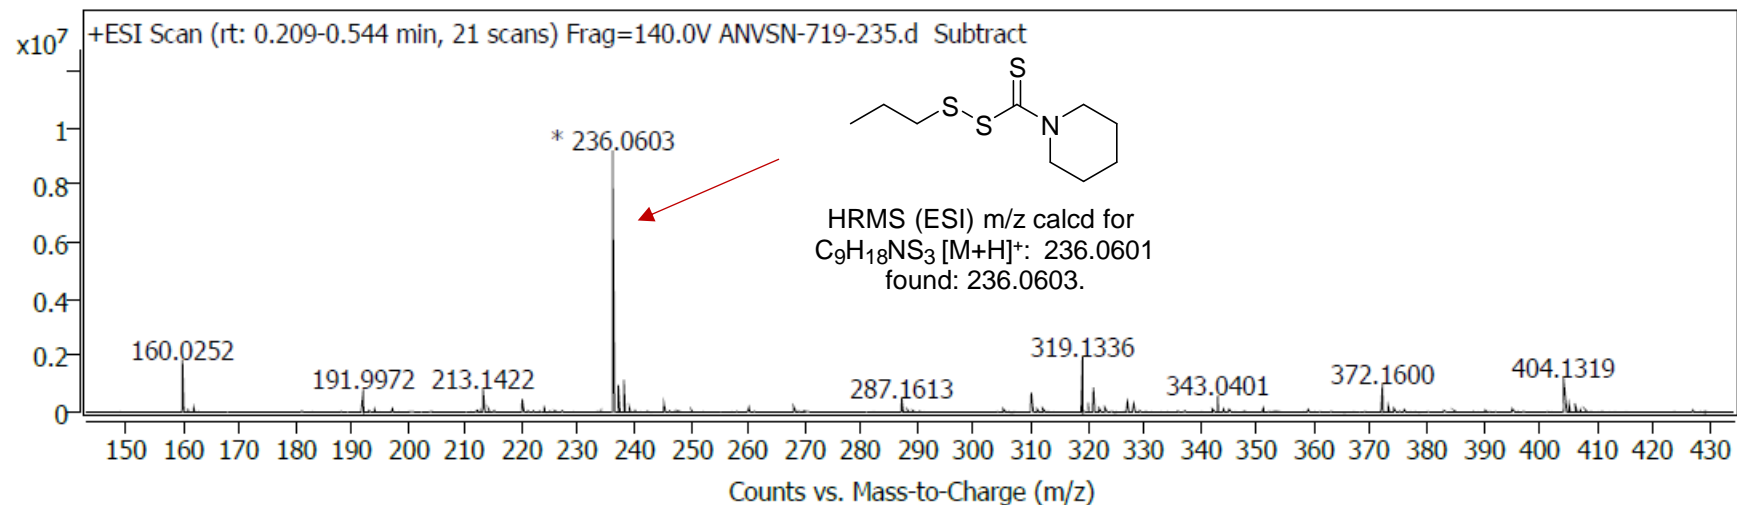



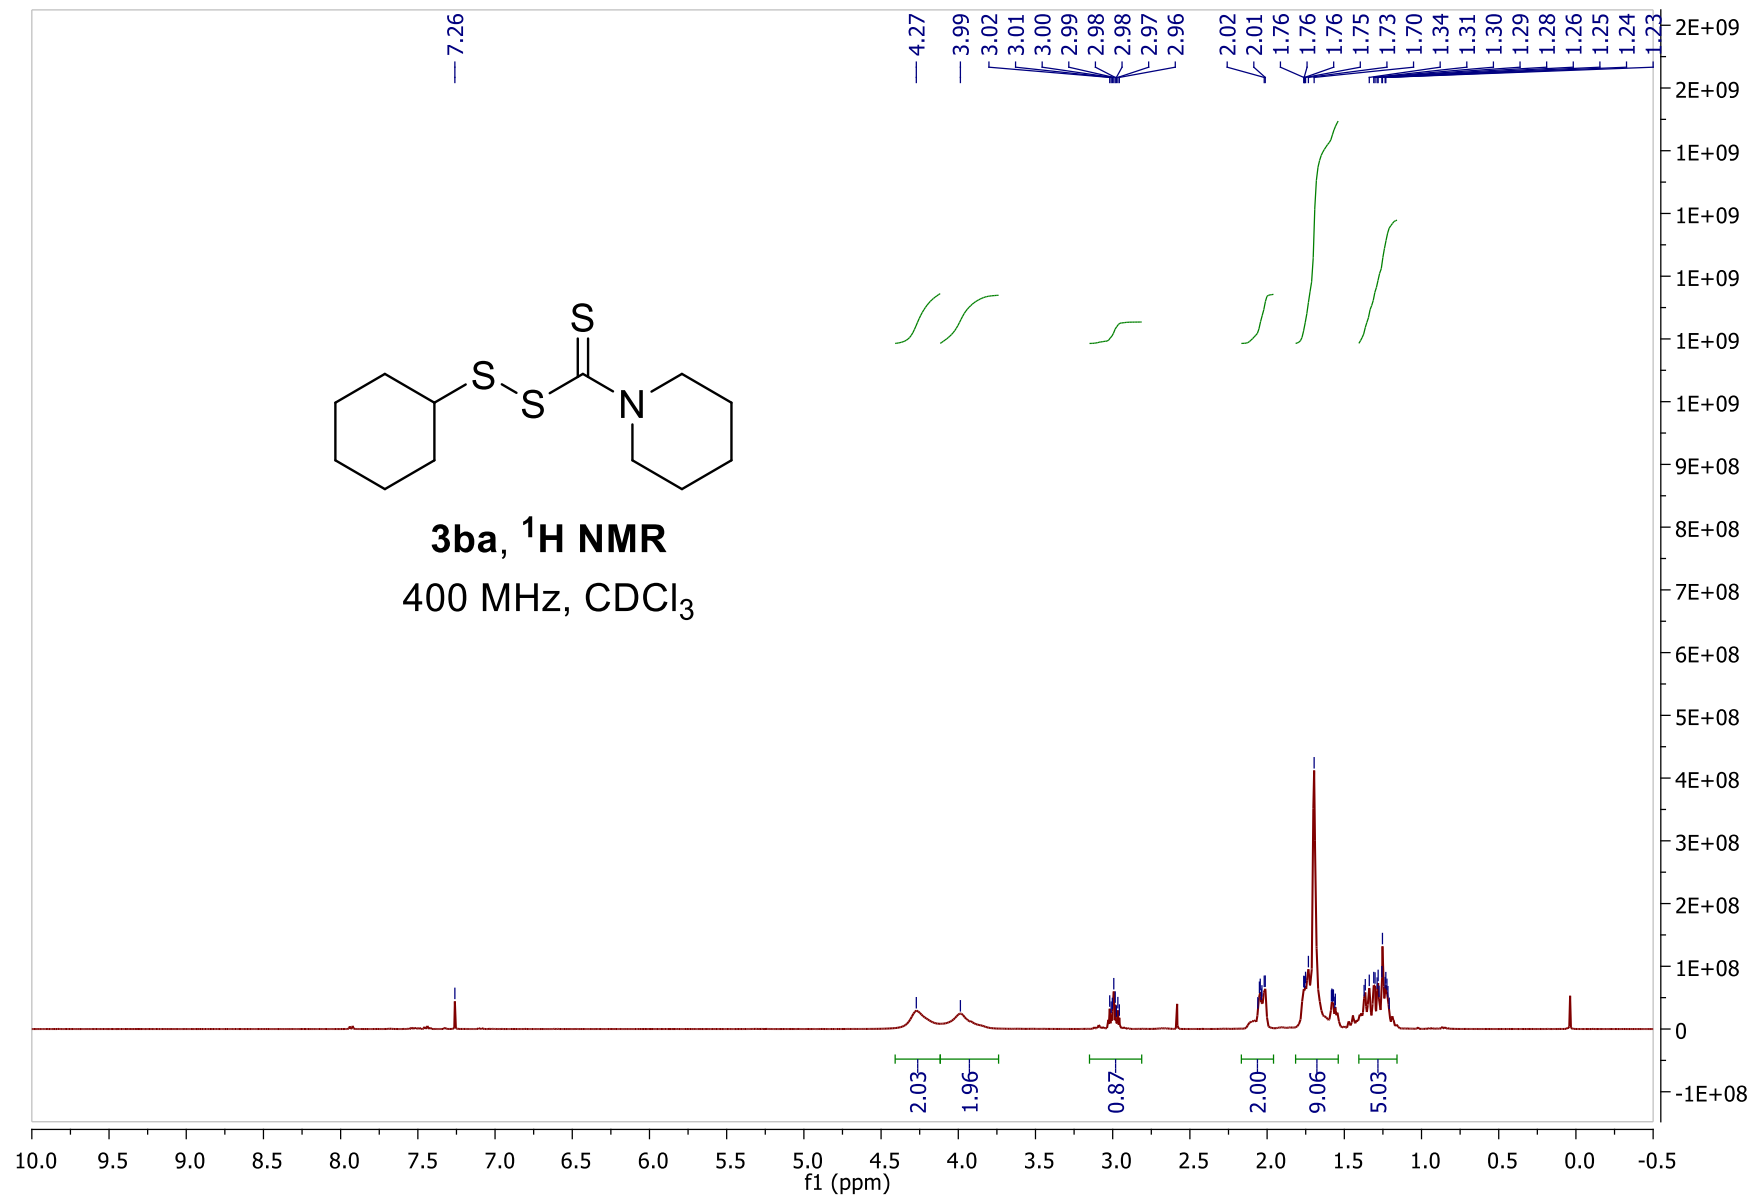

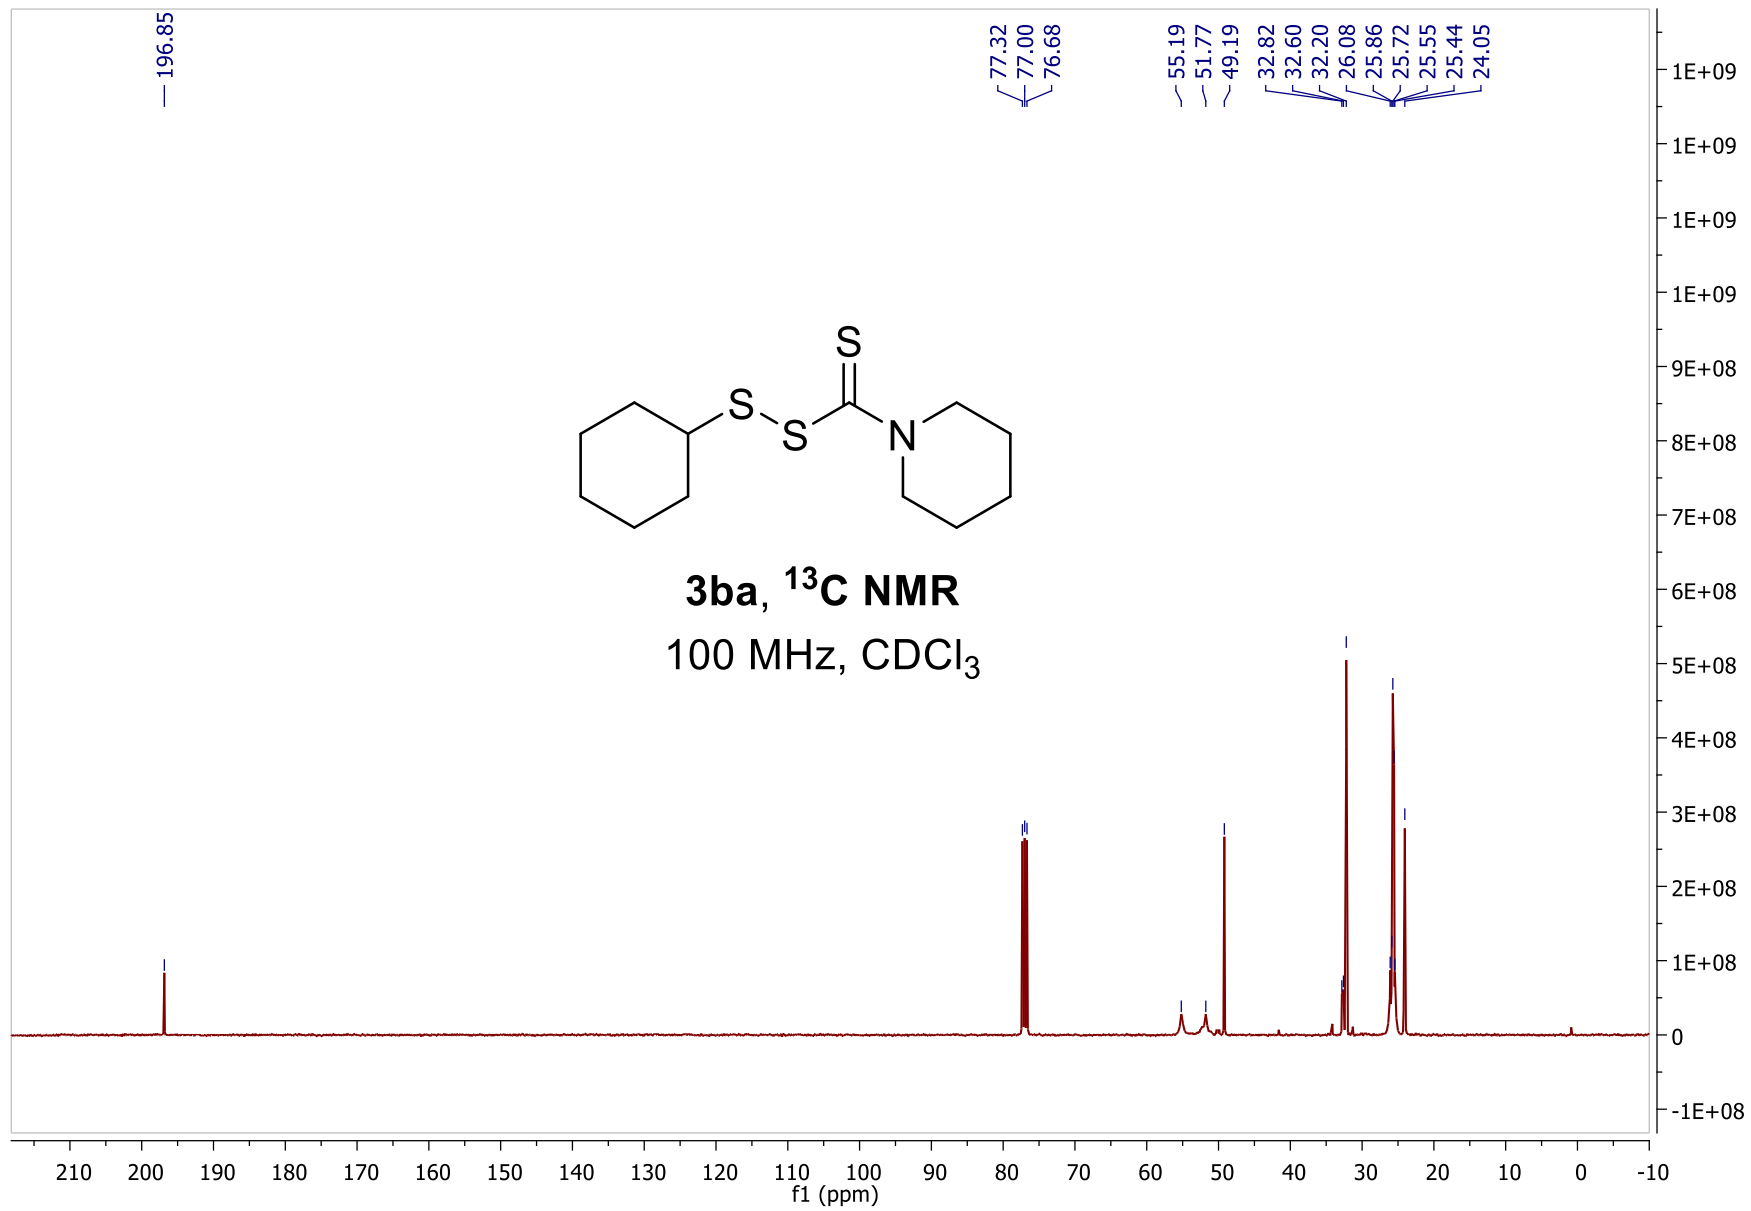

# Spectrum Plot Report

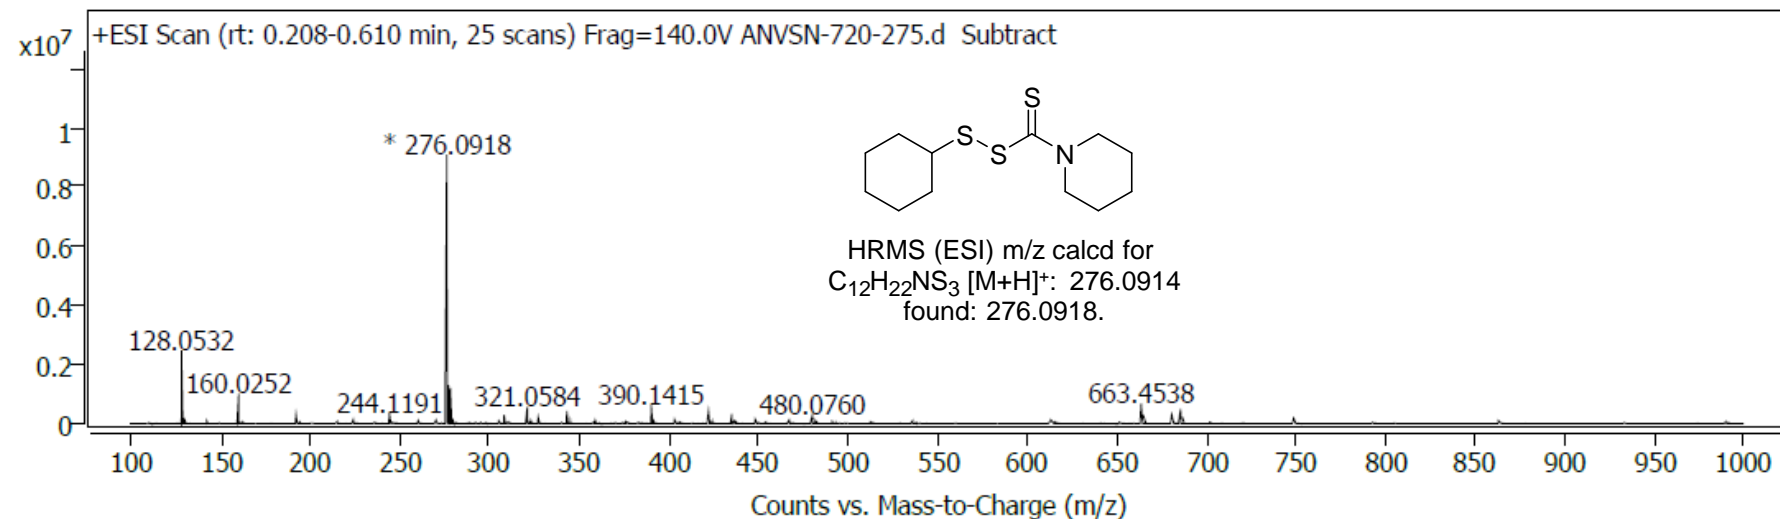

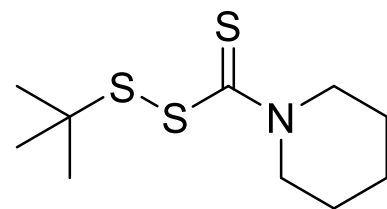

**3ca, <sup>1</sup>H NMR**  
400 MHz, DMSO-d<sub>6</sub>

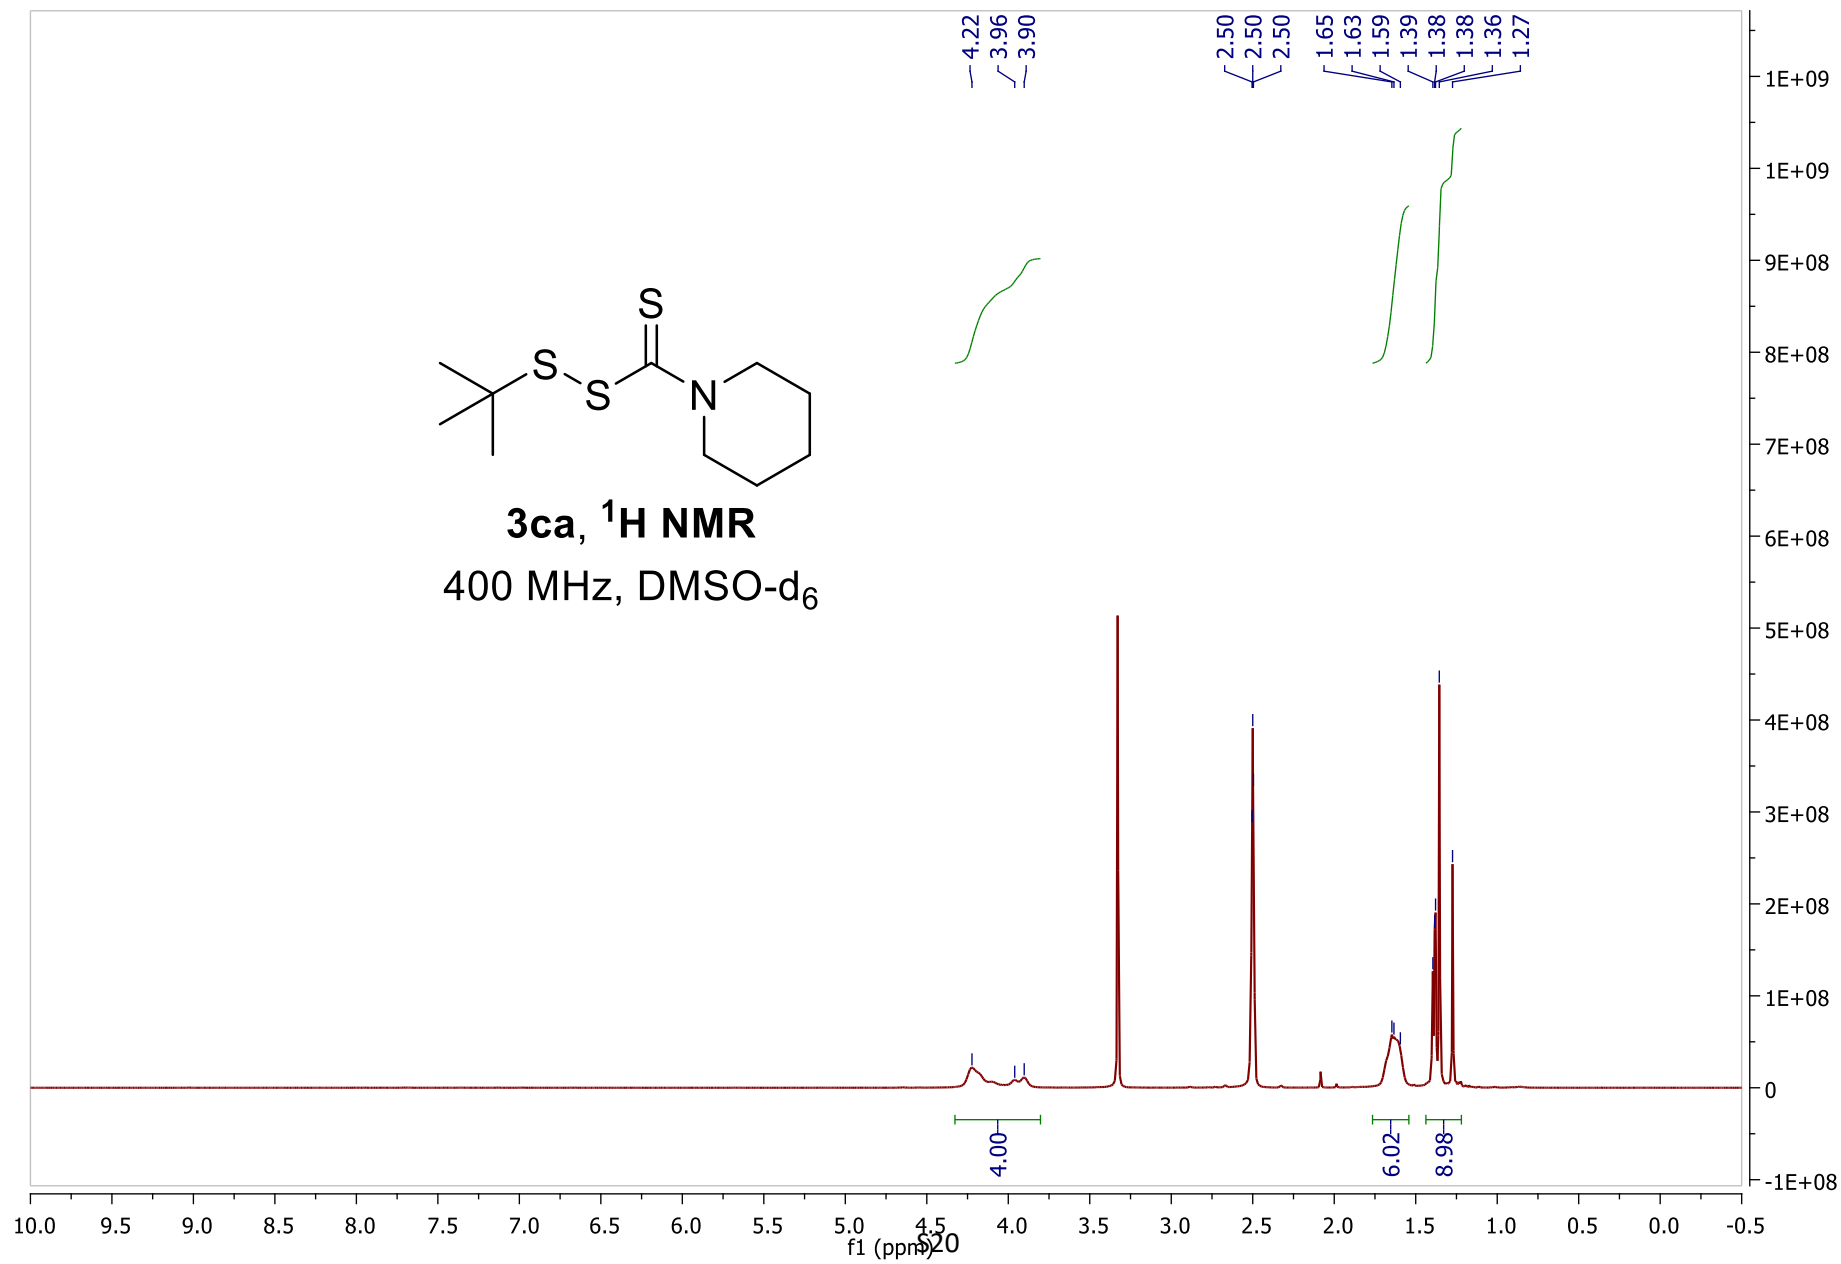

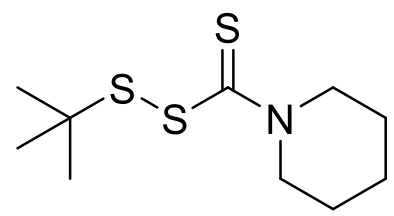

**3ca, <sup>13</sup>C NMR**  
100 MHz, DMSO-d<sub>6</sub>

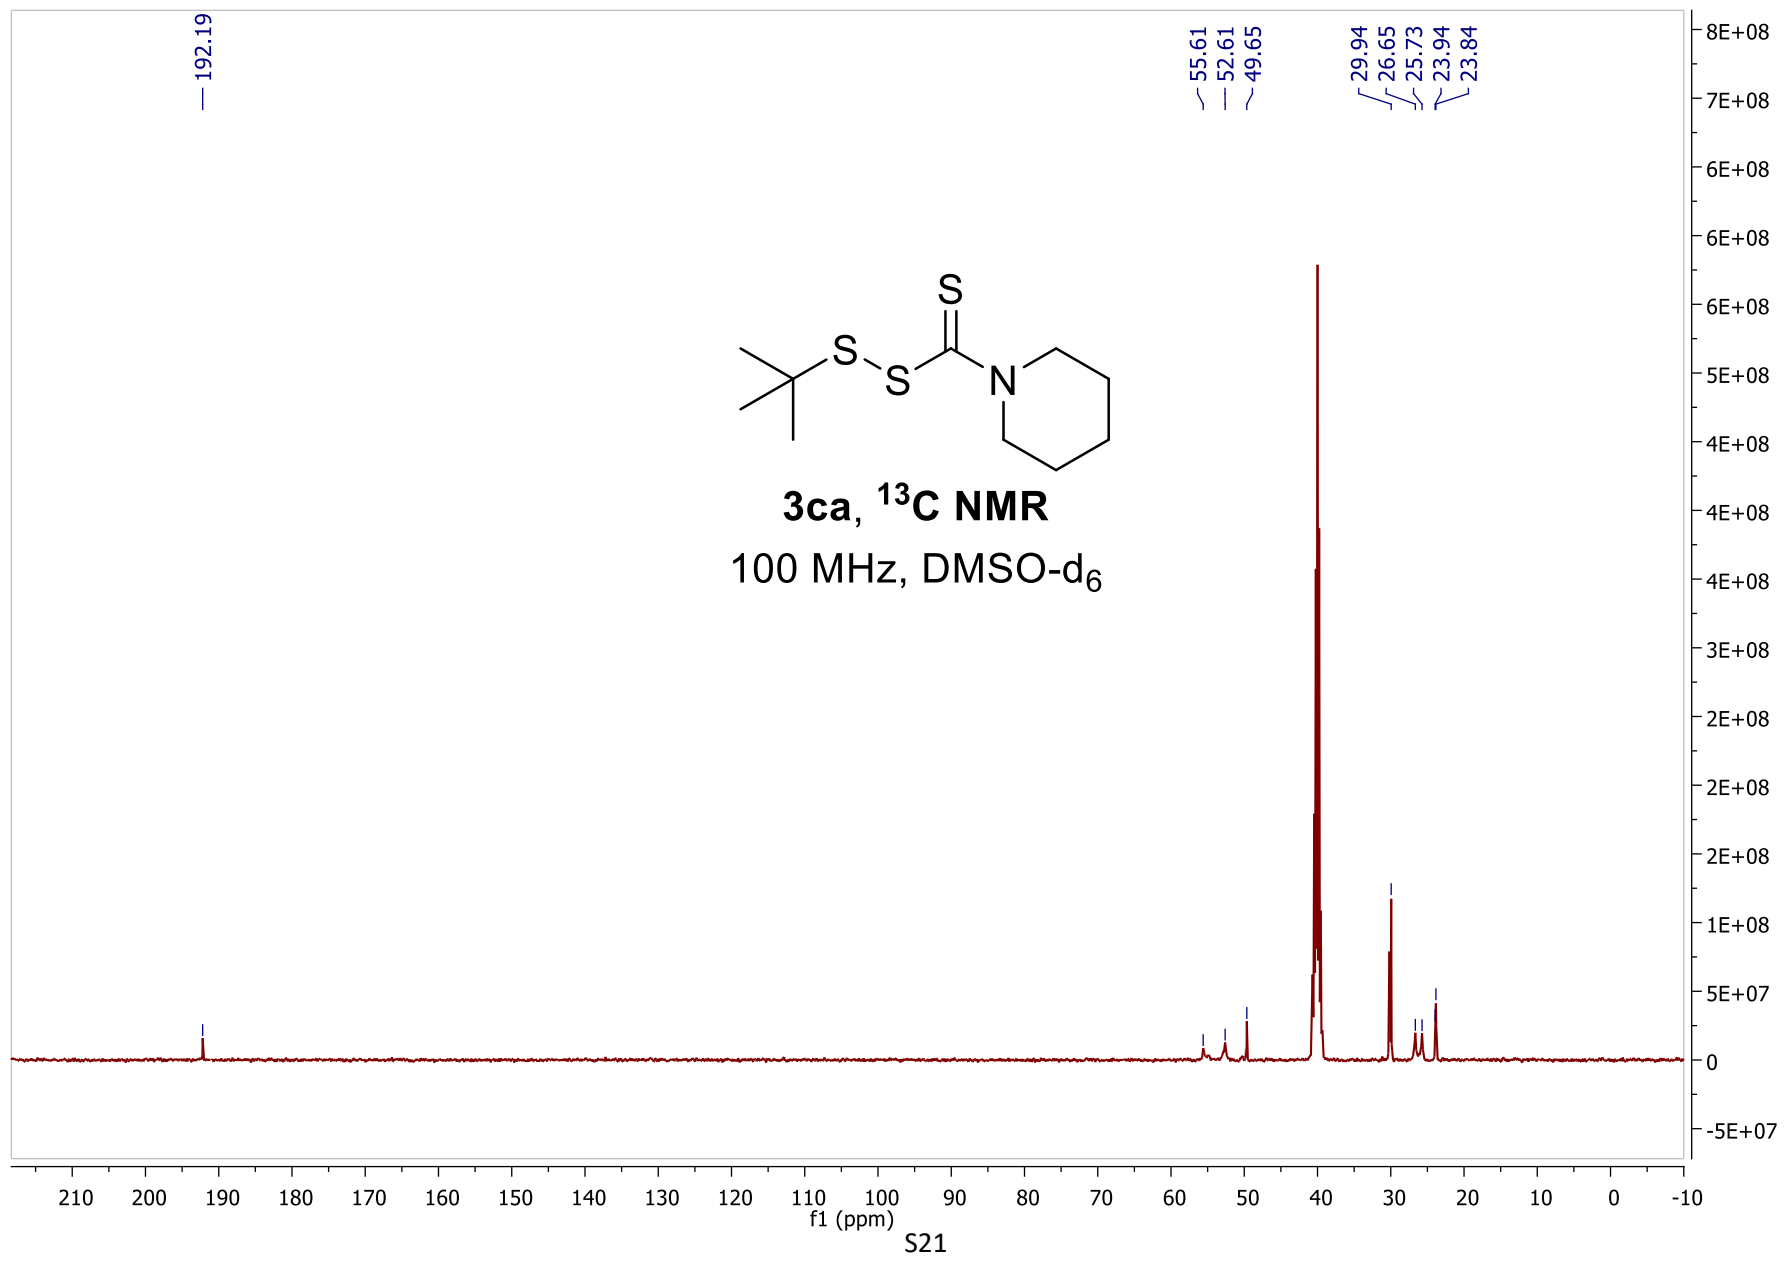

# Spectrum Plot Report

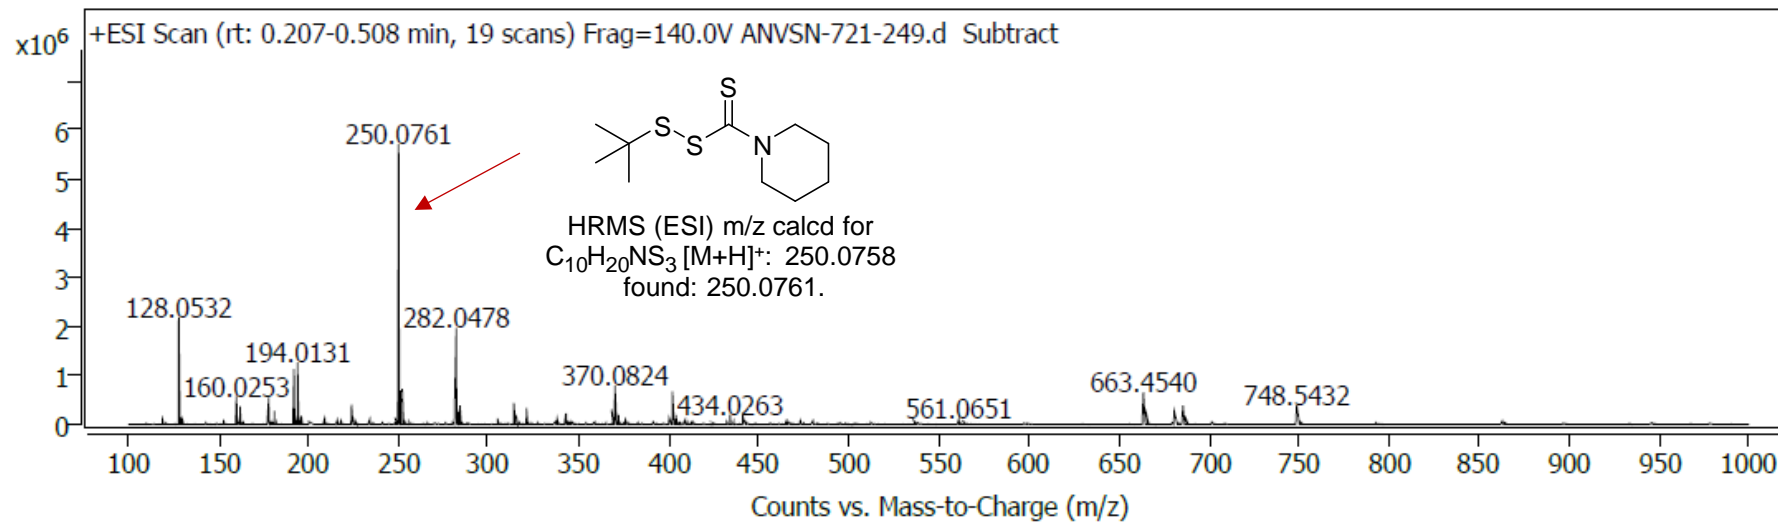

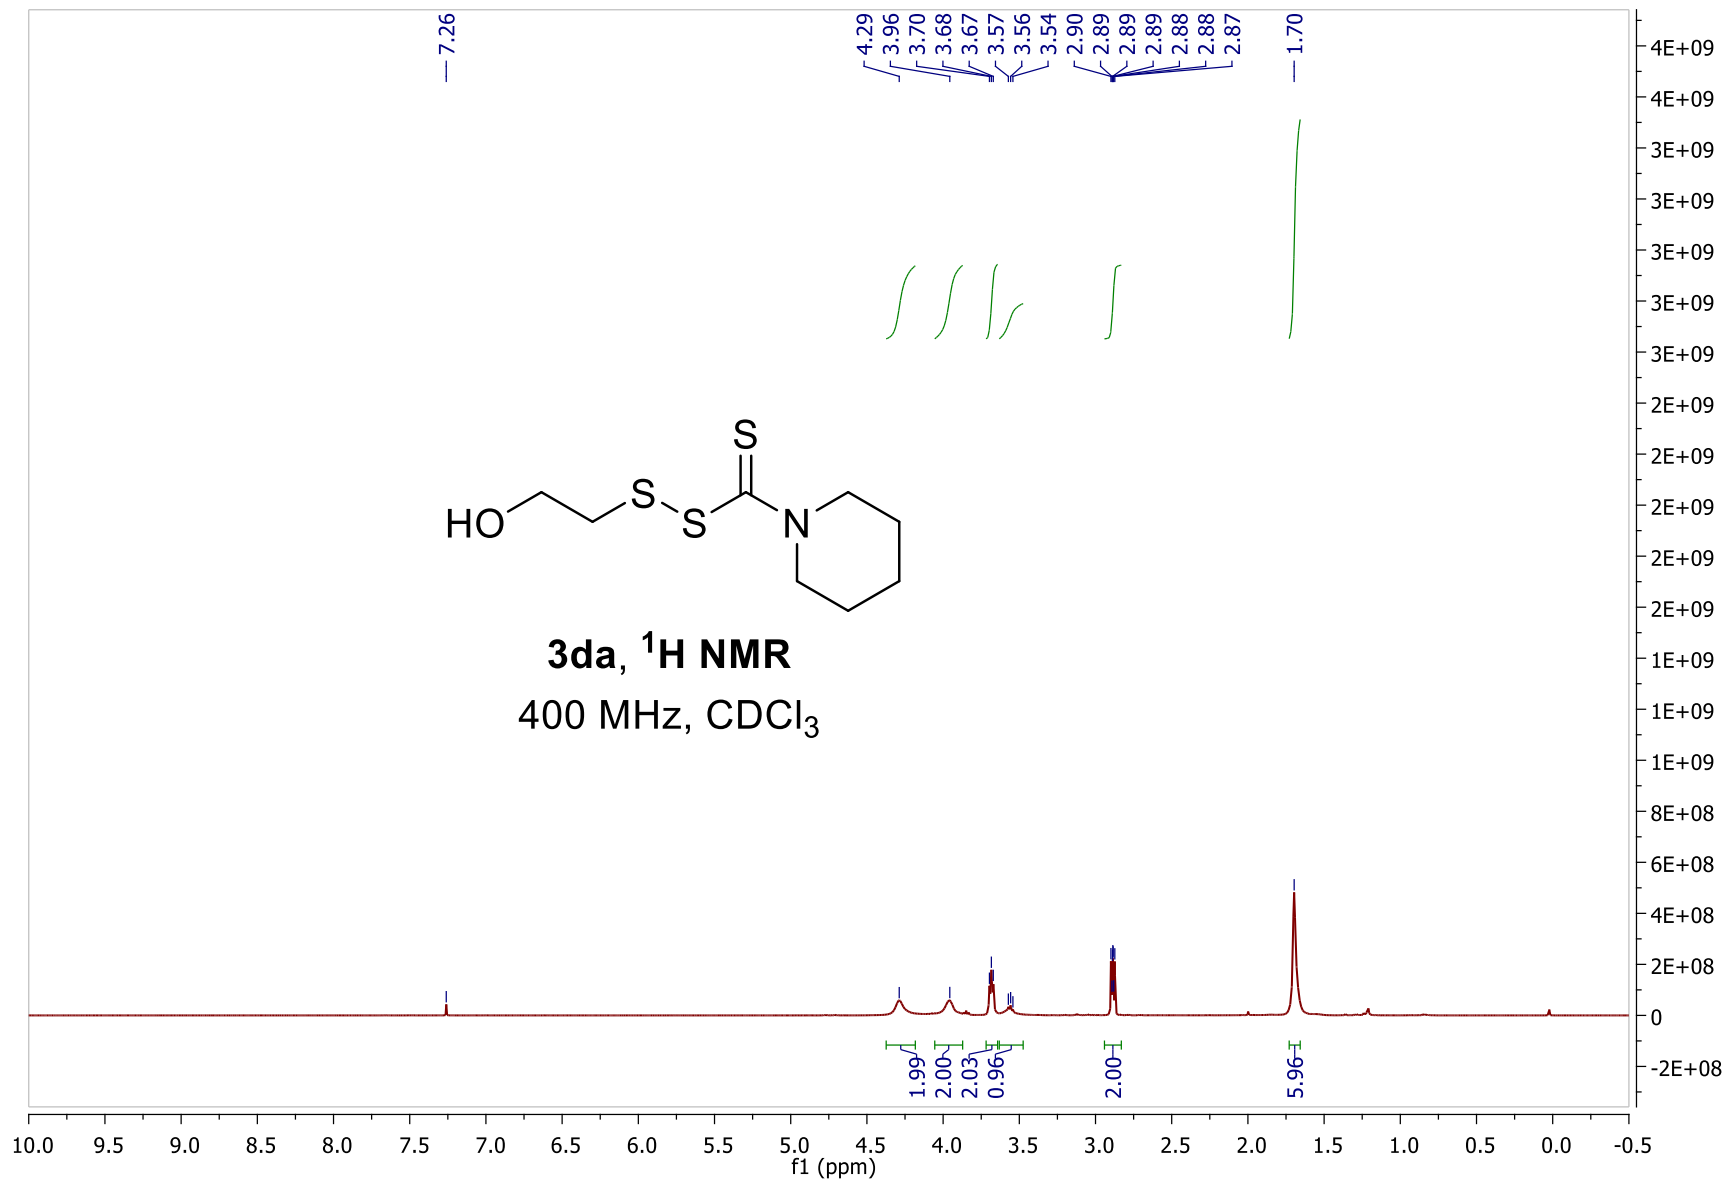

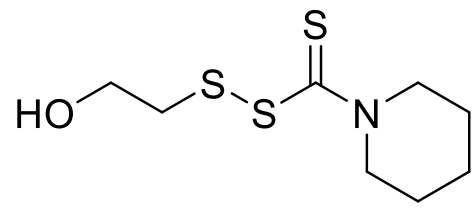

**3da,  $^{13}\text{C}$  NMR**  
100 MHz,  $\text{CDCl}_3$

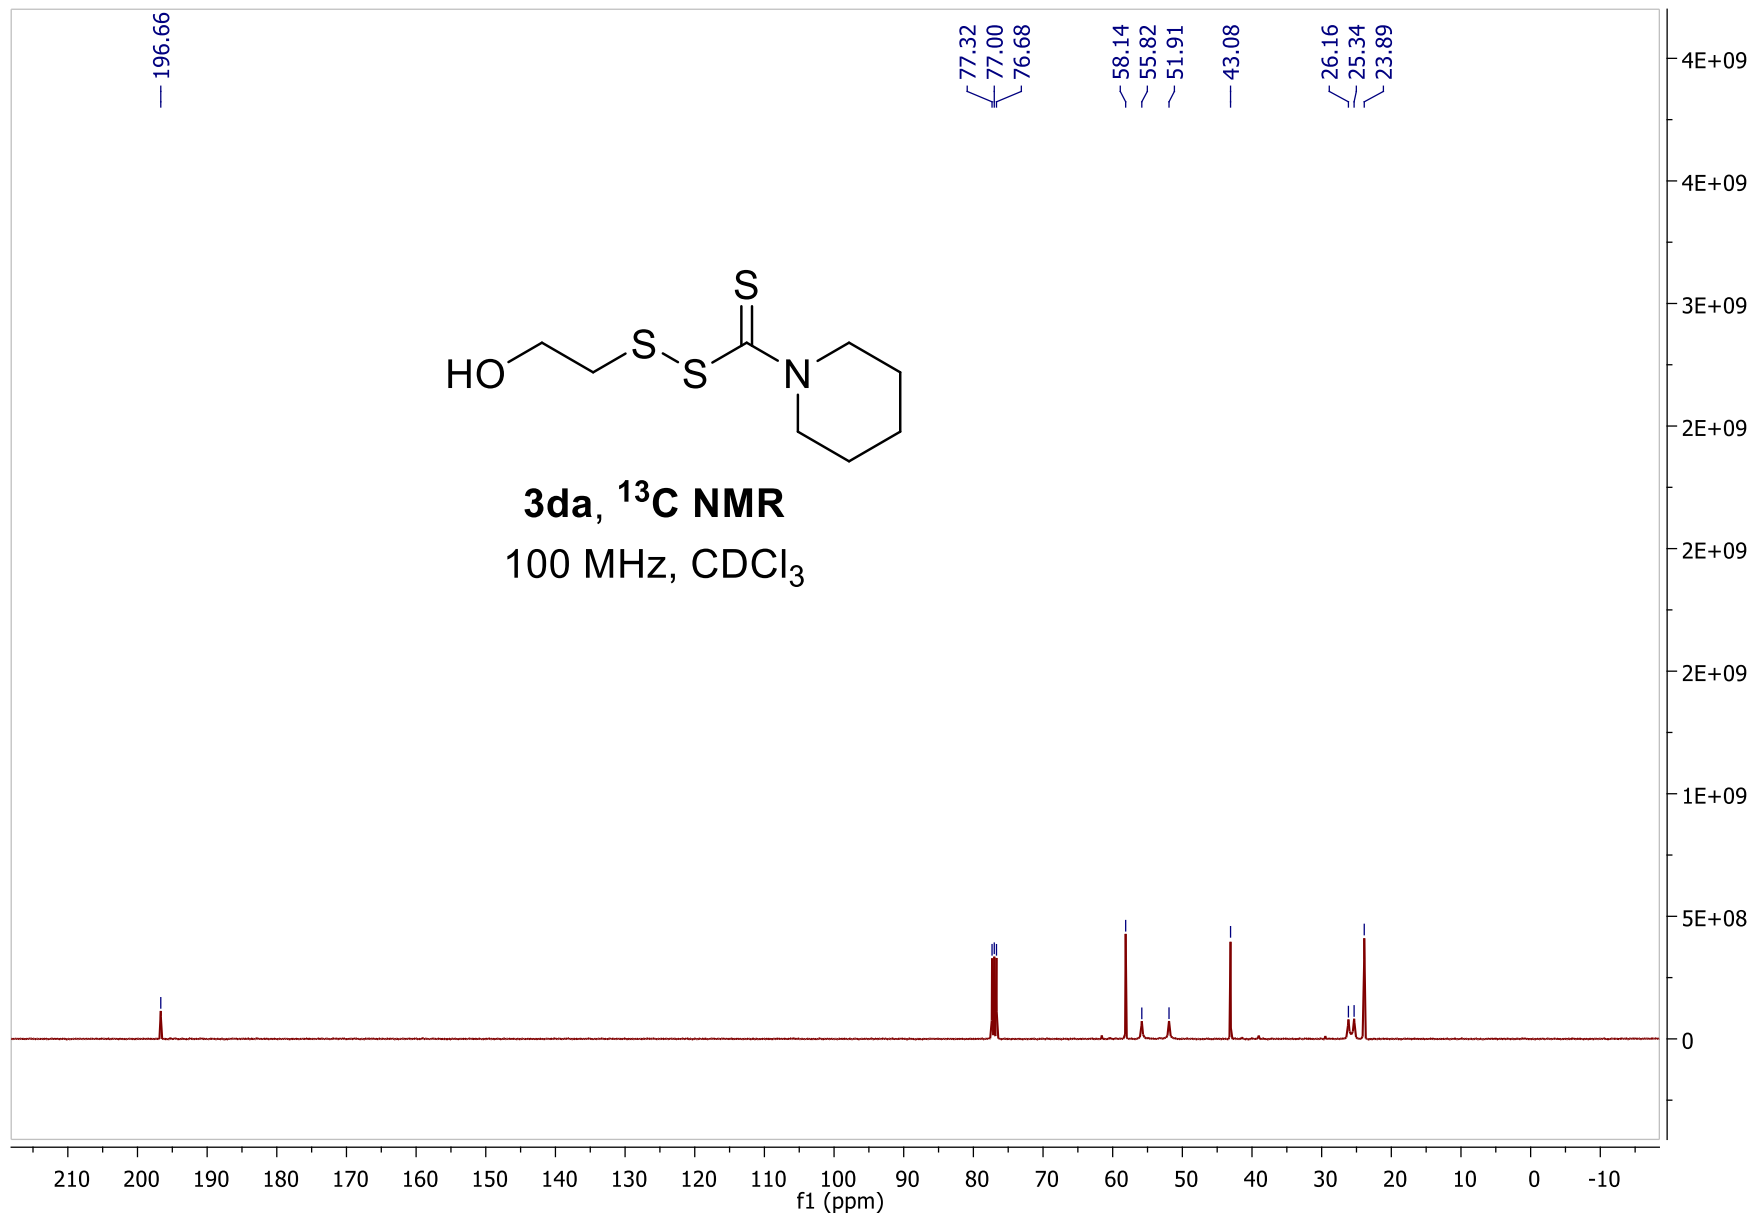



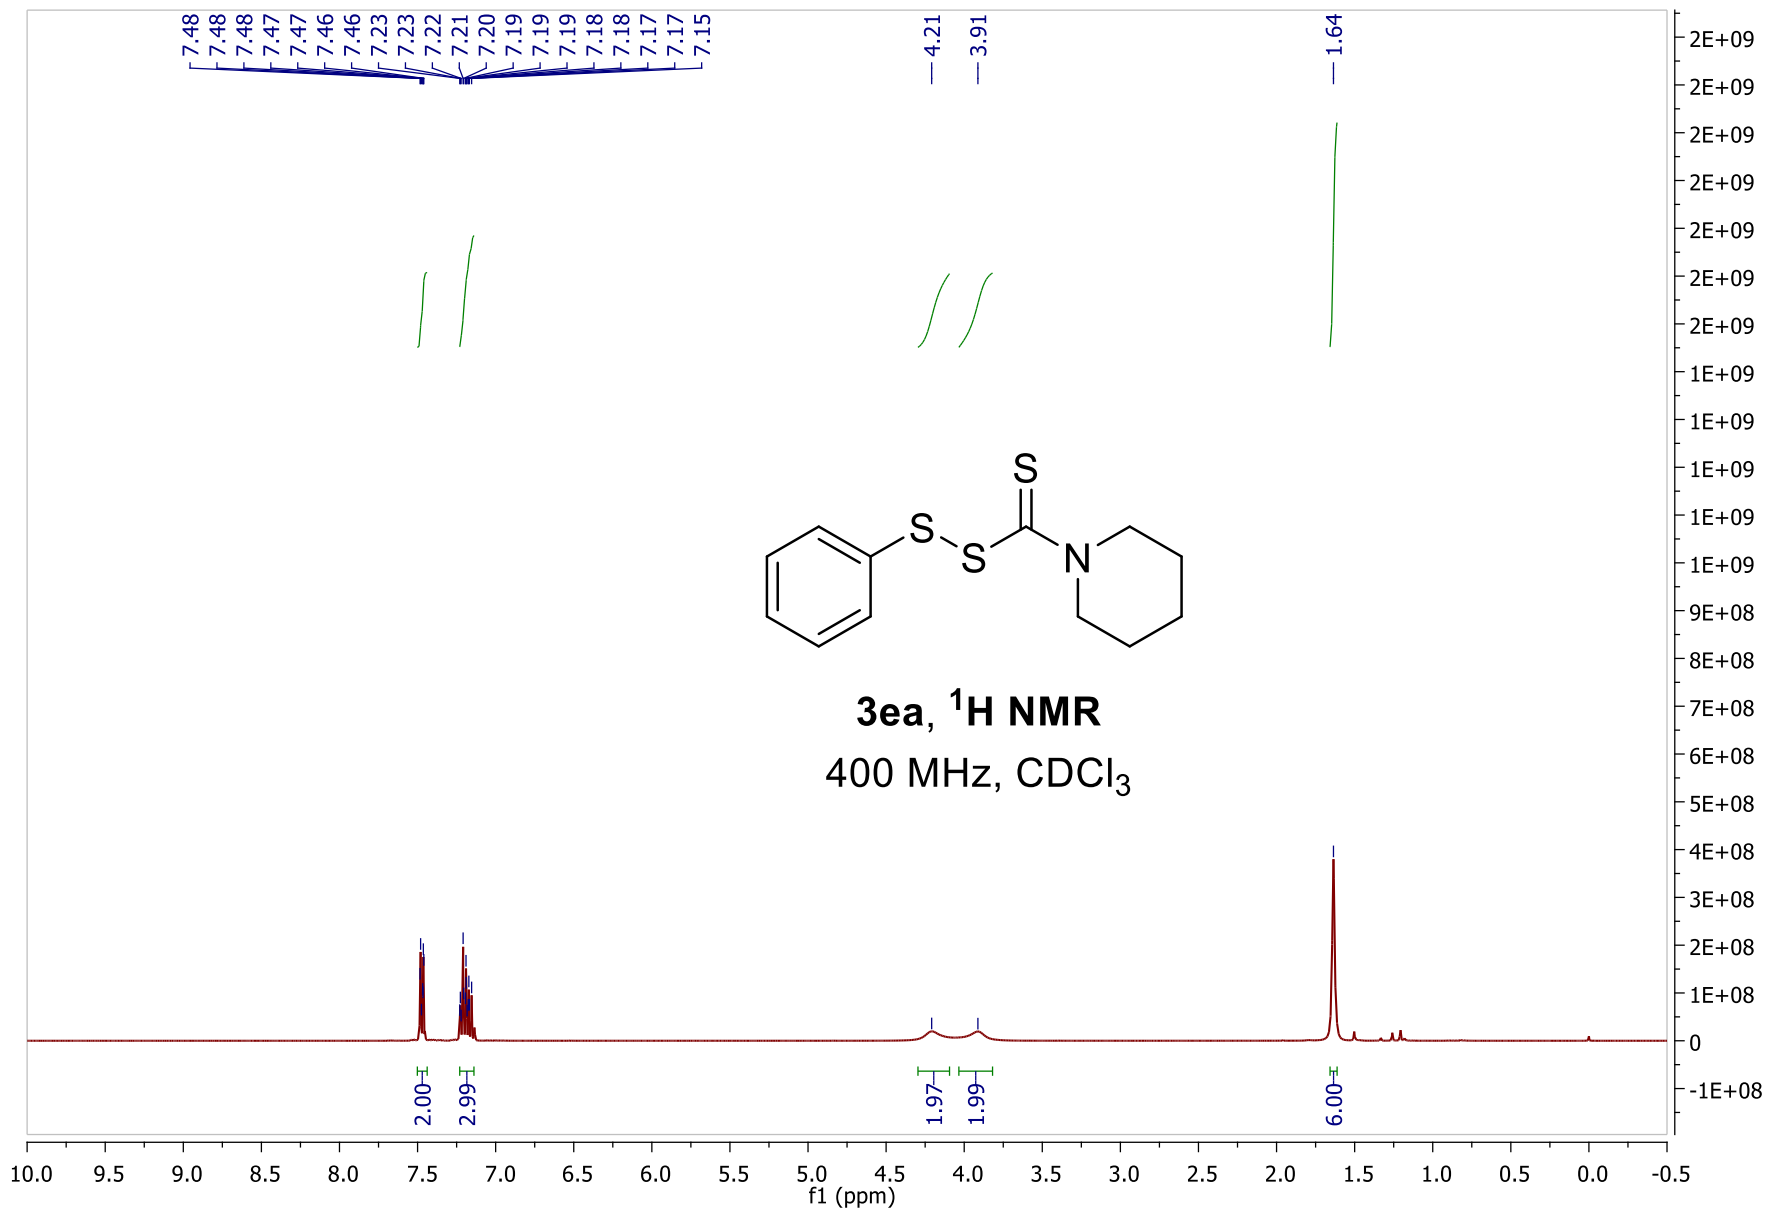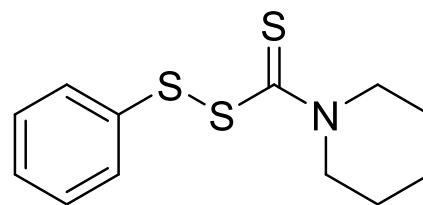

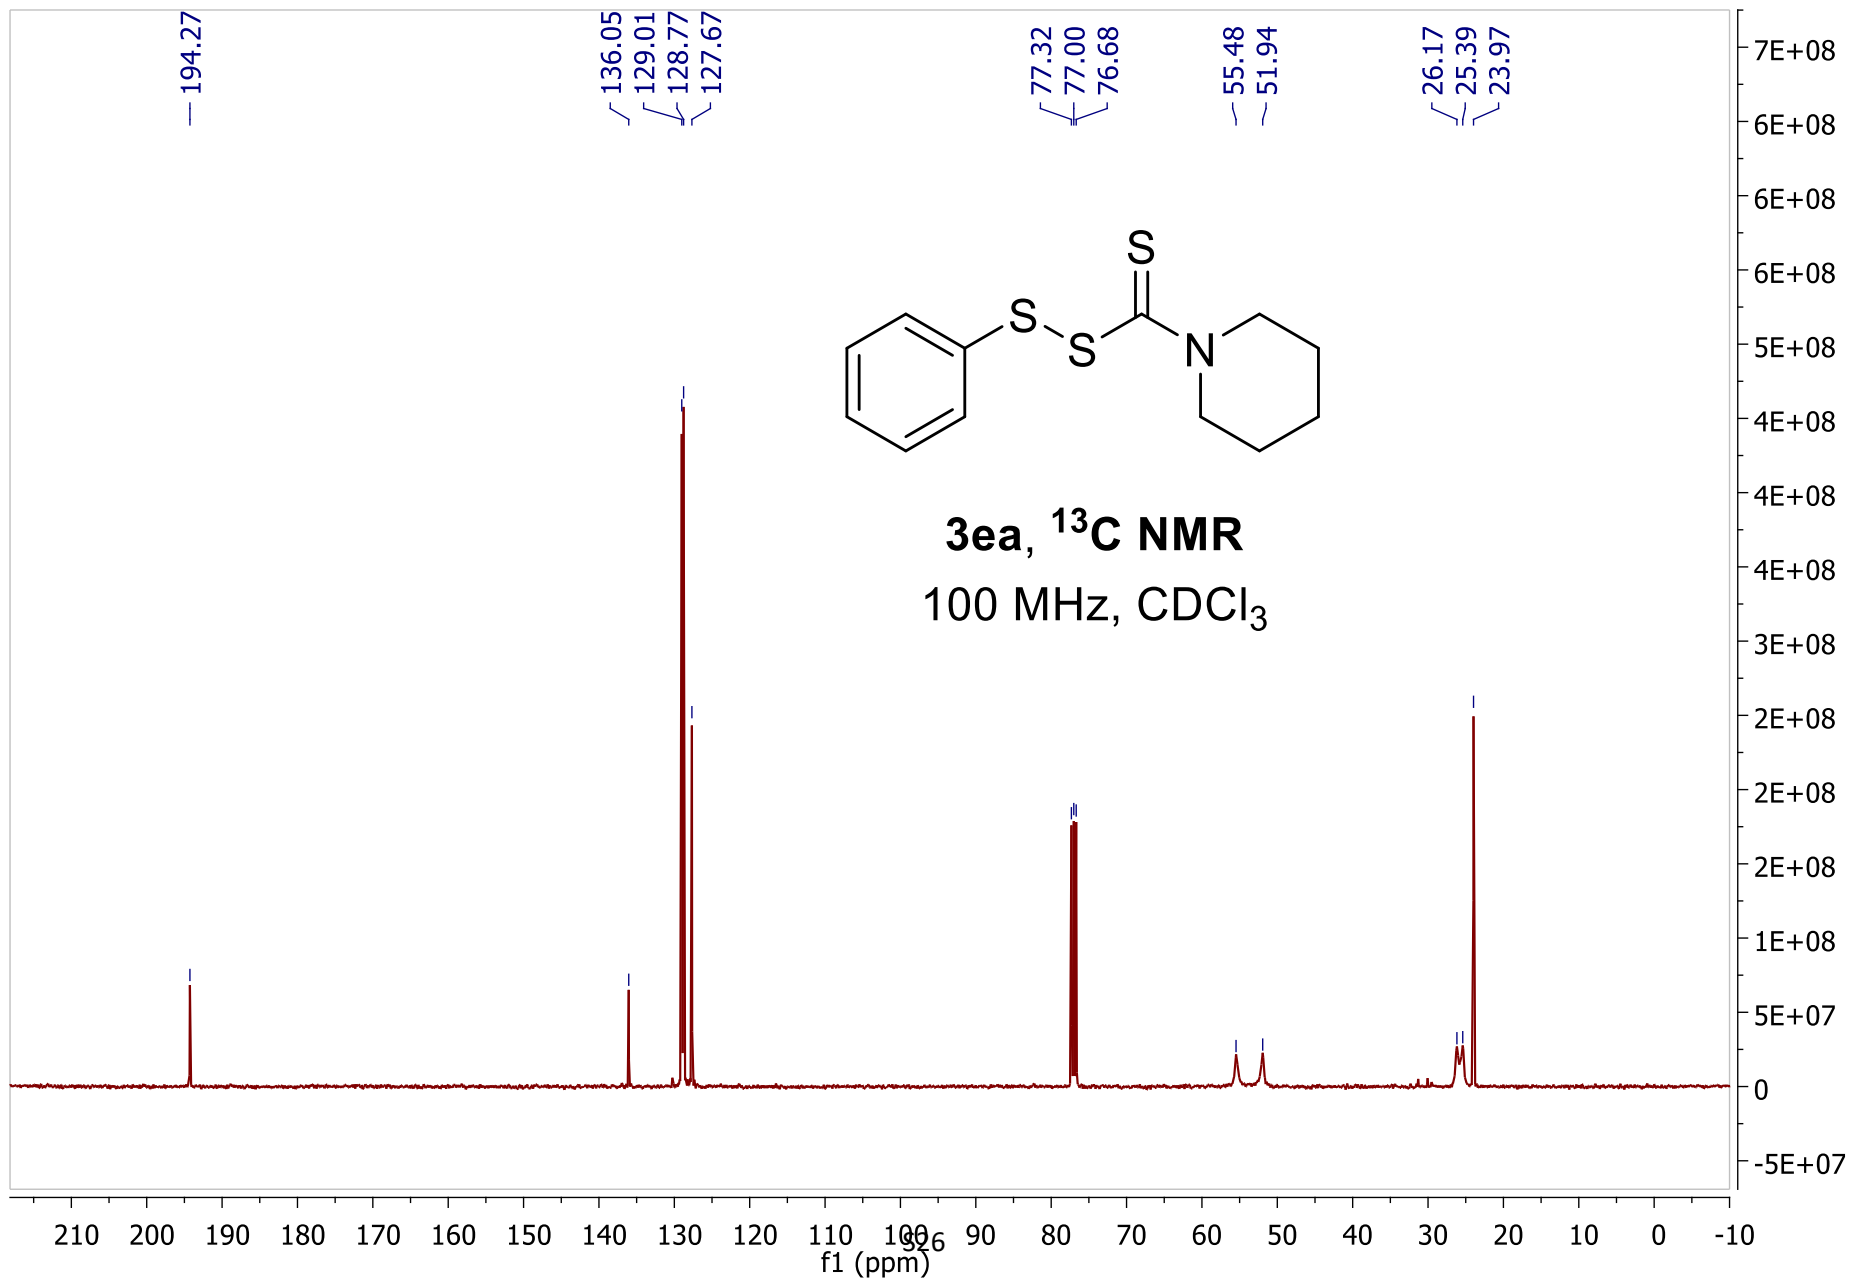

# Spectrum Plot Report

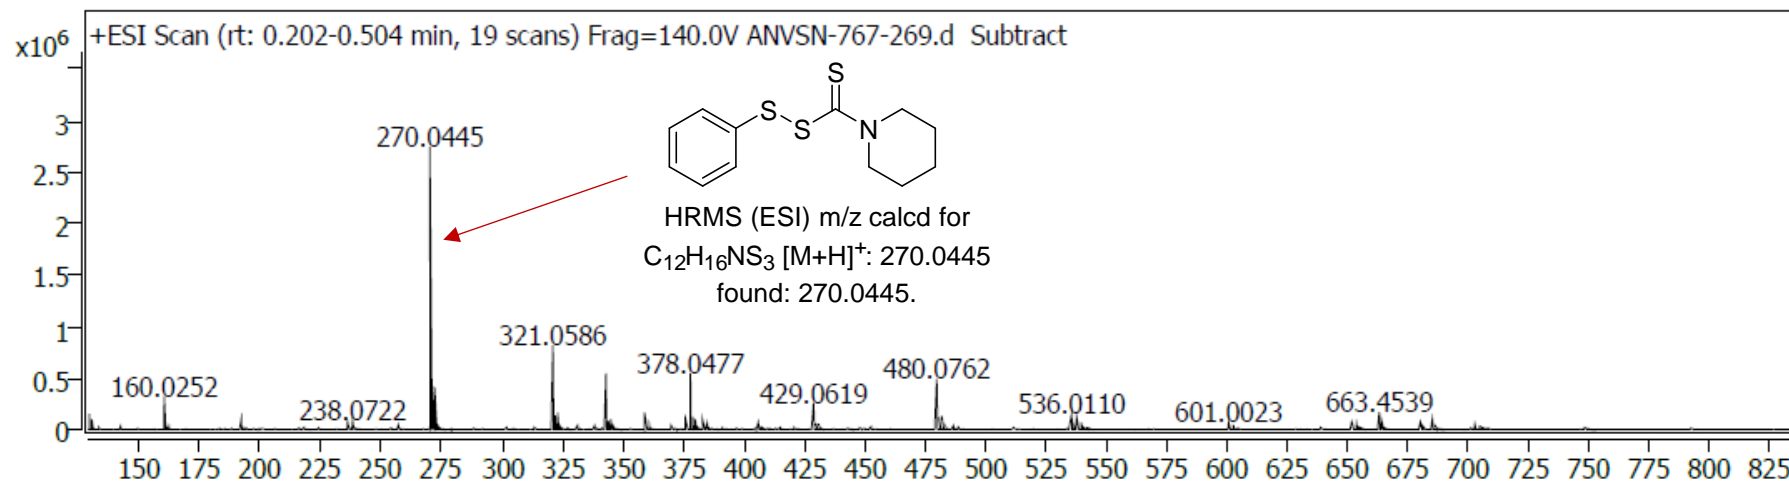

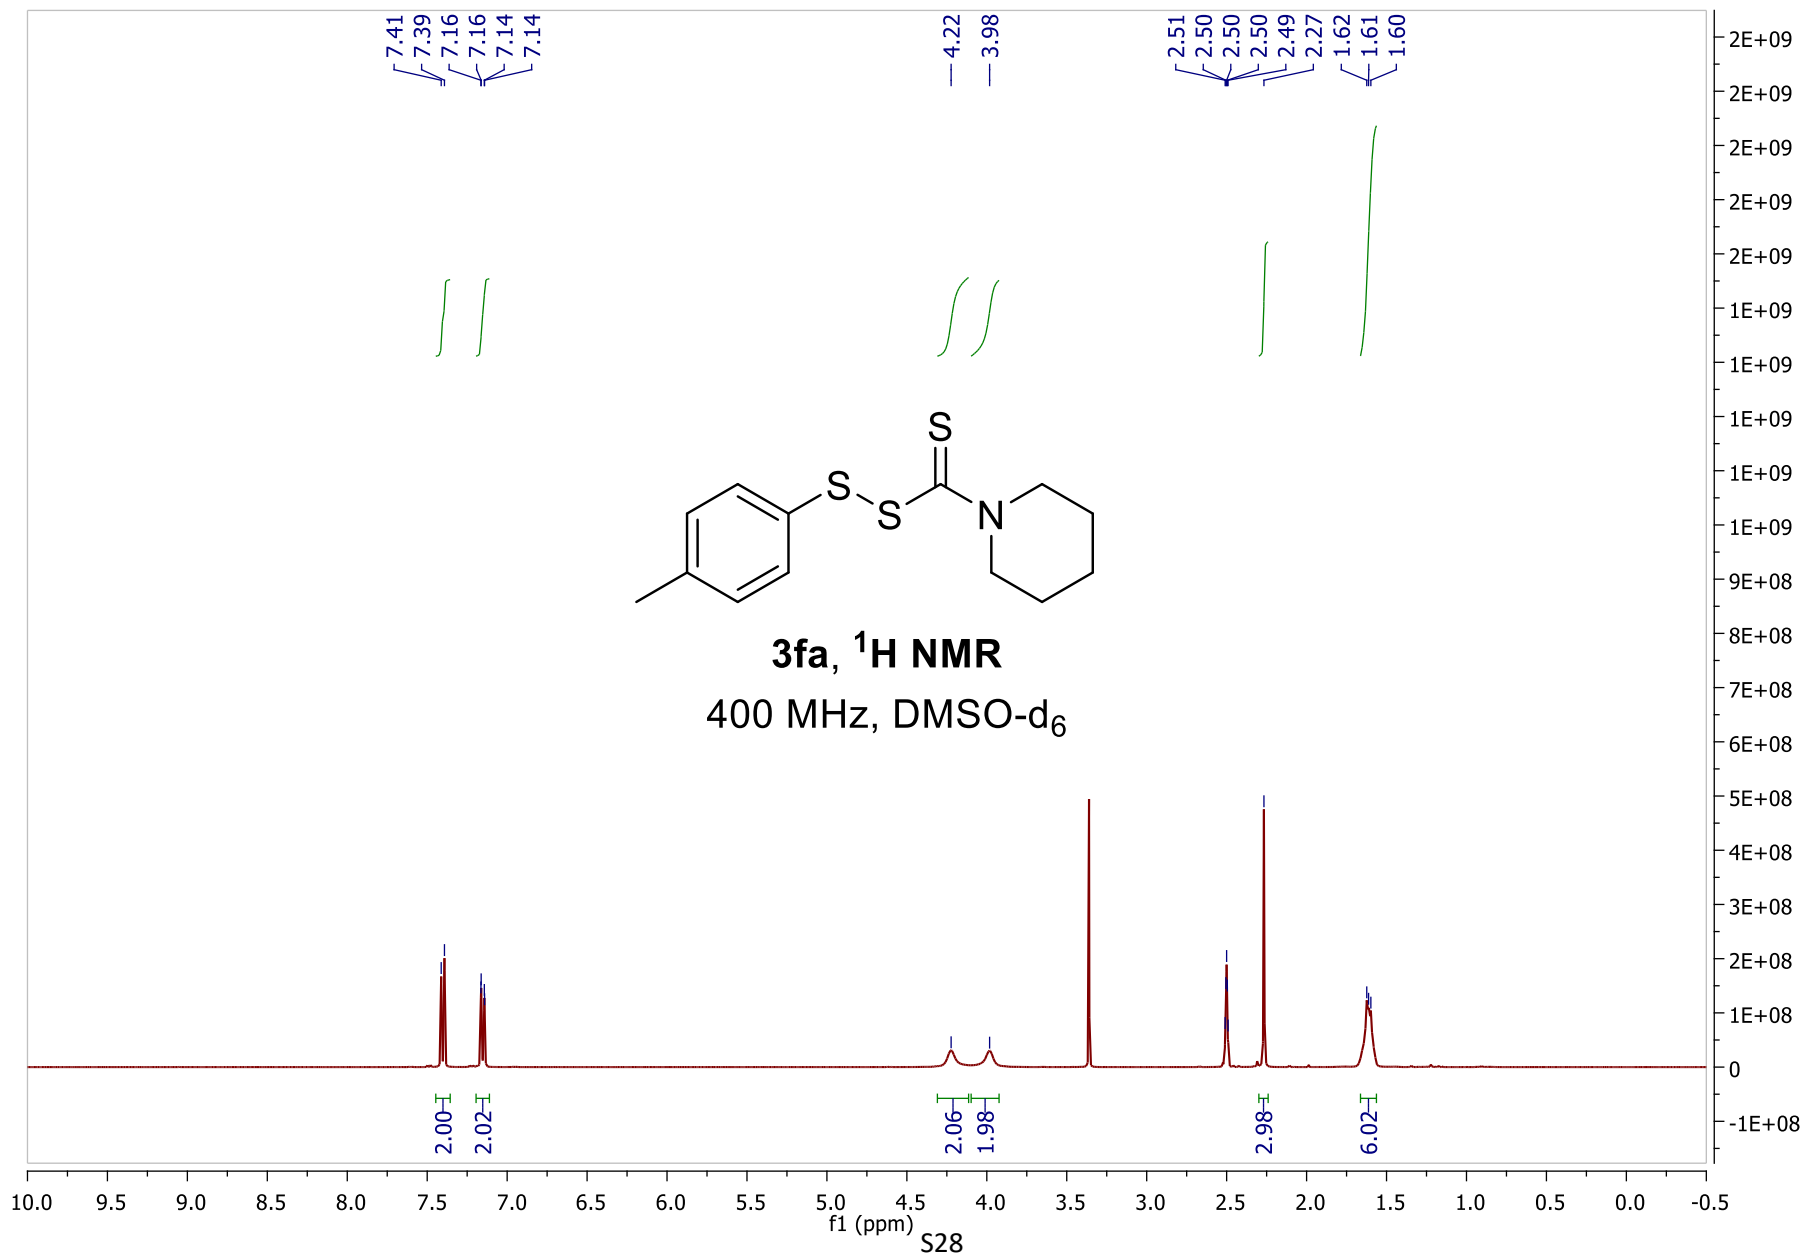

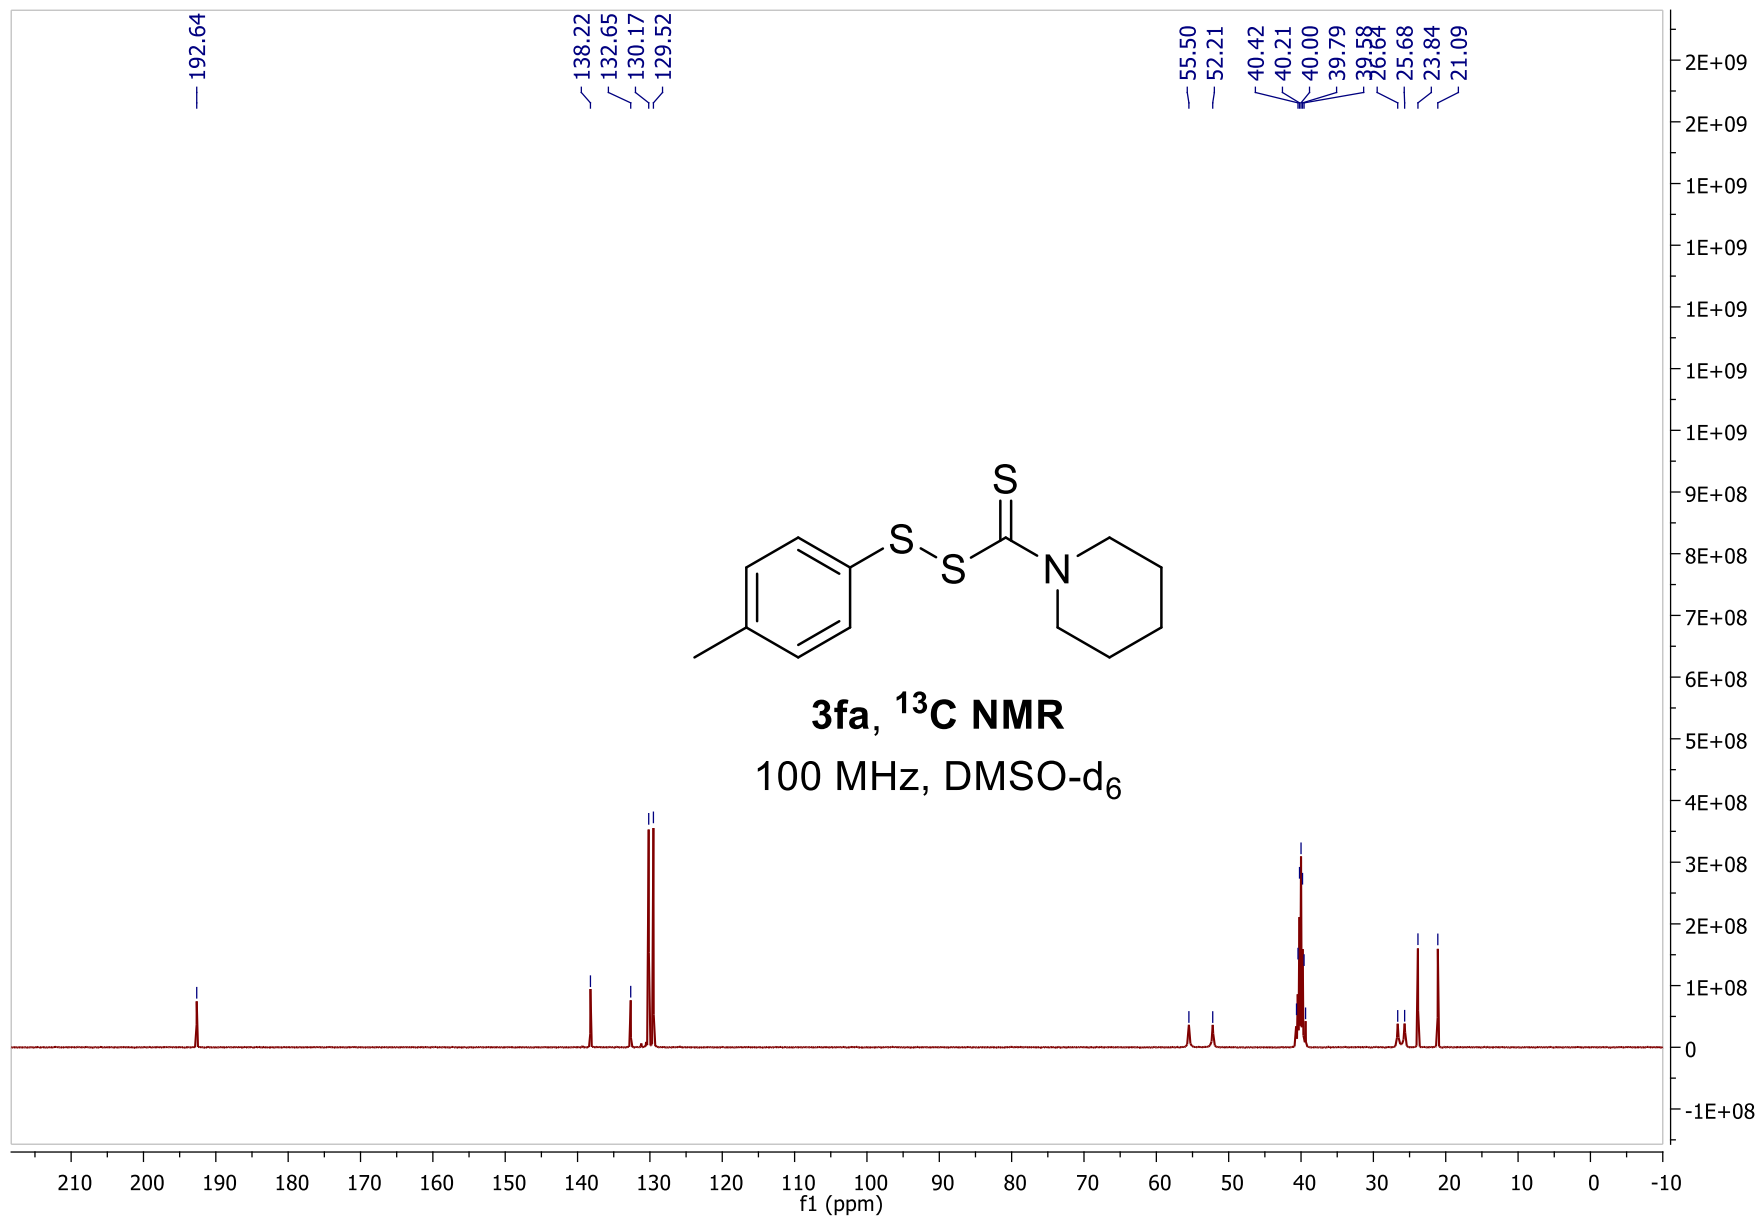

# Spectrum Plot Report

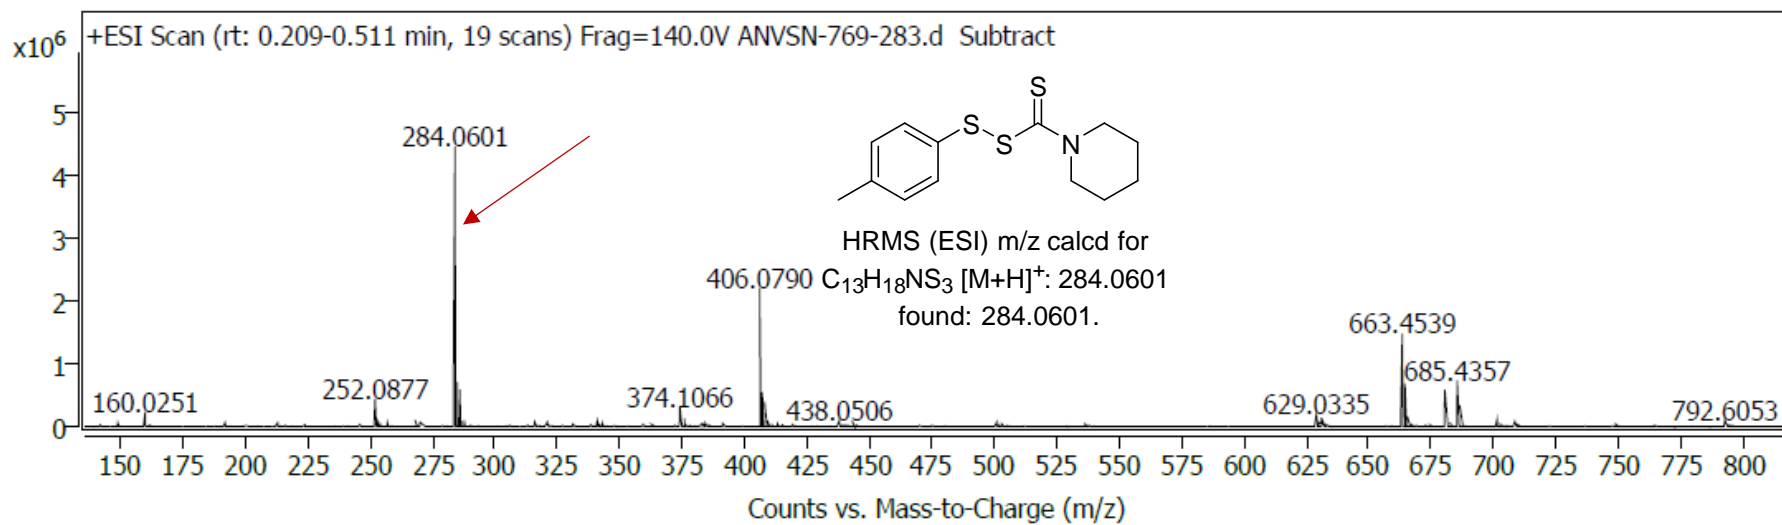

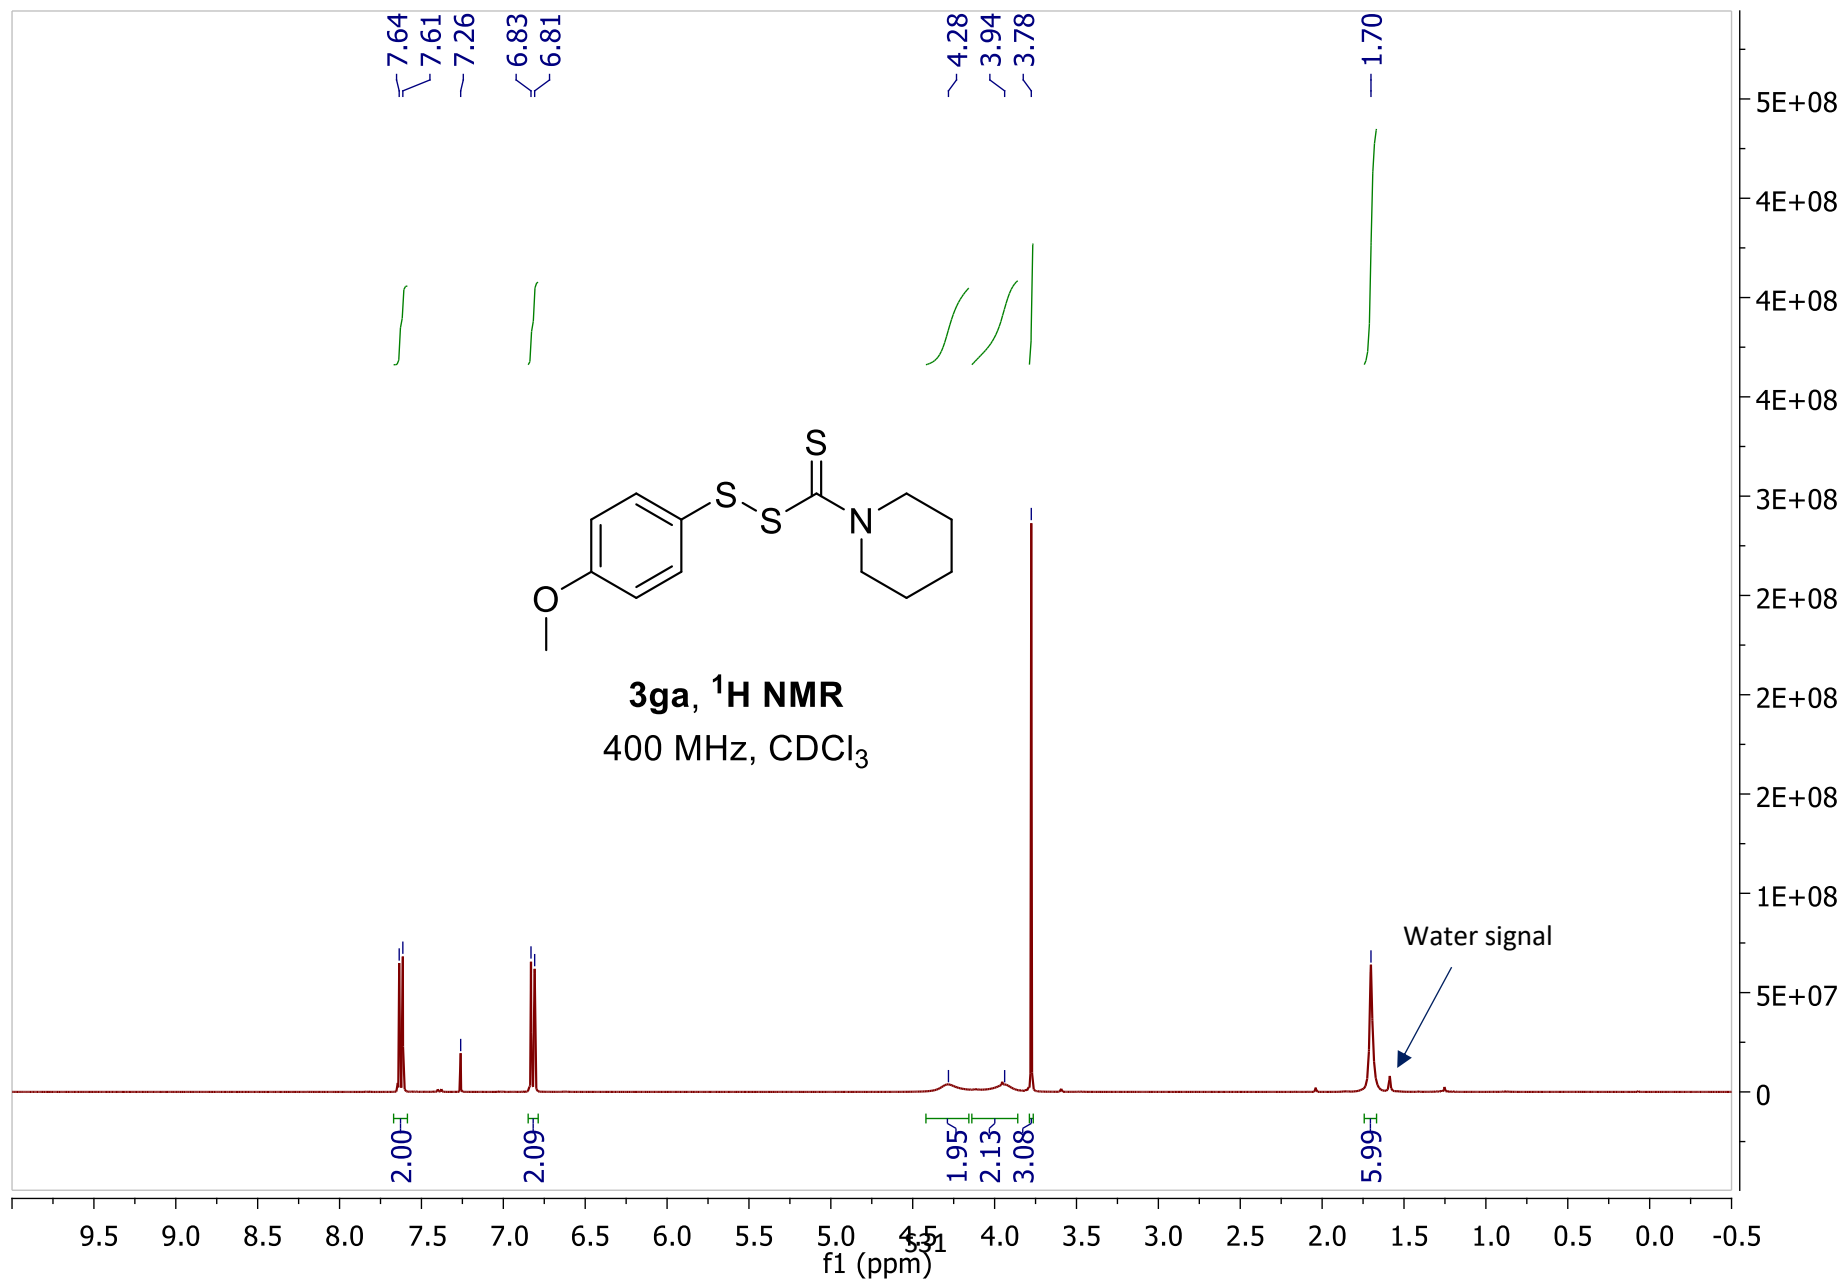

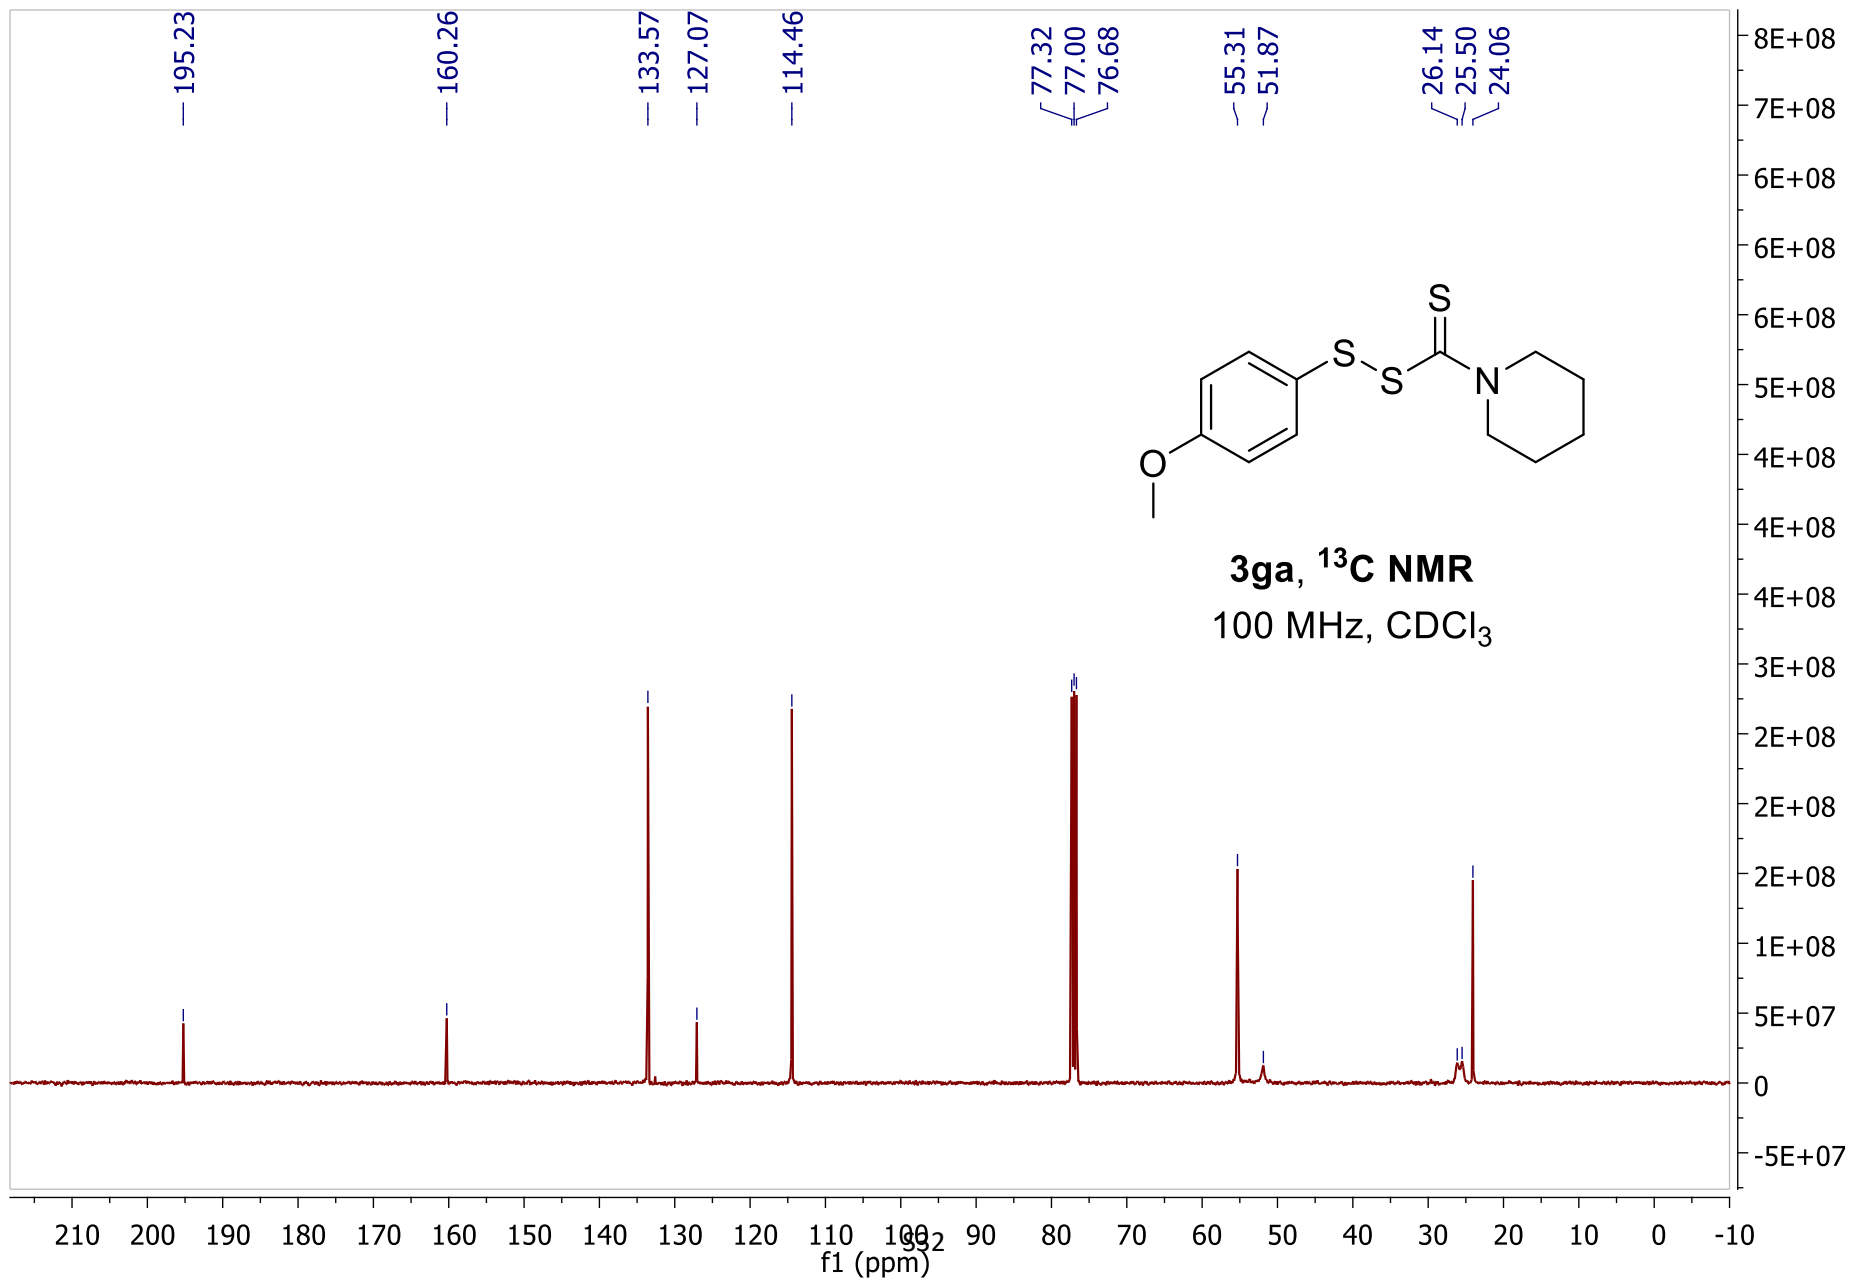



# Spectrum Plot Report

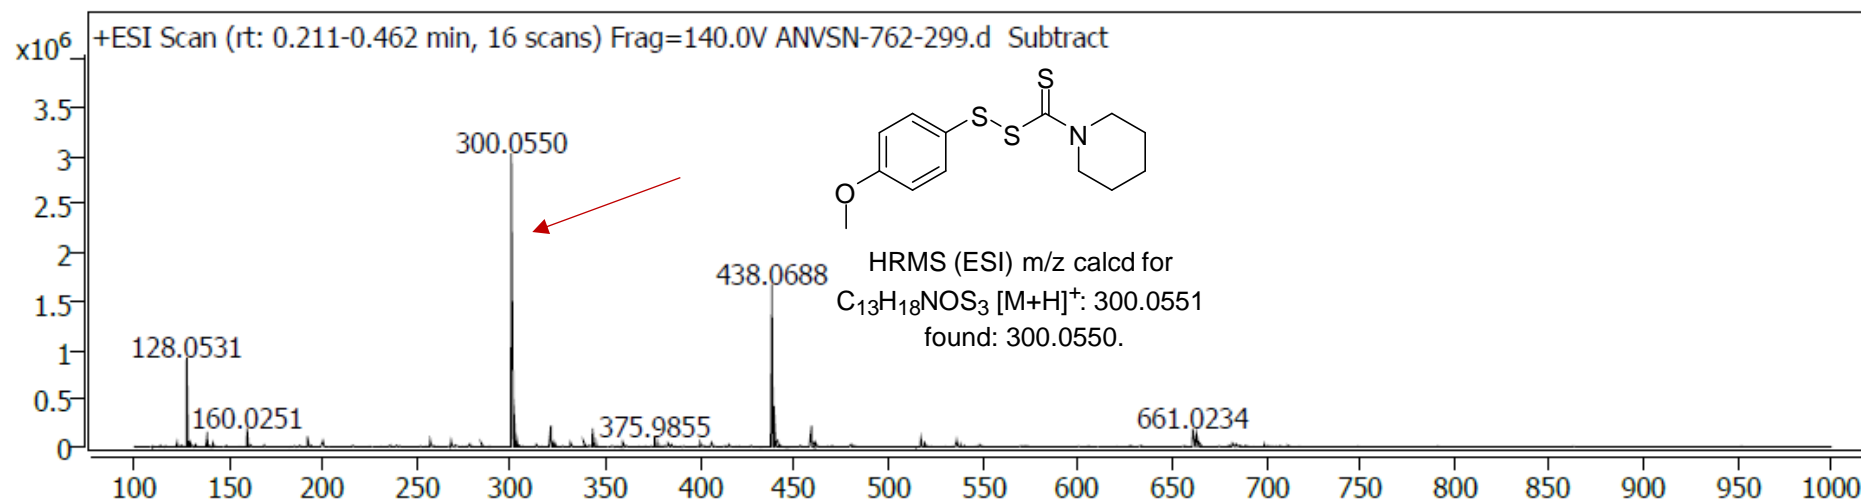

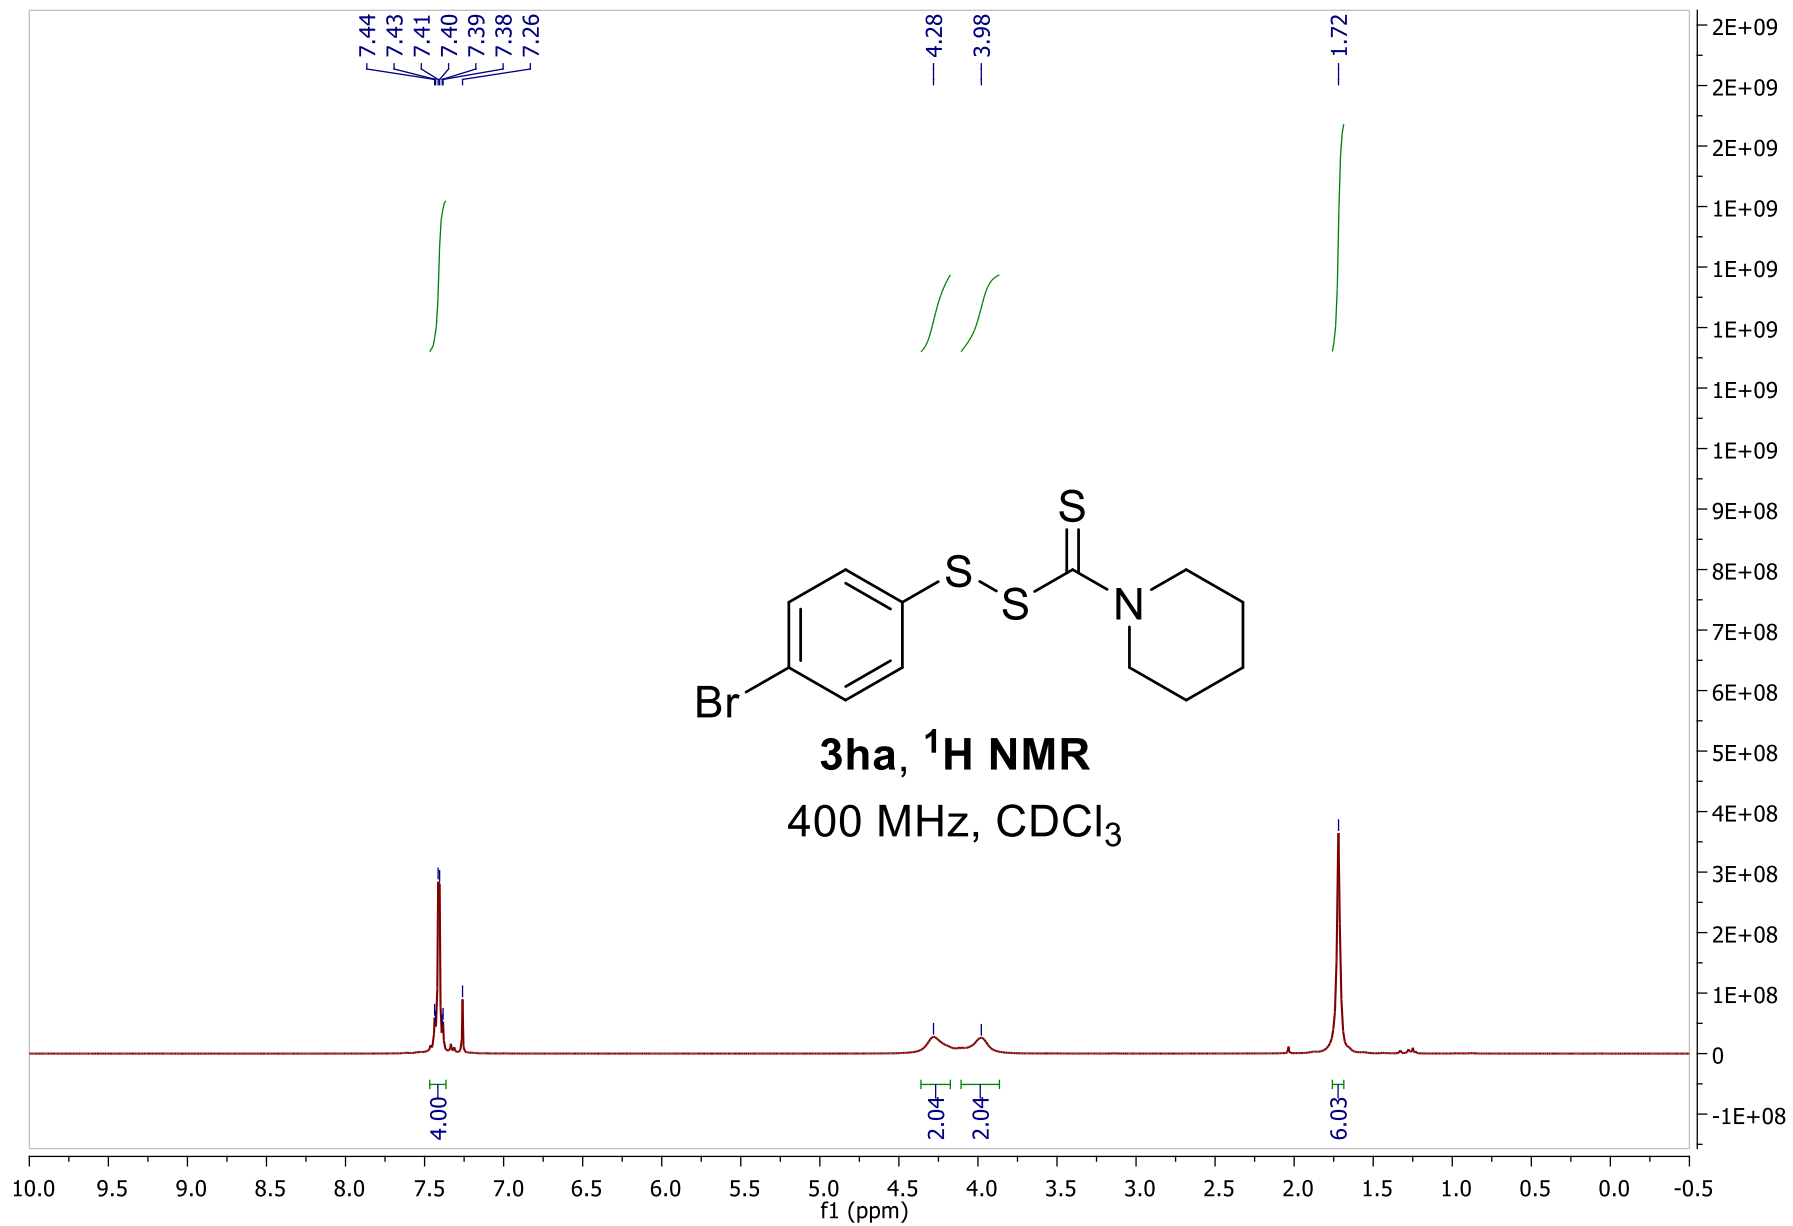

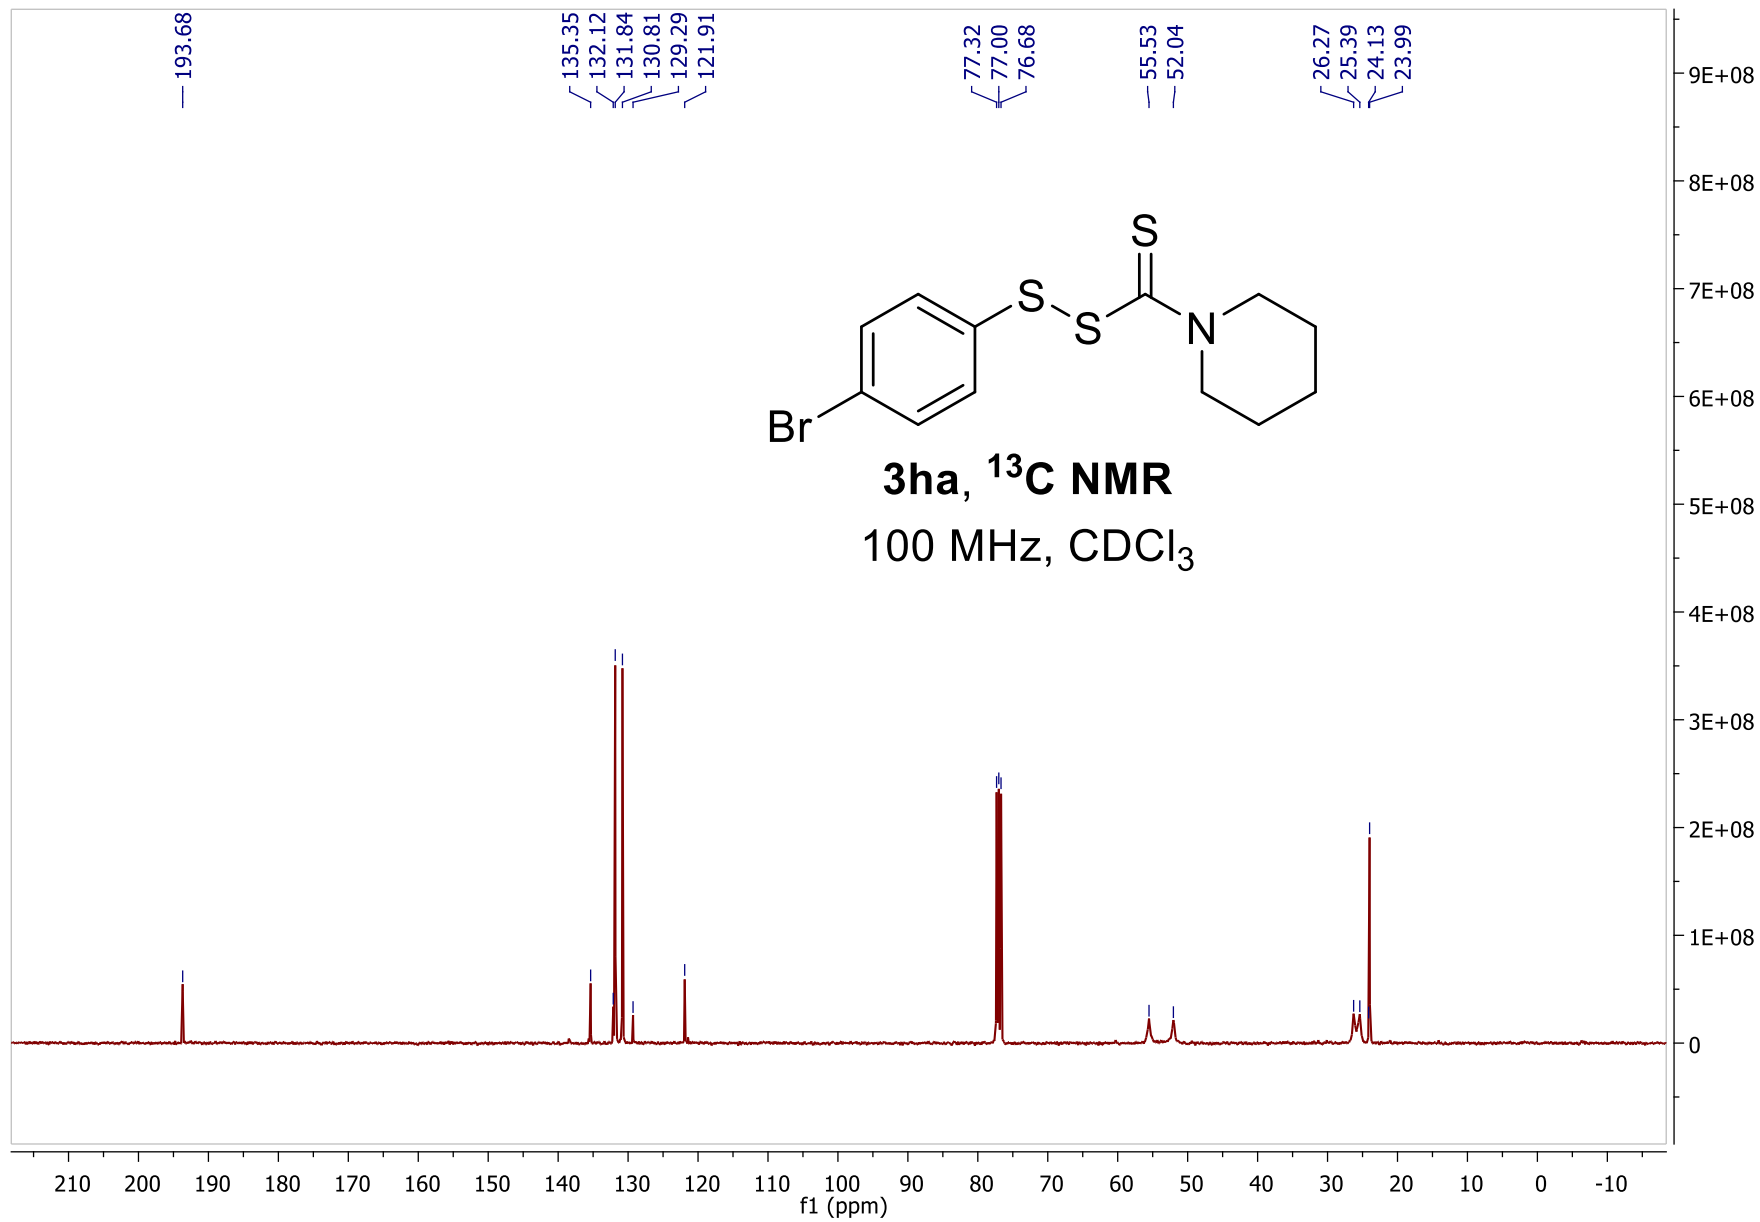

S35

# Spectrum Plot Report

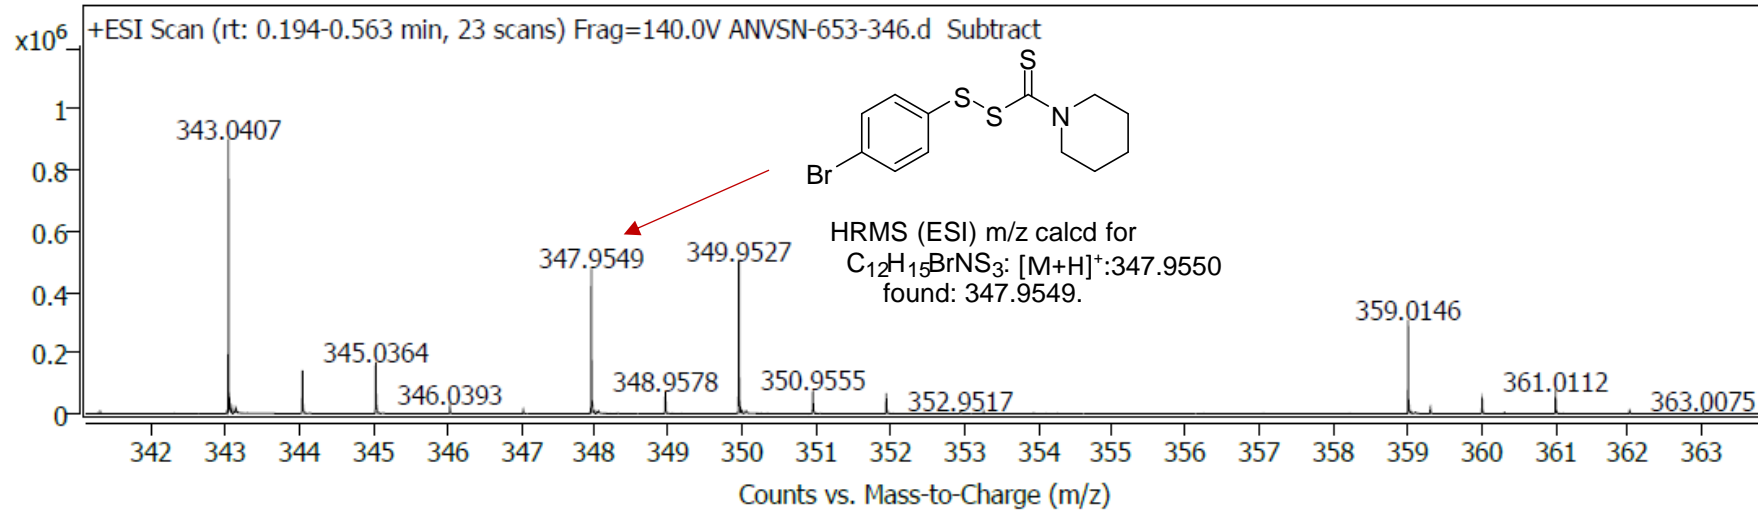

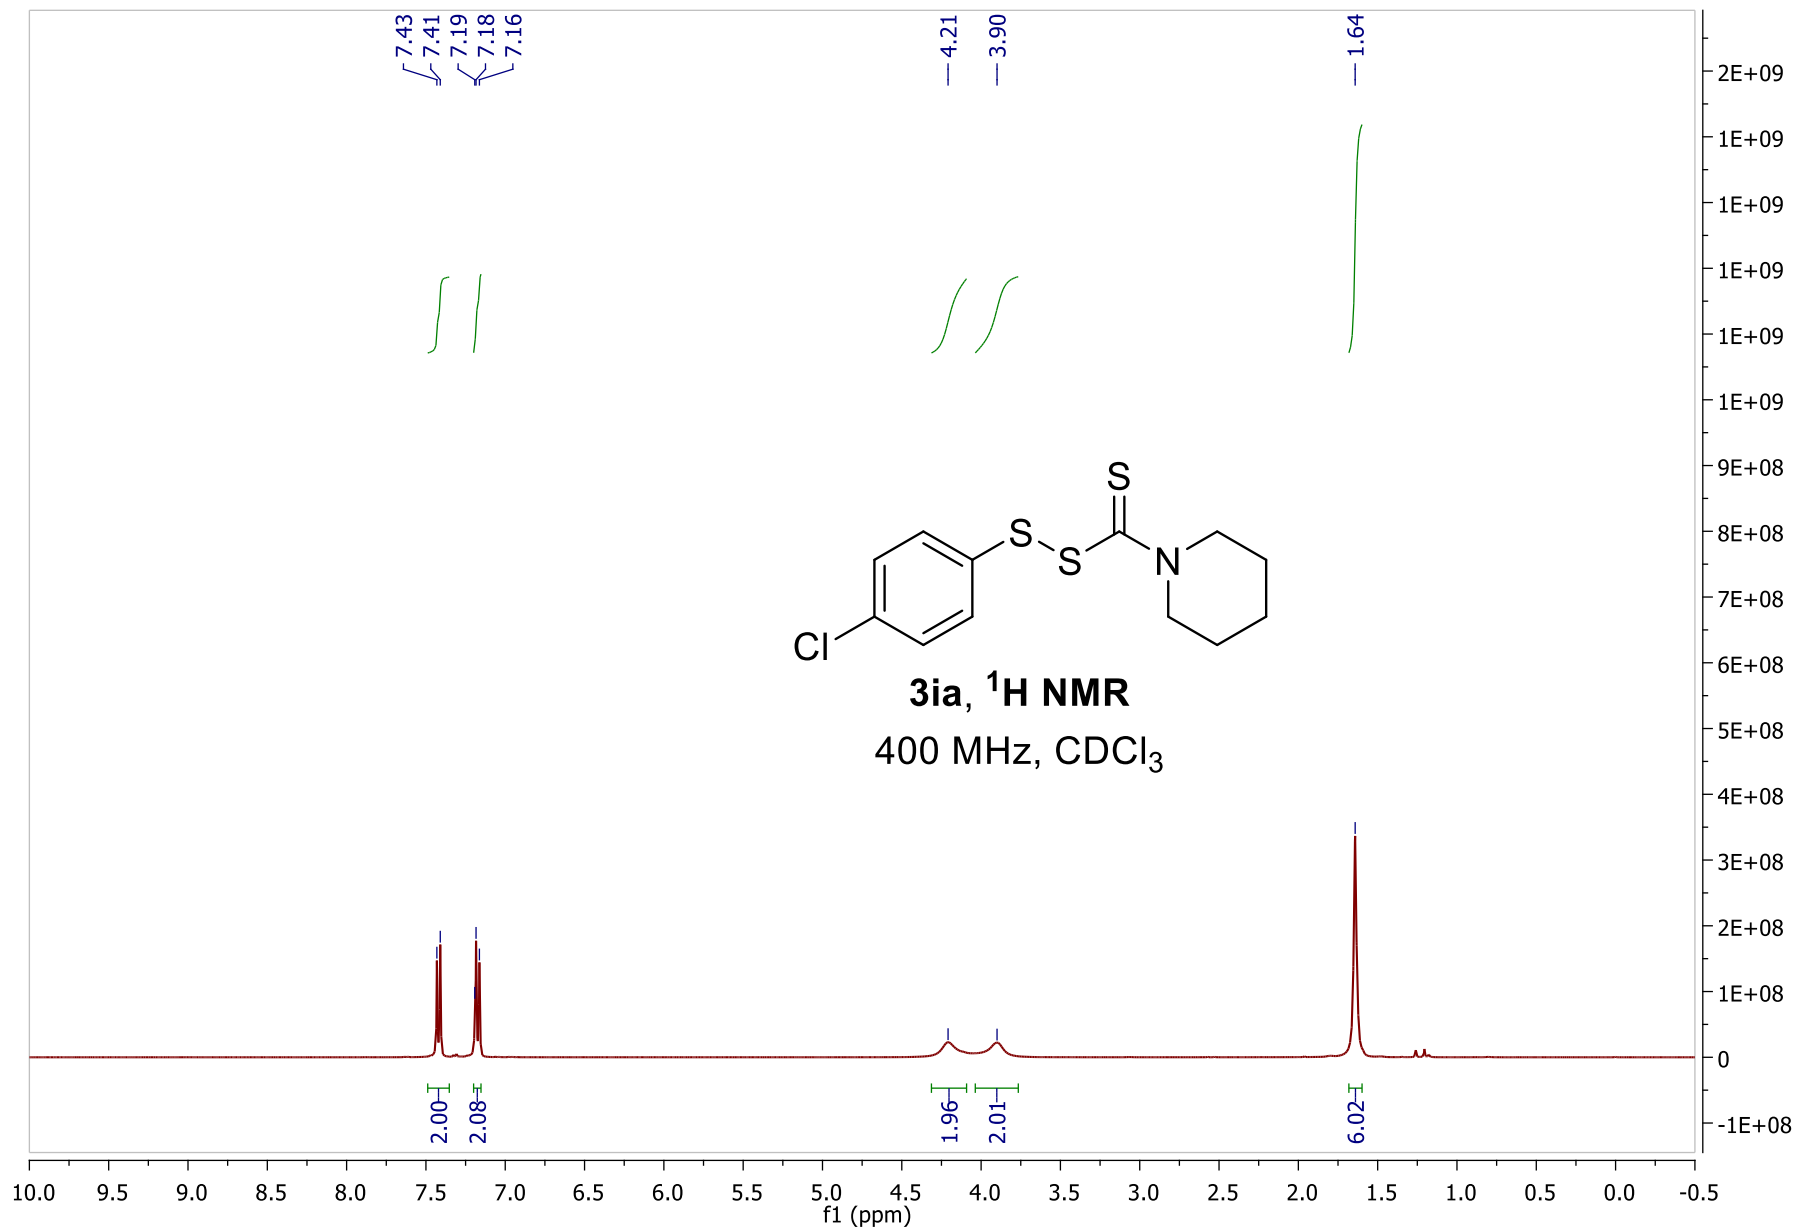

S37

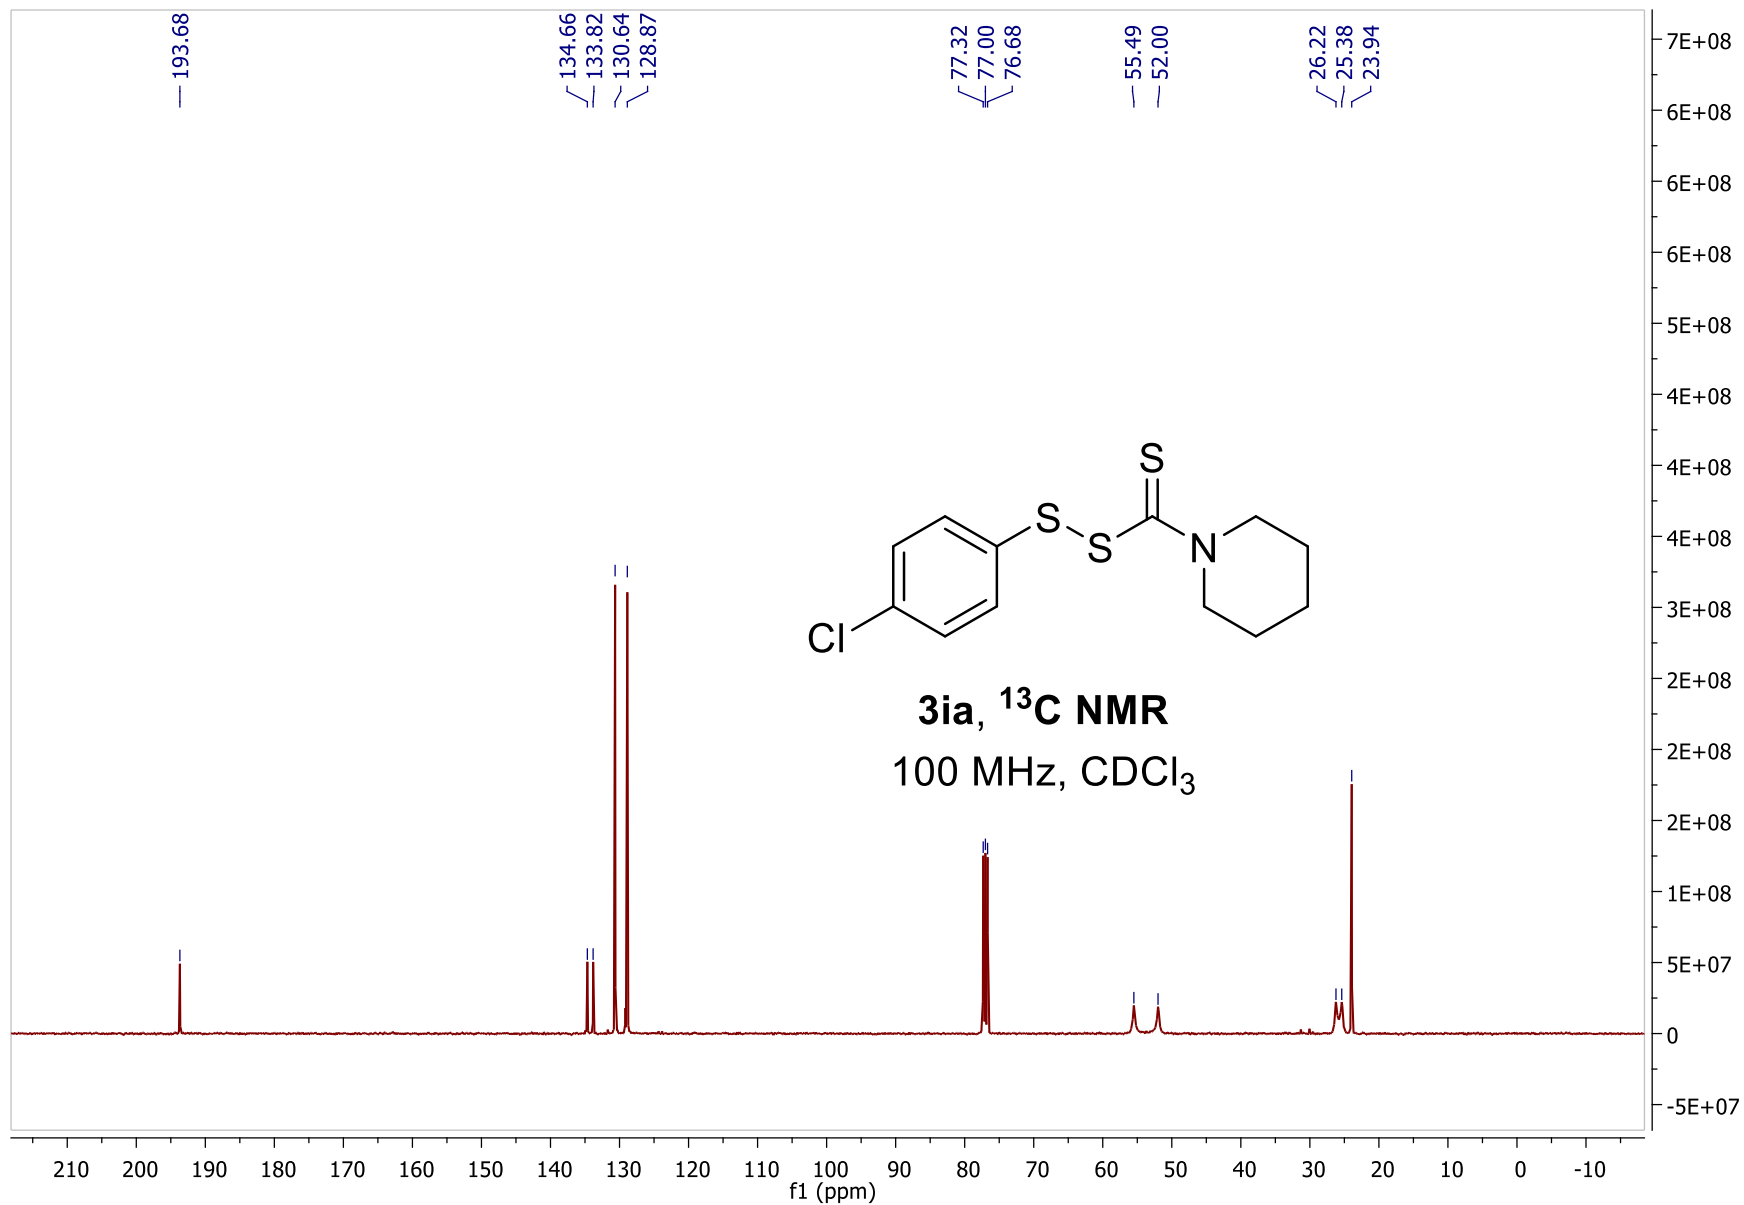

# Spectrum Plot Report

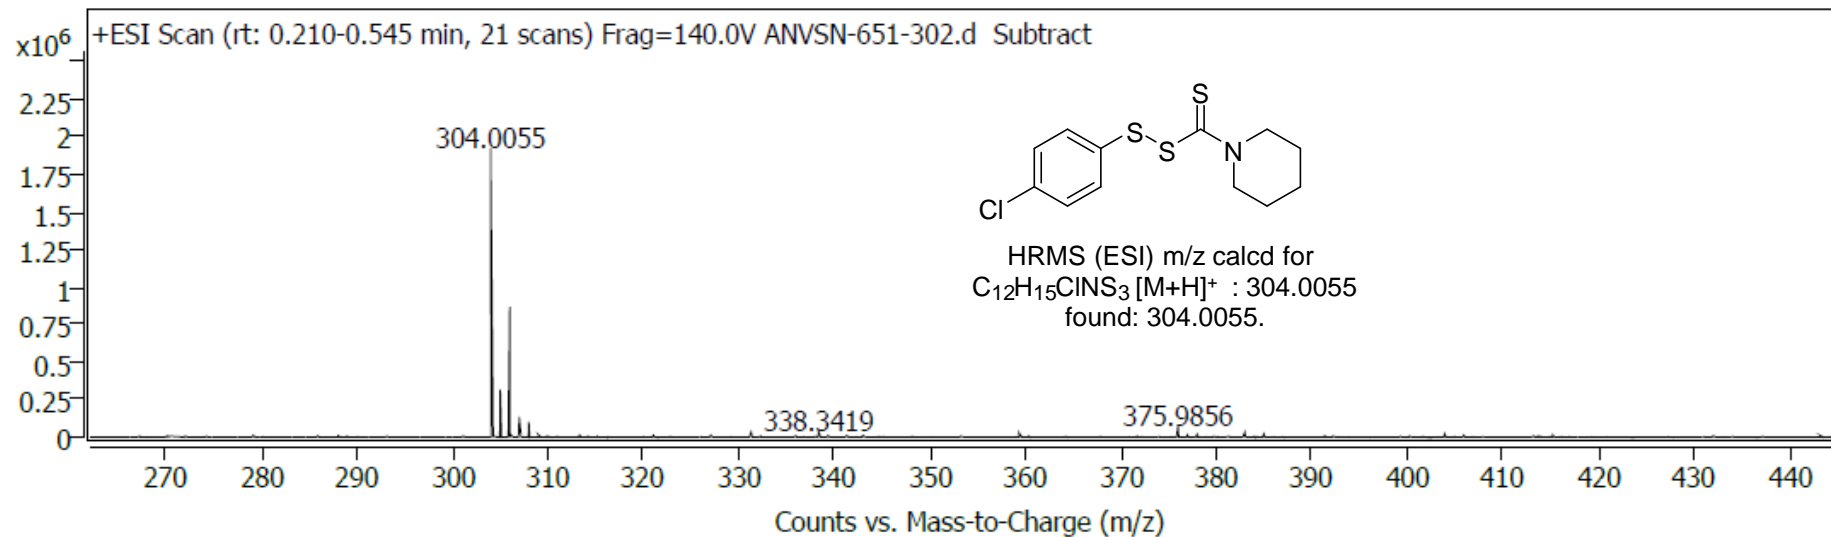

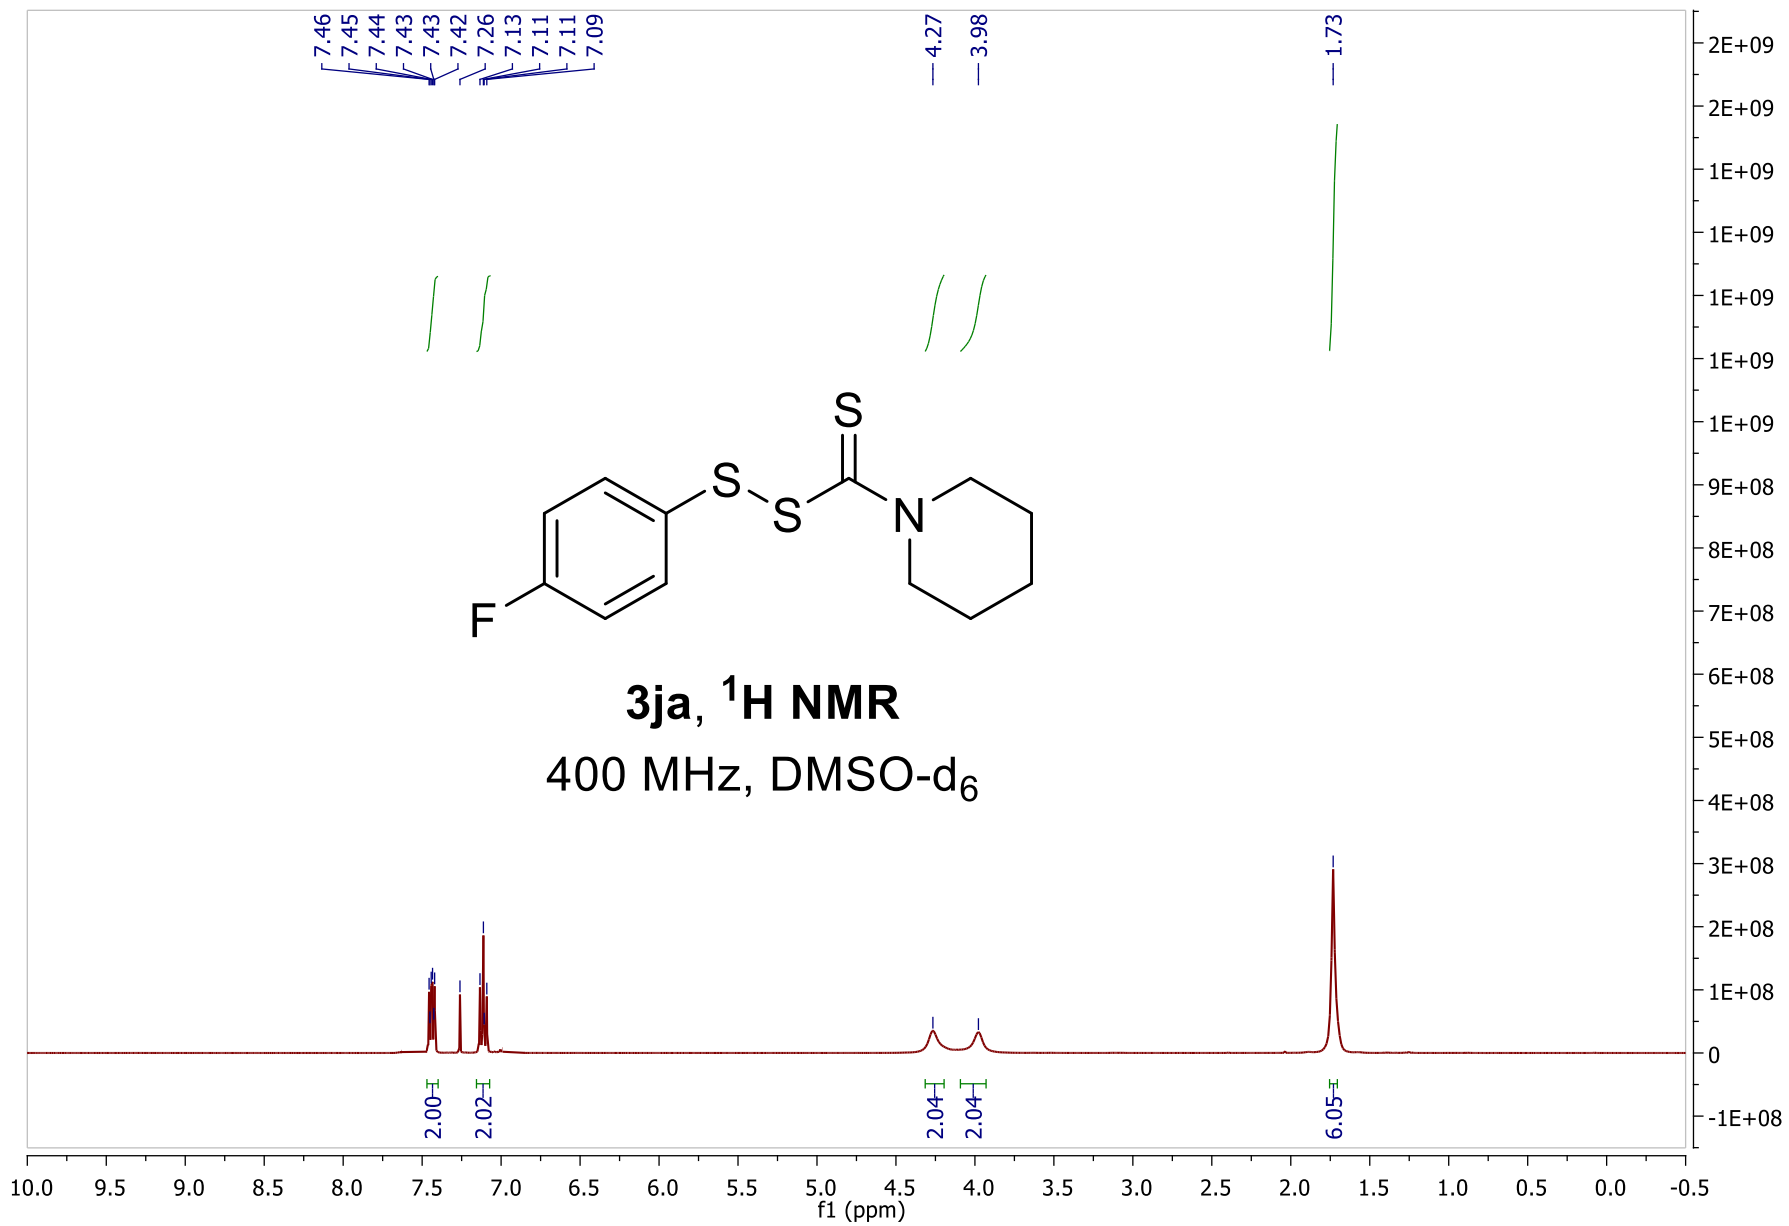

S40



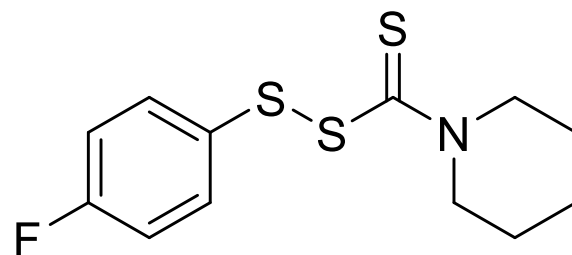

**3ja,  $^{13}\text{C}$  NMR**  
100 MHz, DMSO- $\text{d}_6$

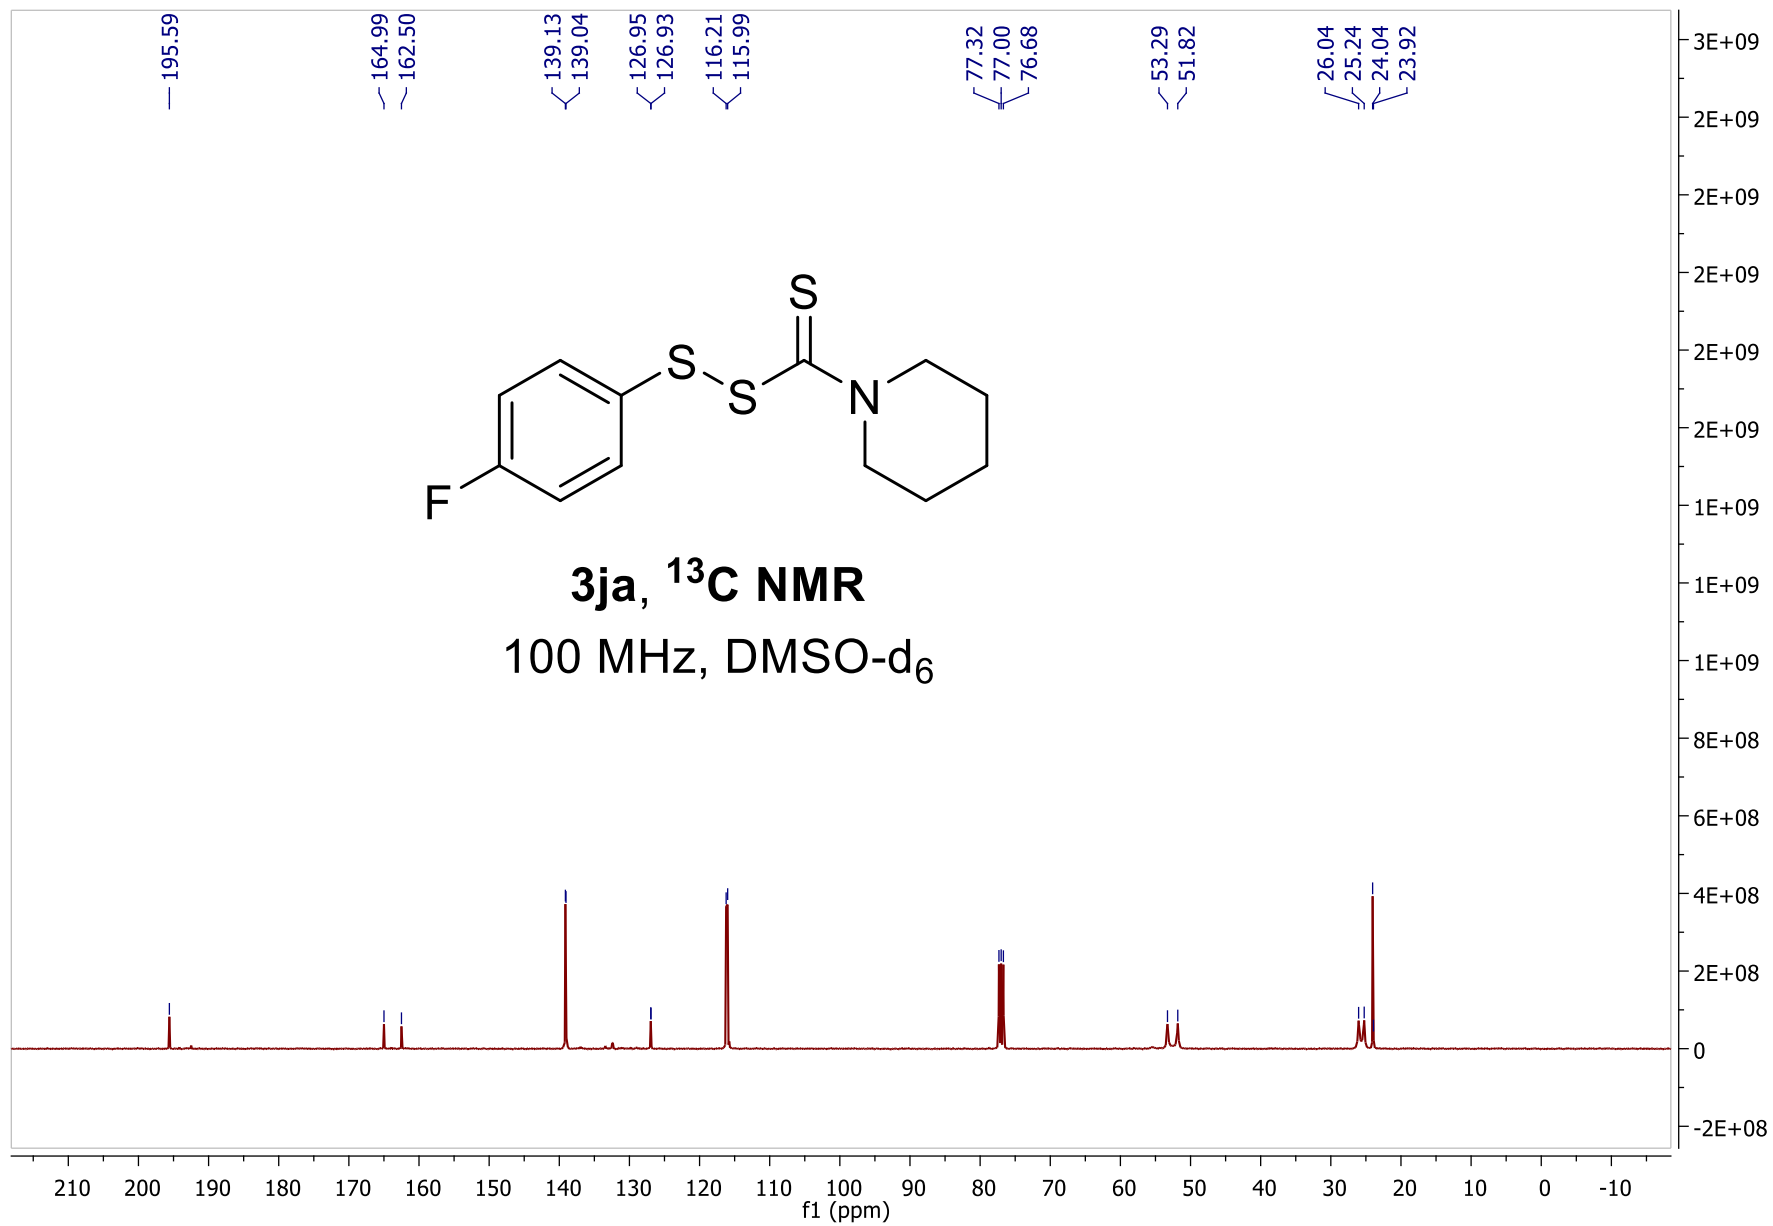

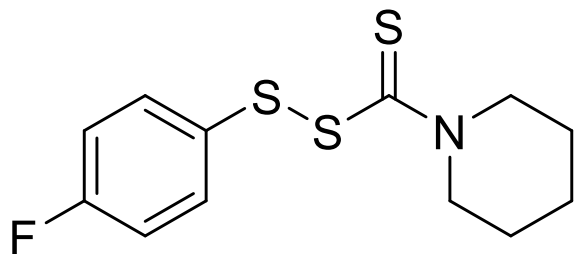

**3ja,  $^{19}\text{F}$  NMR**  
376 MHz, DMSO- $\text{d}_6$

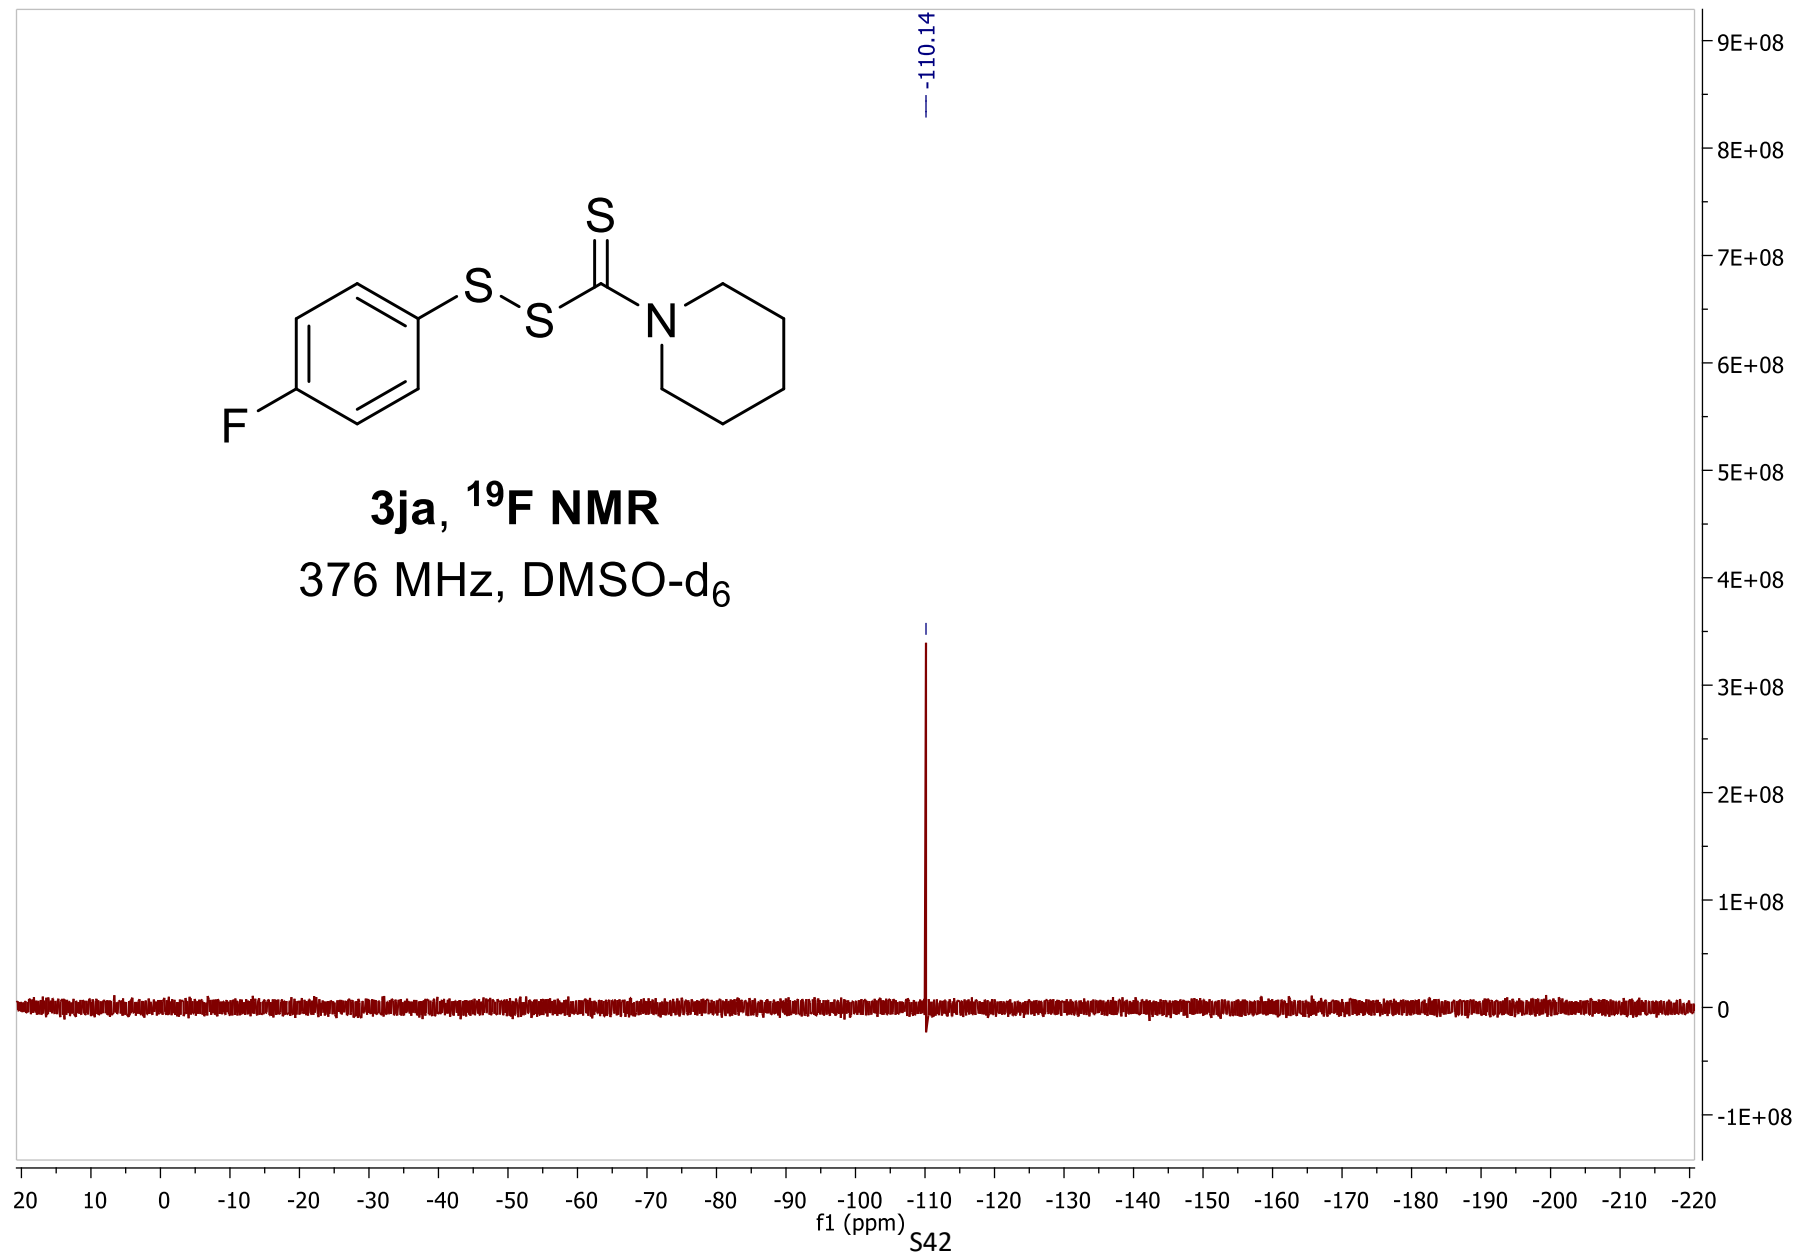

# Spectrum Plot Report

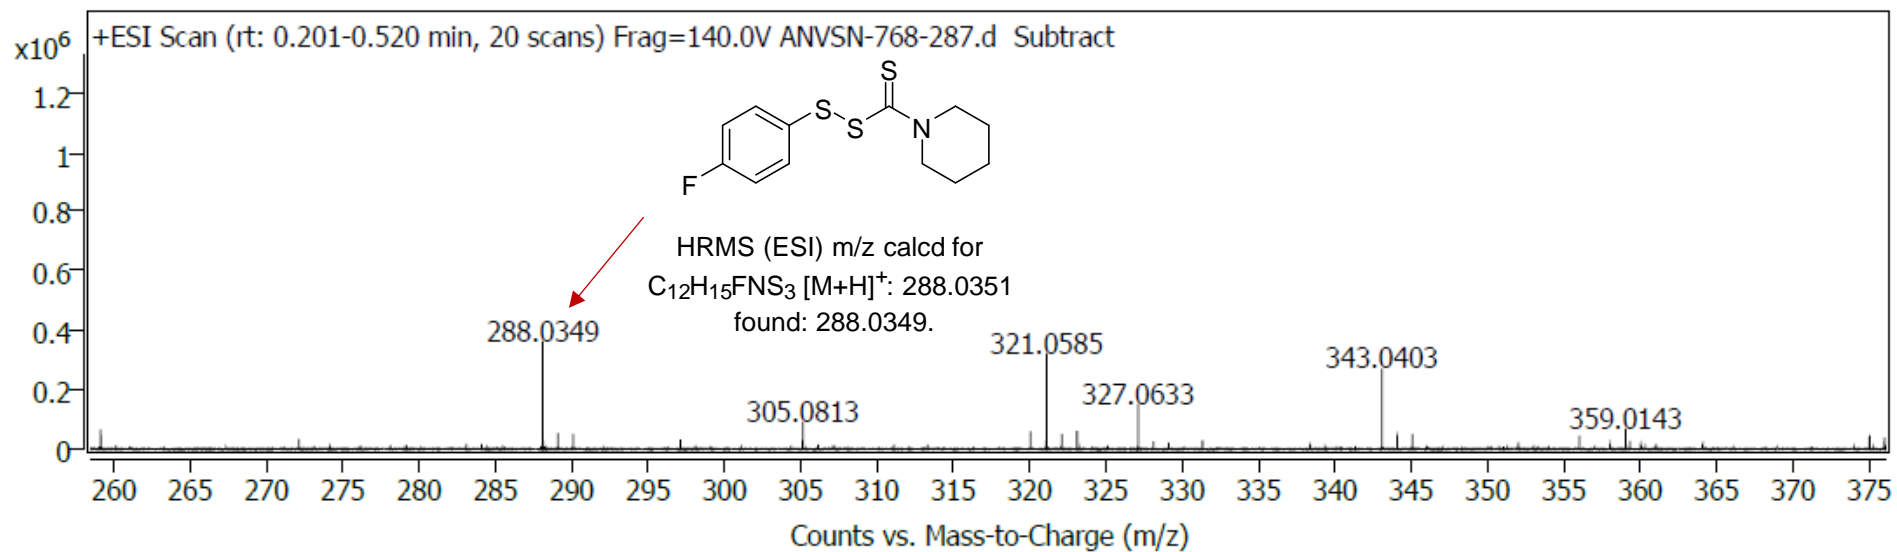

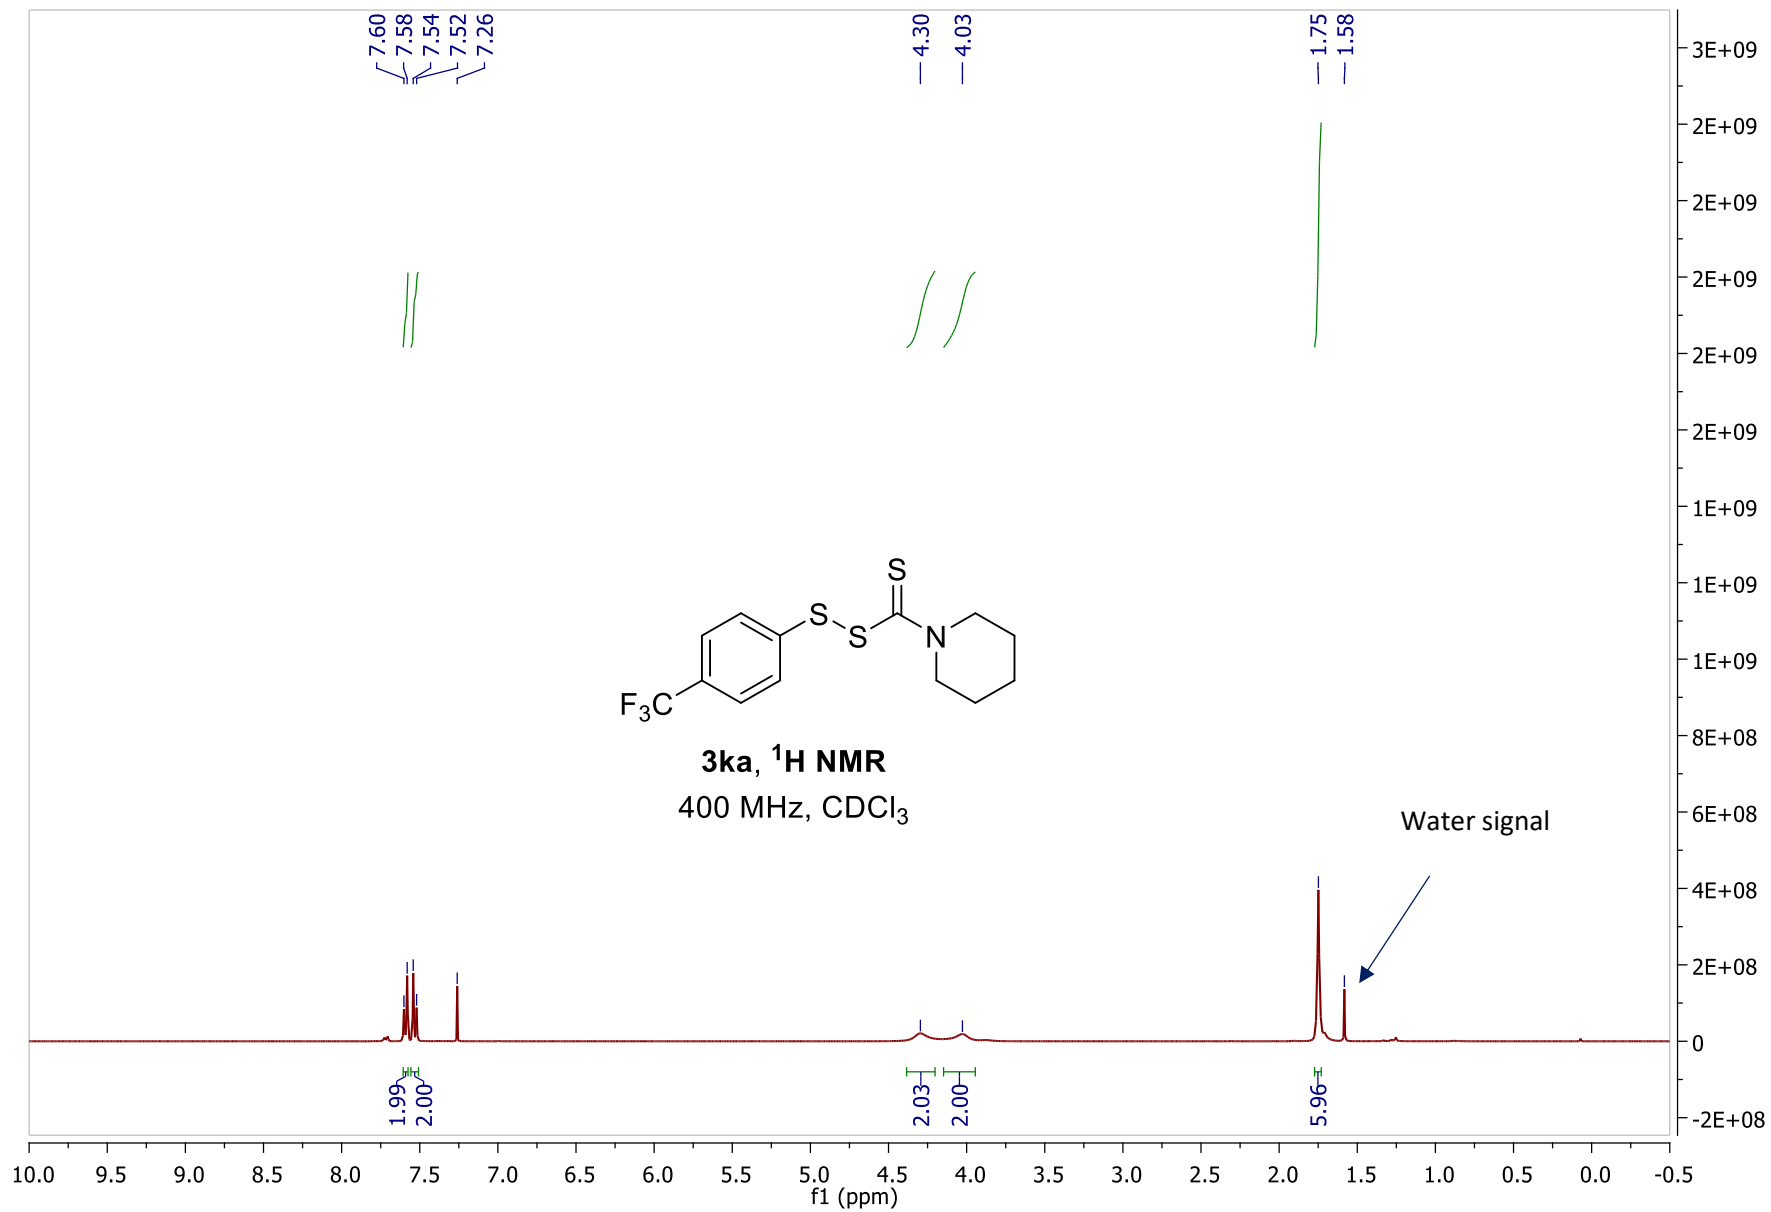

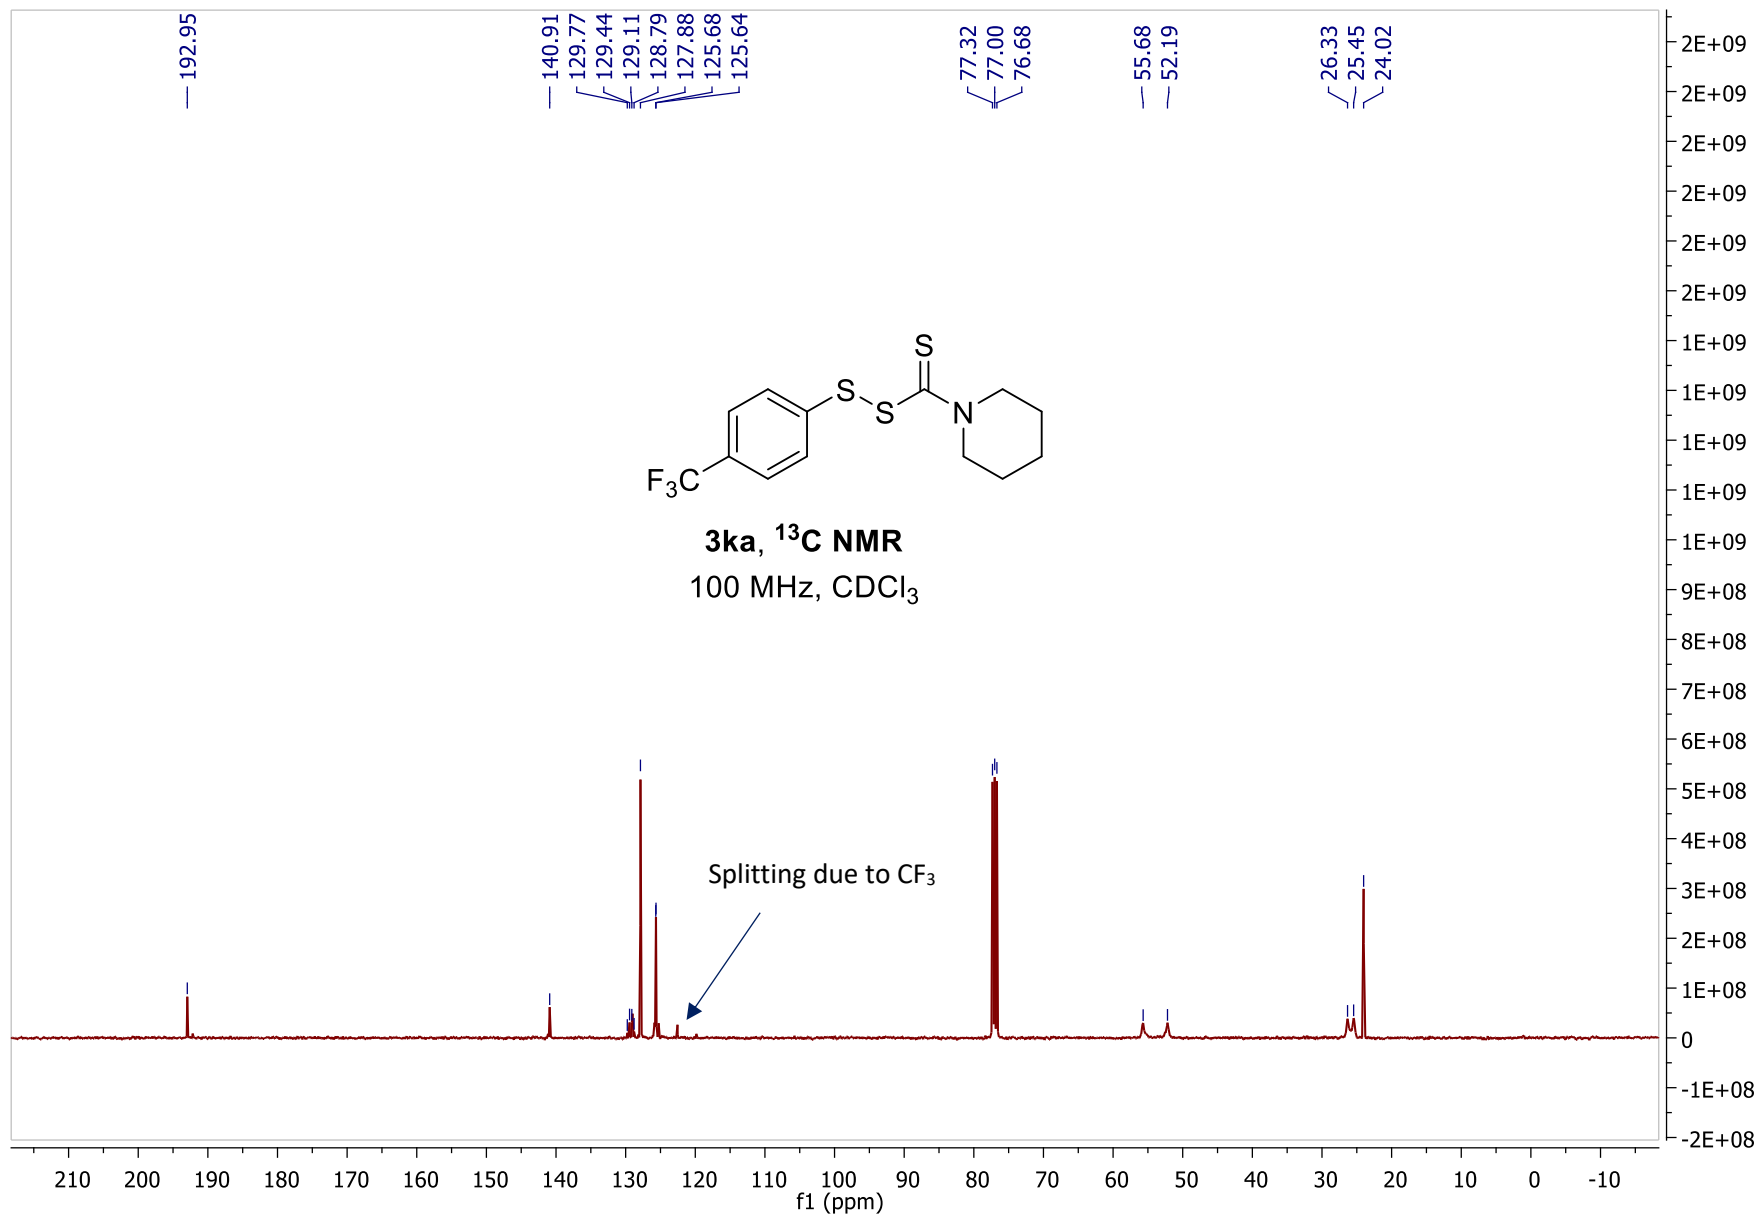

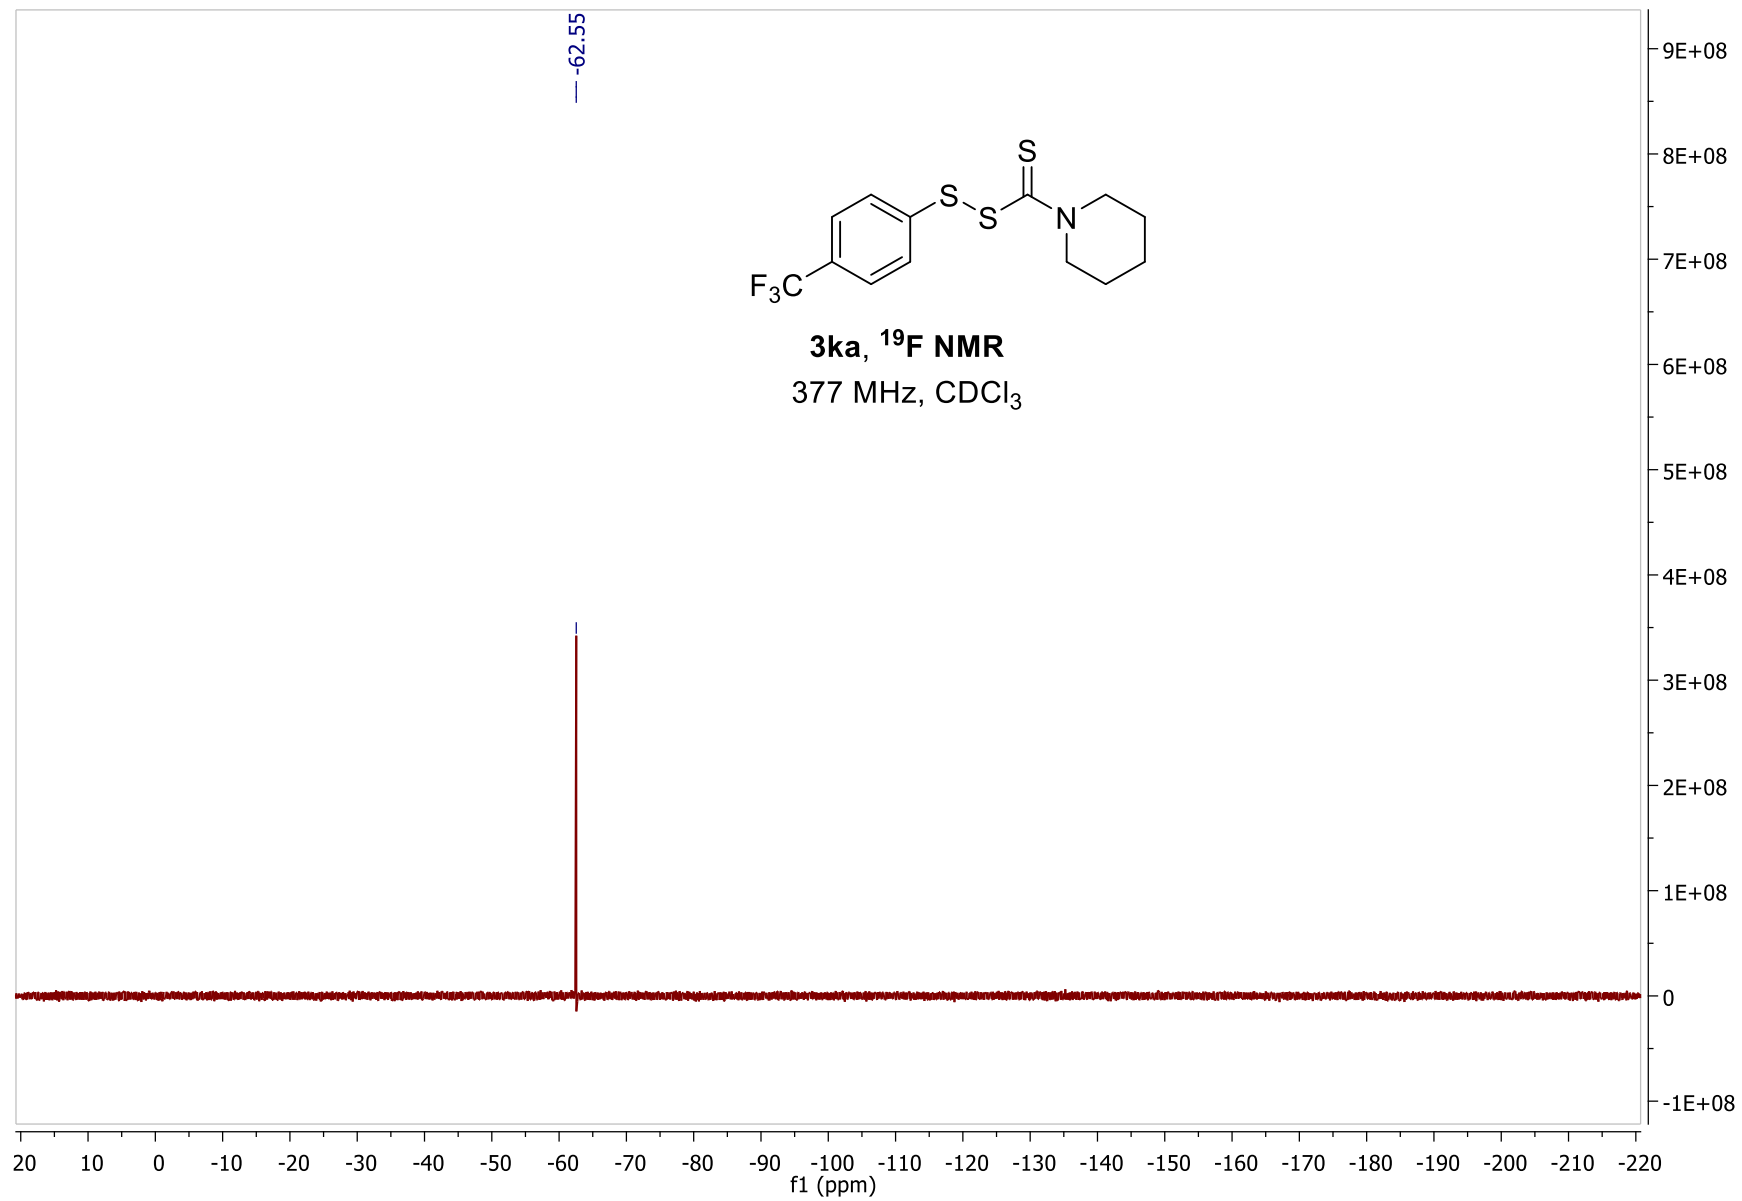

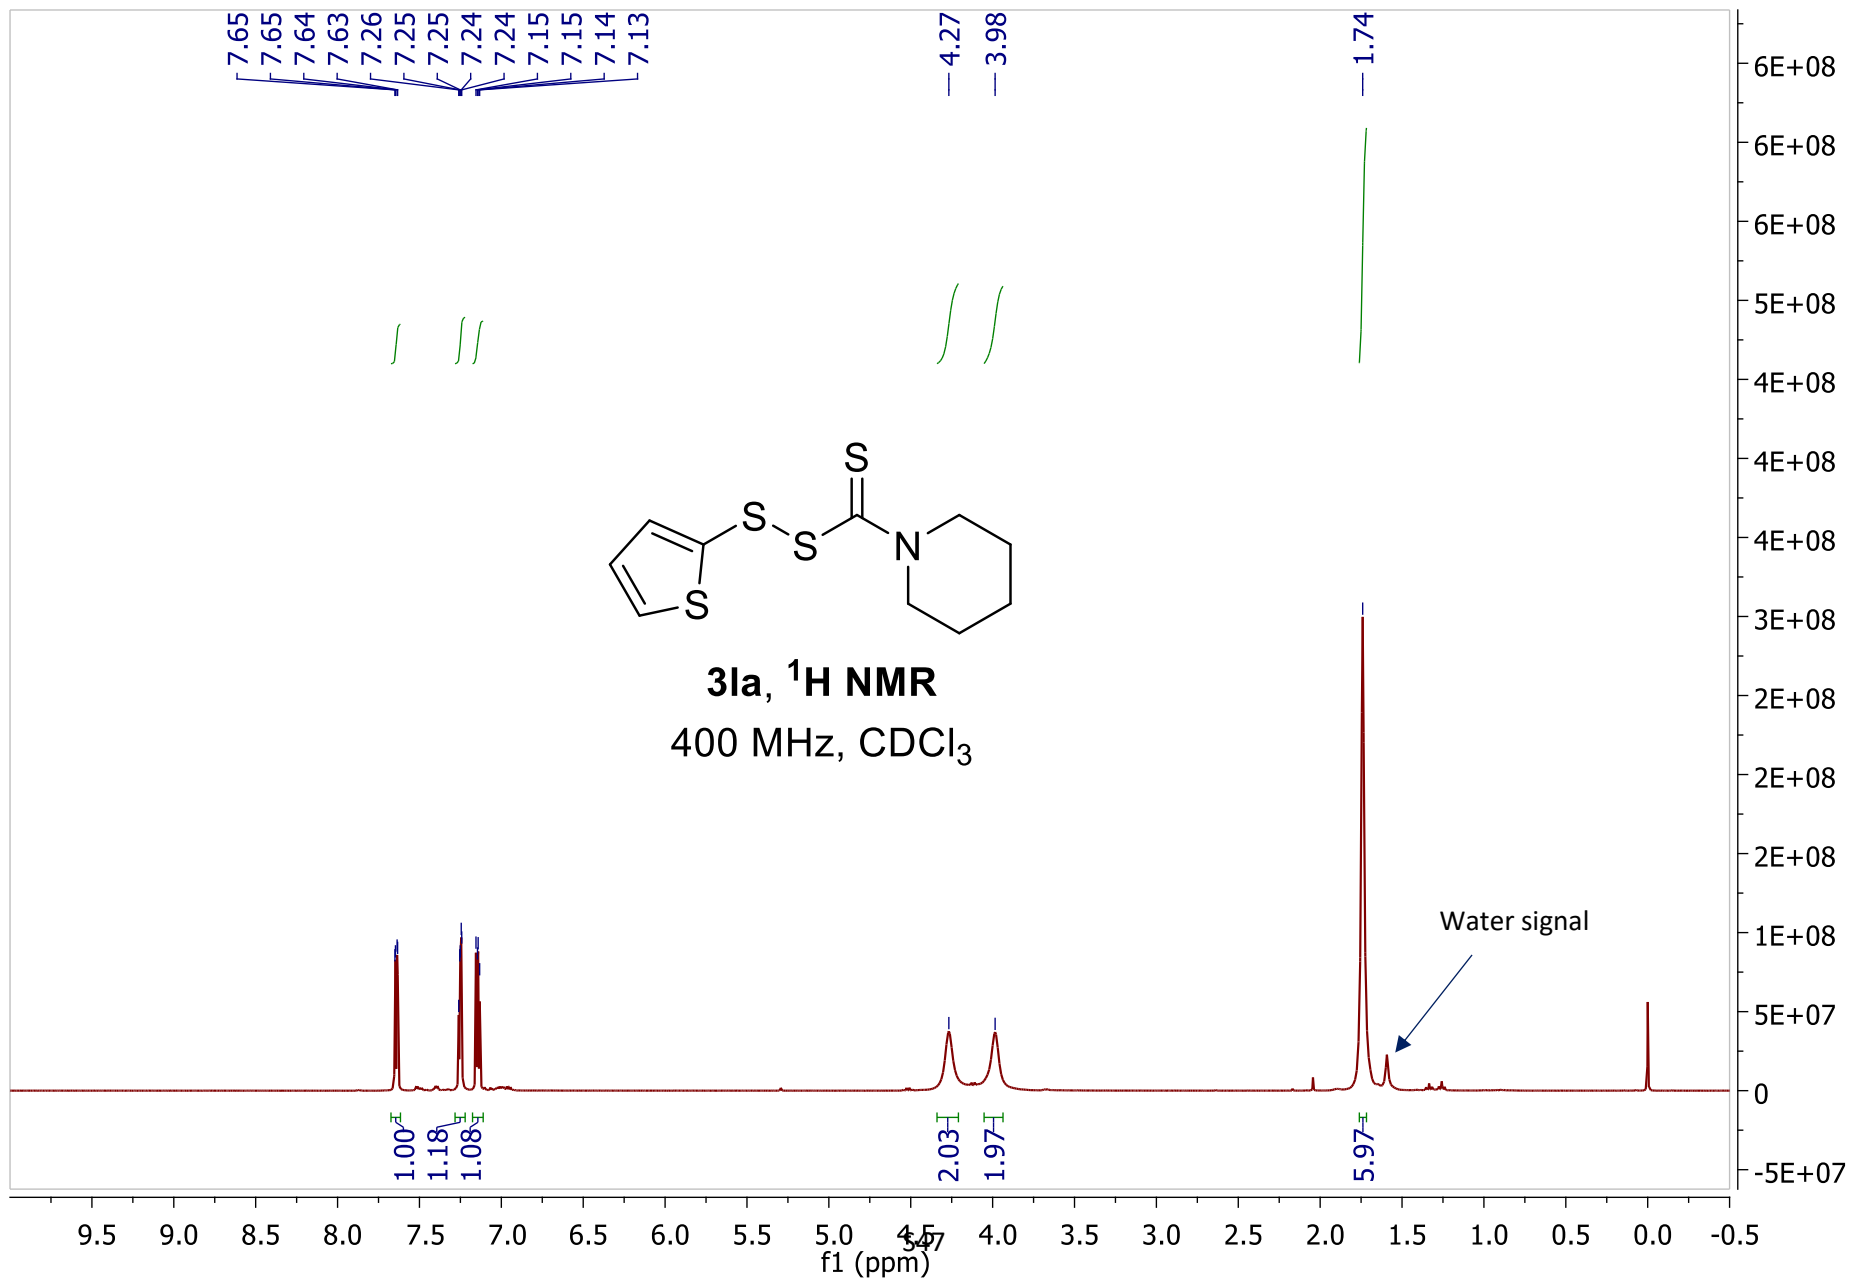

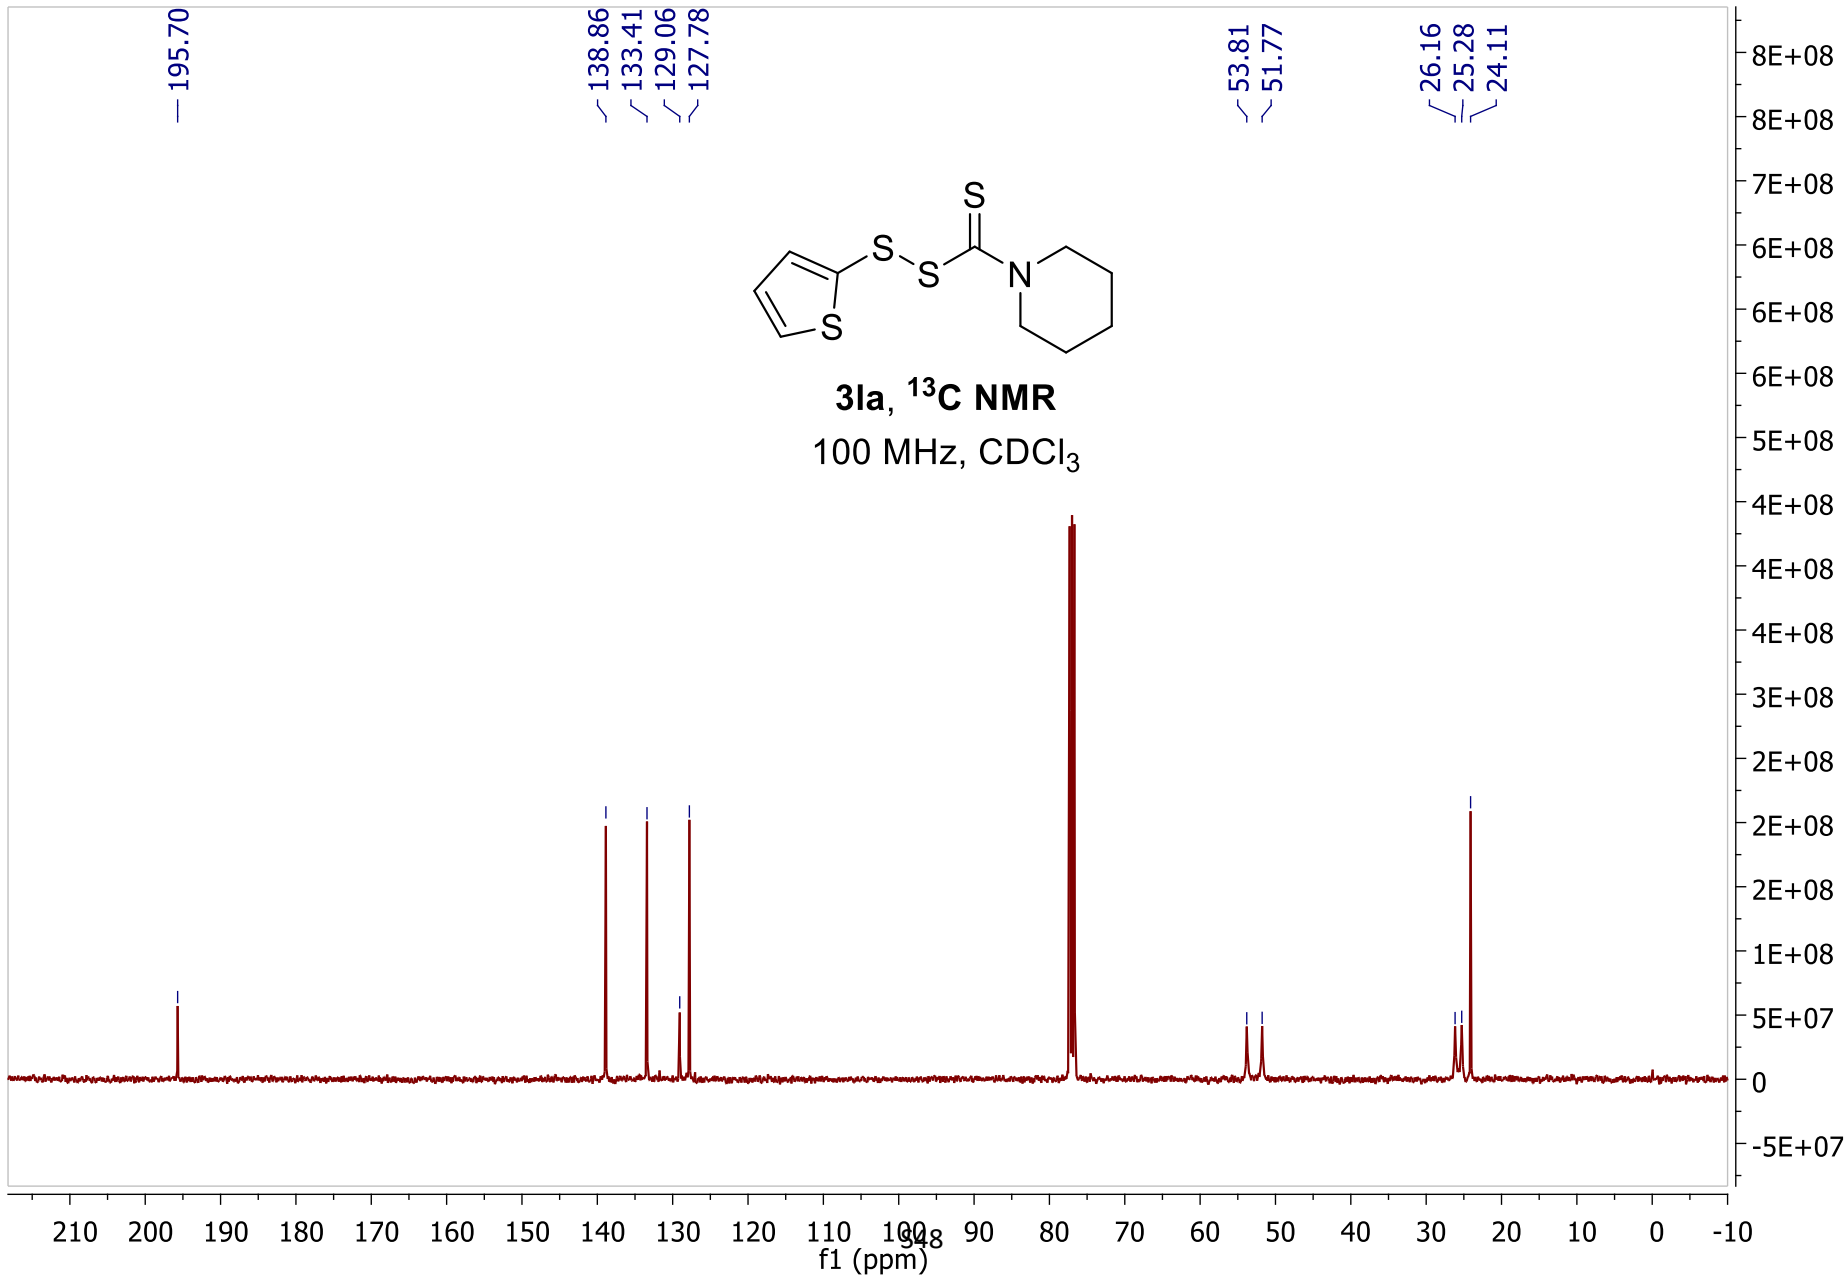



# Spectrum Plot Report

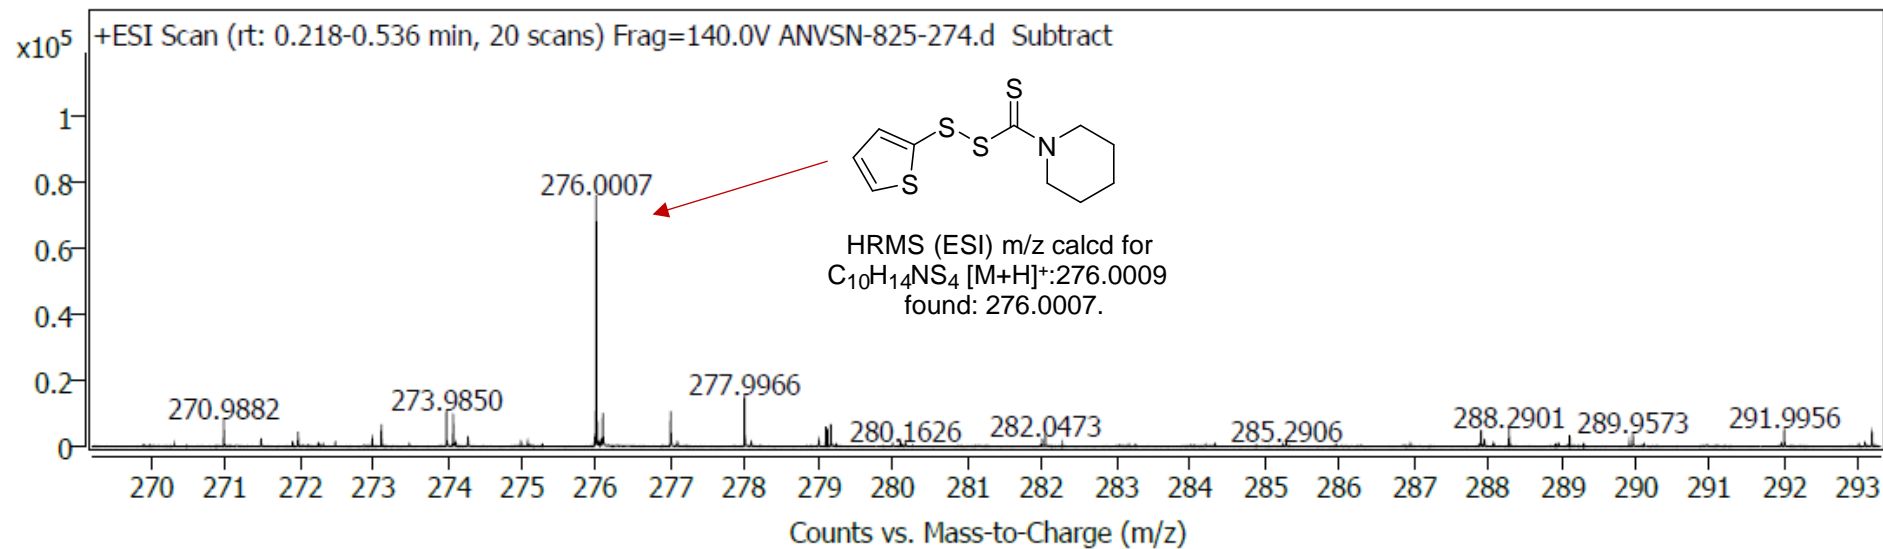

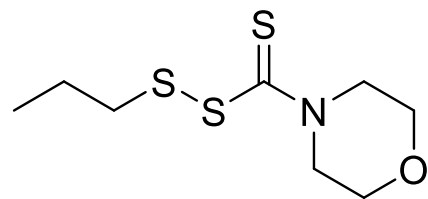

**3ab, <sup>1</sup>H NMR**  
400 MHz, DMSO-d<sub>6</sub>

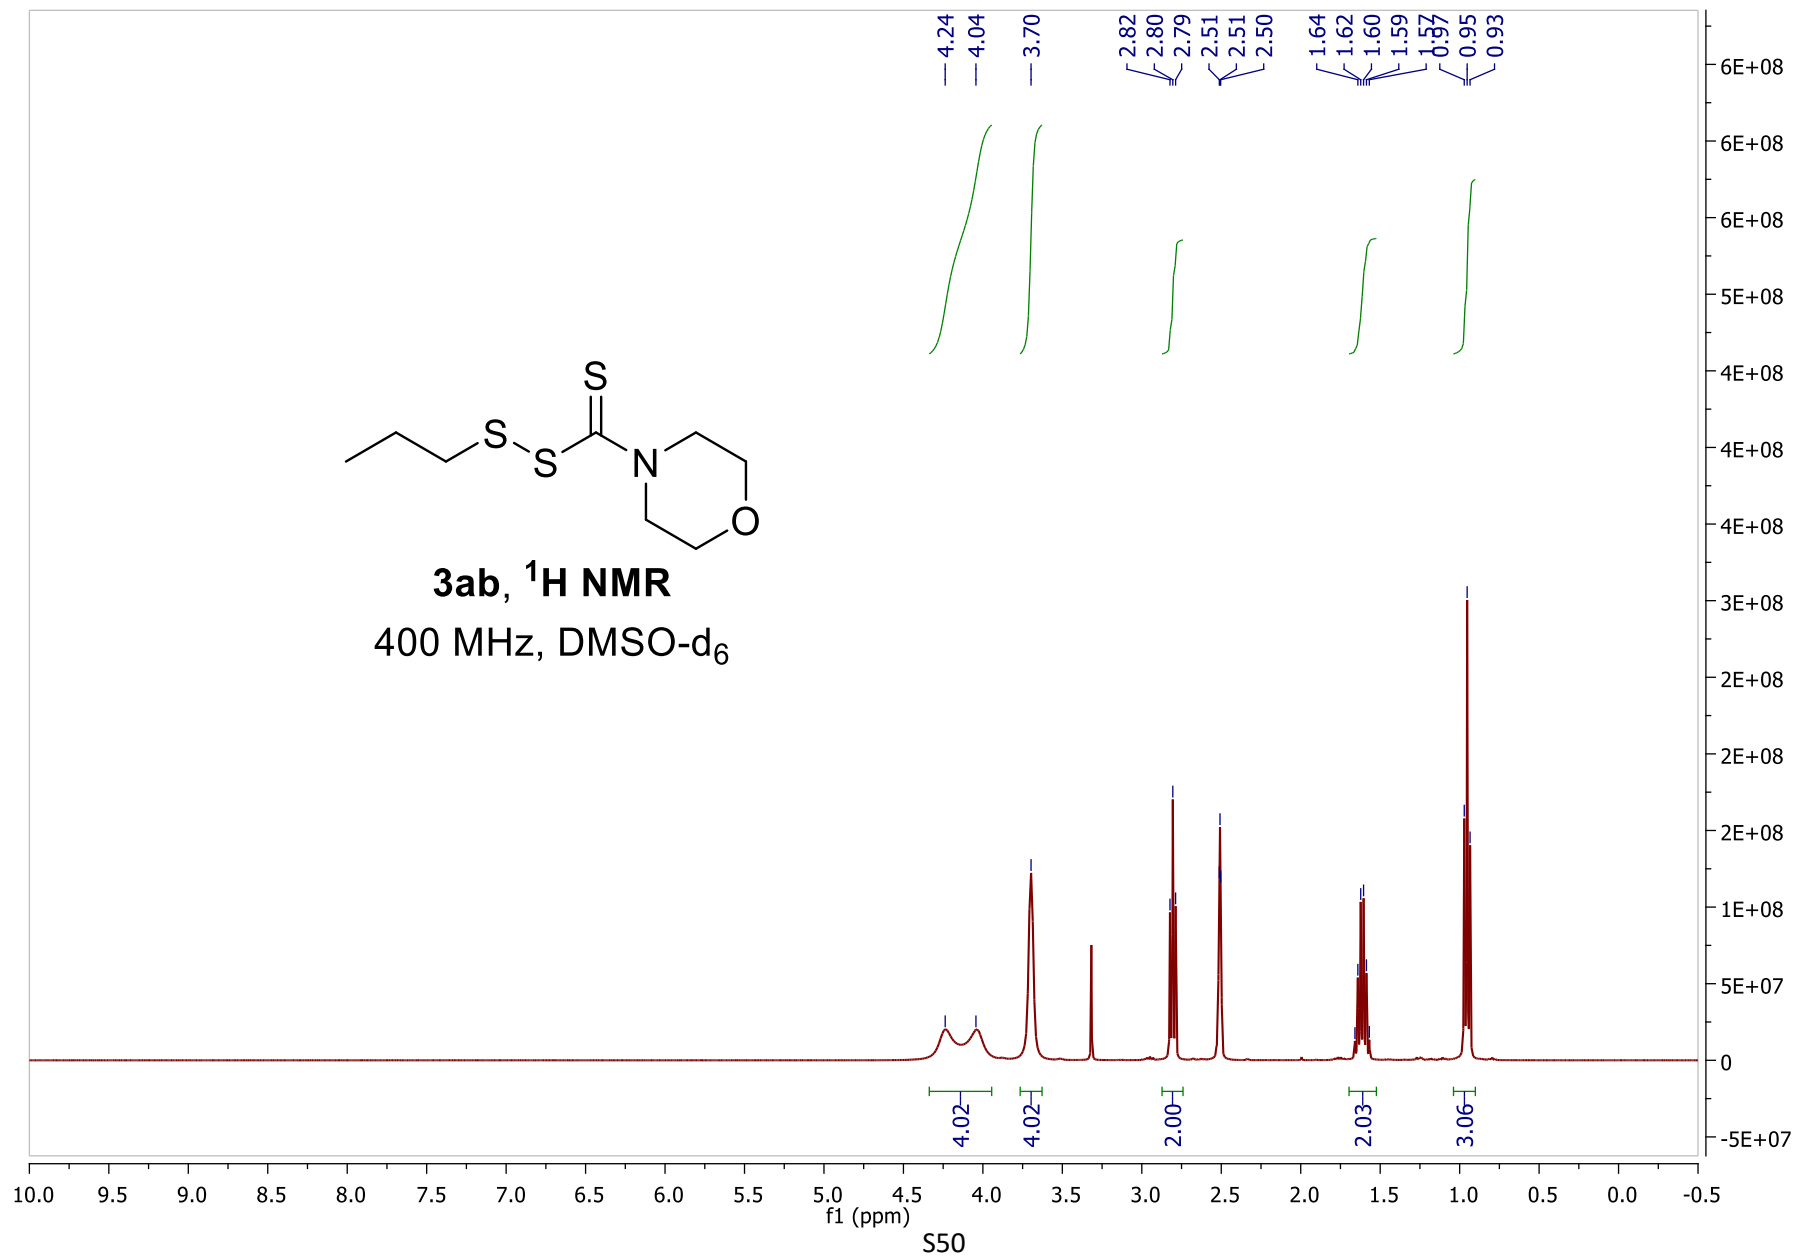

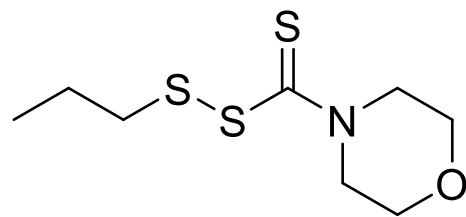

**3ab, <sup>13</sup>C NMR**  
100 MHz, DMSO-d<sub>6</sub>

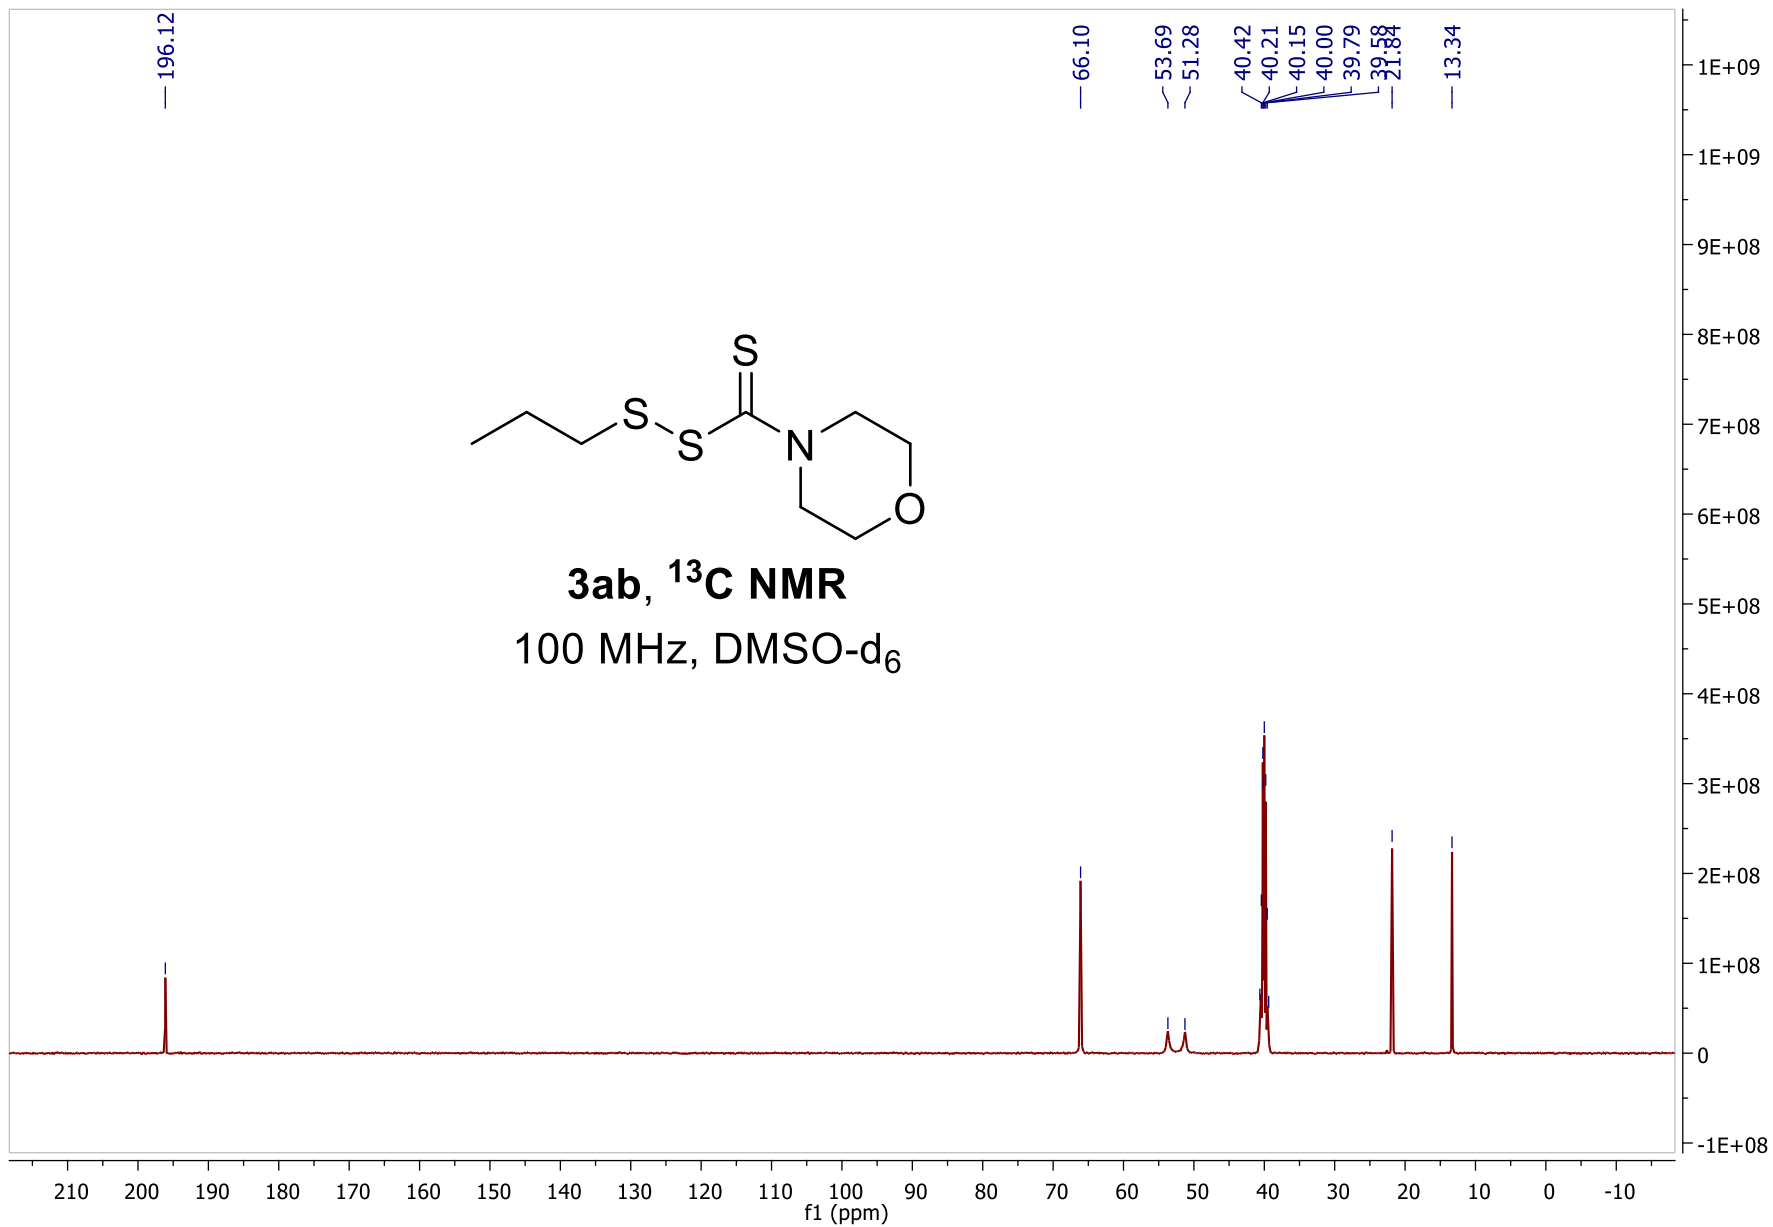

# Spectrum Plot Report

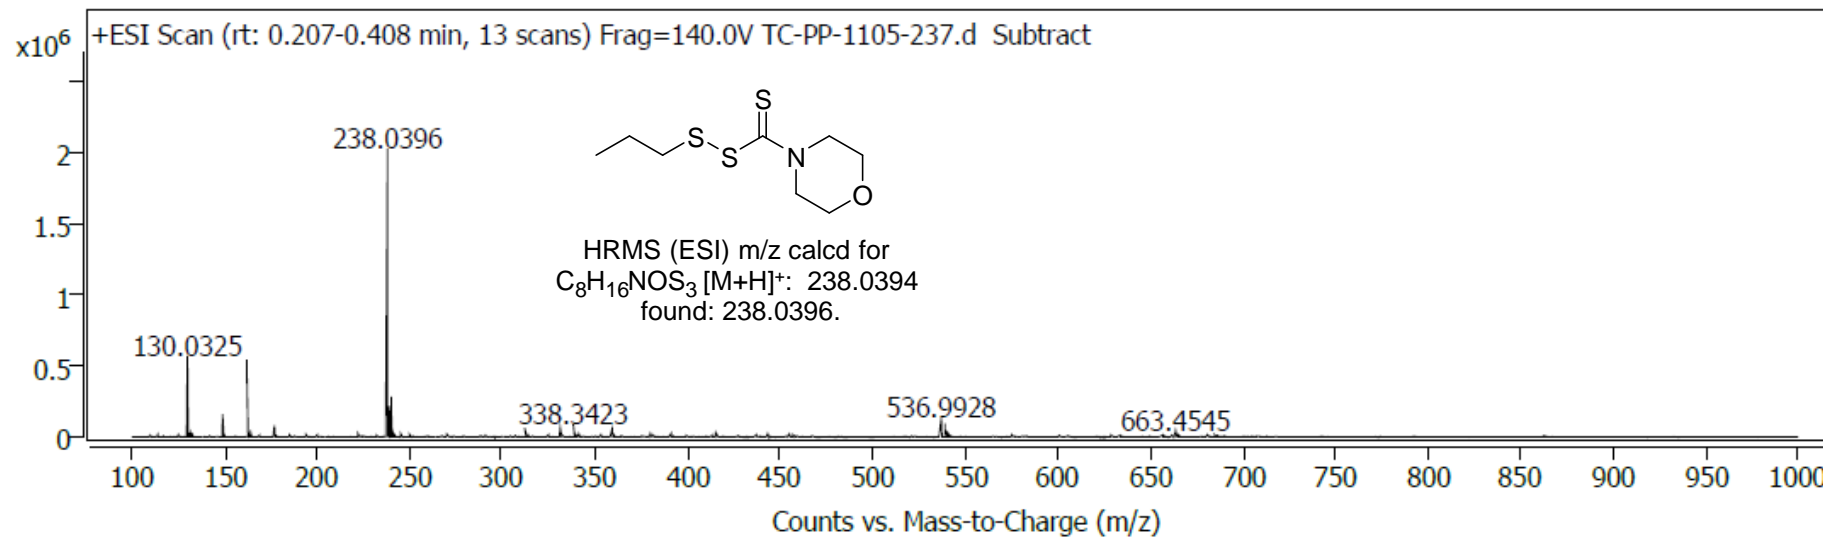

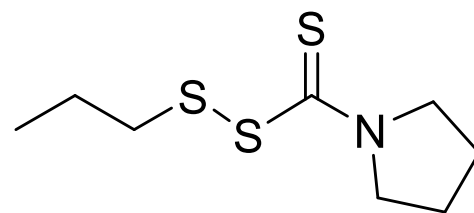

**3ac, <sup>1</sup>H NMR**  
400 MHz, CDCl<sub>3</sub>

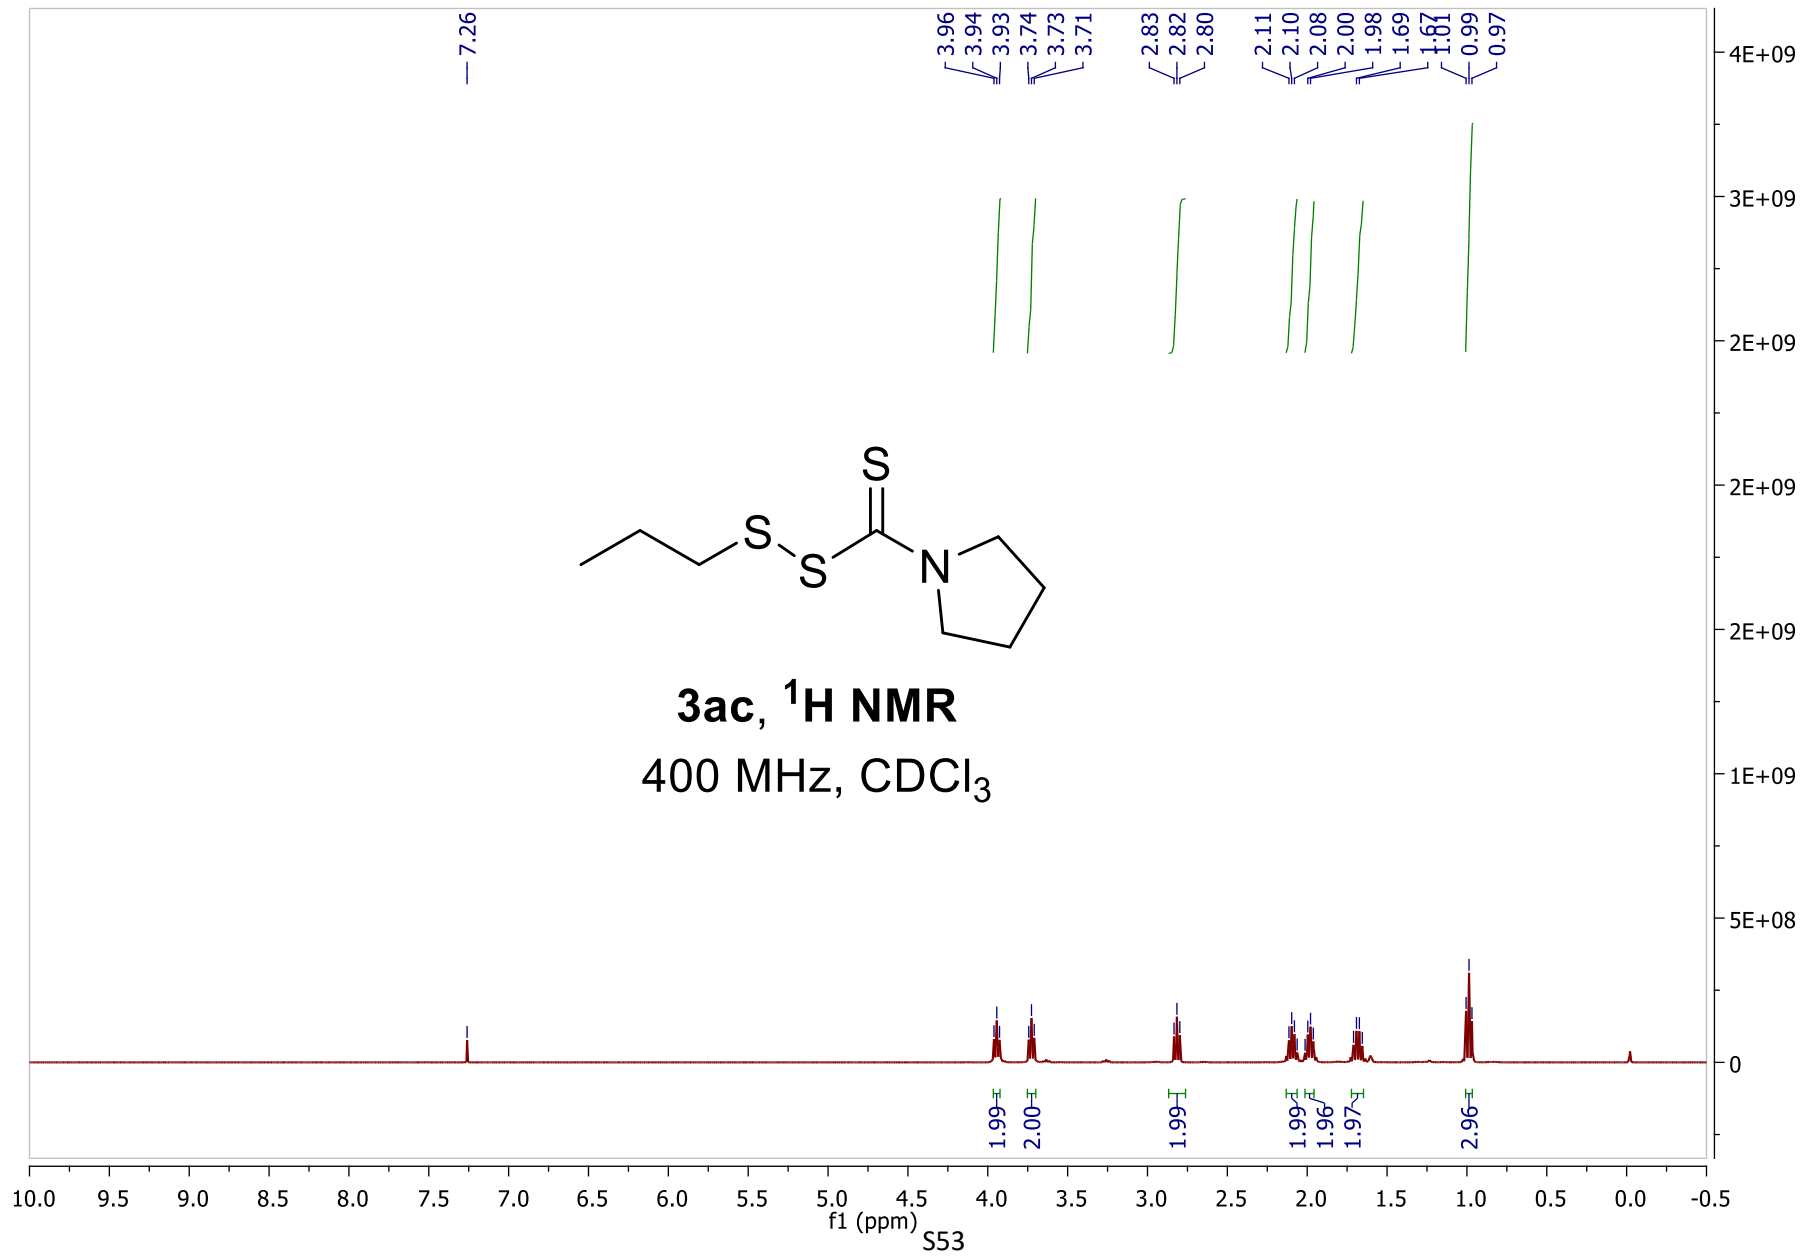

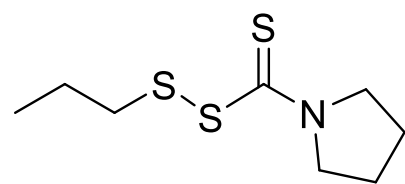

**3ac, <sup>13</sup>C NMR**  
100 MHz, CDCl<sub>3</sub>

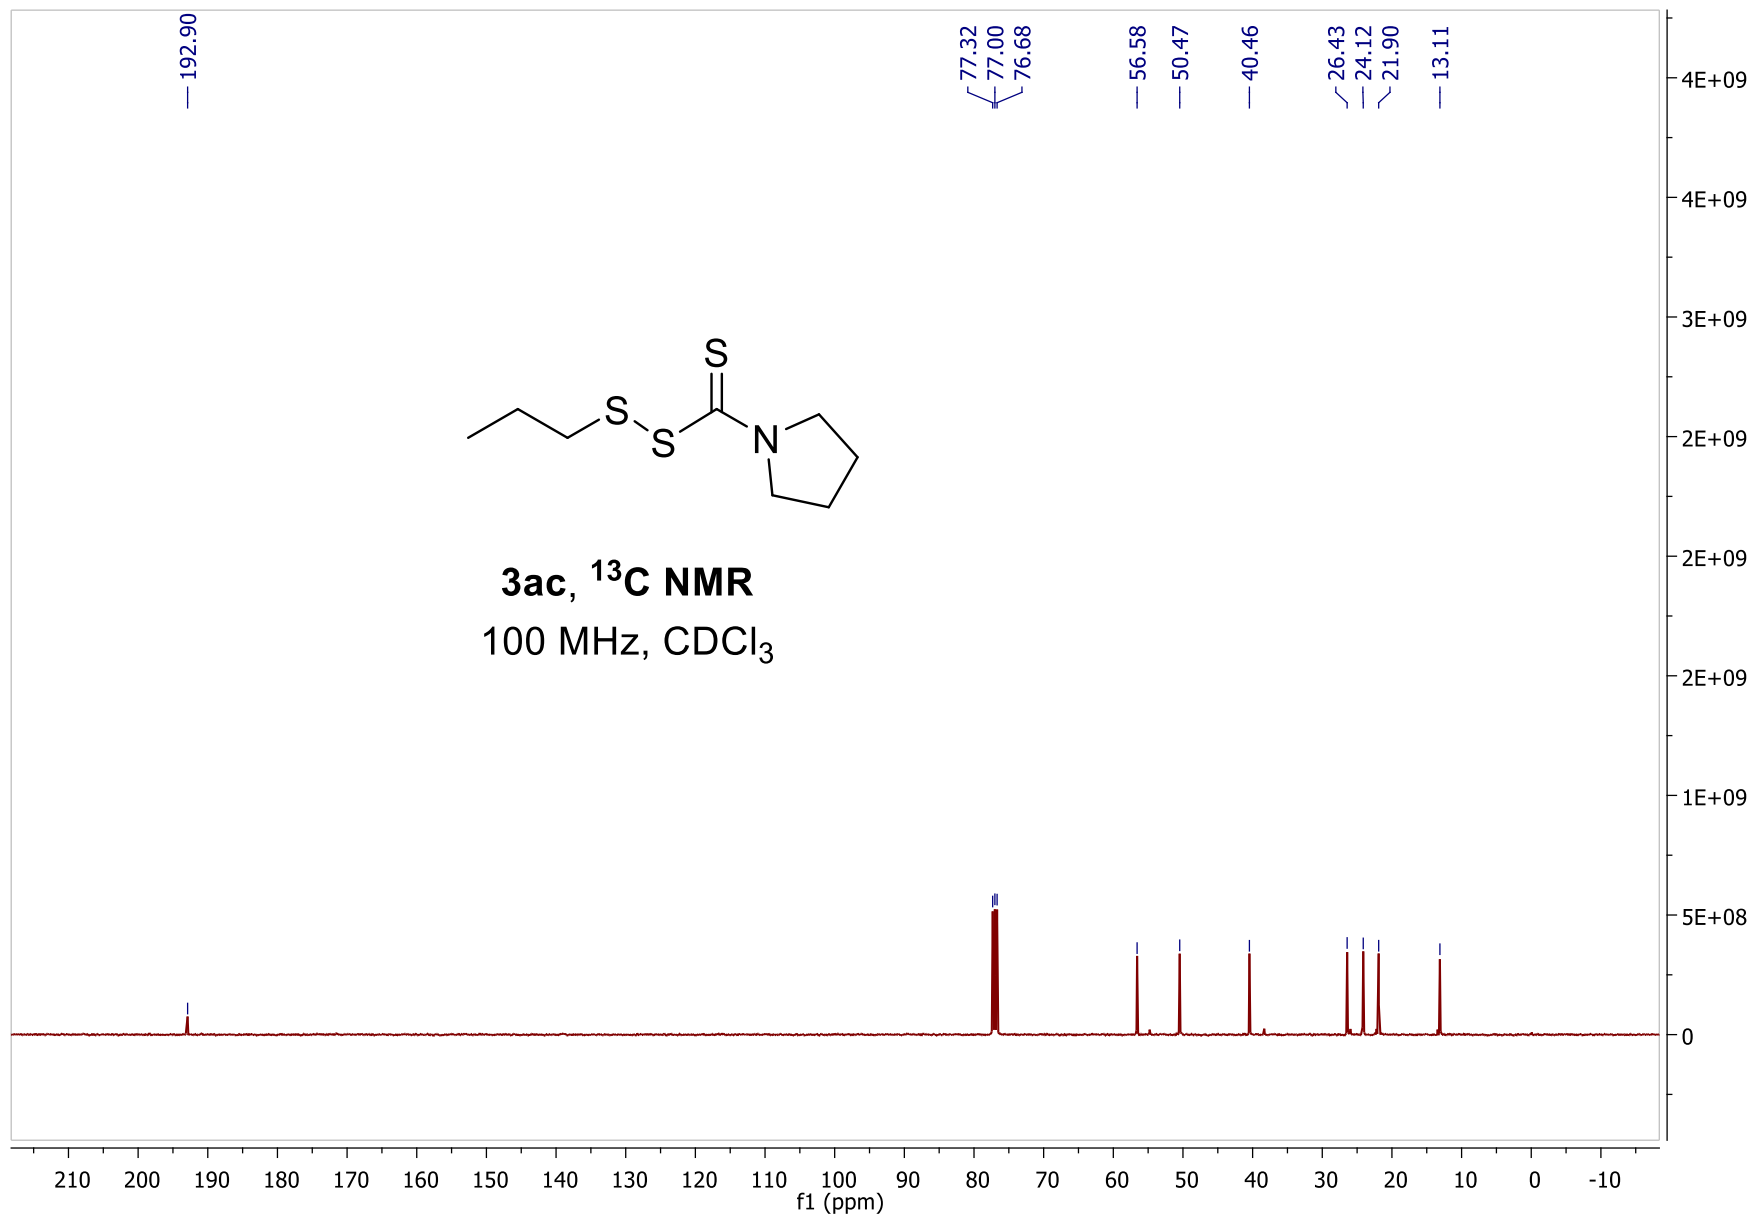

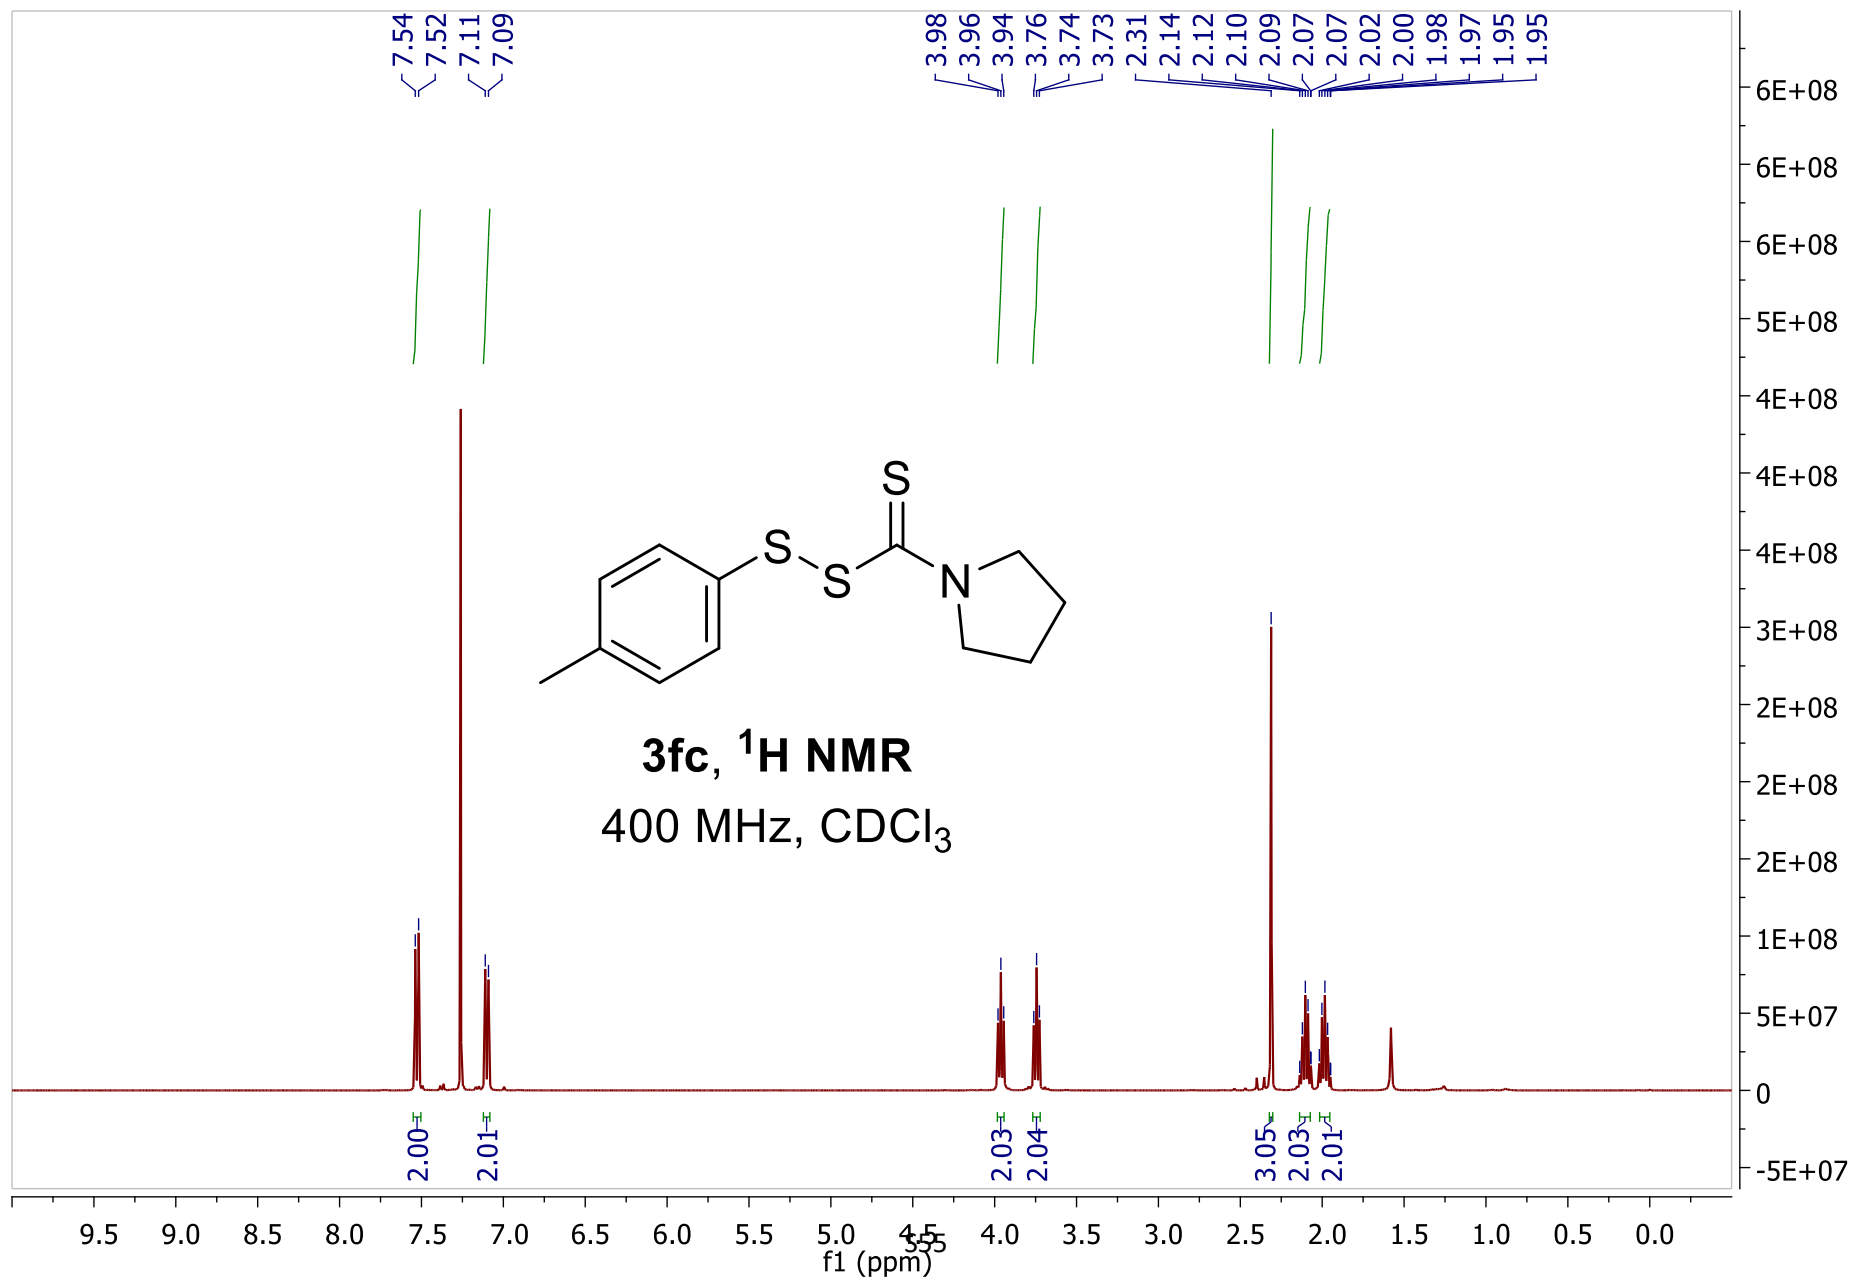

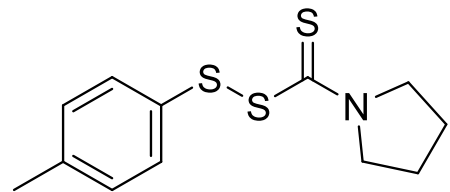

**3fc, <sup>13</sup>C NMR**  
100 MHz, CDCl<sub>3</sub>

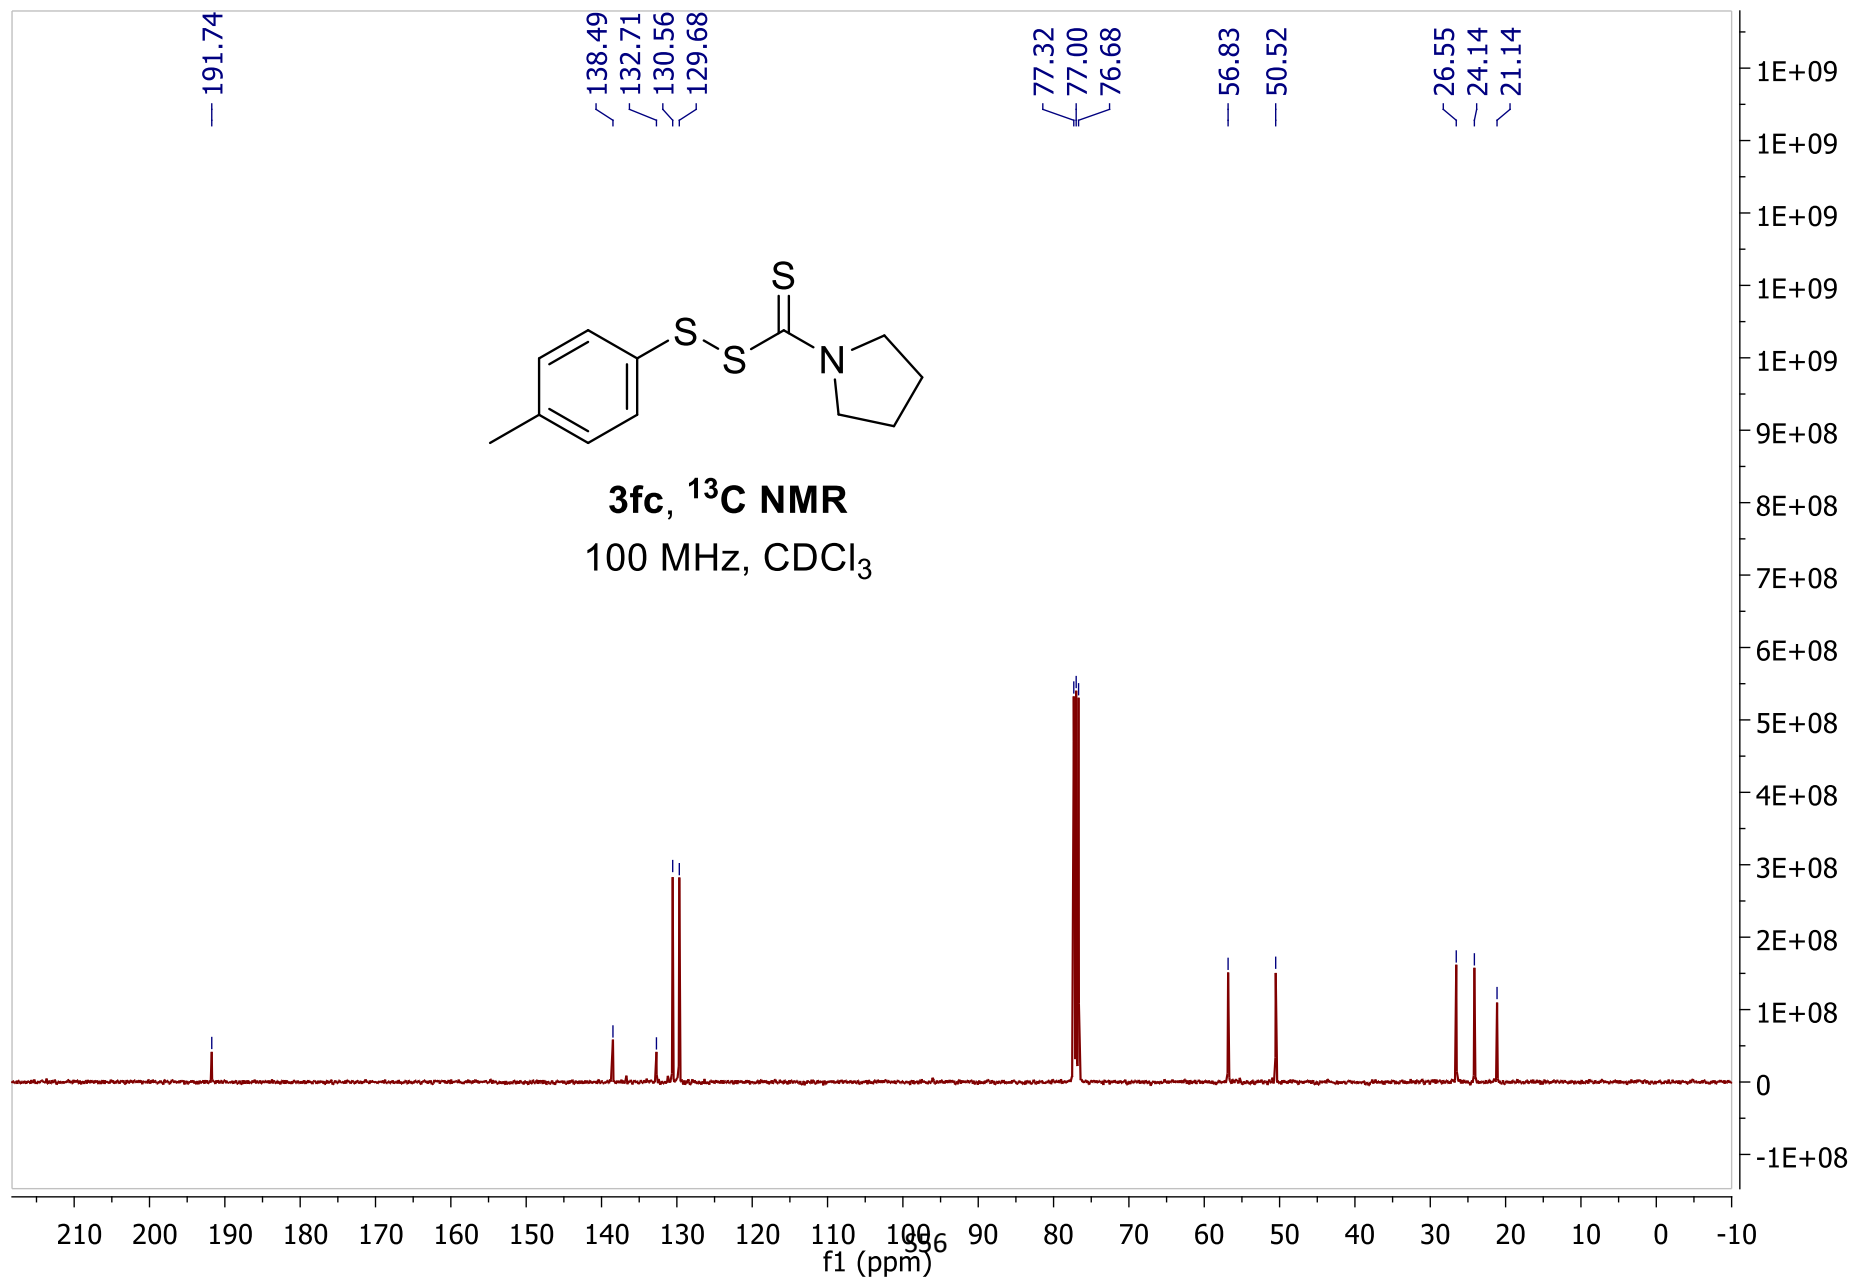



# Spectrum Plot Report

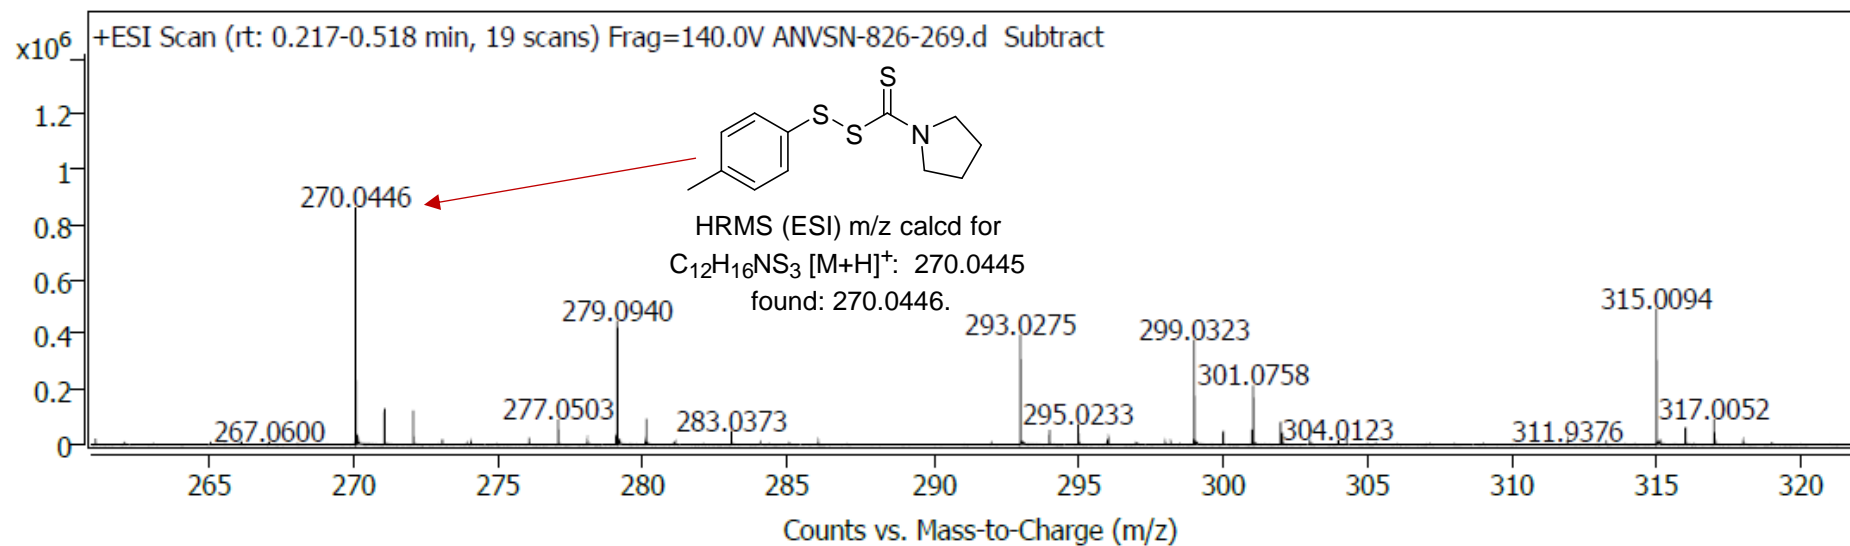

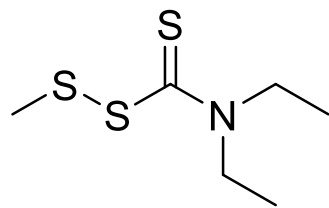

3md, <sup>1</sup>H NMR  
400 MHz, CDCl<sub>3</sub>

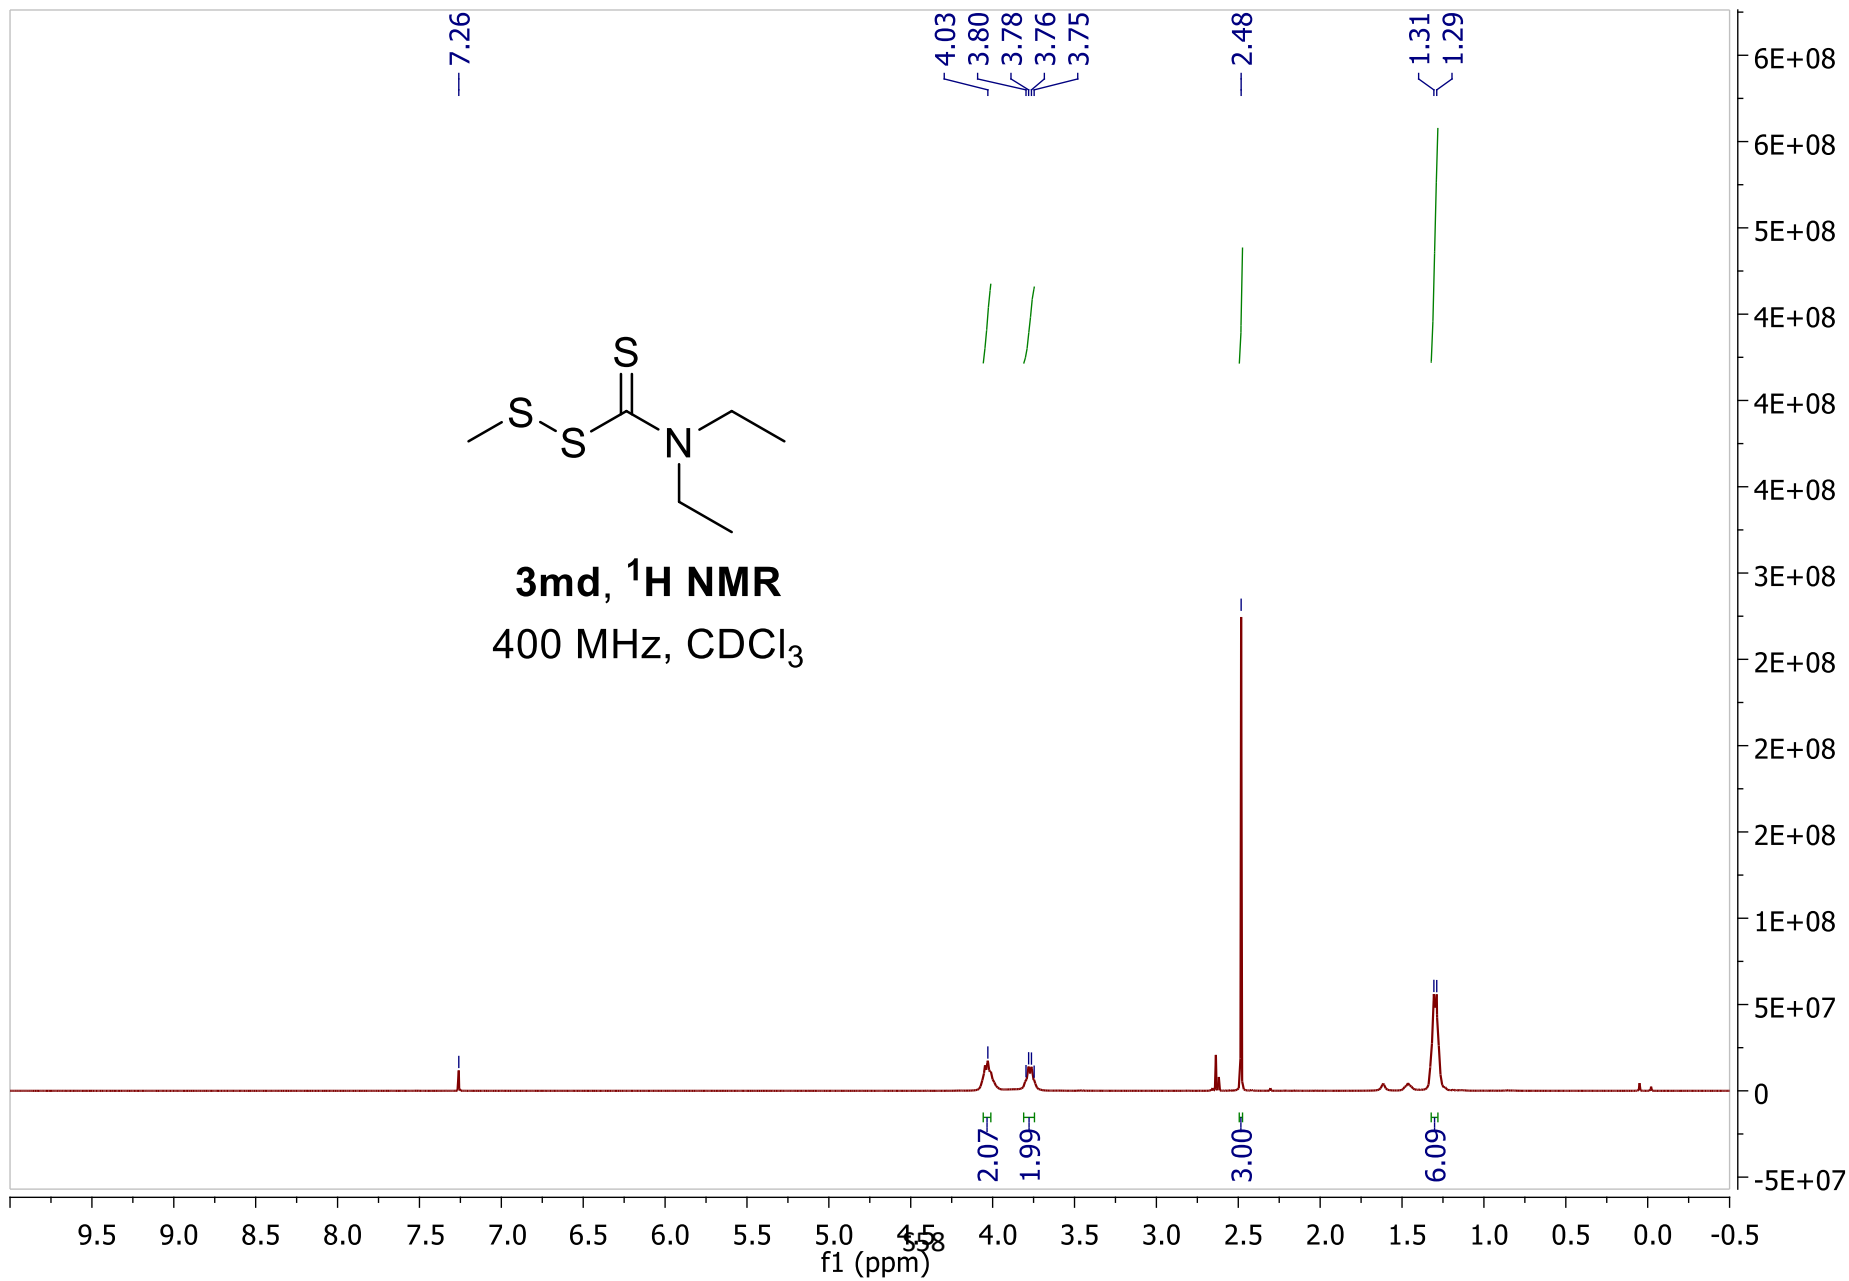

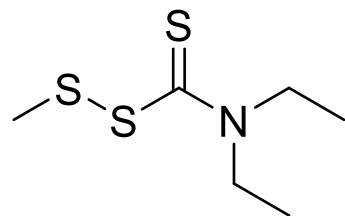

**3md,  $^{13}\text{C}$  NMR**  
100 MHz,  $\text{CDCl}_3$

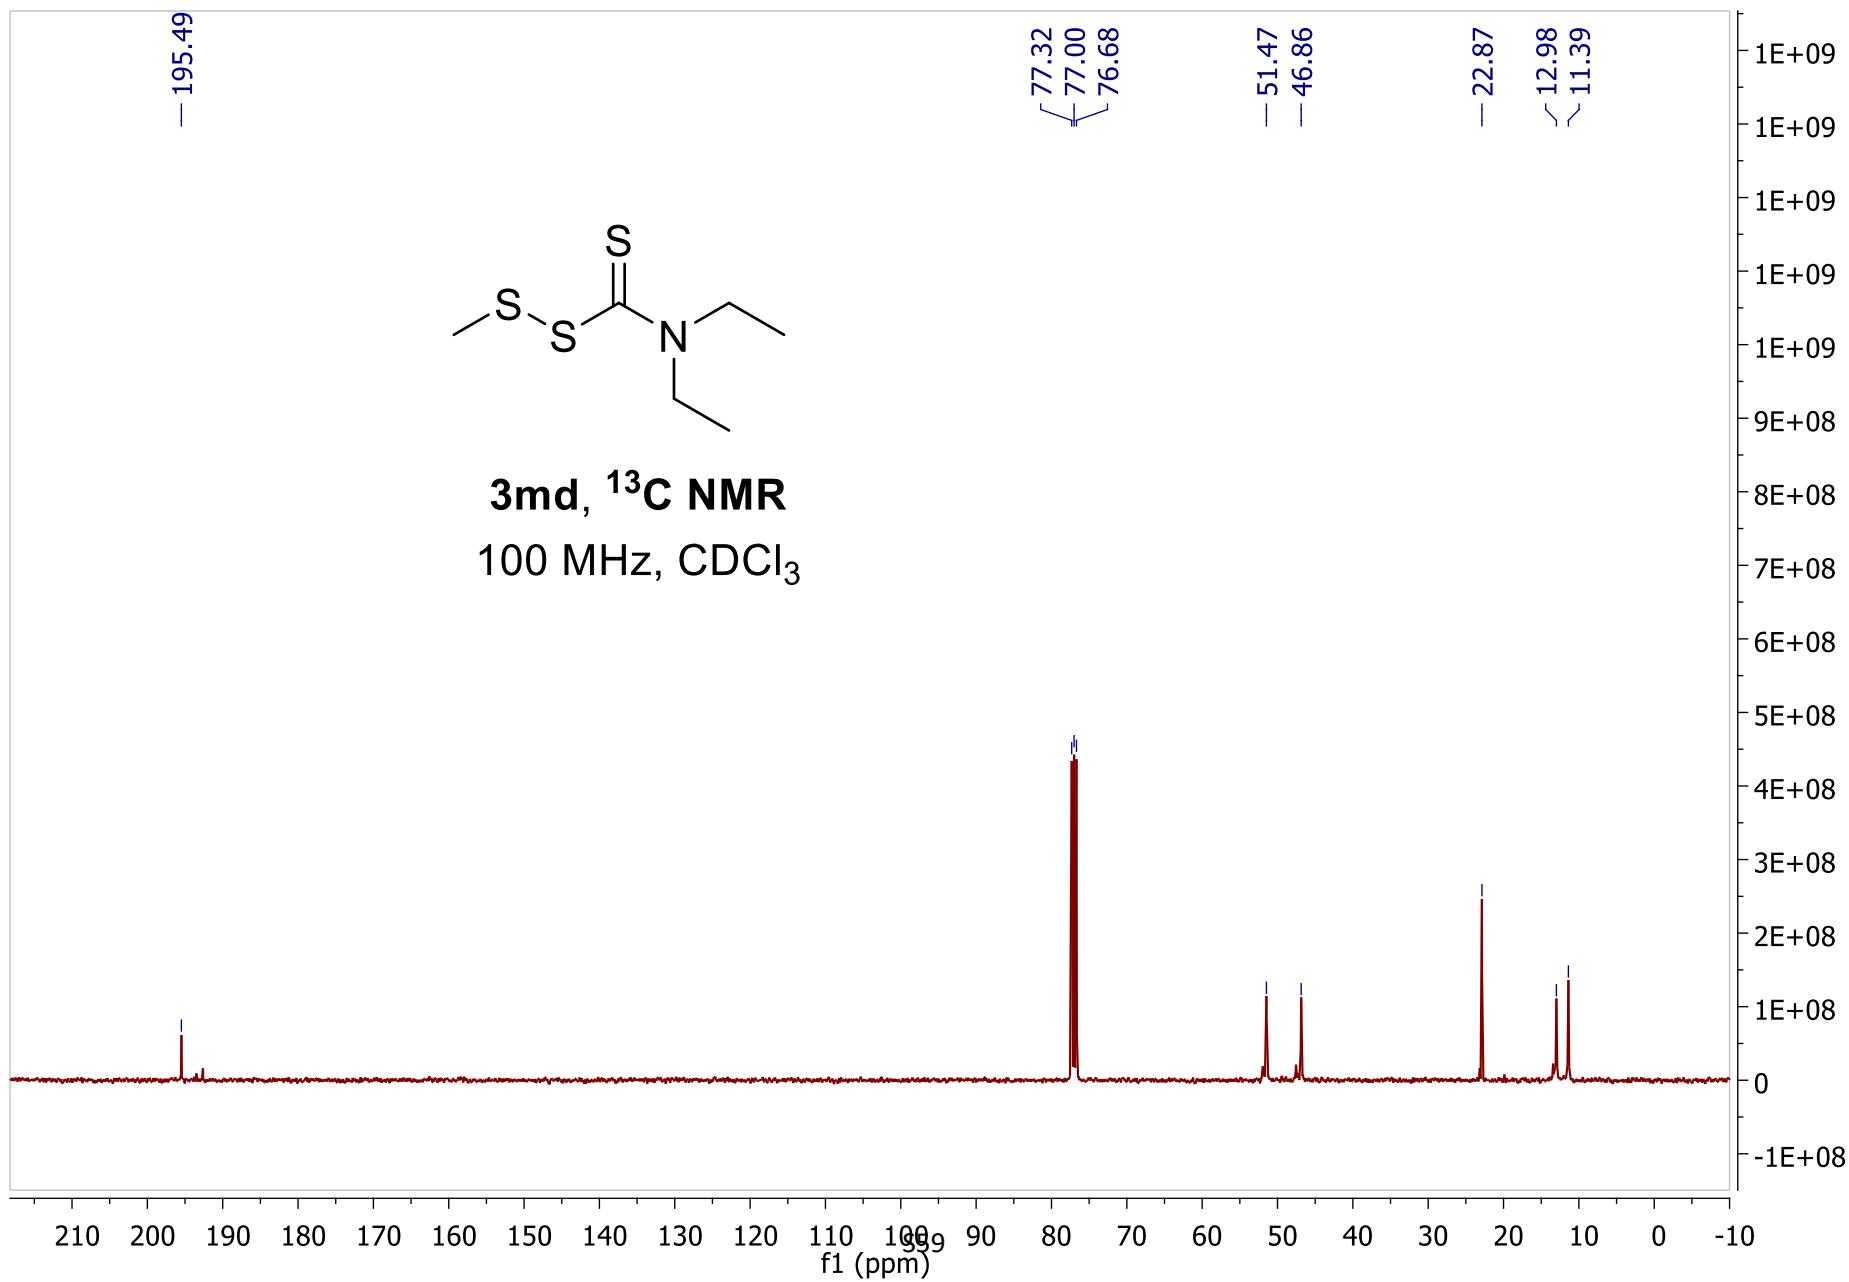

# Spectrum Plot Report

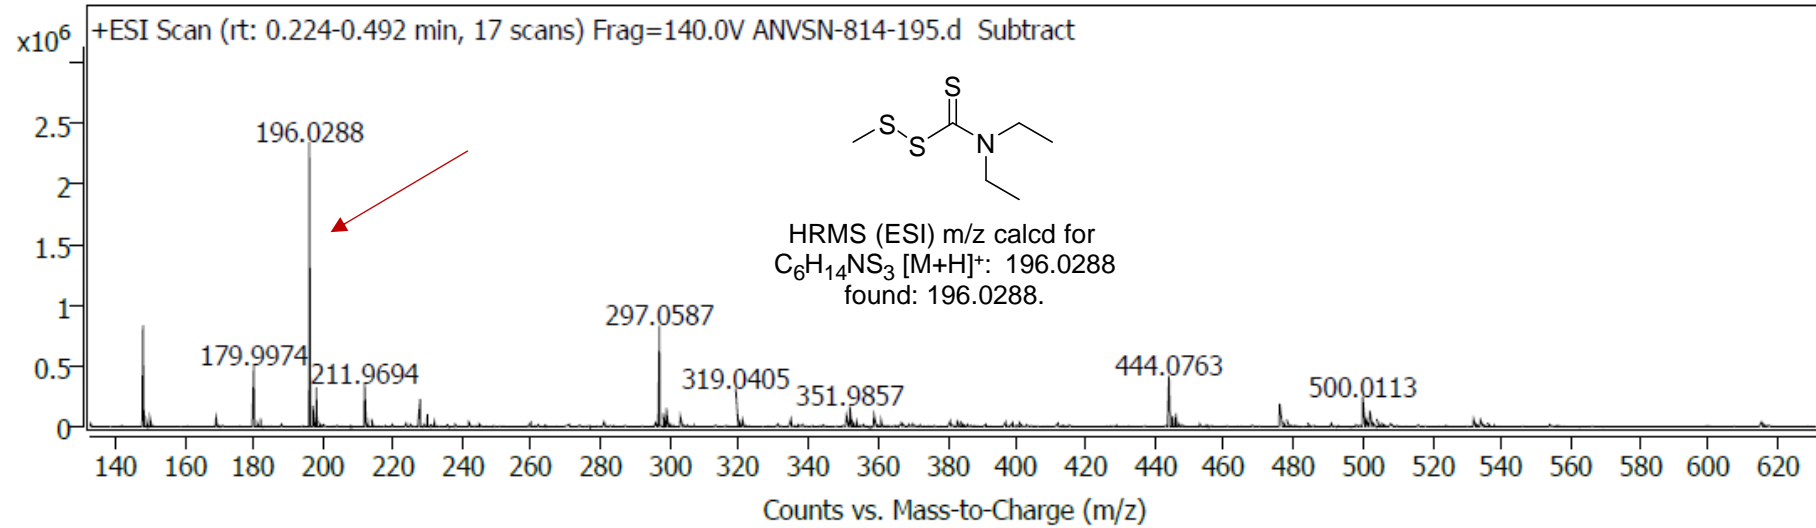

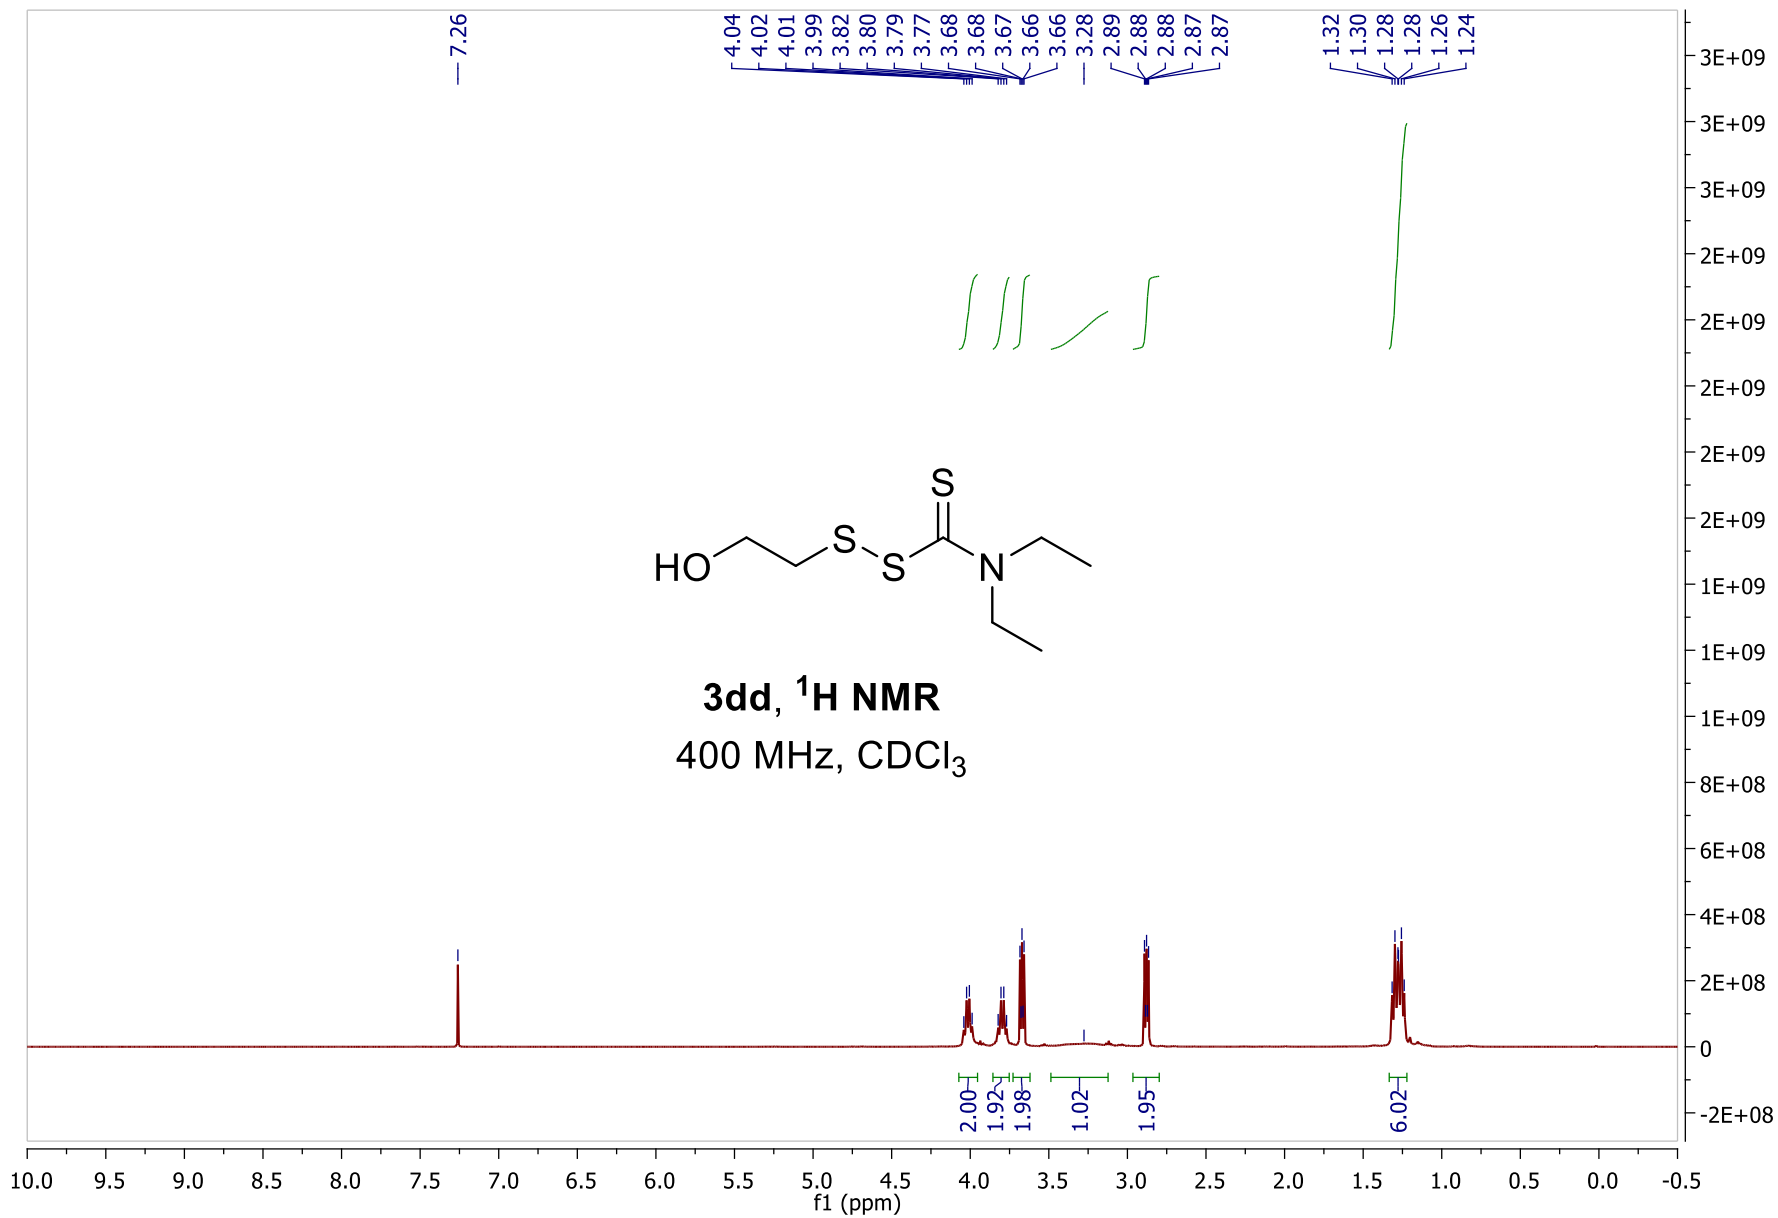

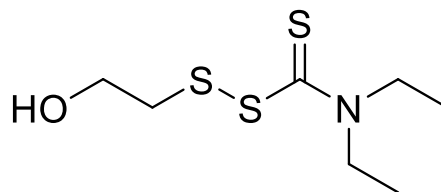

**3dd,  $^{13}\text{C}$  NMR**  
100 MHz,  $\text{CDCl}_3$

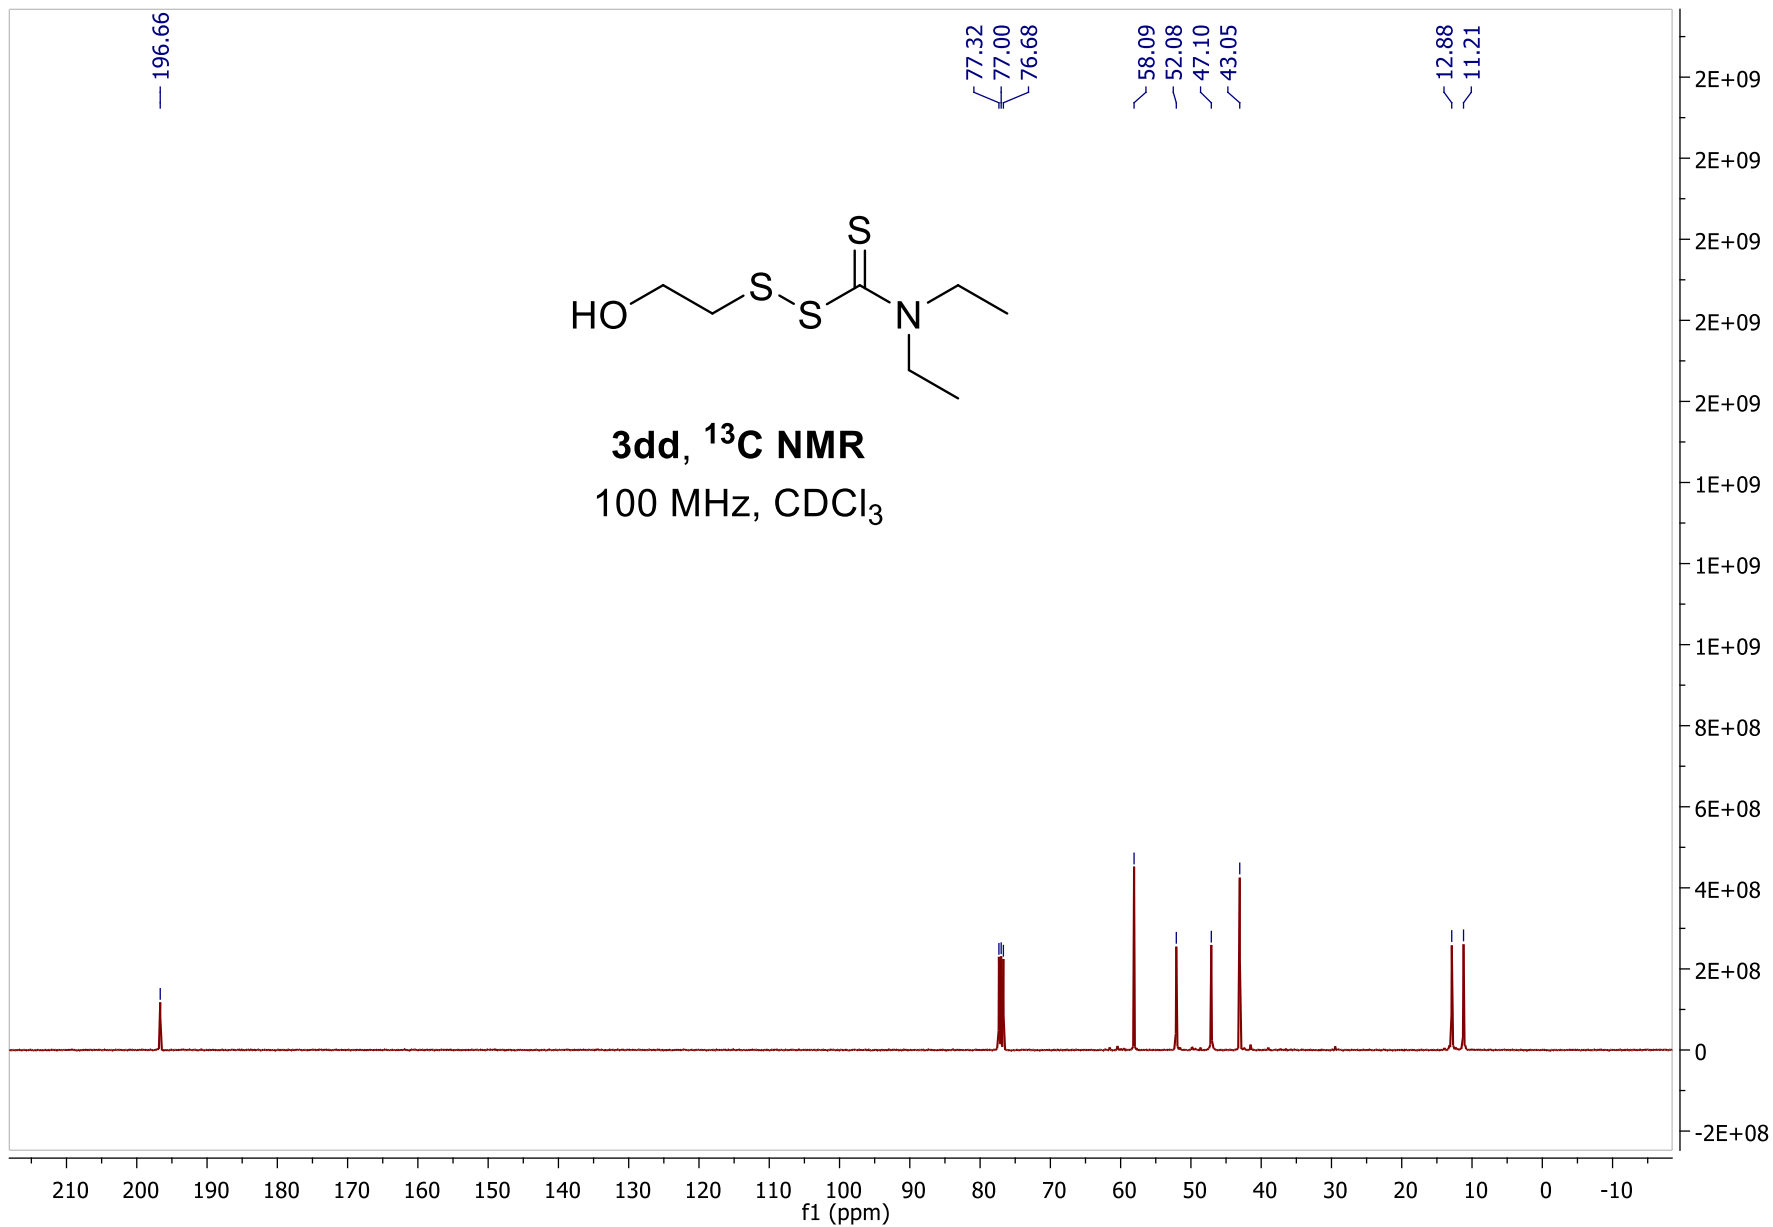

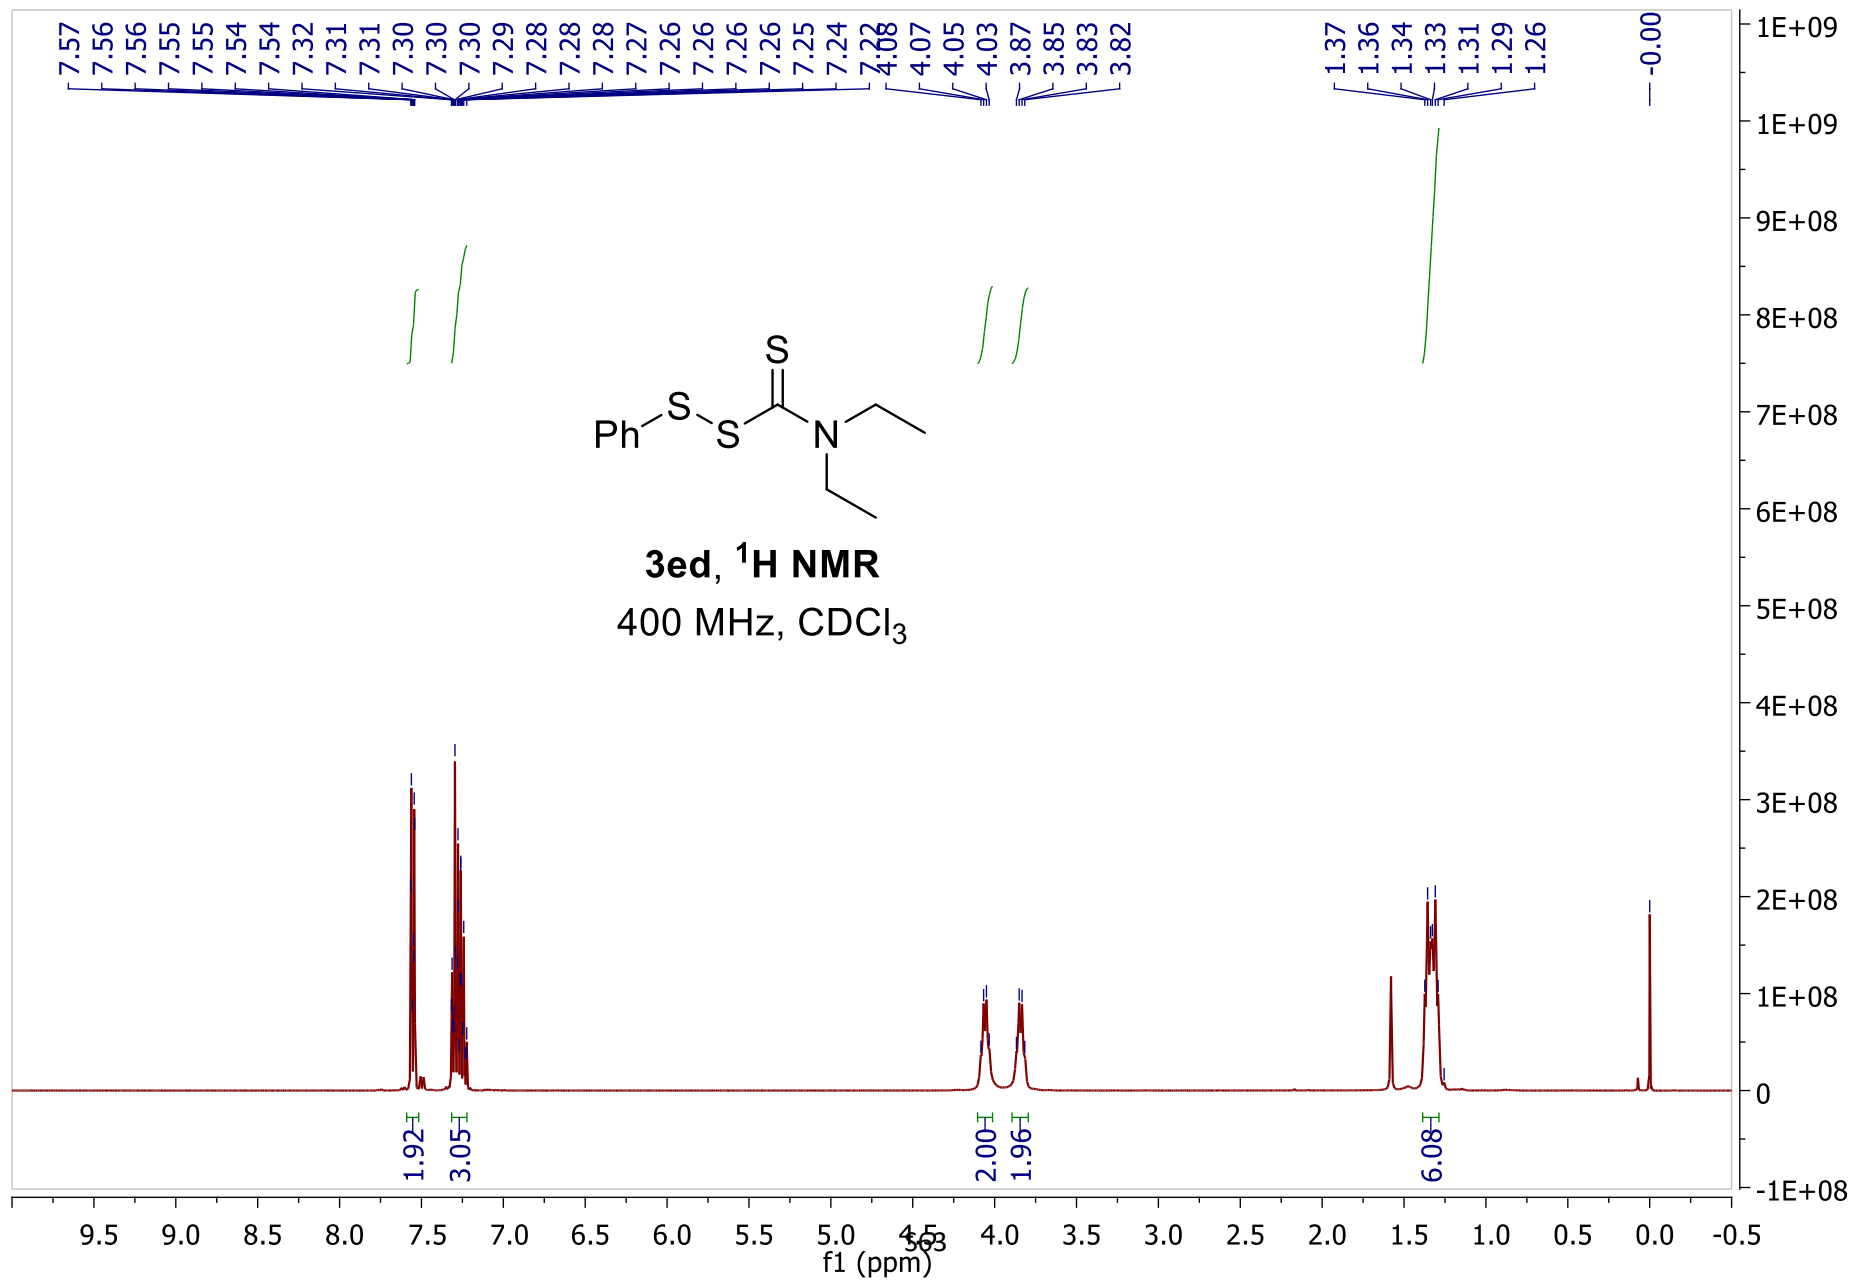

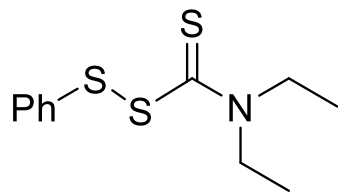

**3ed,  $^{13}\text{C}$  NMR**  
100 MHz,  $\text{CDCl}_3$

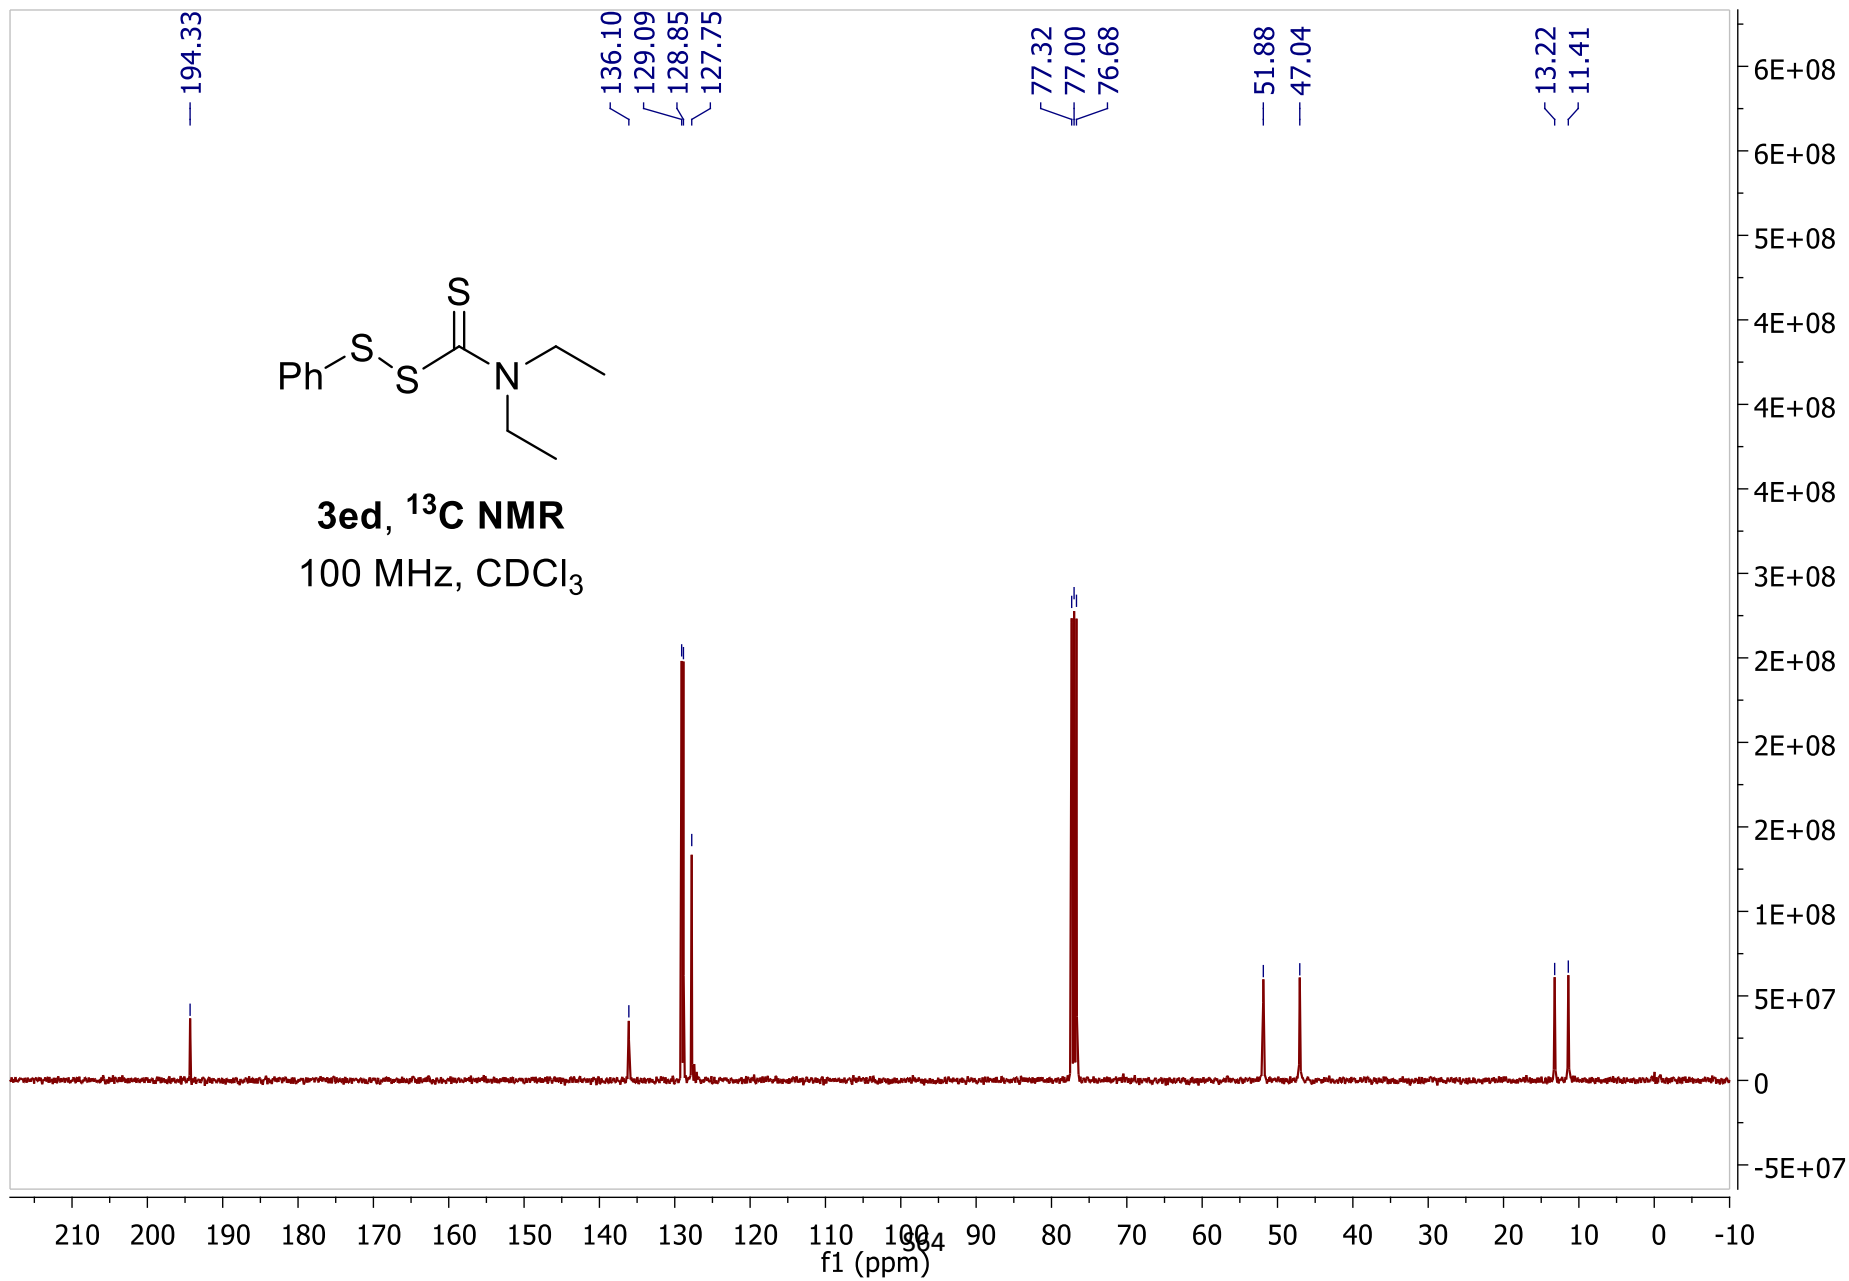



# Spectrum Plot Report

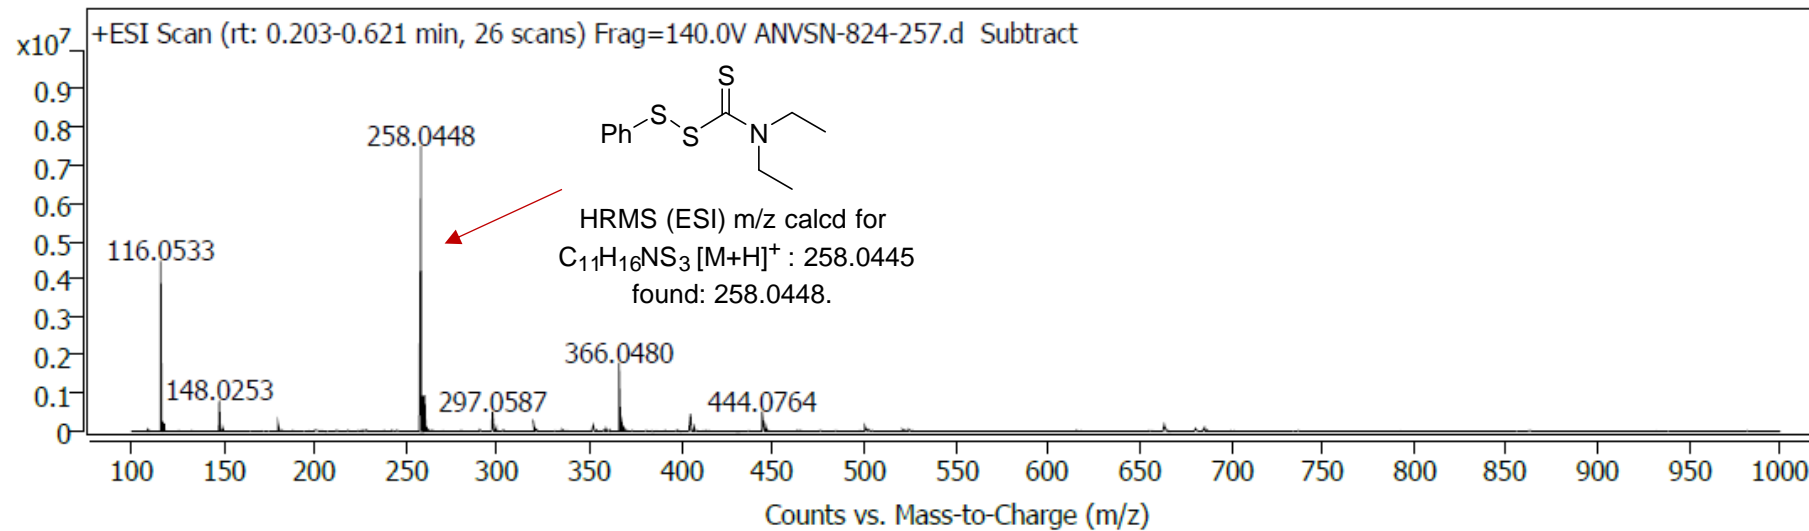

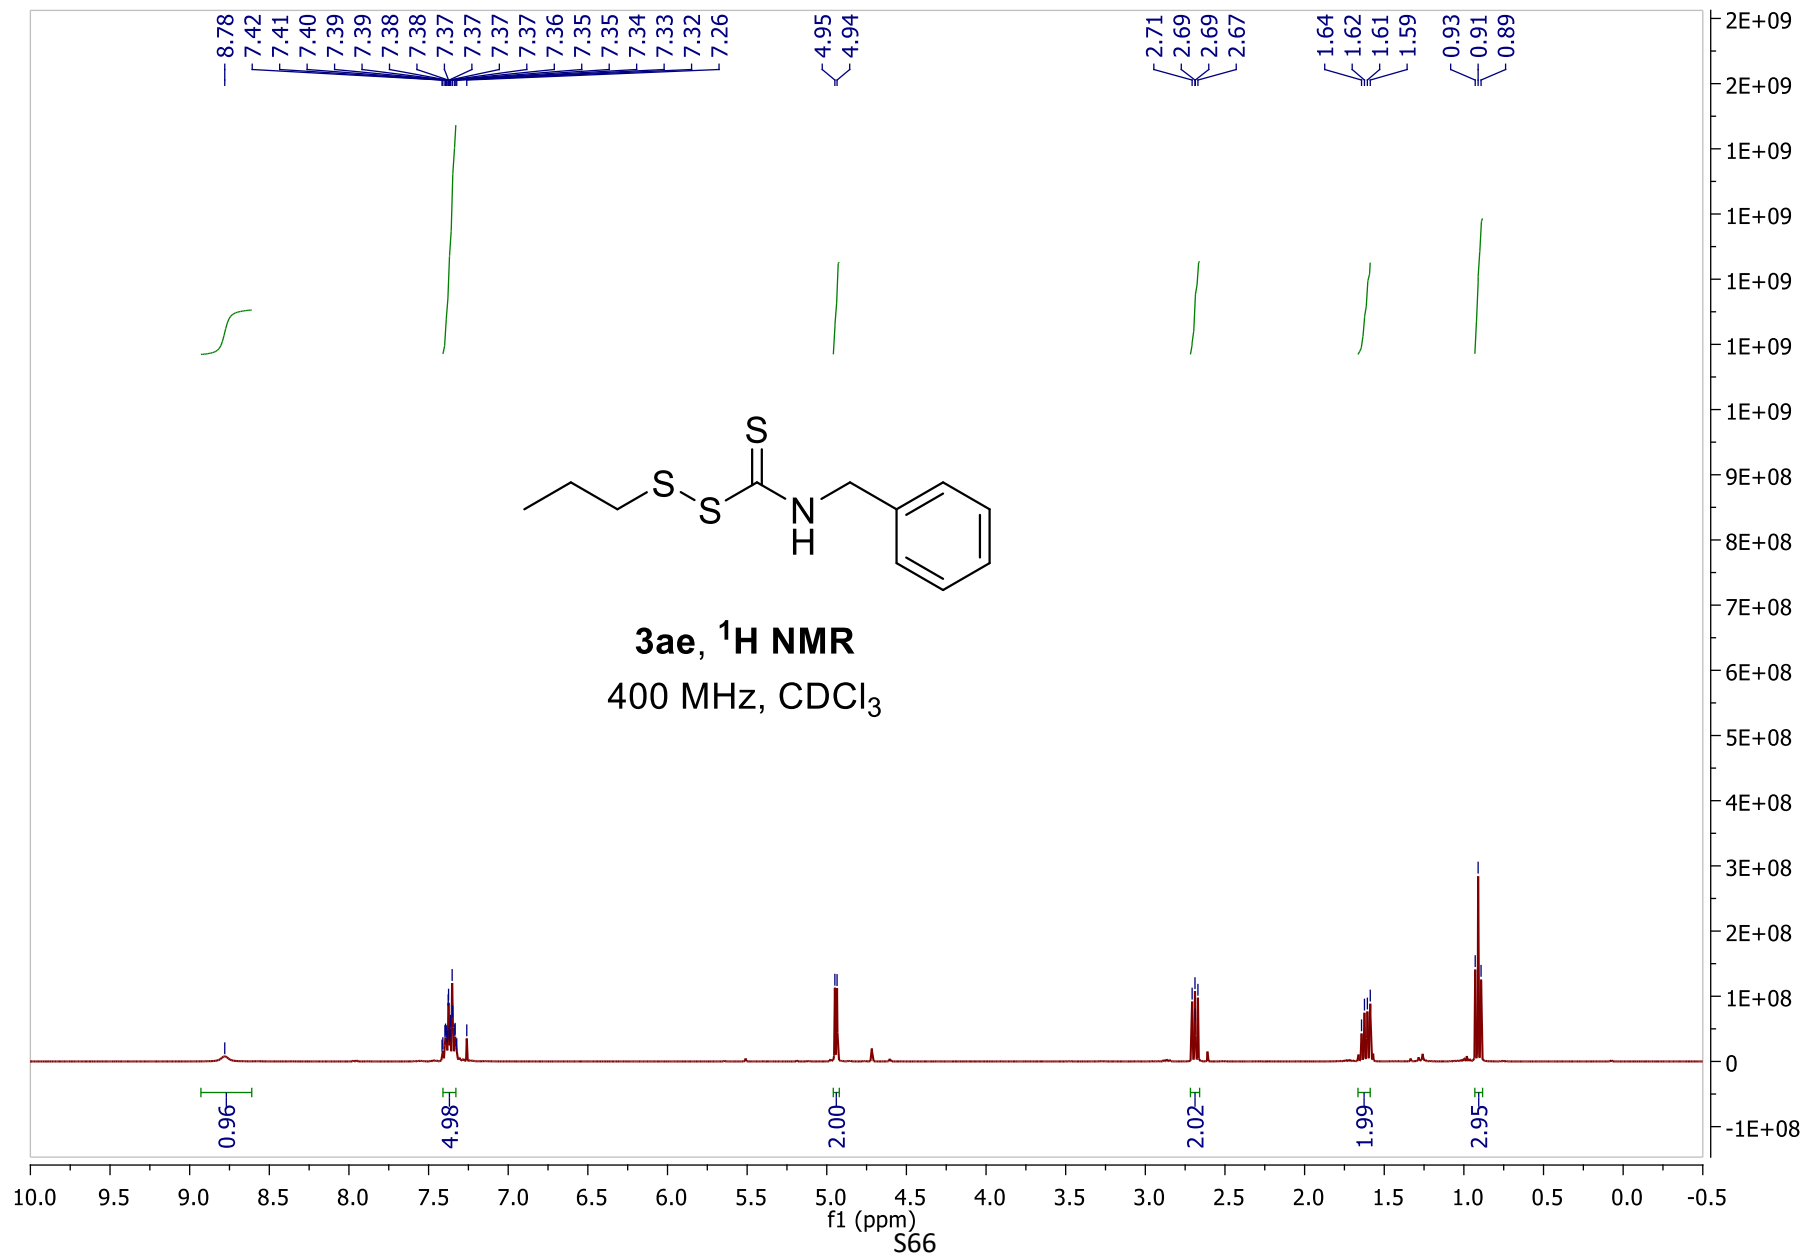

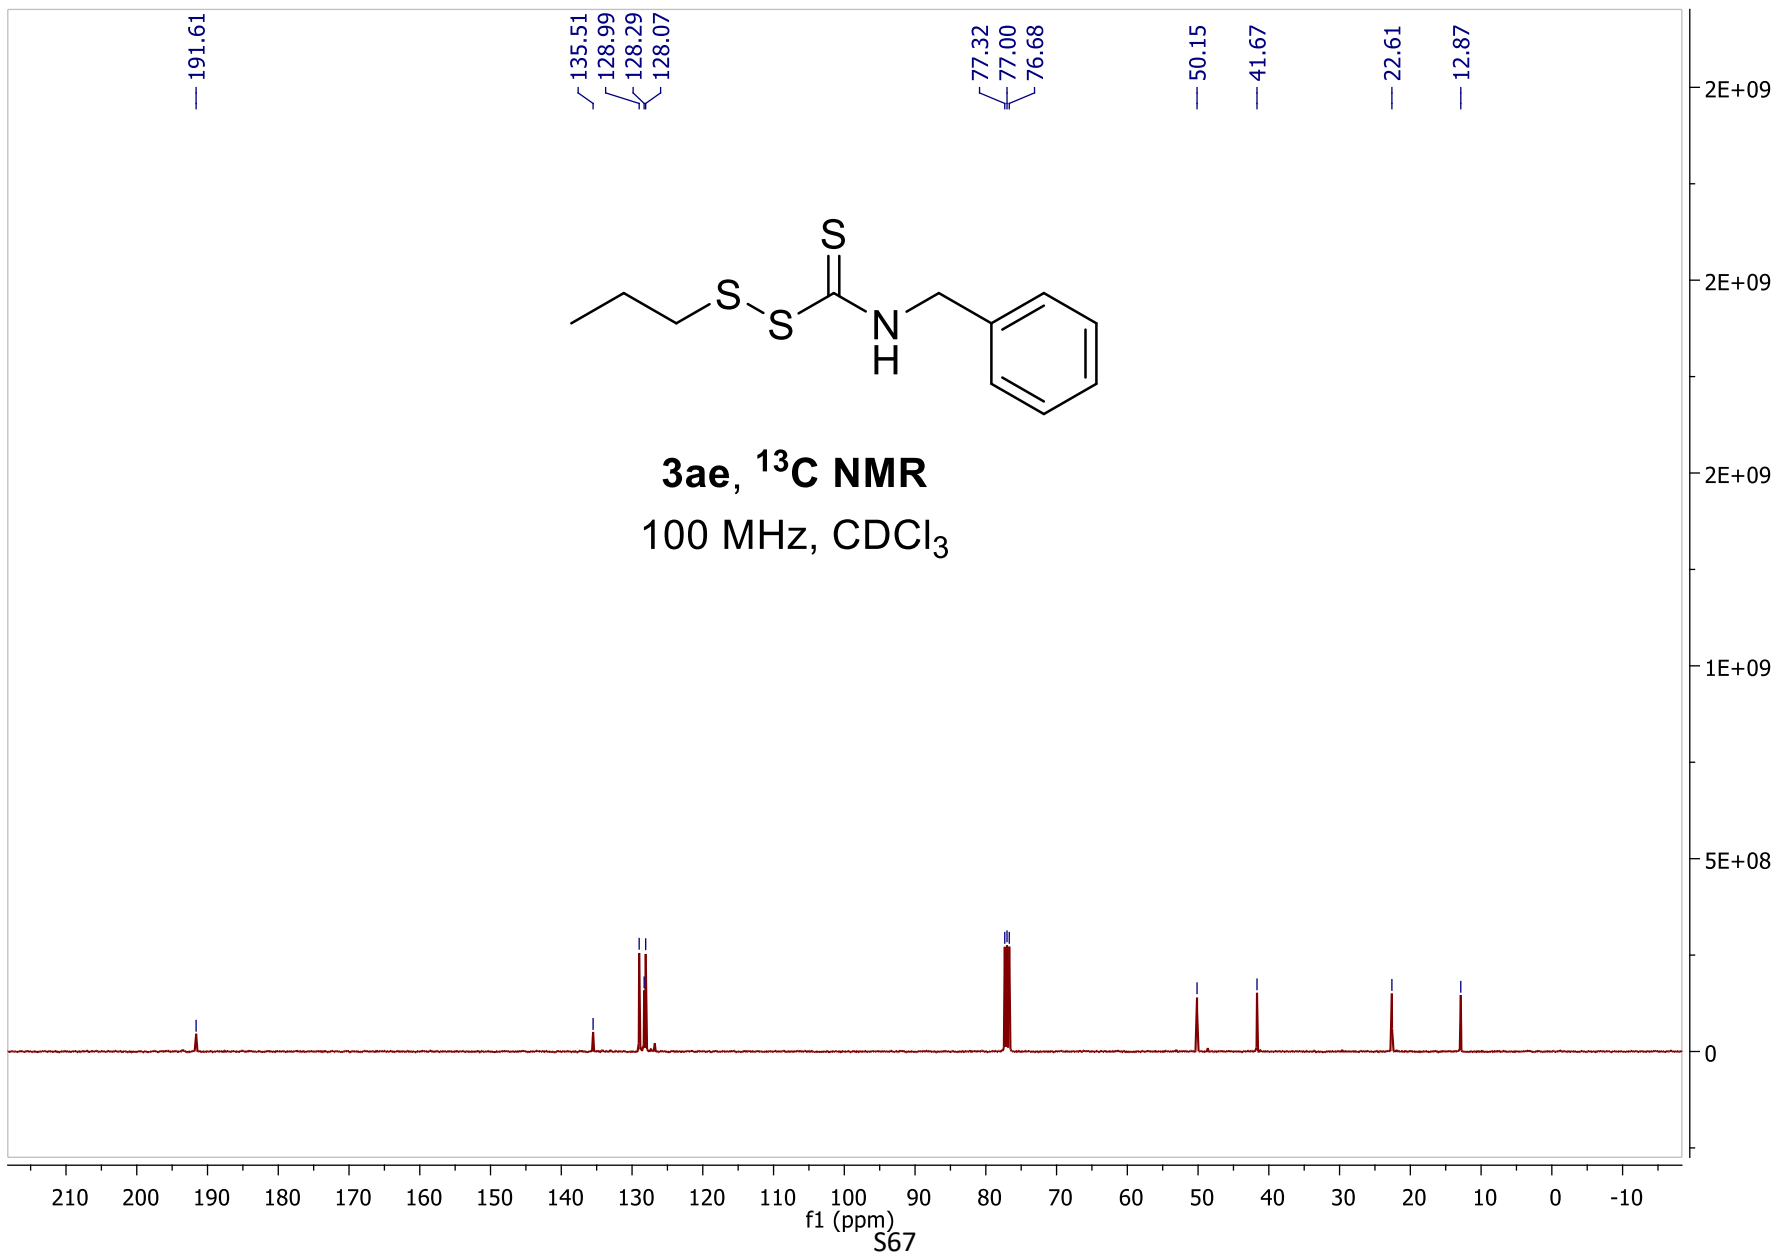

# Spectrum Plot Report

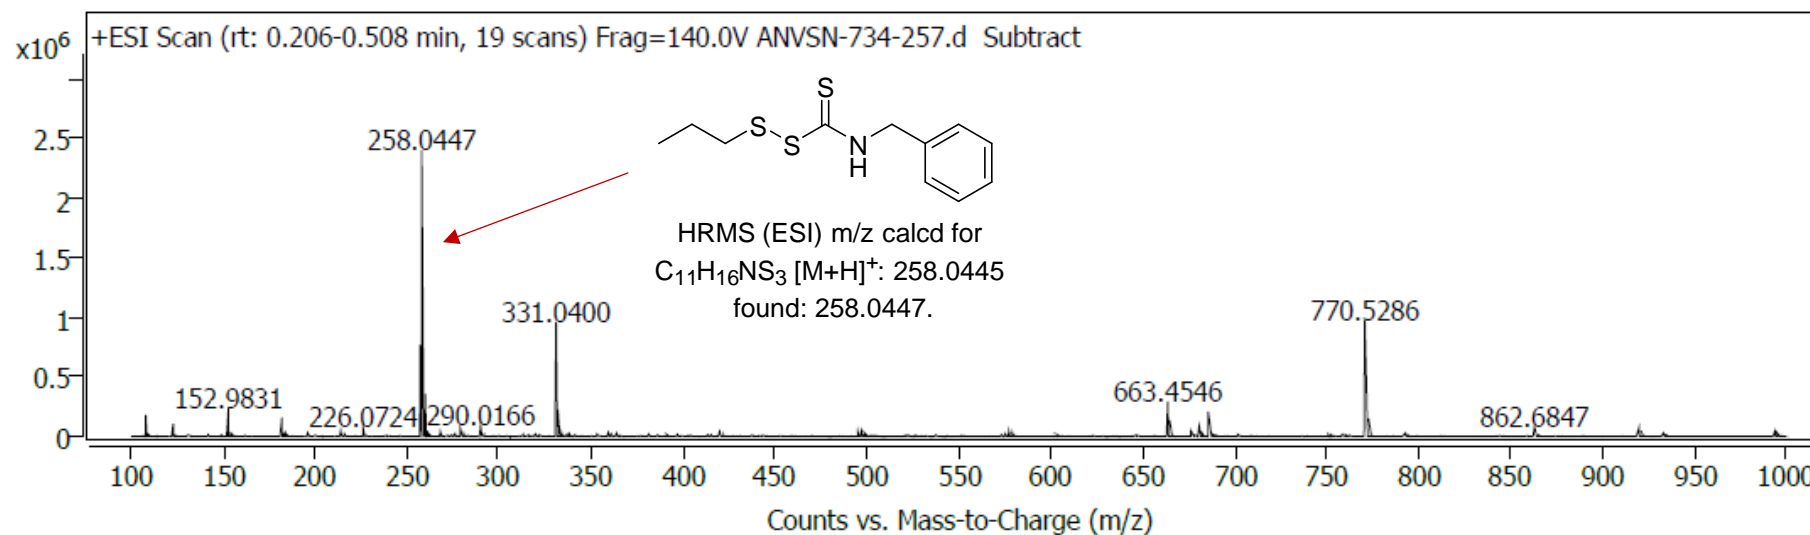

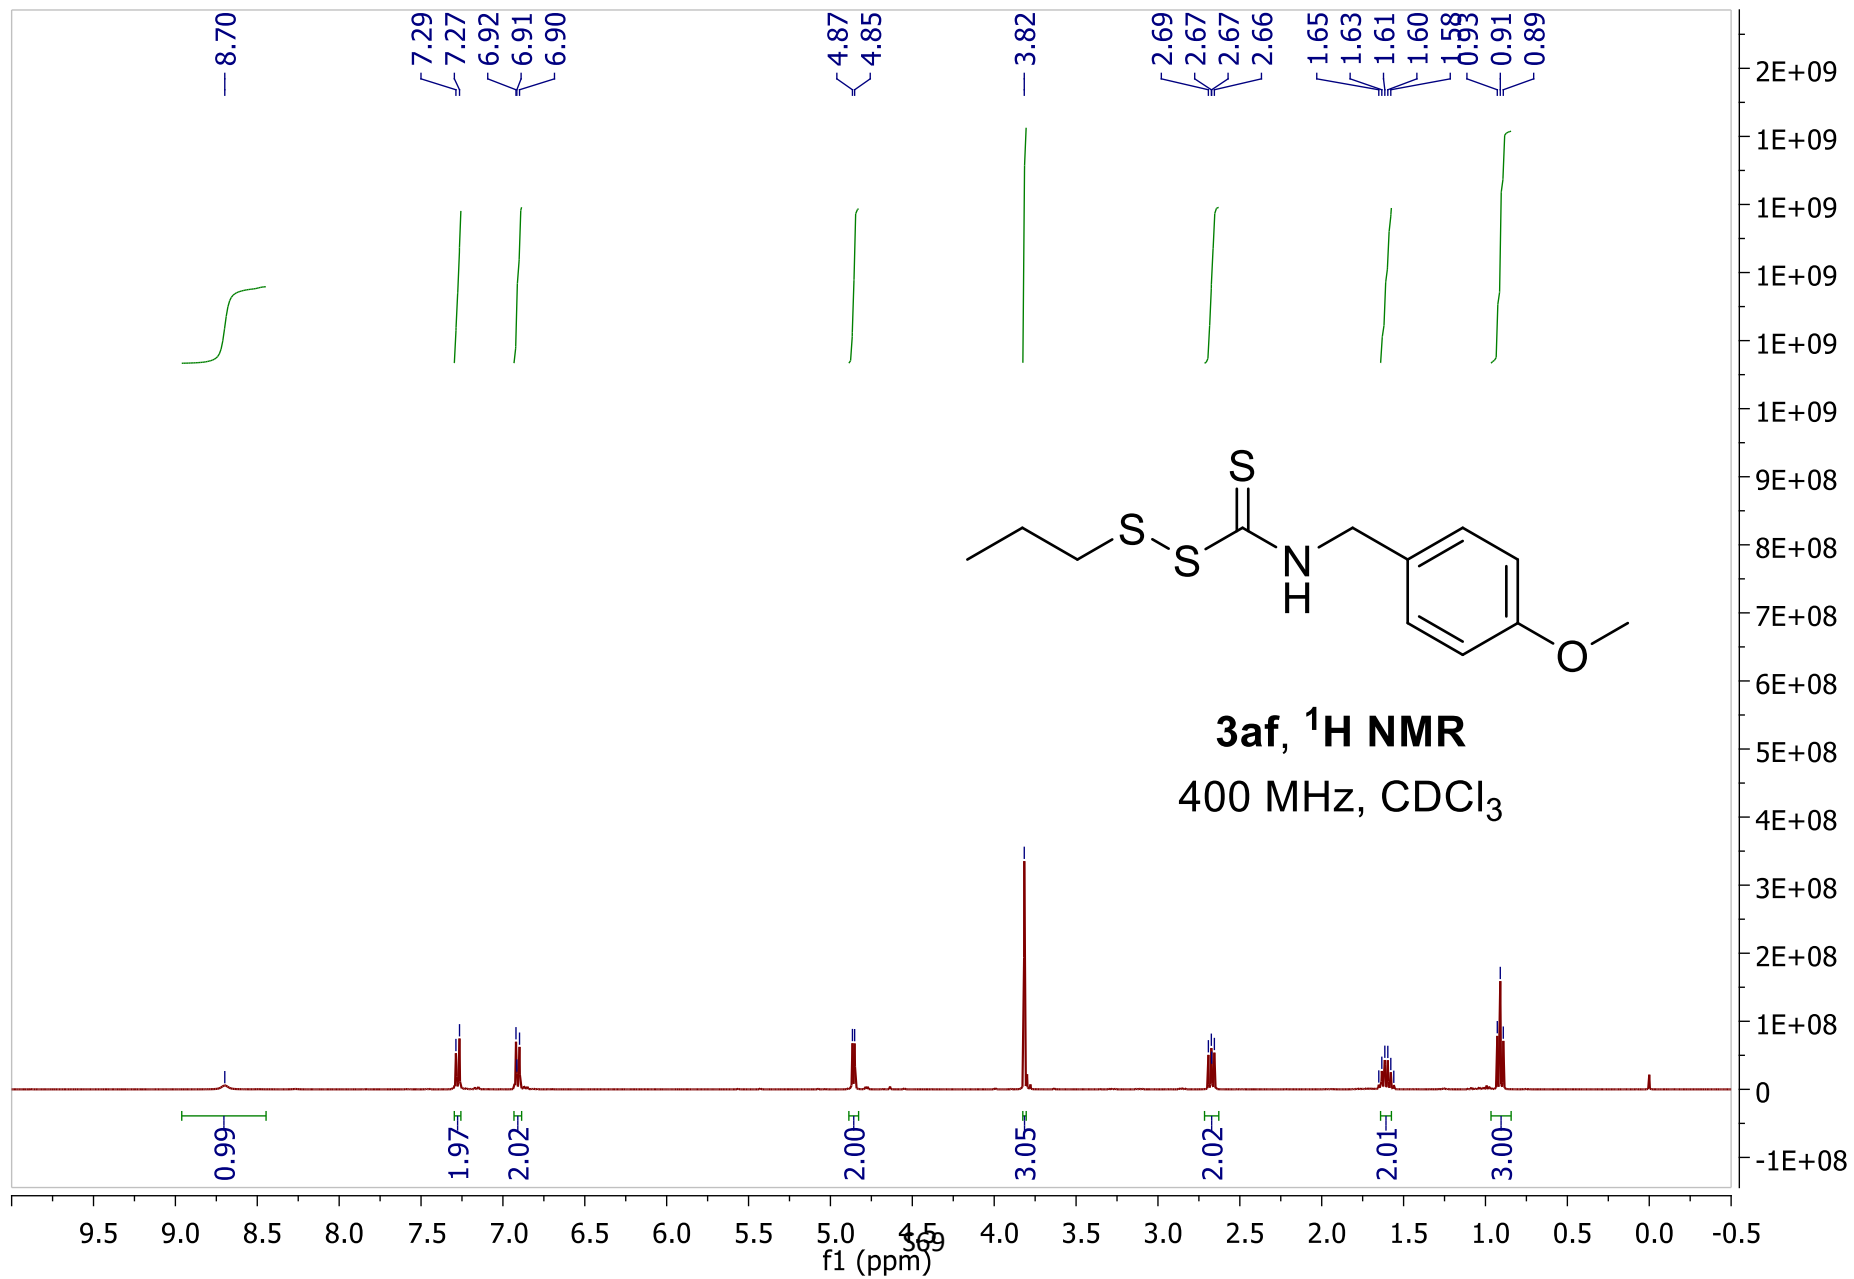

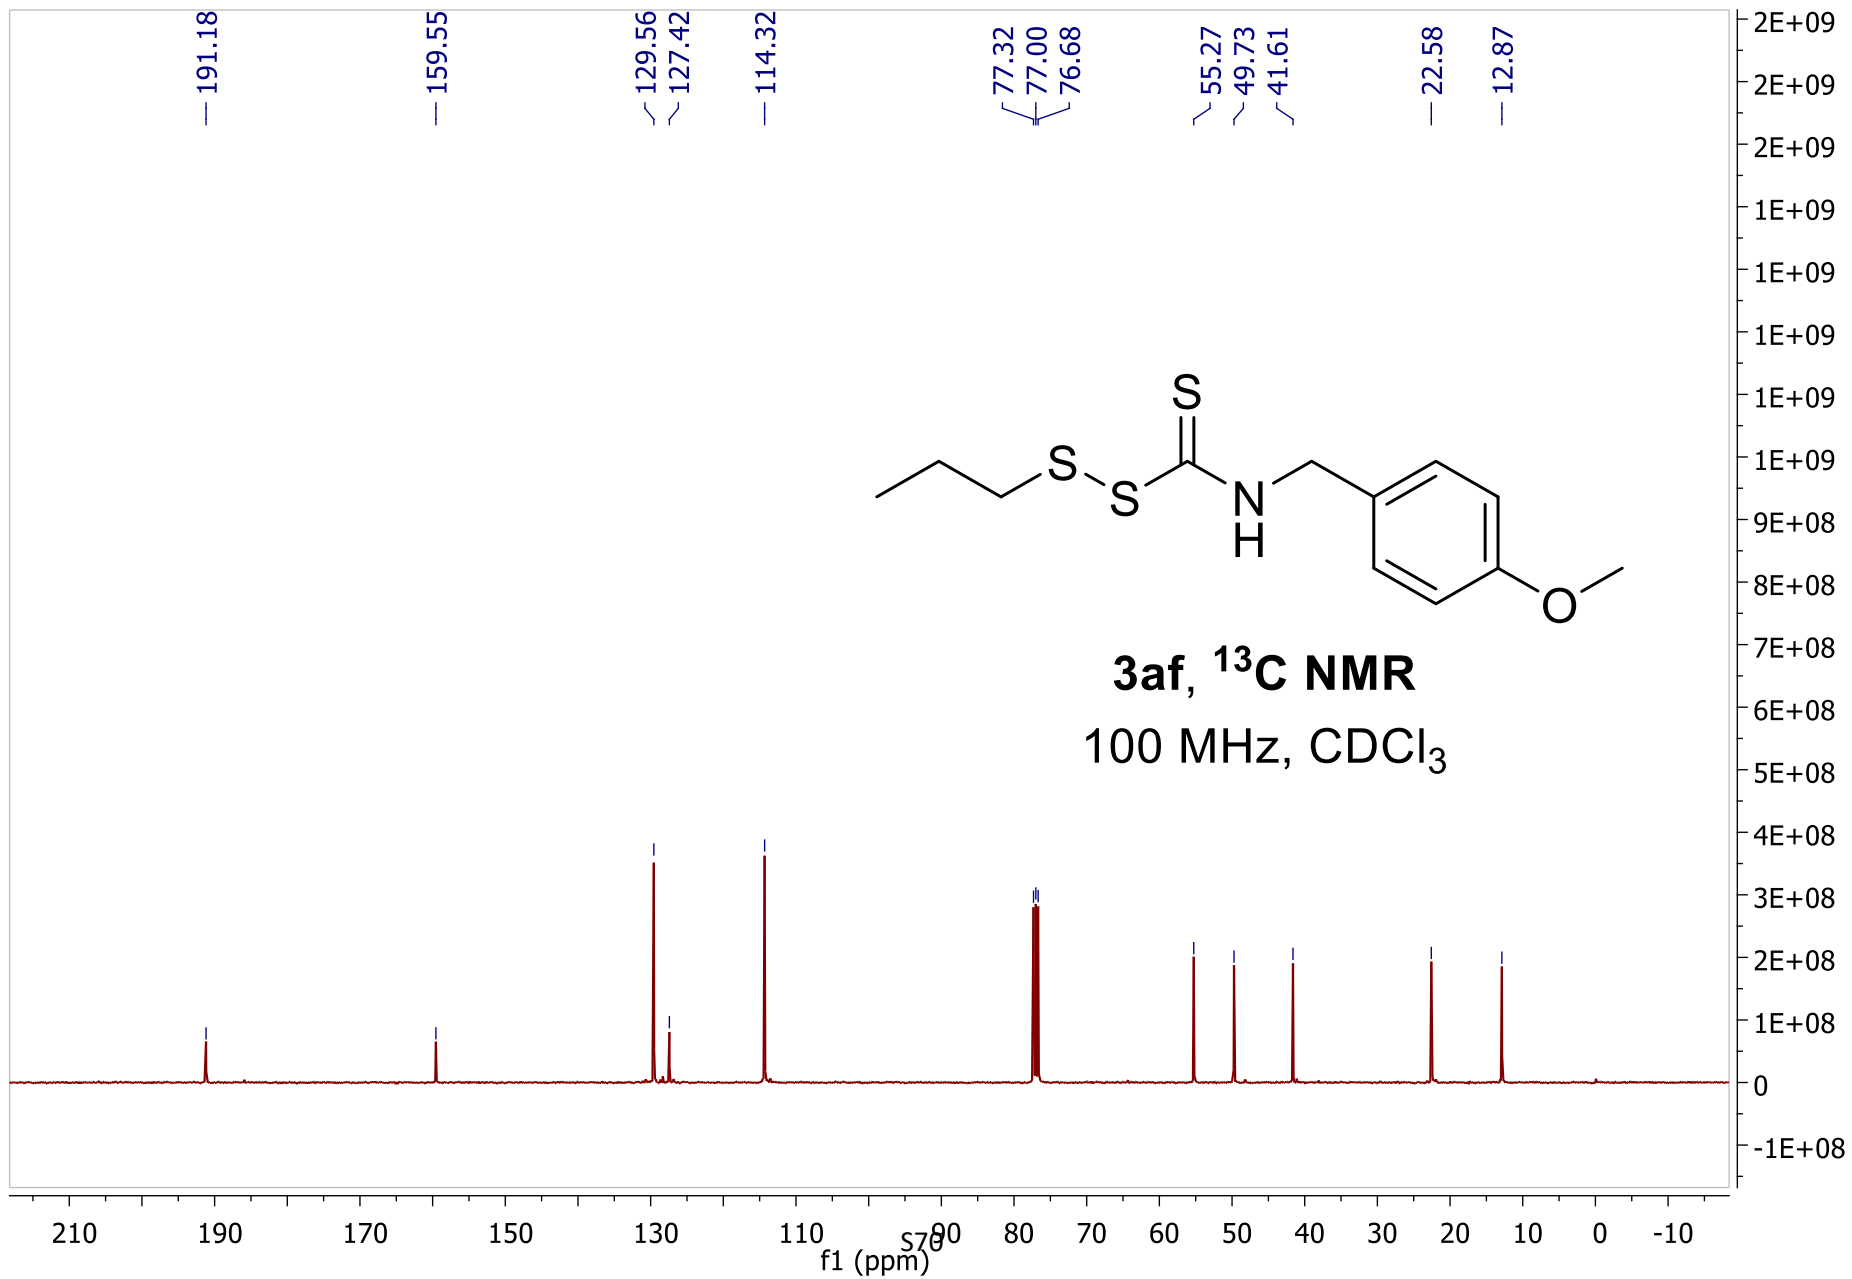

# Spectrum Plot Report

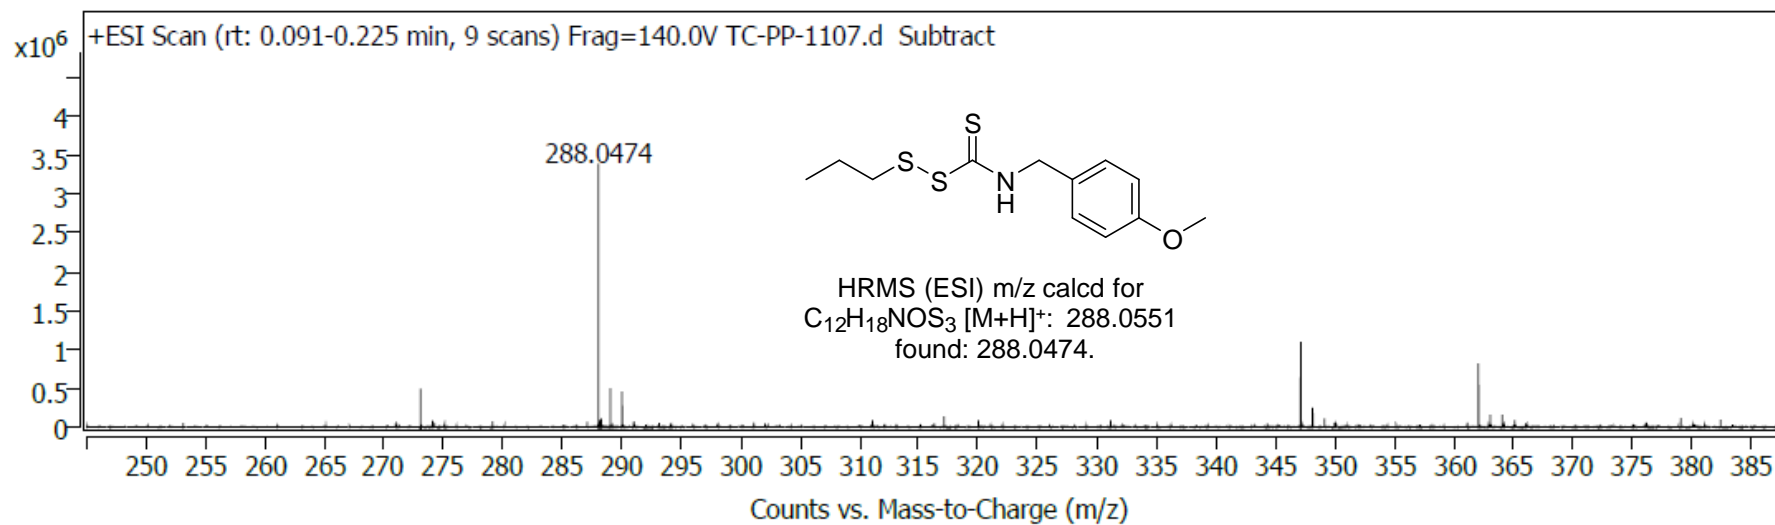

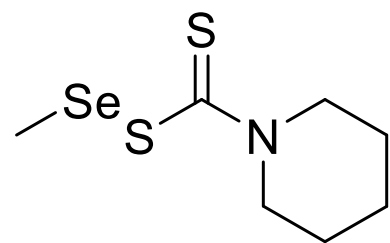

**3na, <sup>1</sup>H NMR**  
400 MHz, CDCl<sub>3</sub>

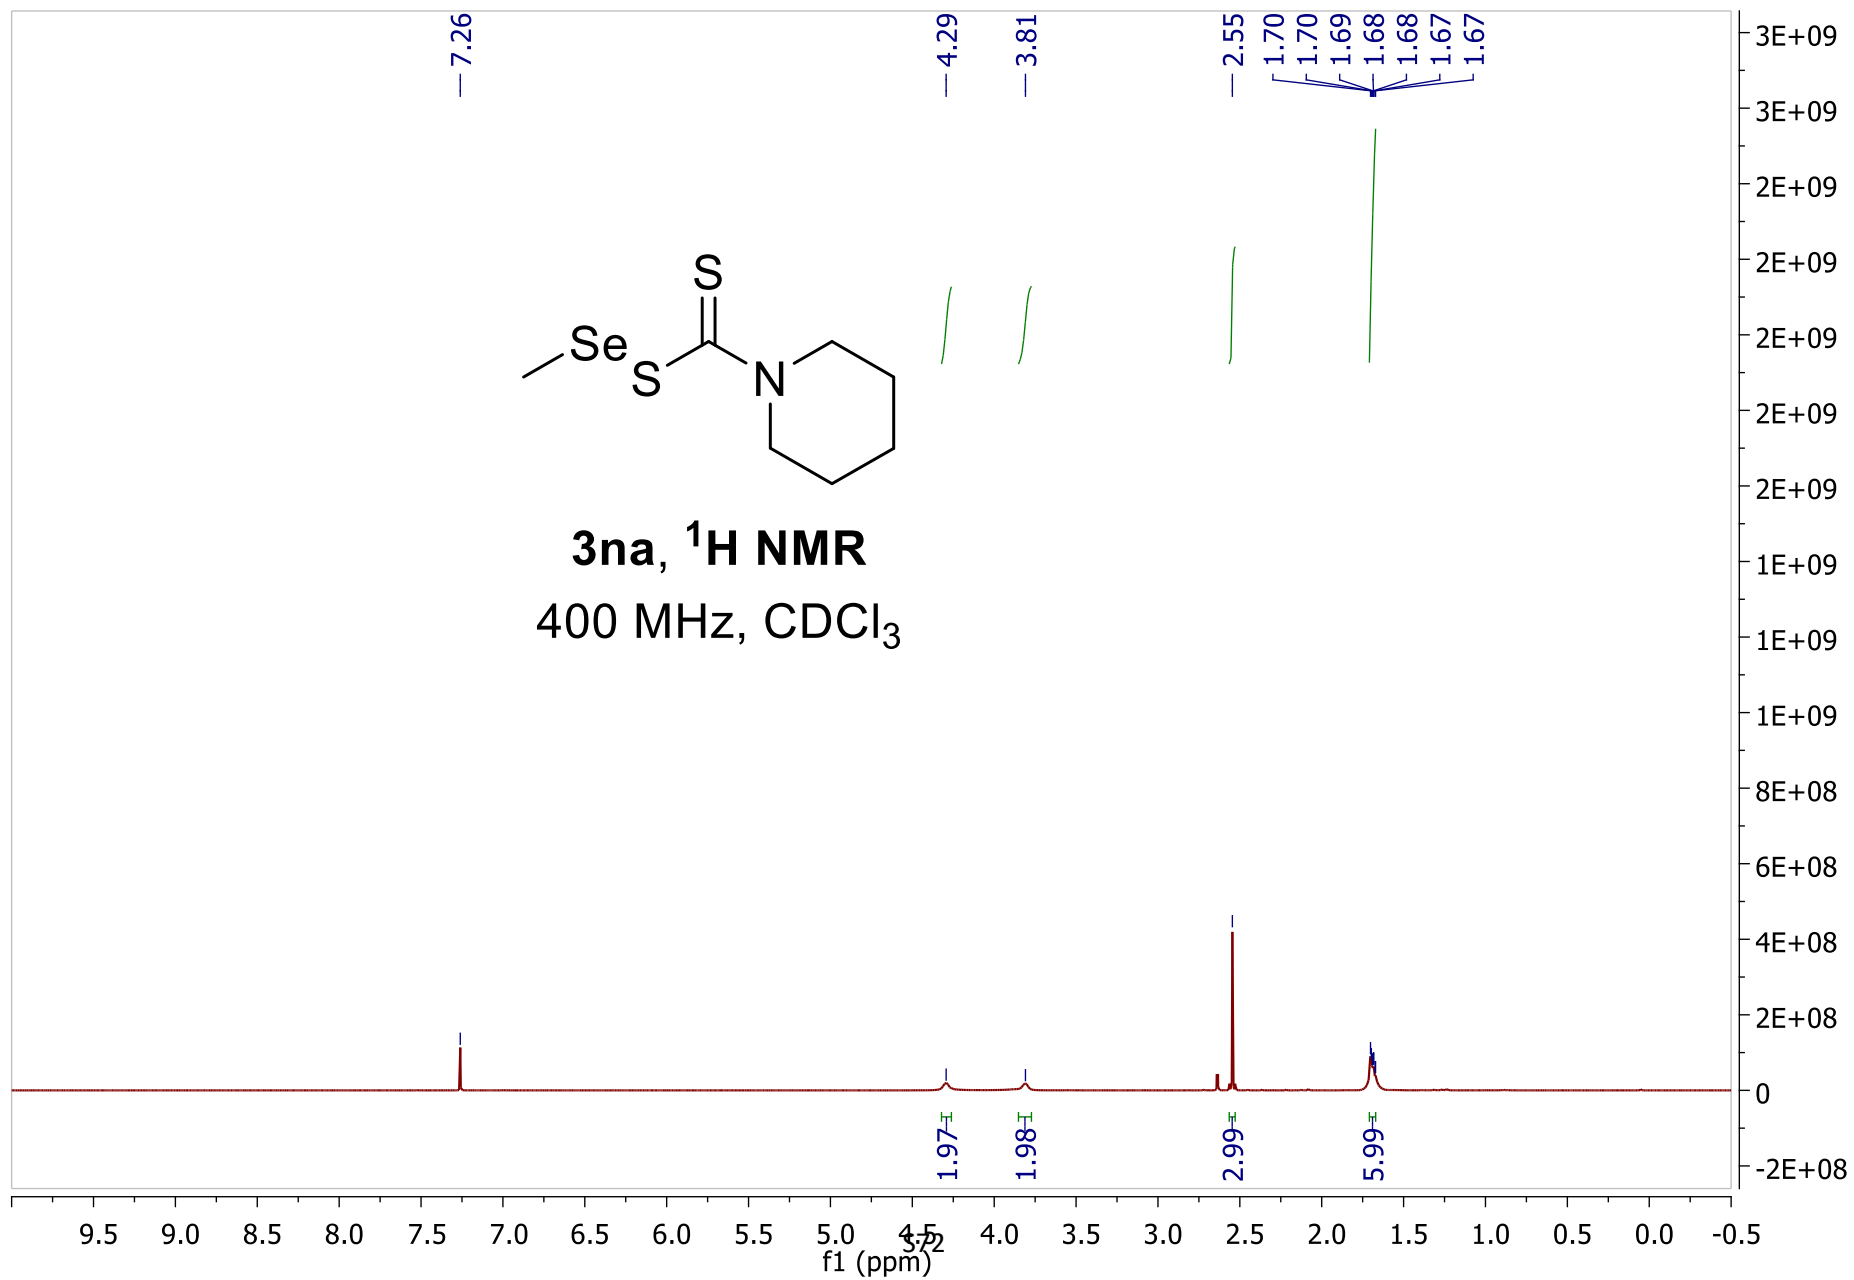



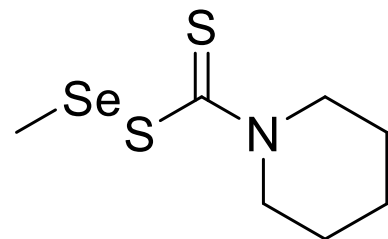

**3na,  $^{13}\text{C}$  NMR**  
100 MHz,  $\text{CDCl}_3$

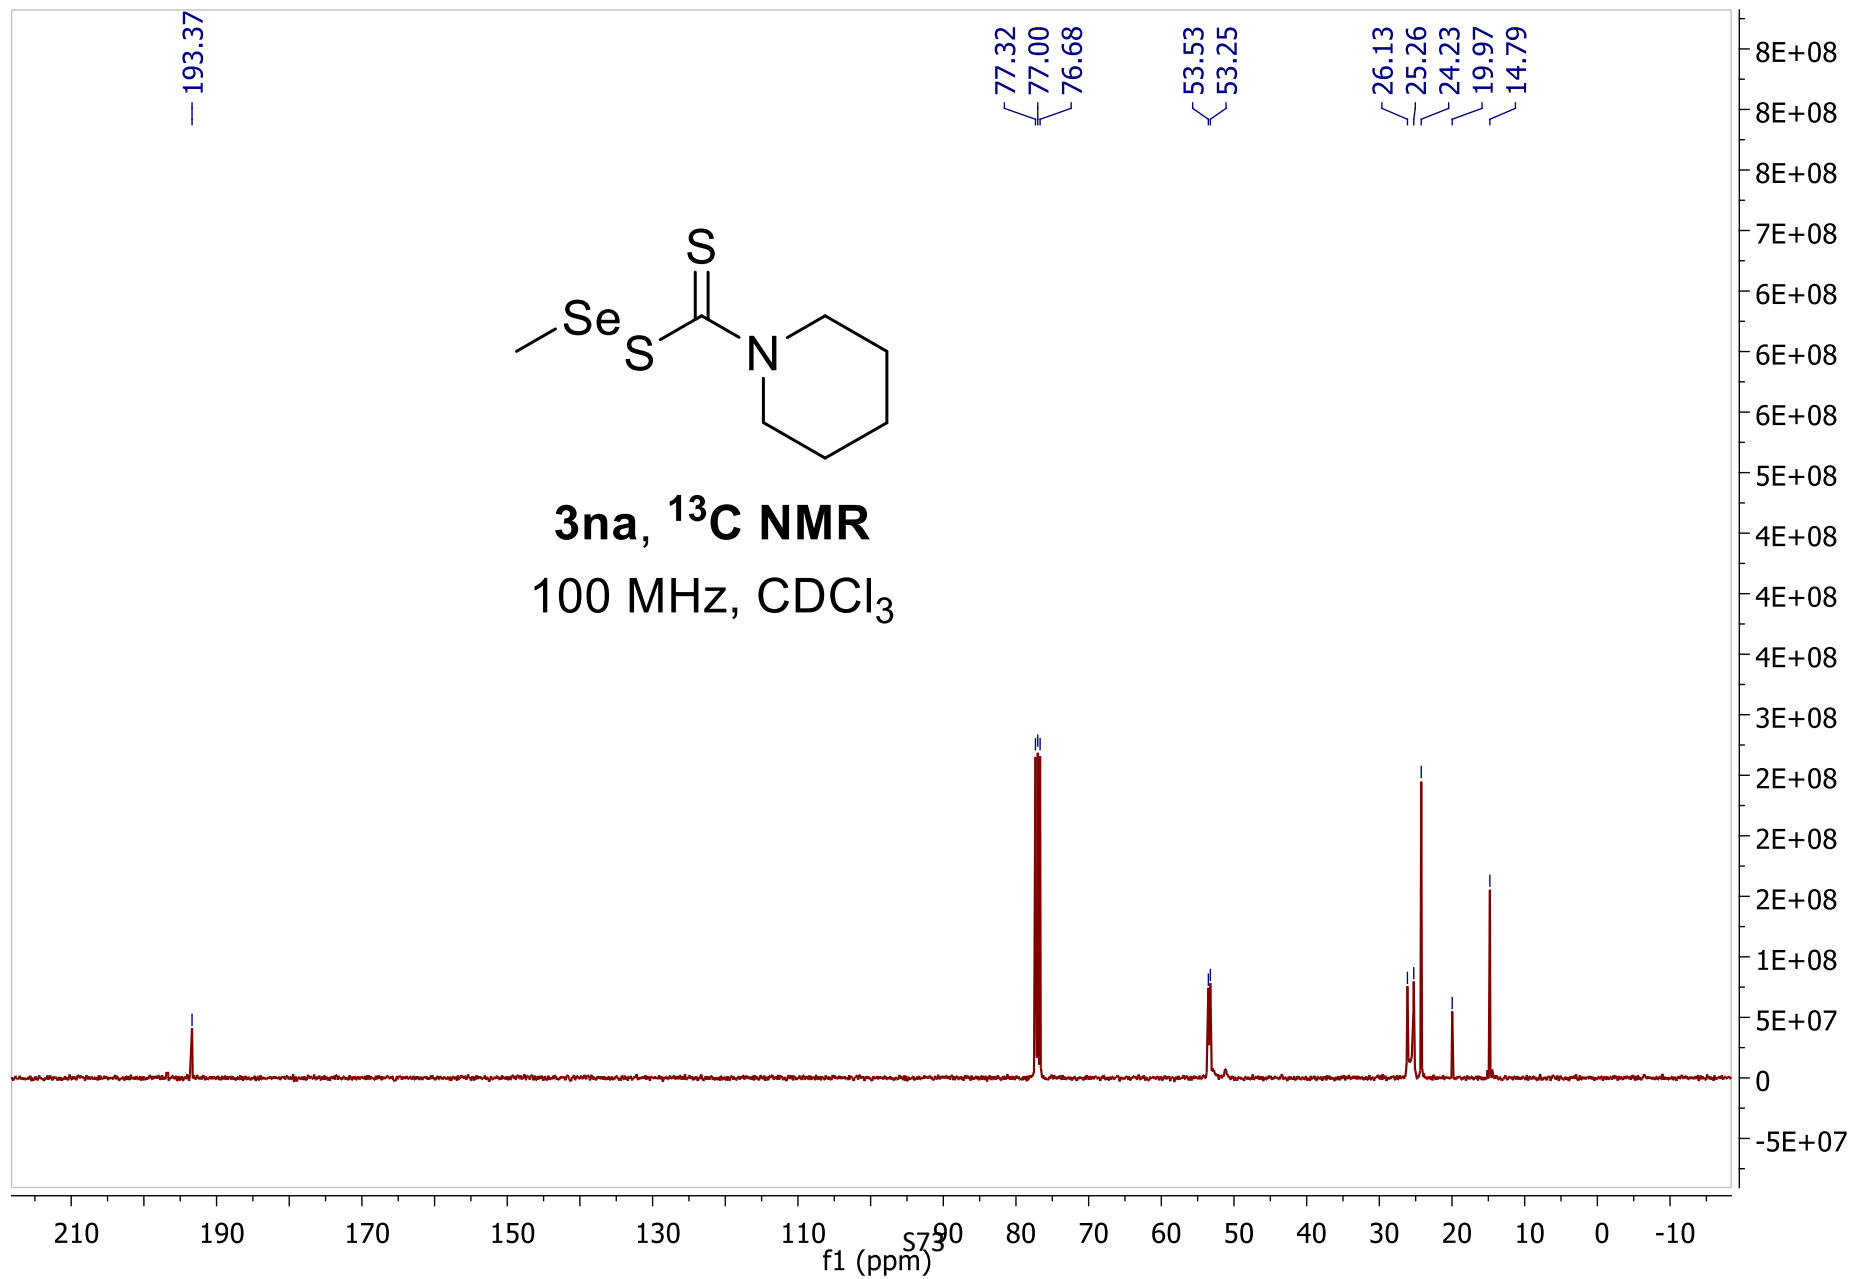

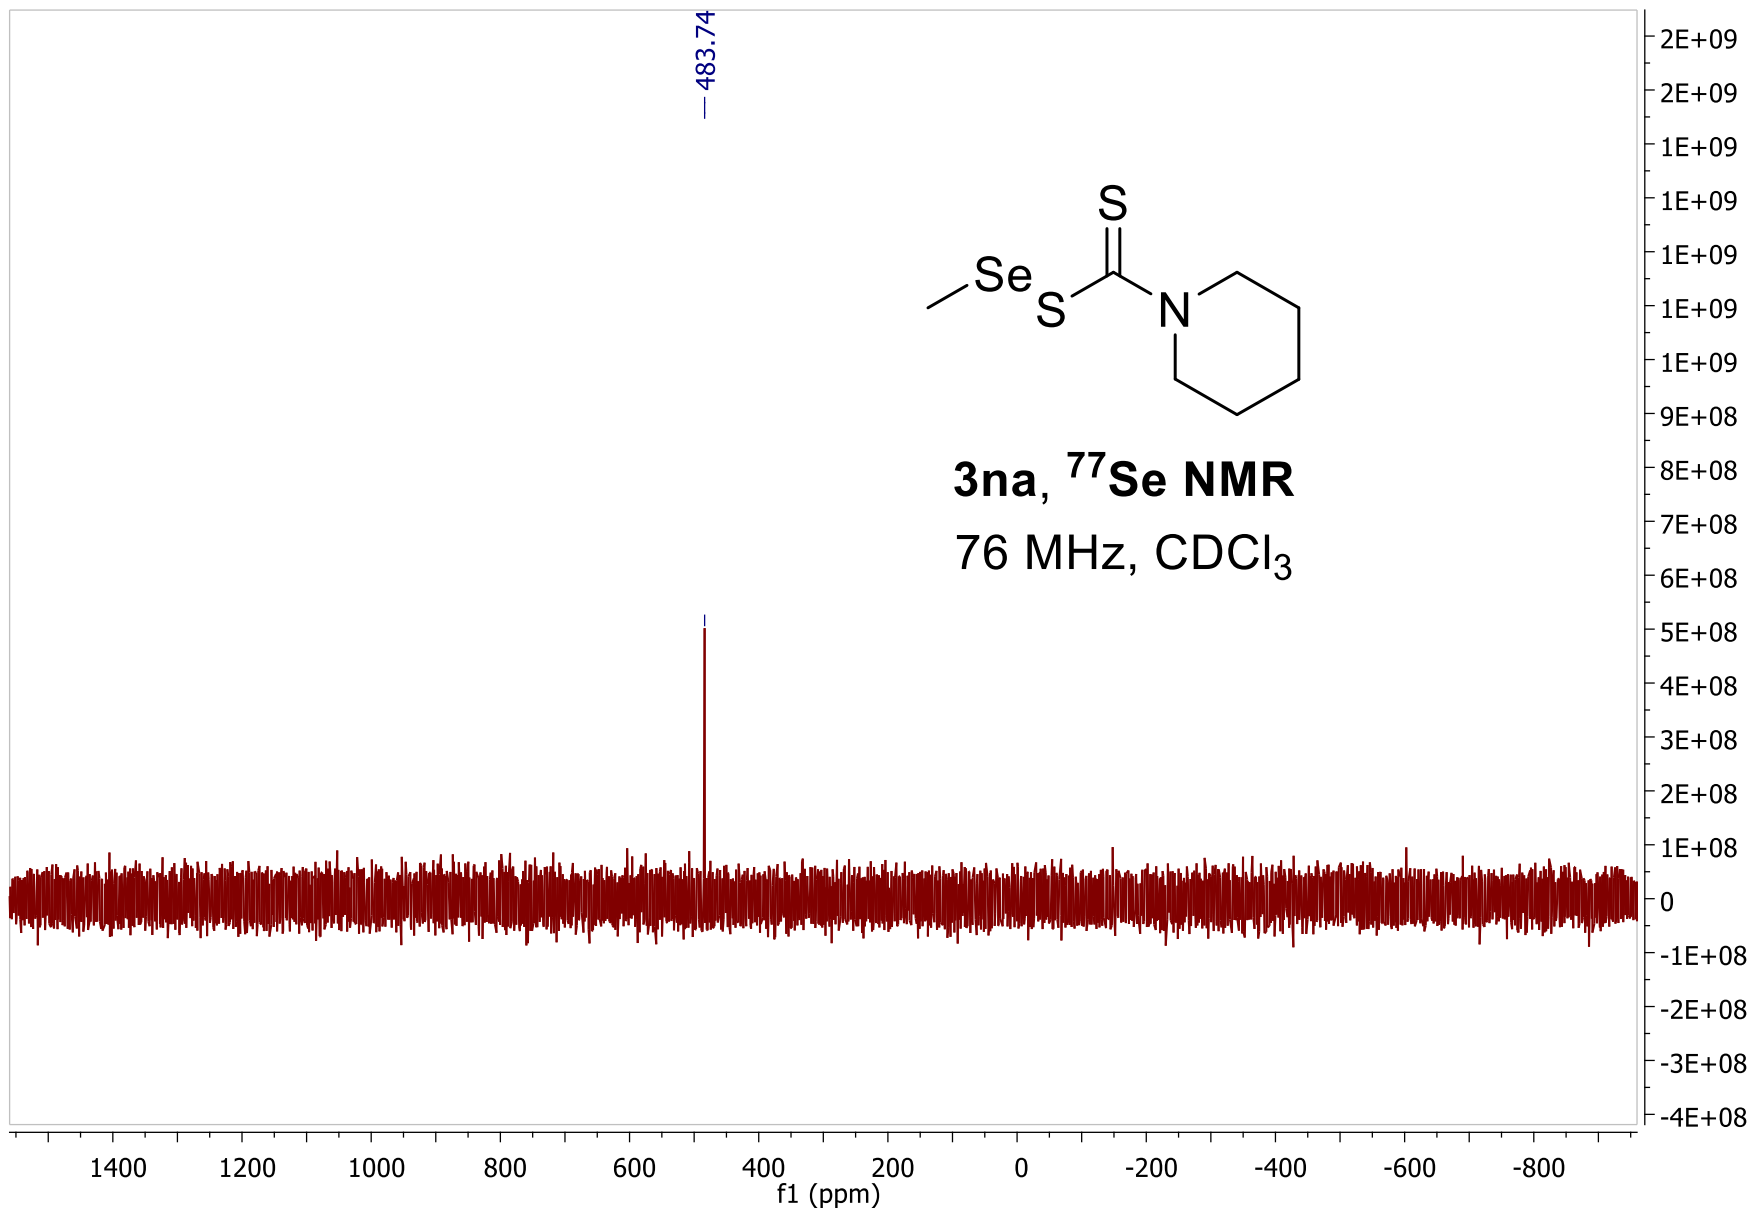

# Spectrum Plot Report

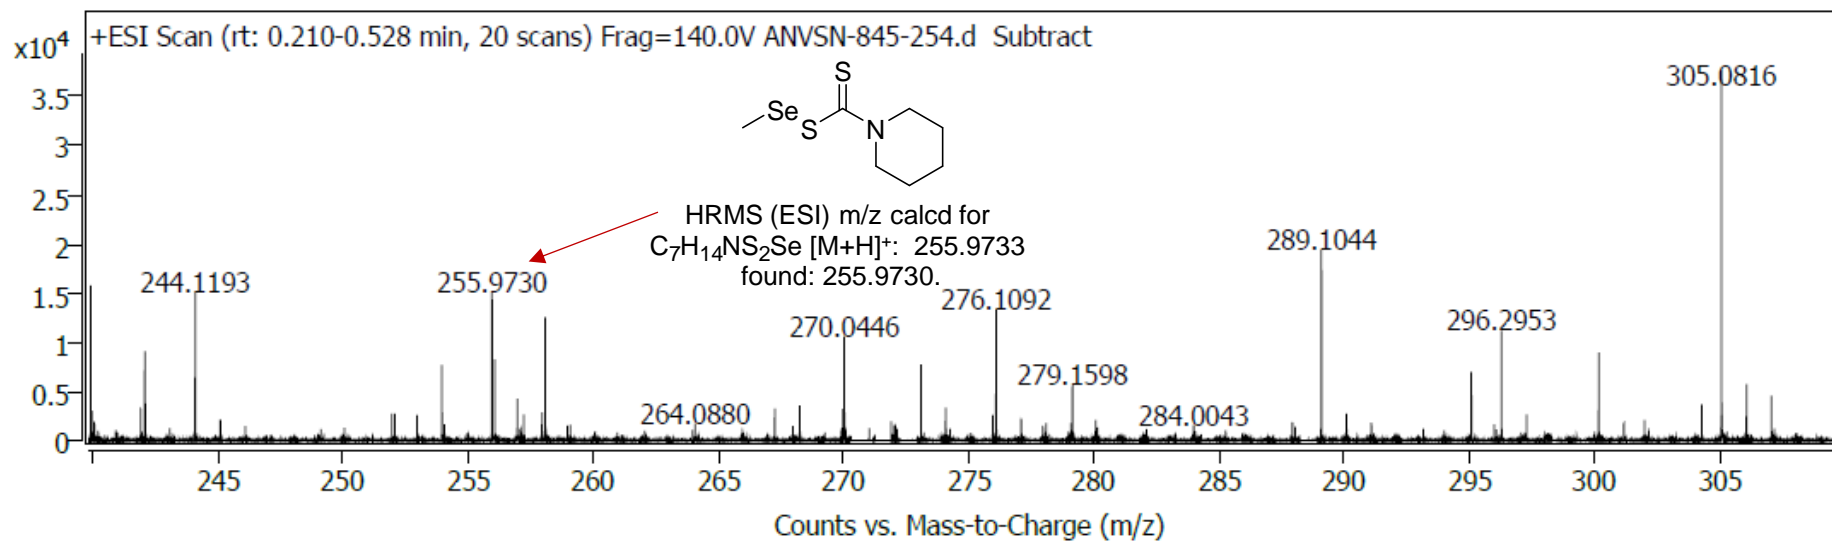

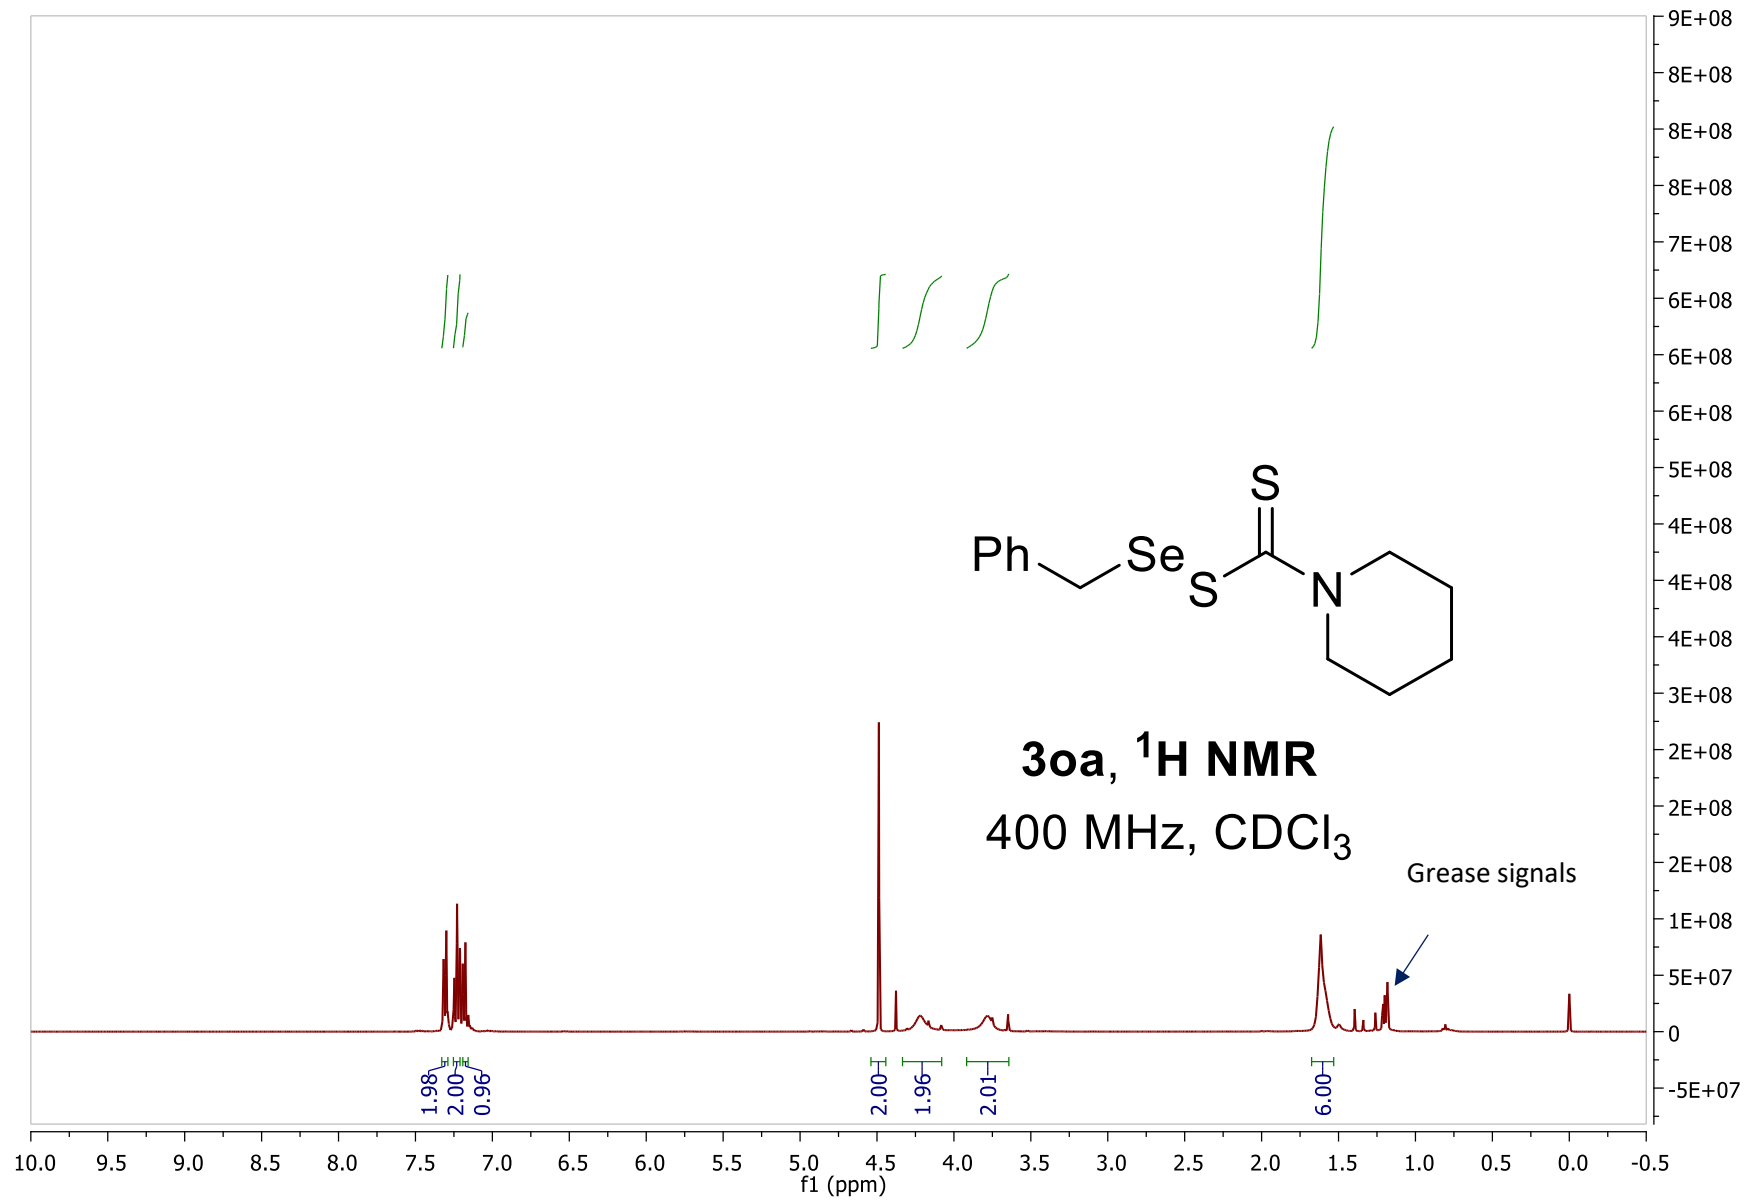

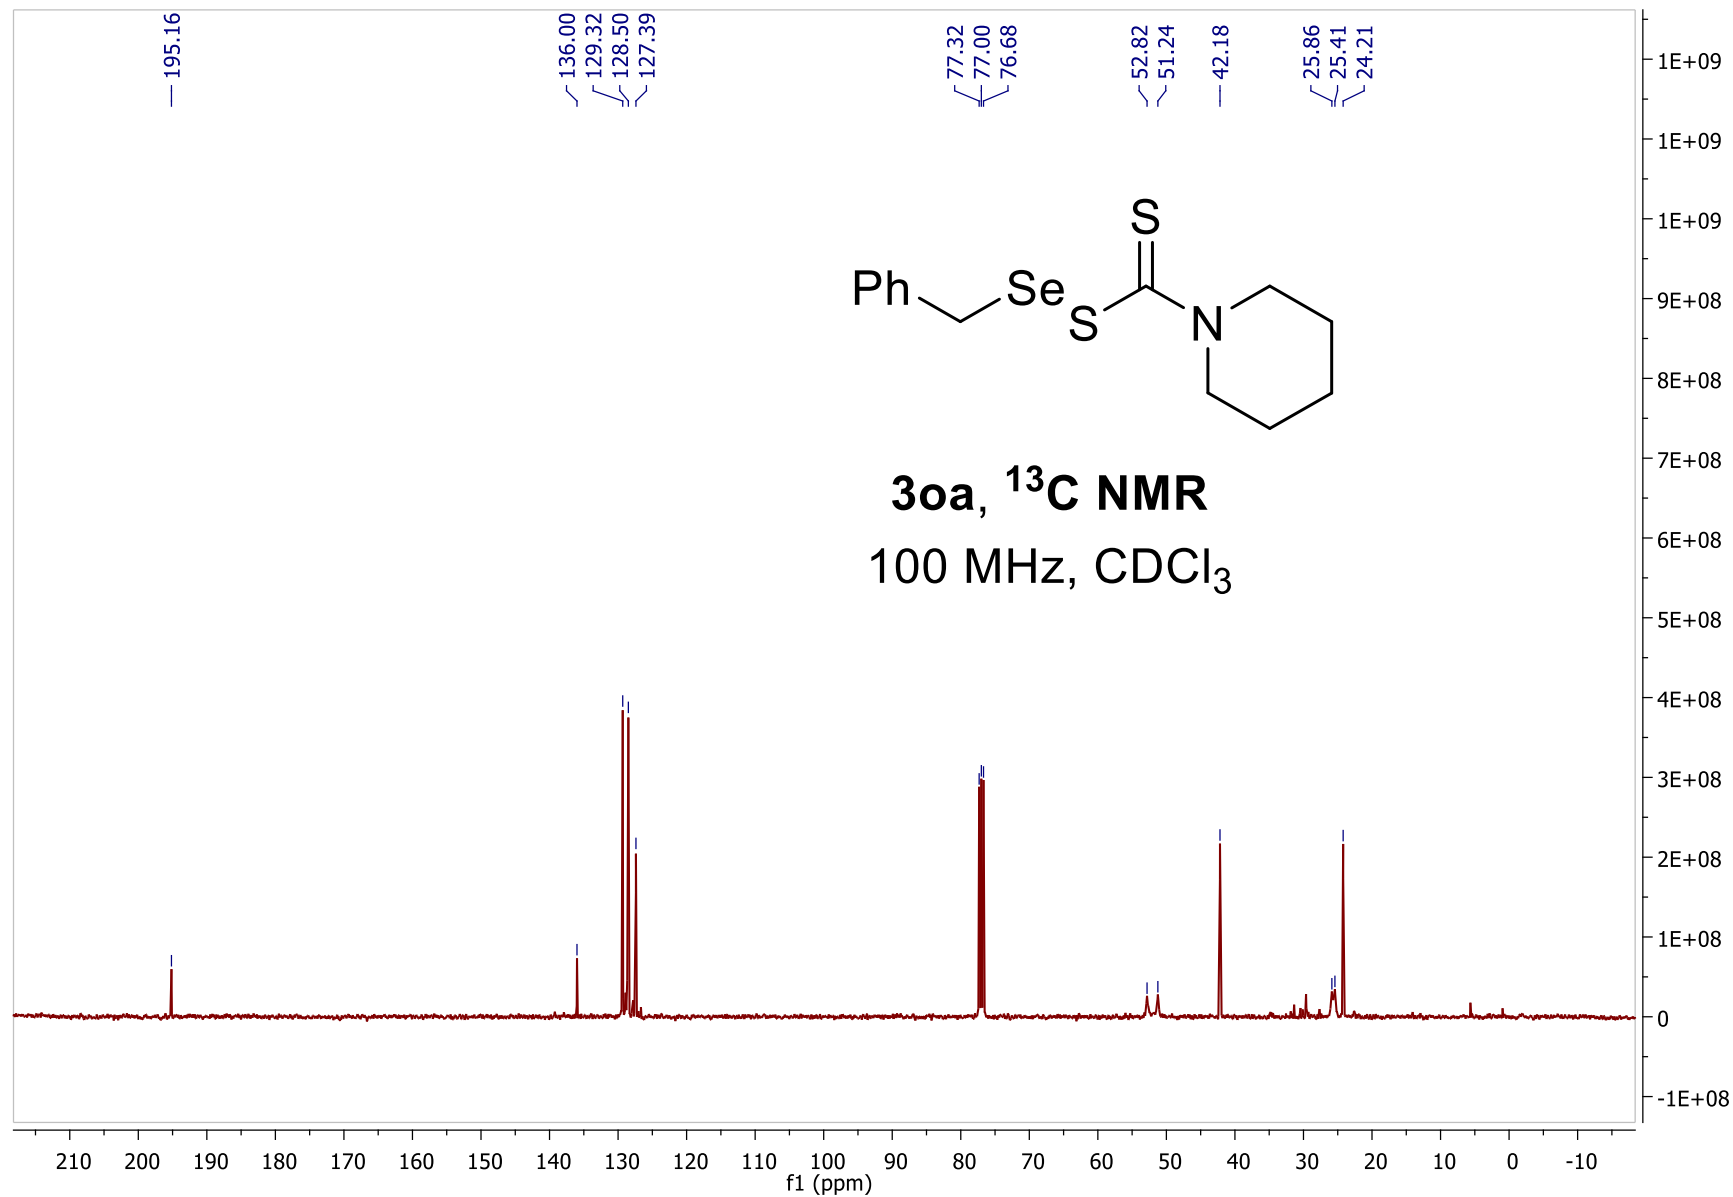

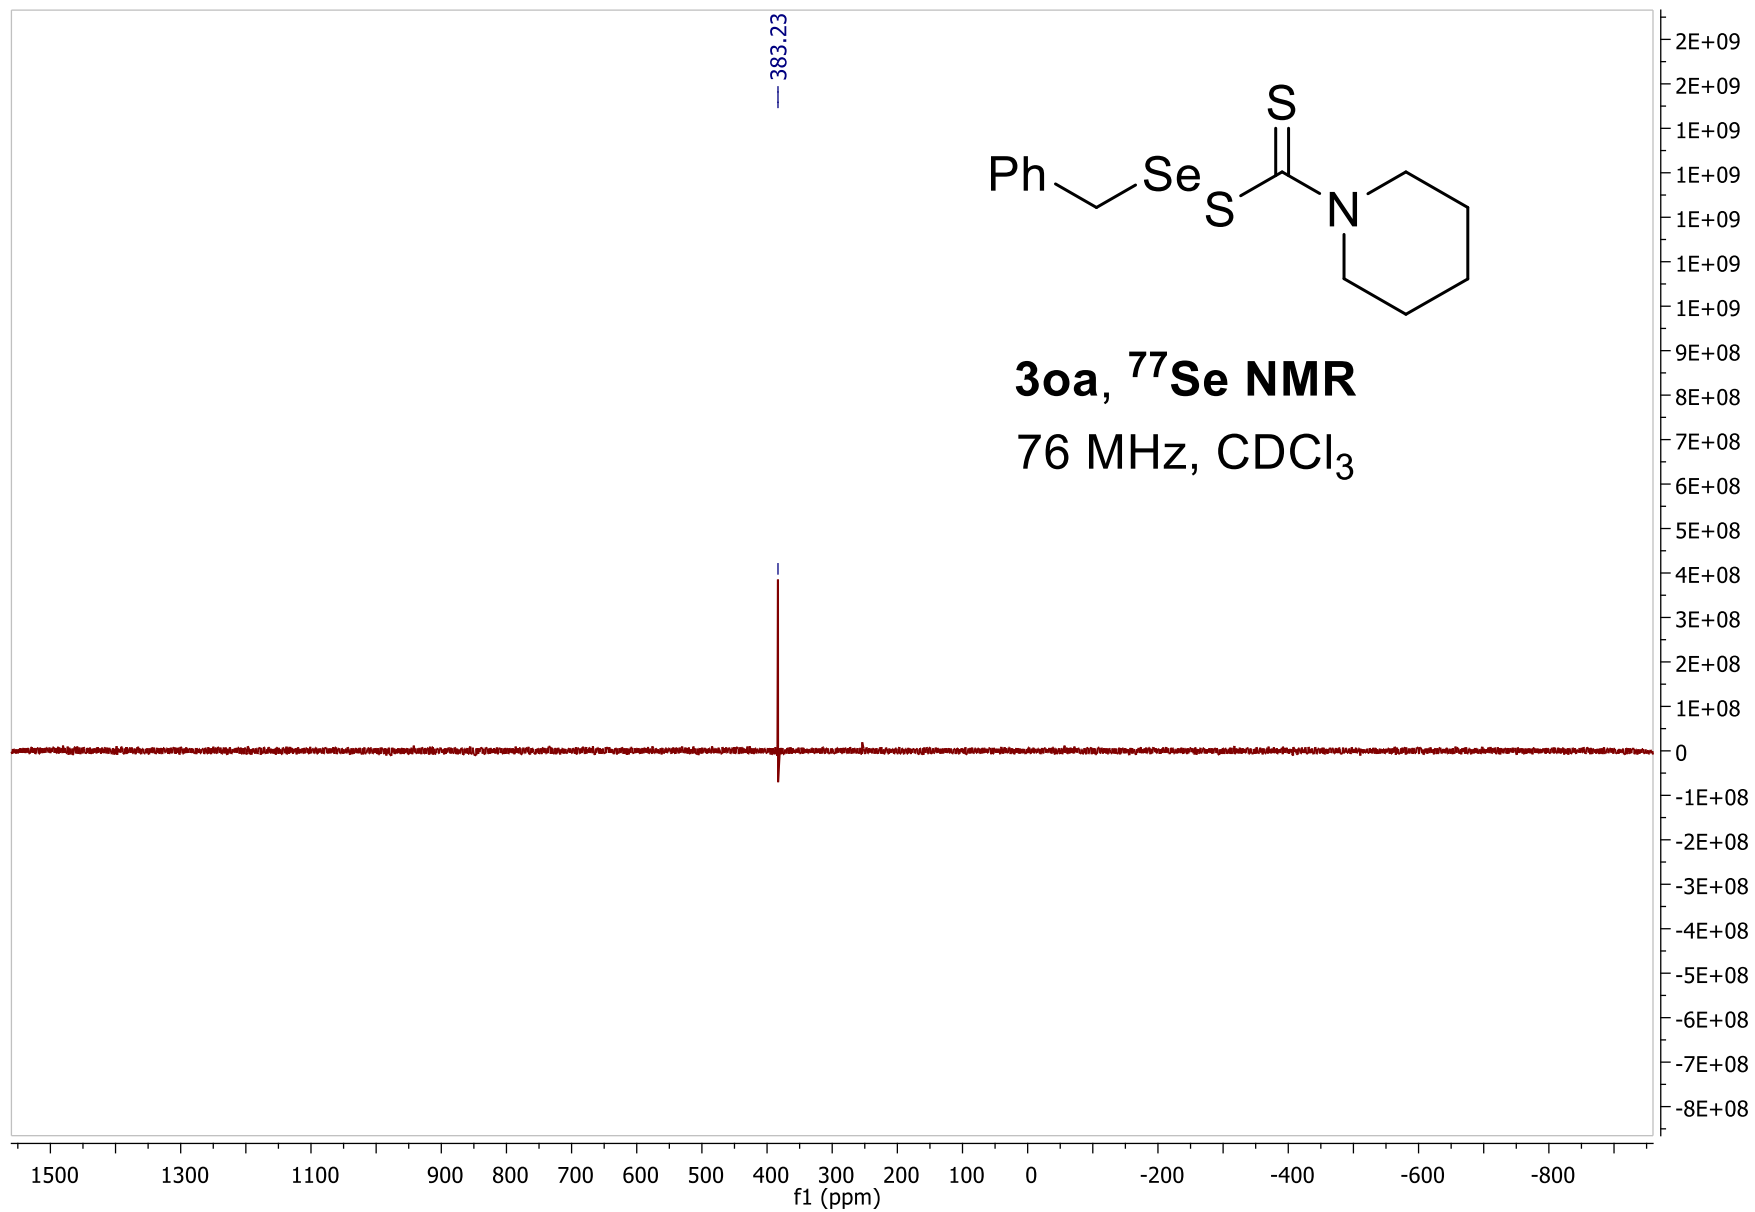

# Spectrum Plot Report

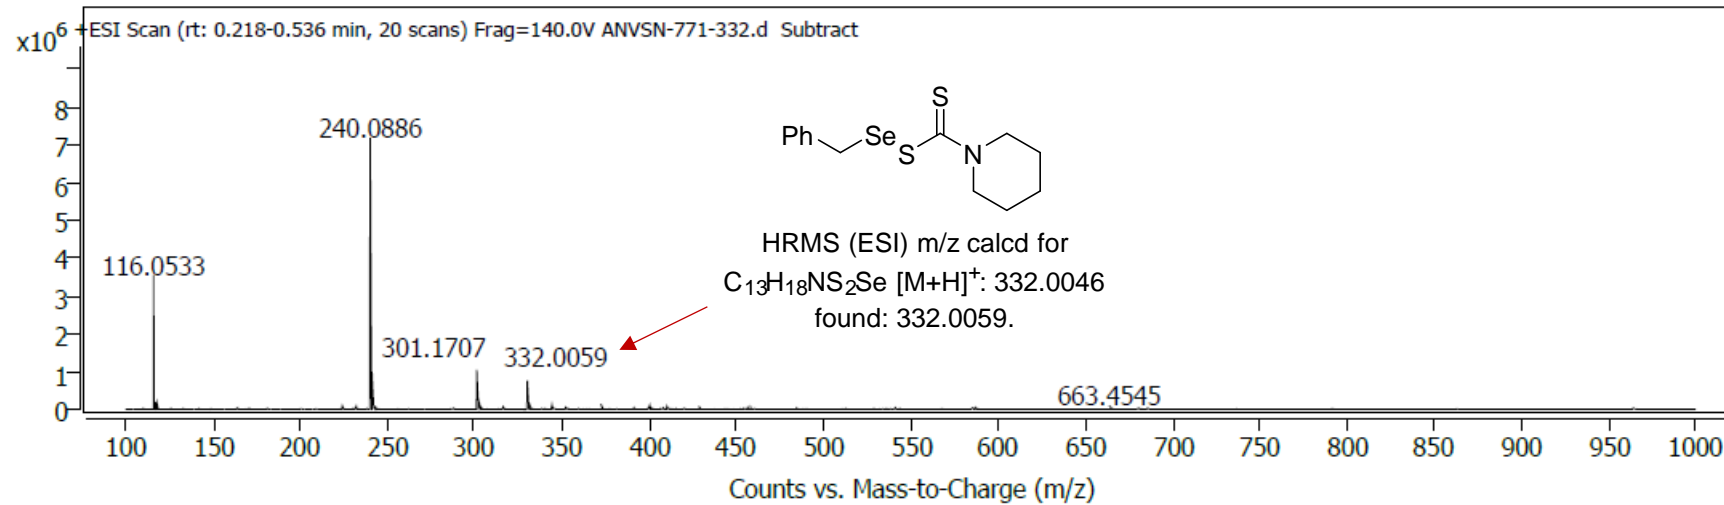

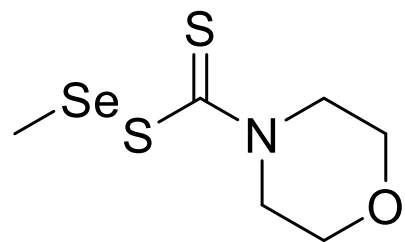

**3nb, <sup>1</sup>H NMR**  
400 MHz, DMSO-d<sub>6</sub>

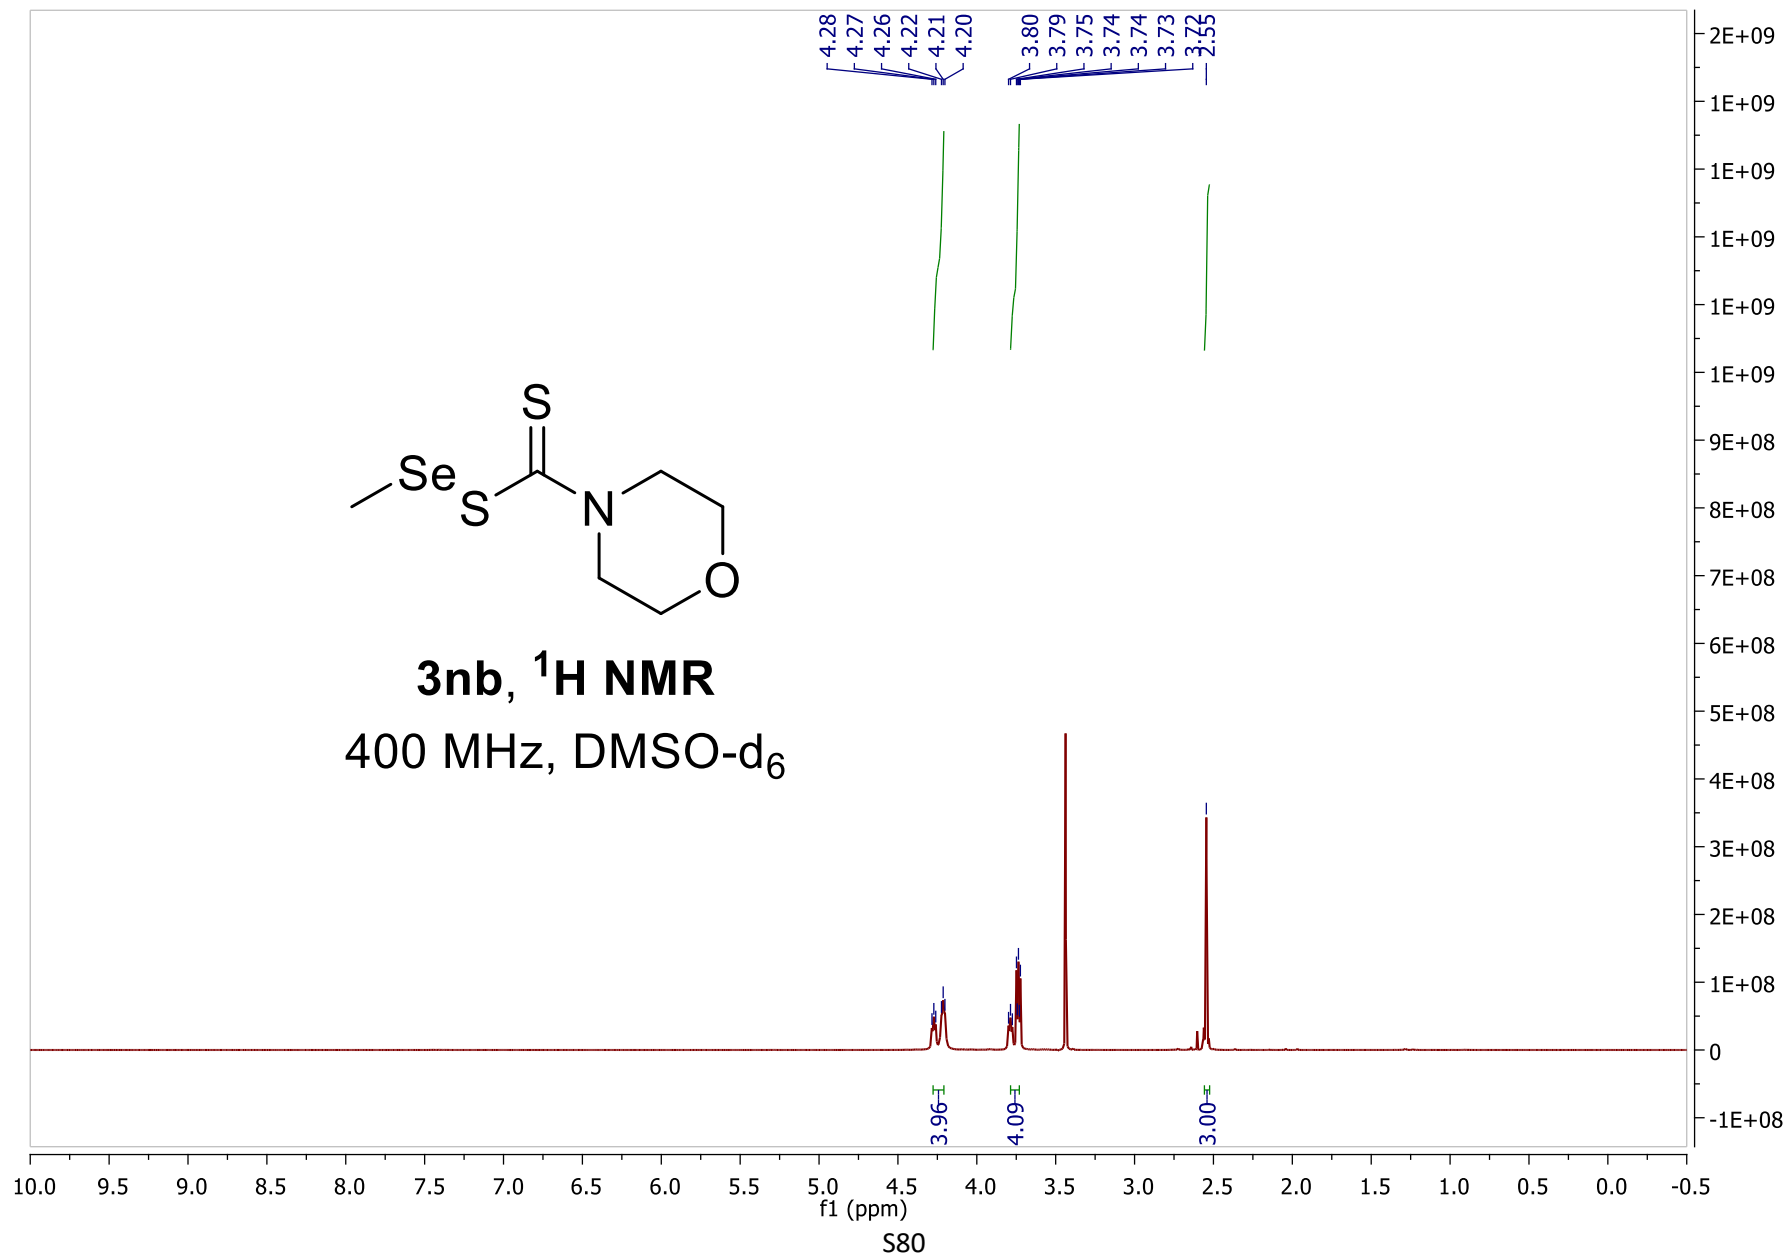



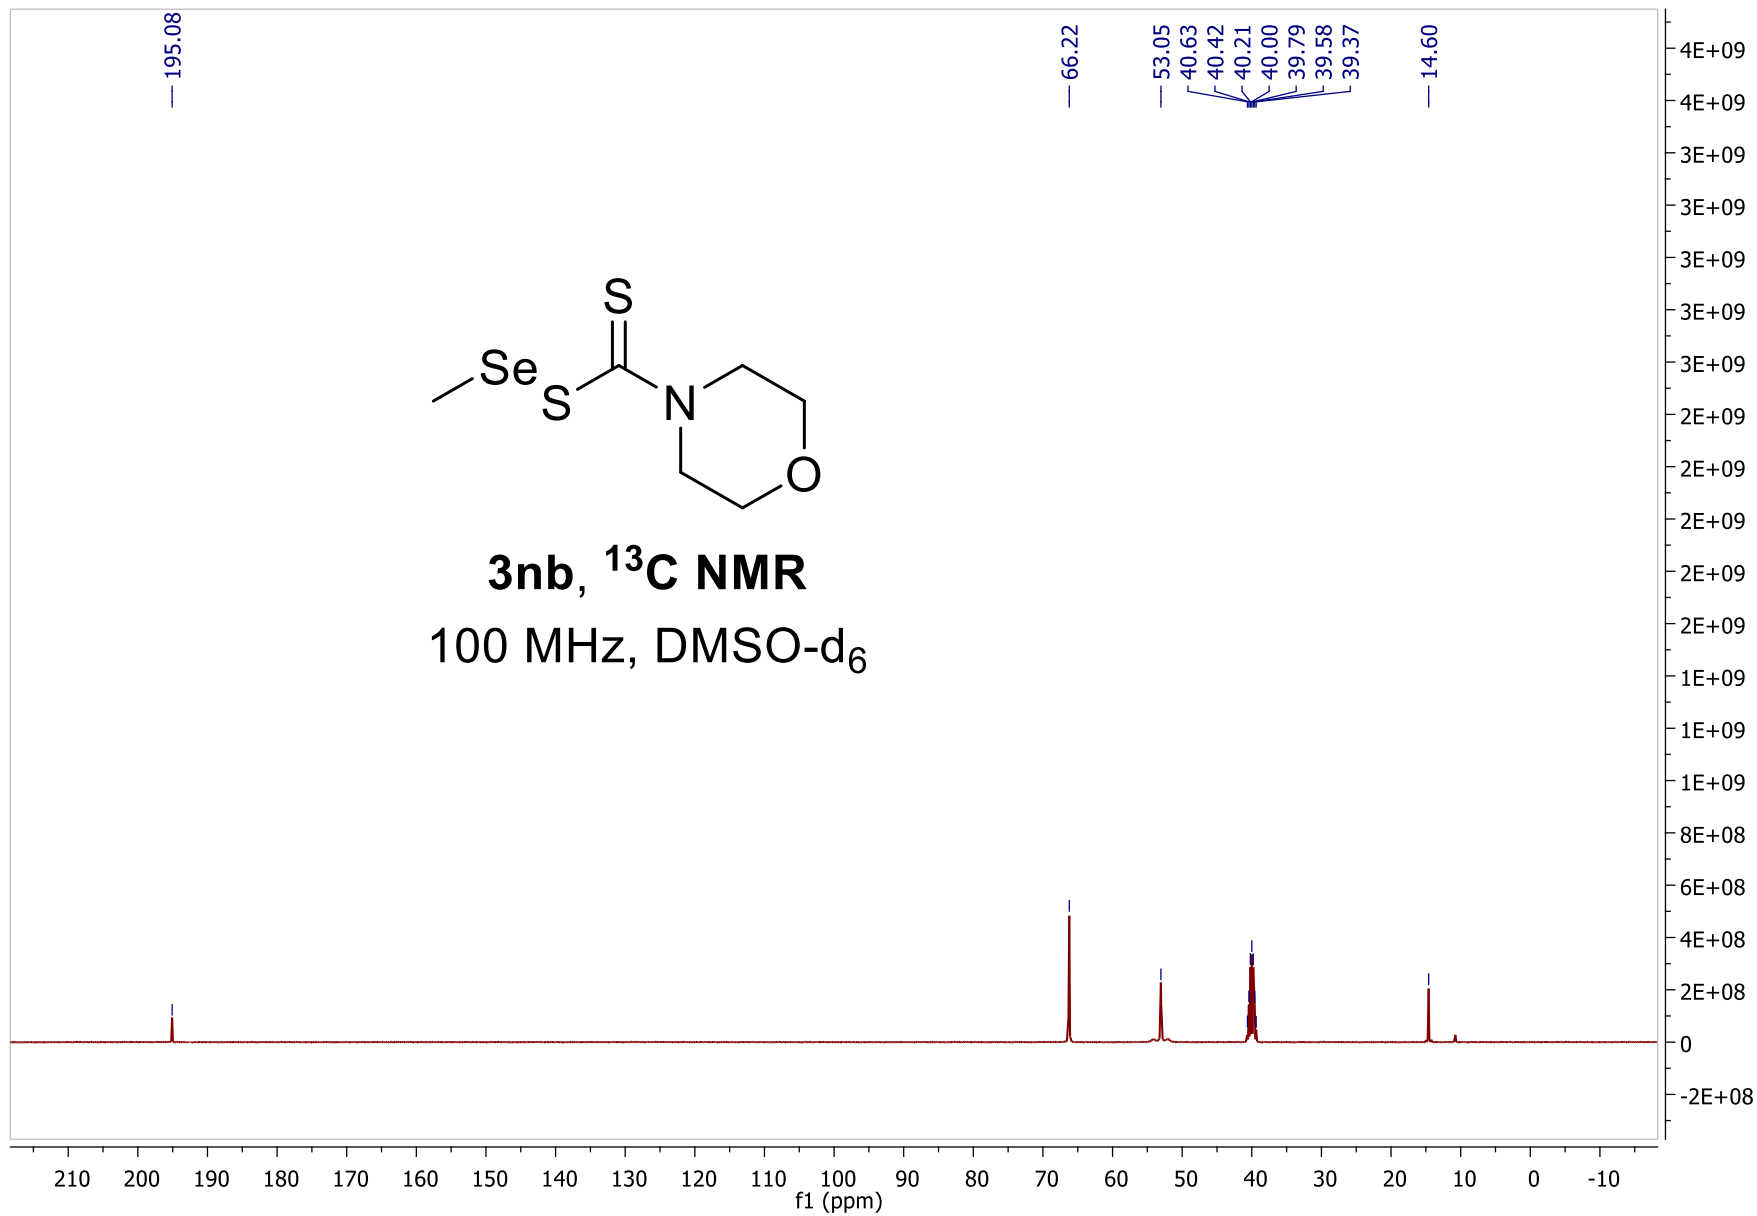

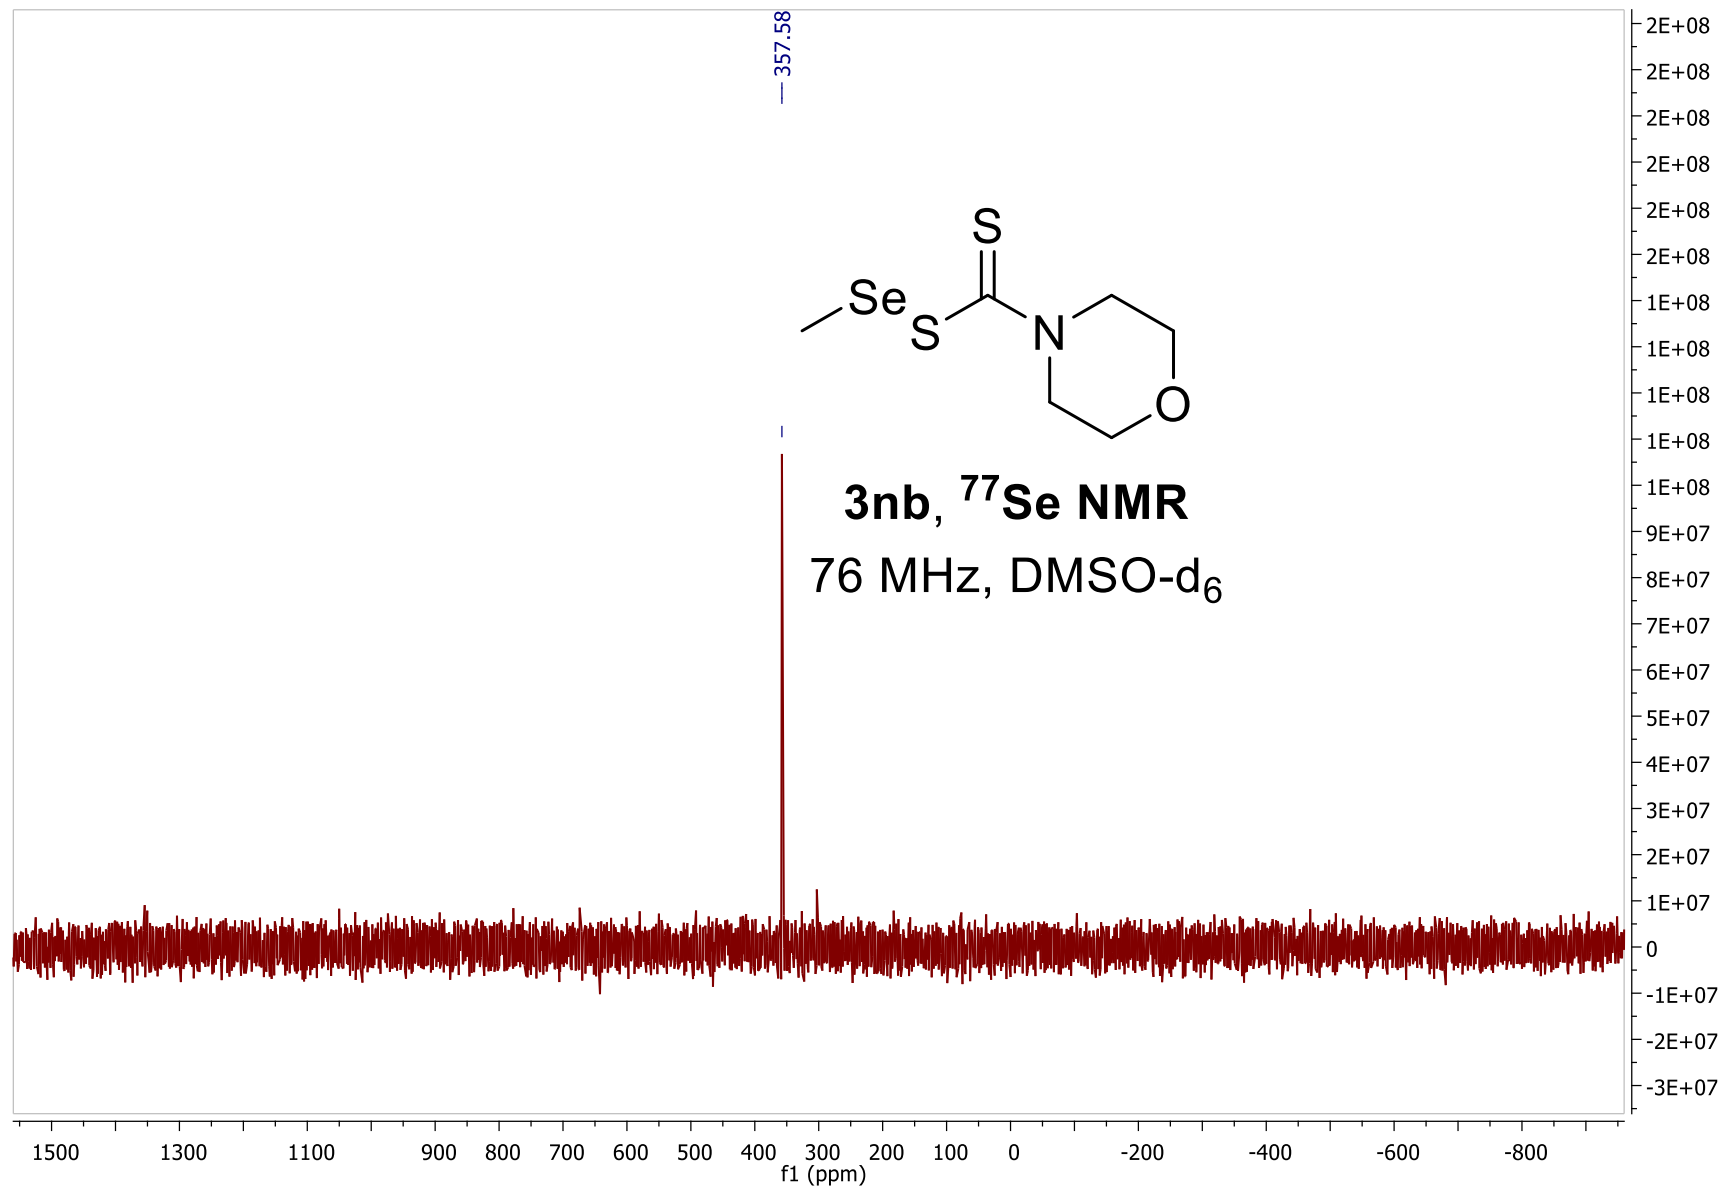

# Spectrum Plot Report

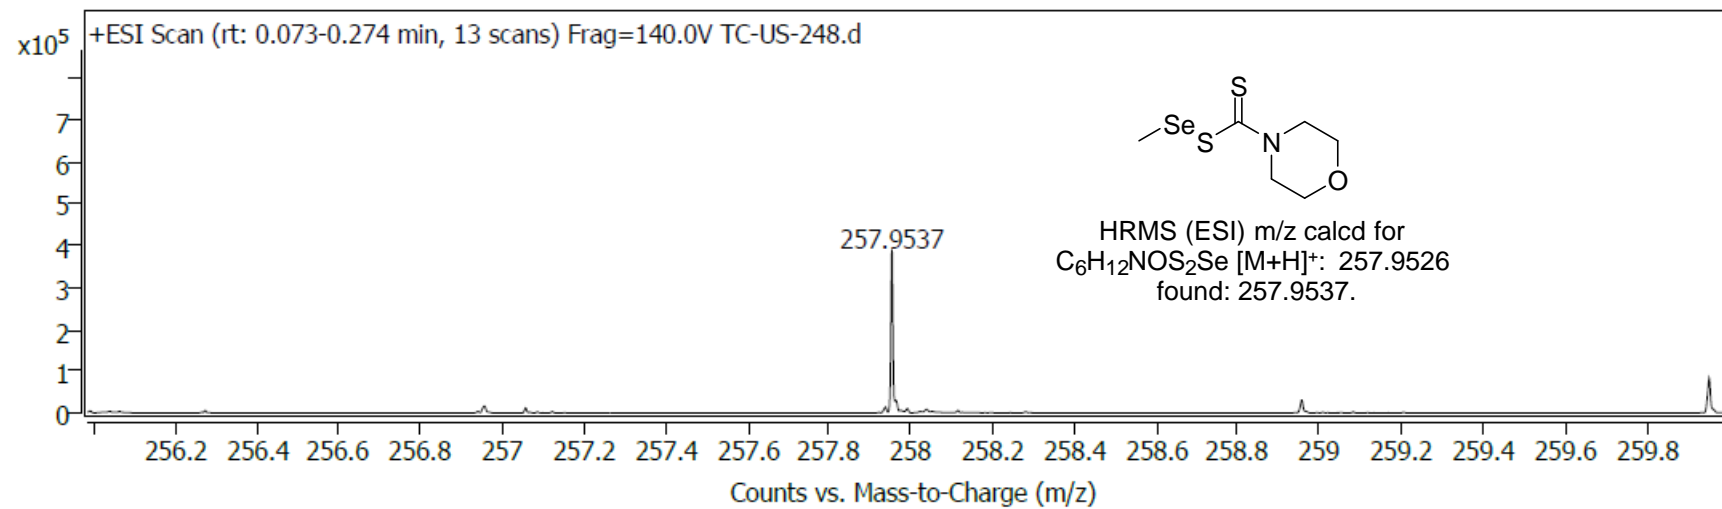

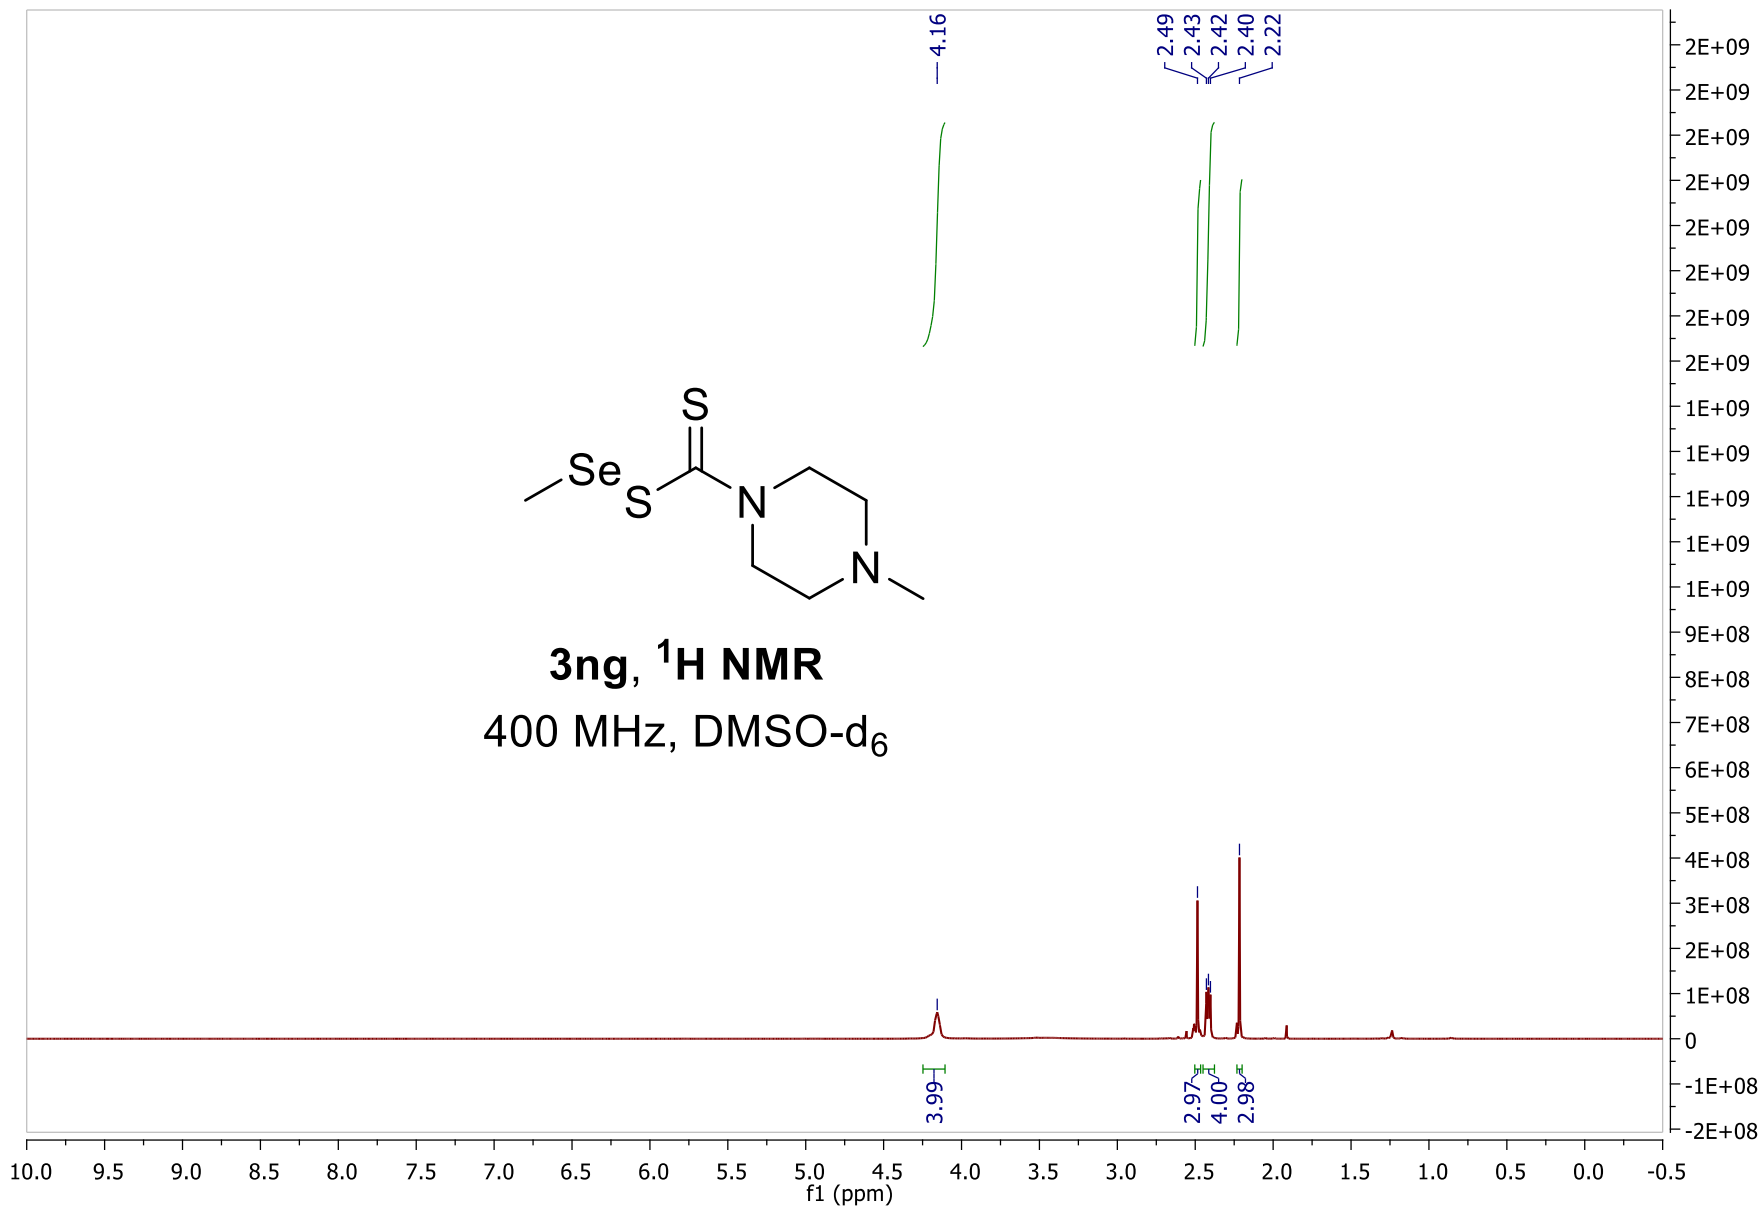

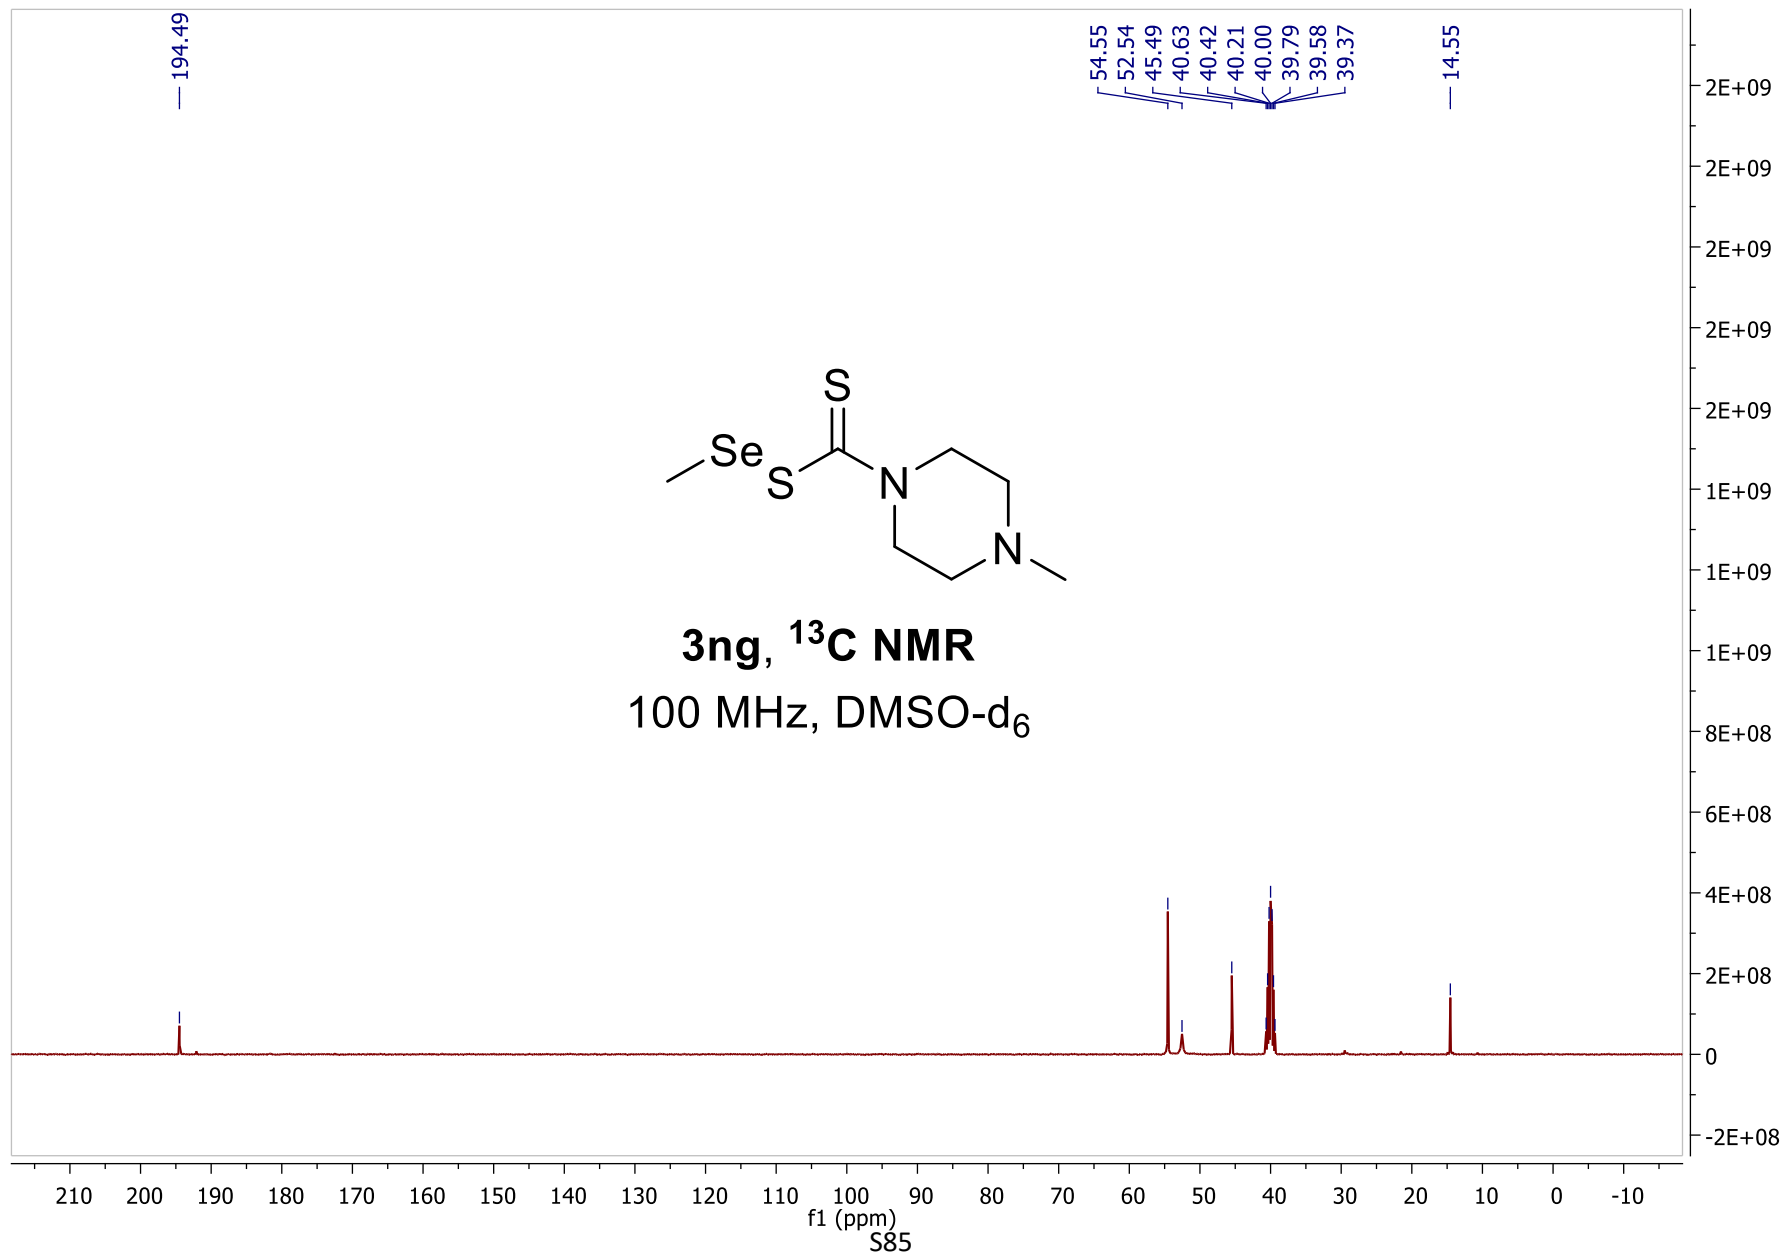

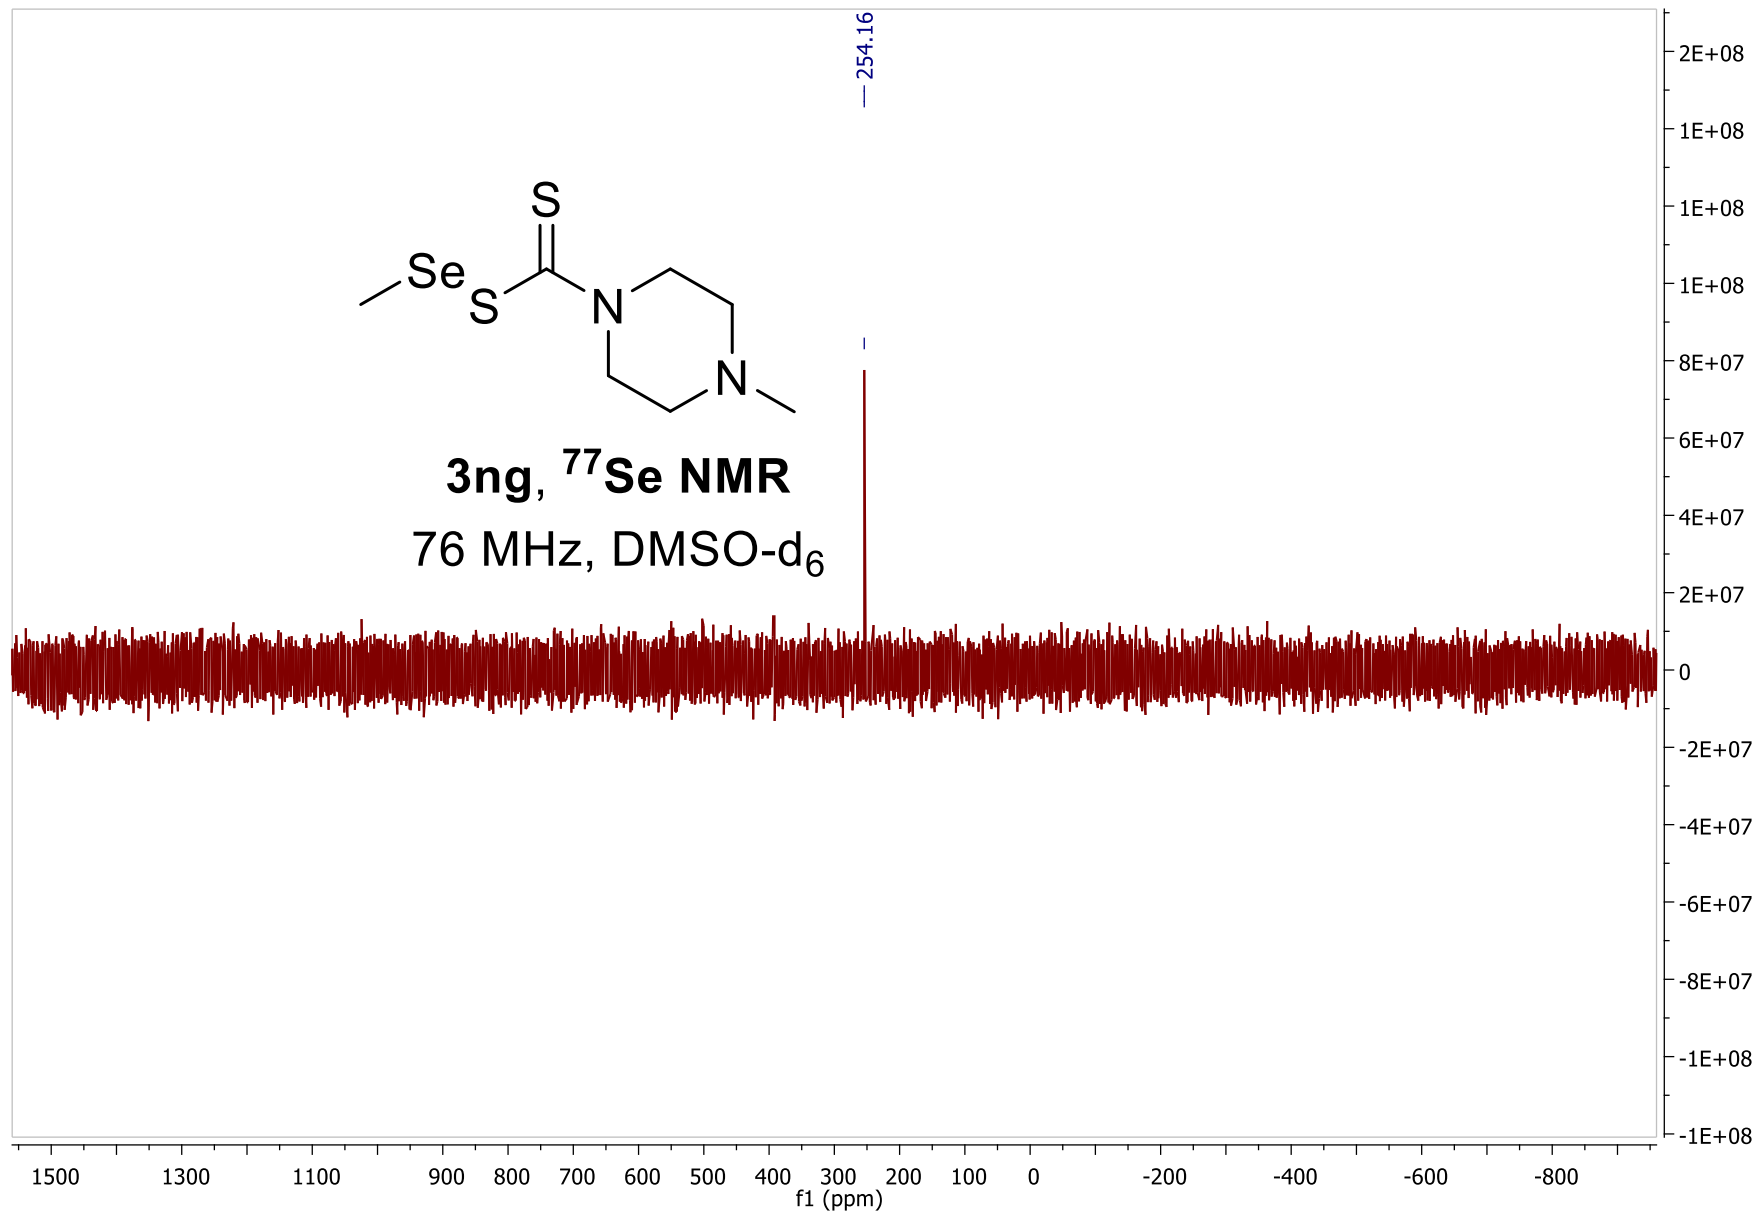

# Spectrum Plot Report

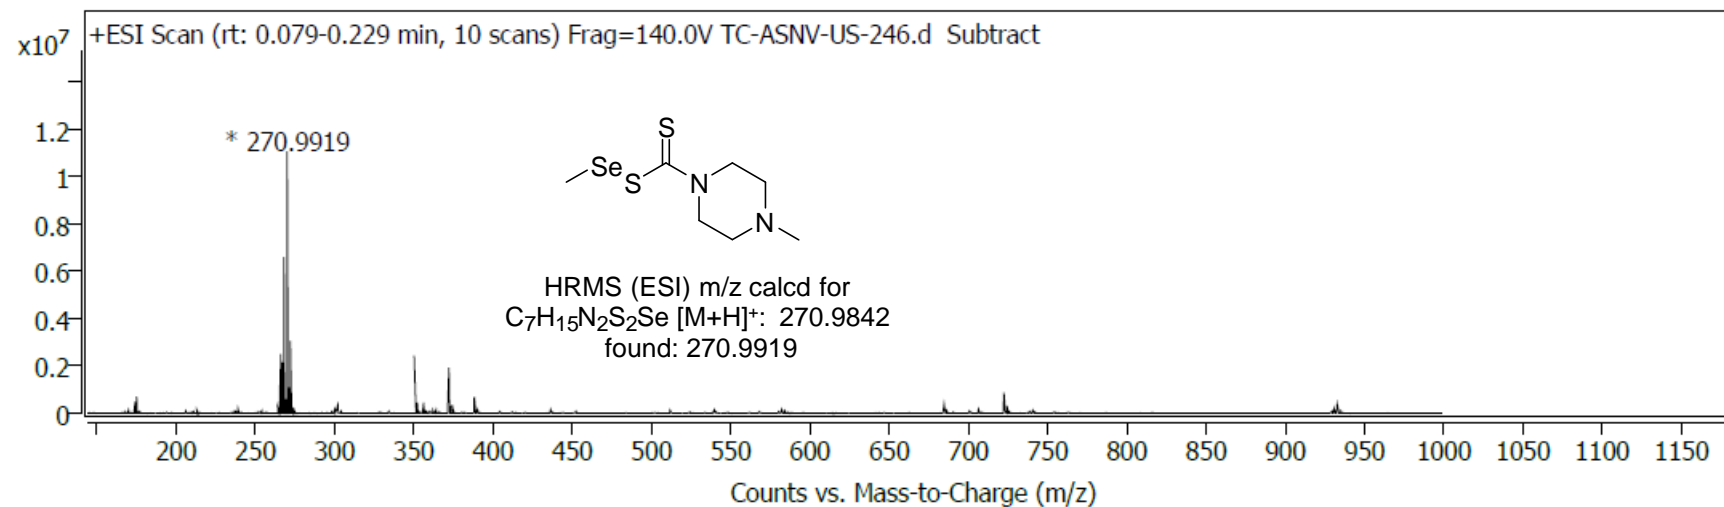

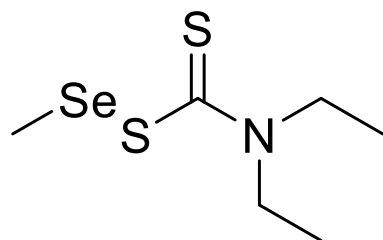

3rd,  $^{13}\text{C}$  NMR  
100 MHz,  $\text{CDCl}_3$

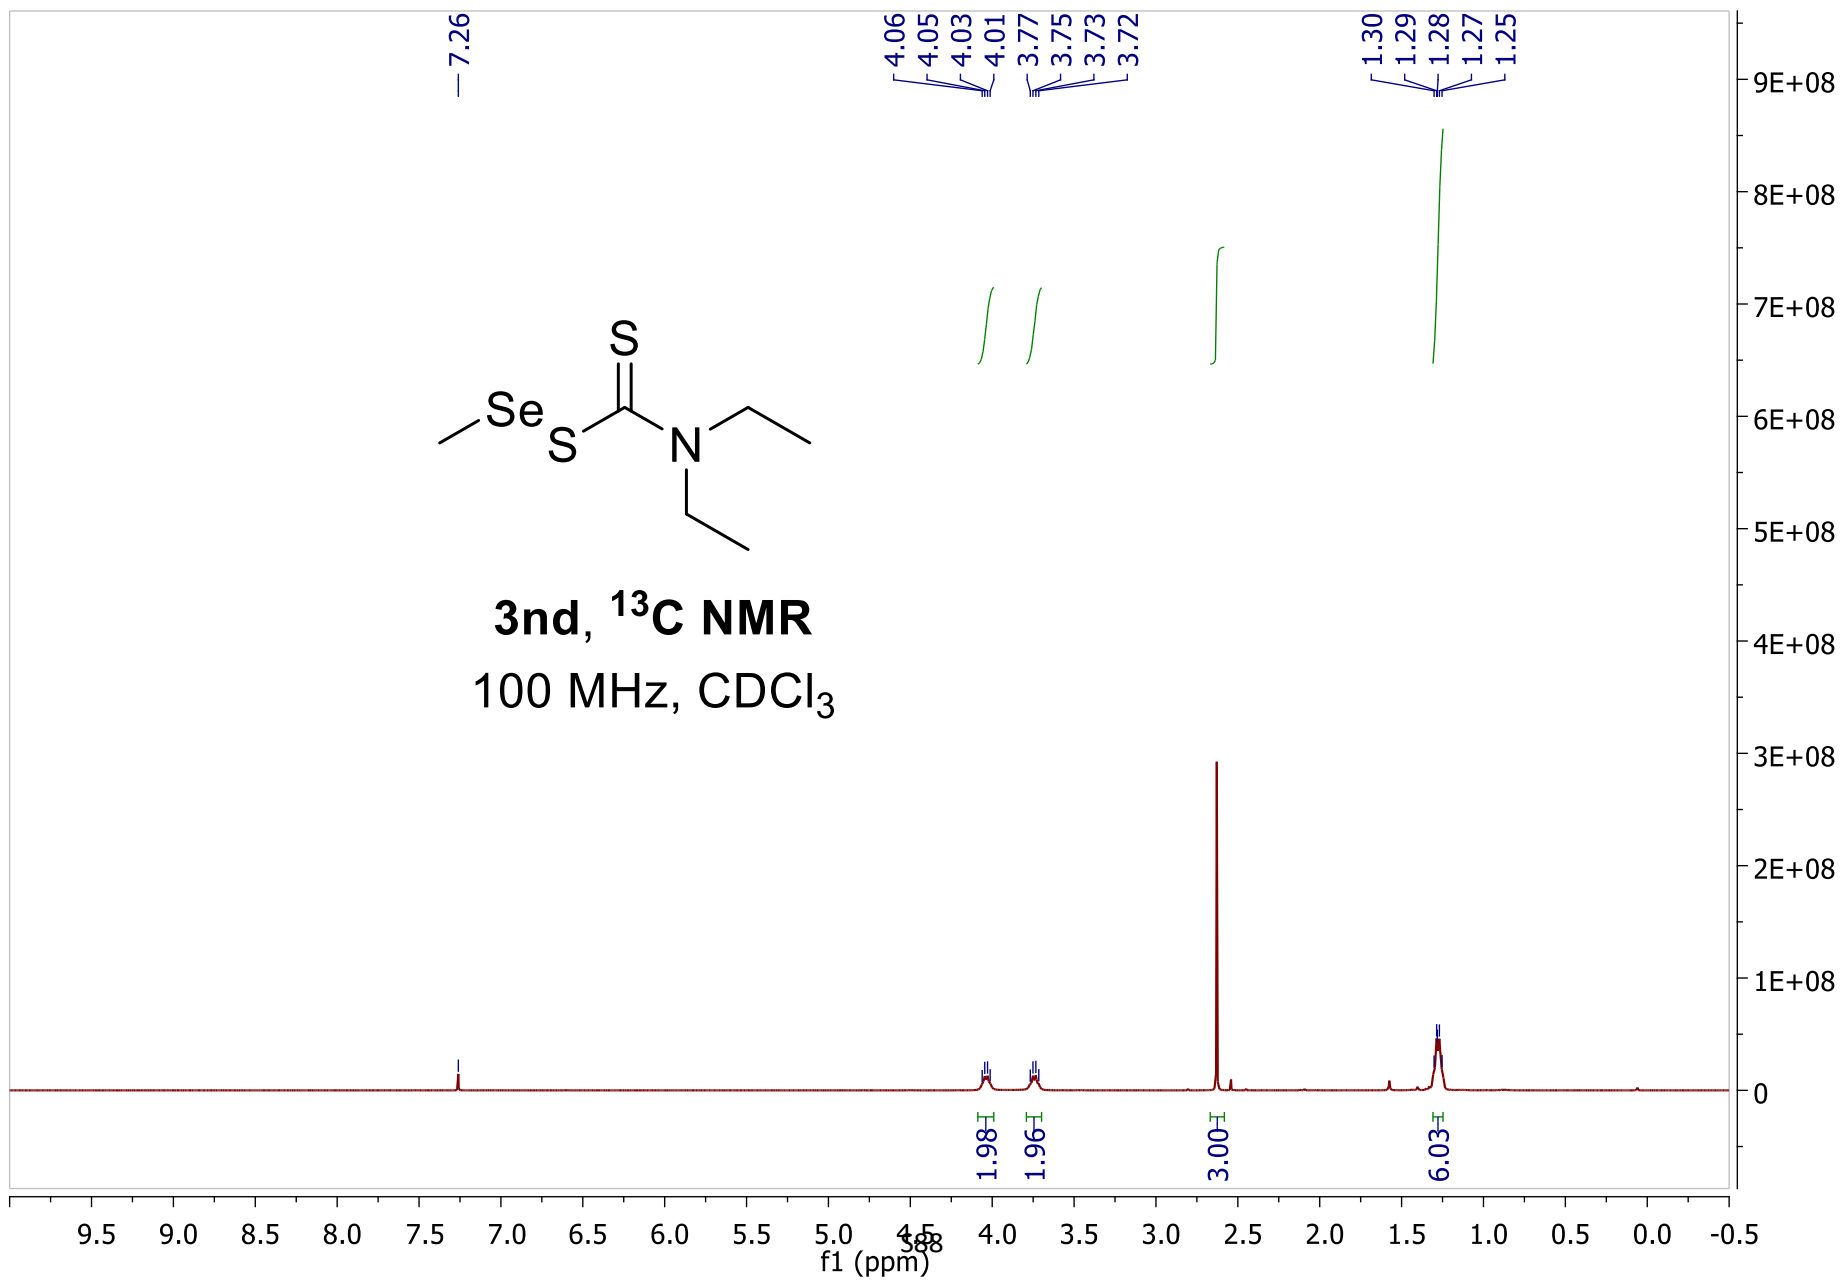



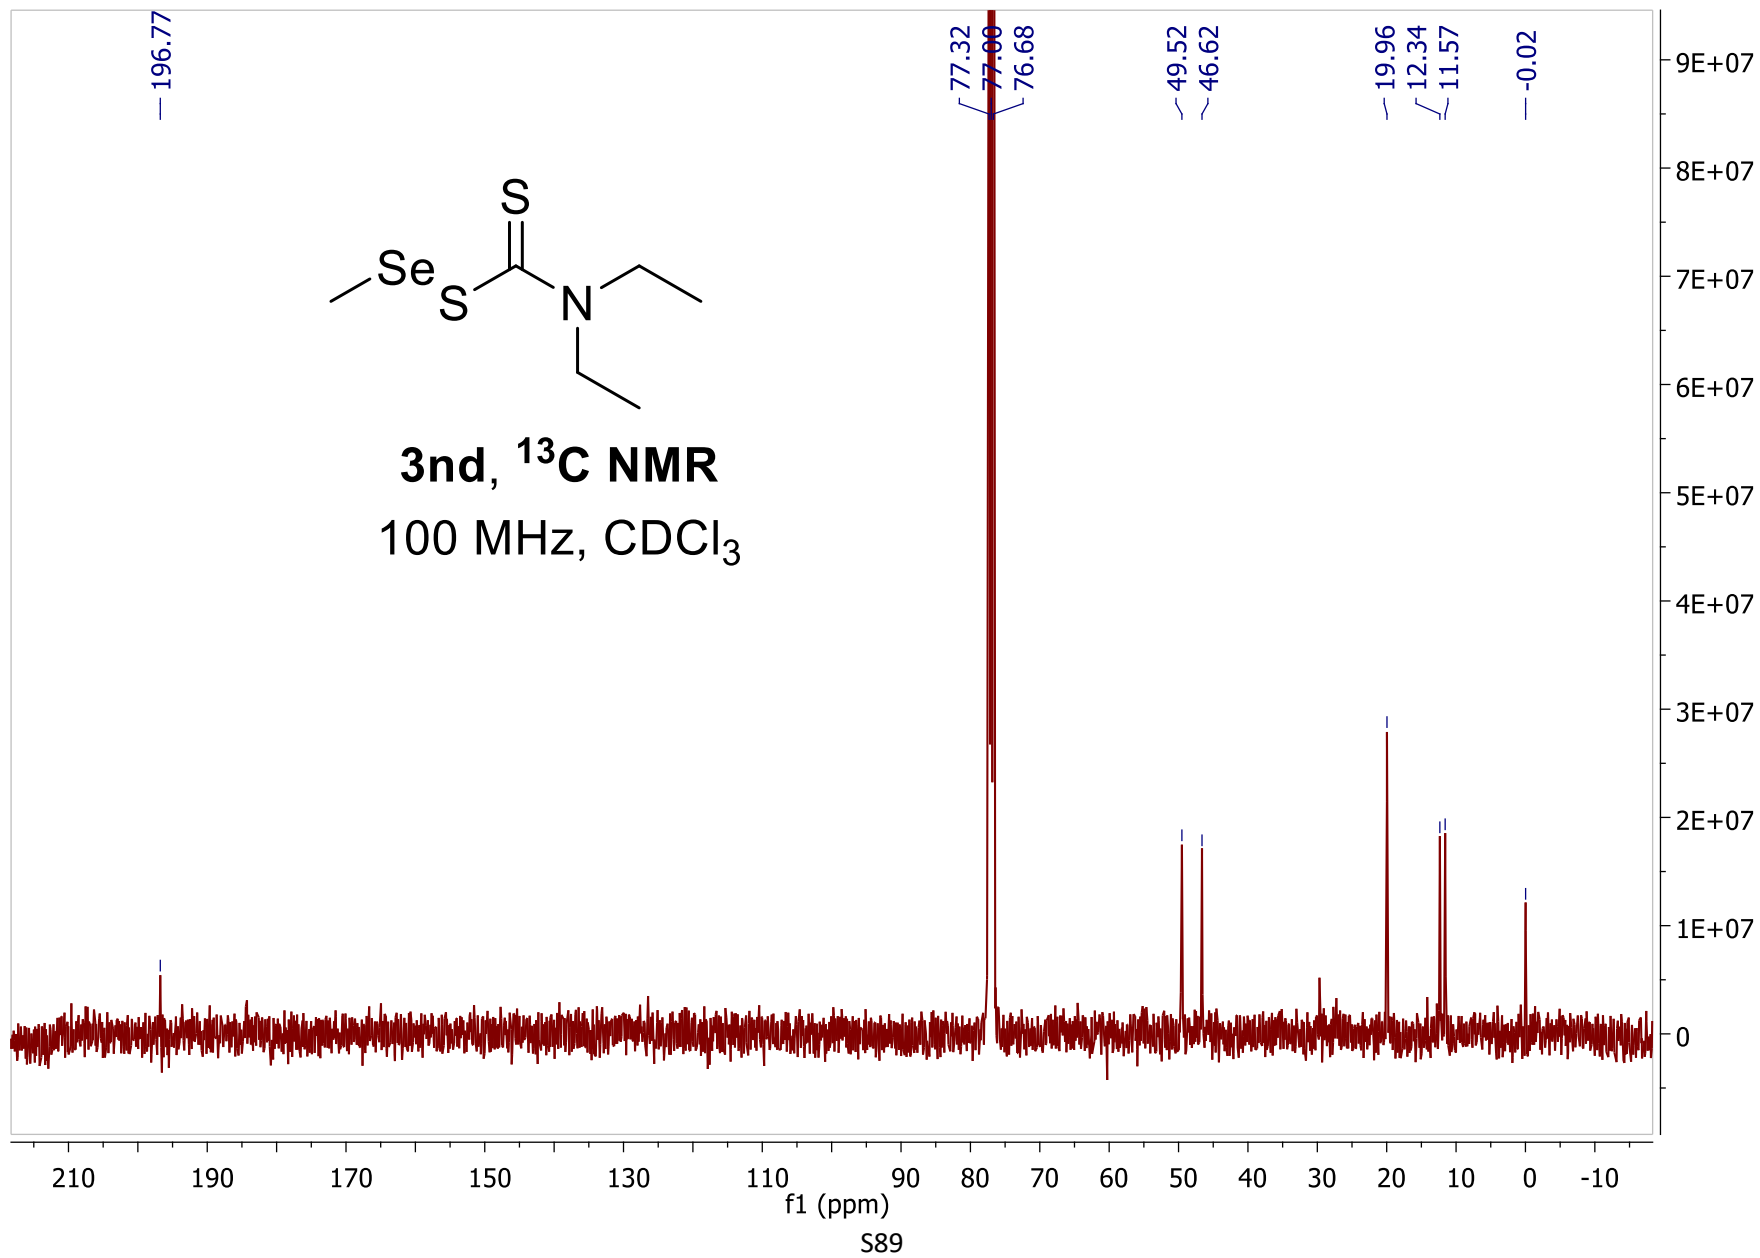

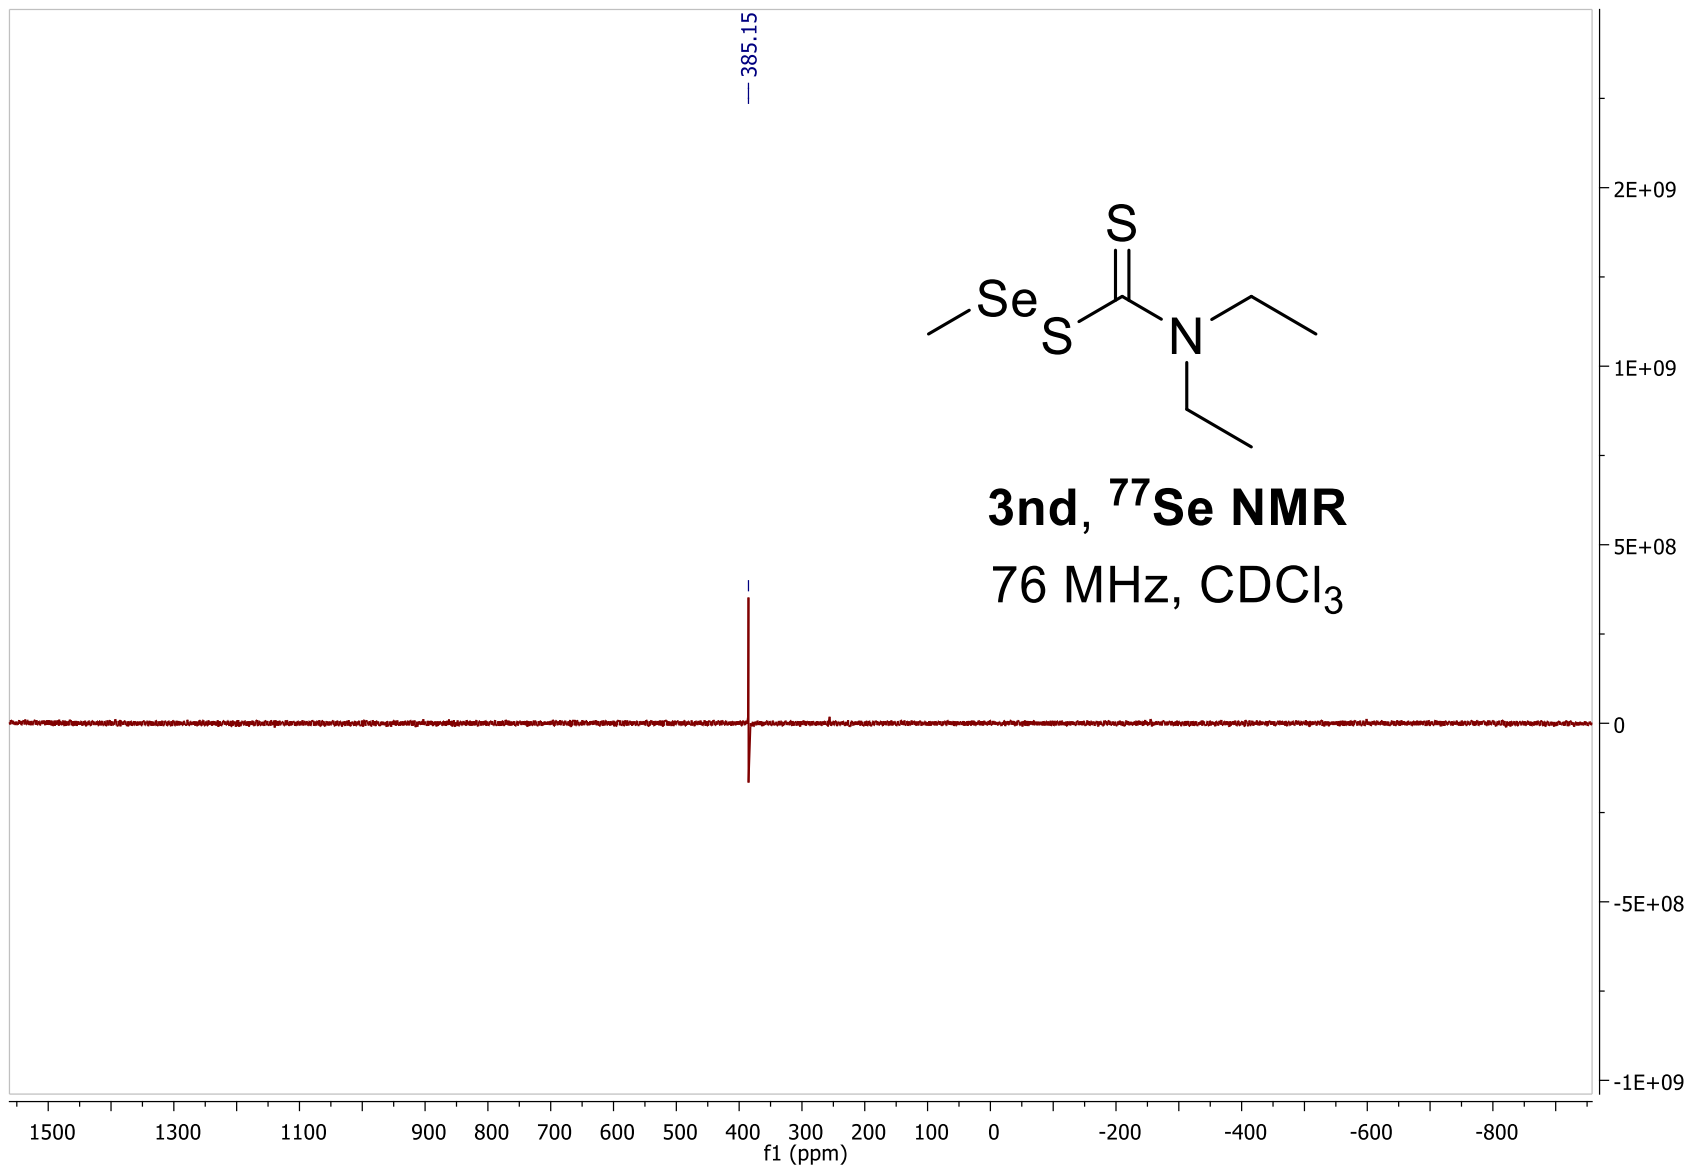

# Spectrum Plot Report

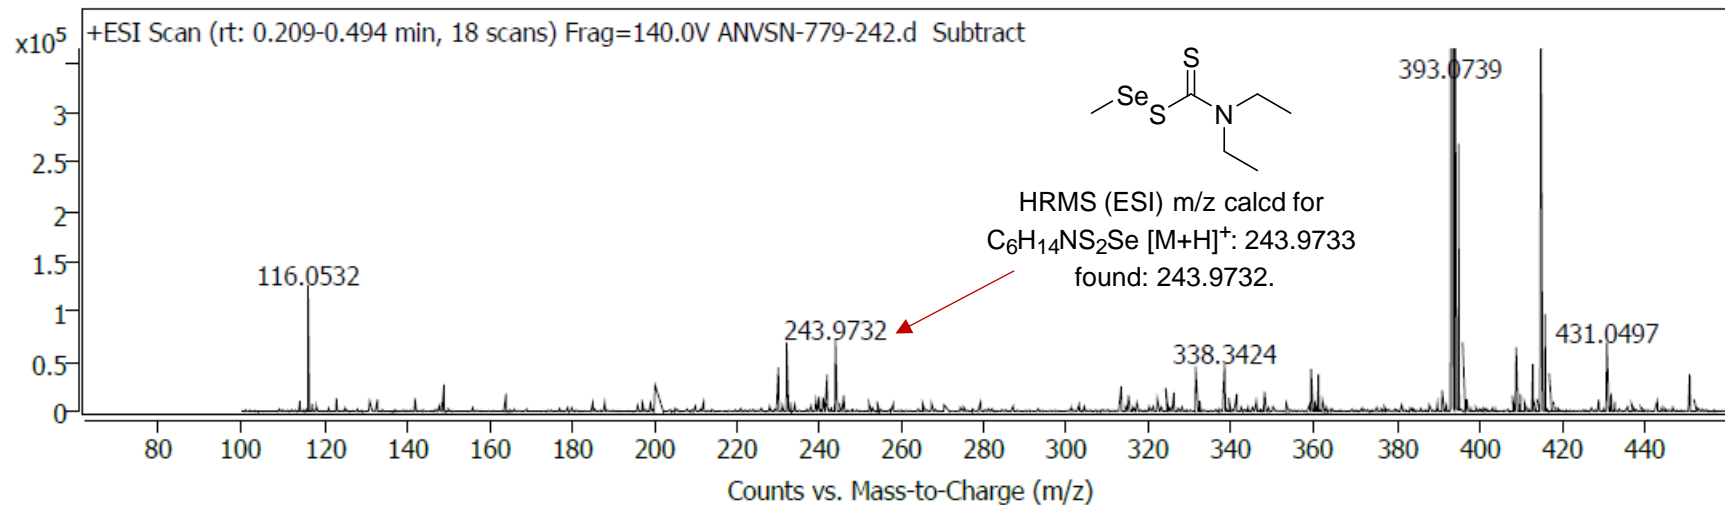

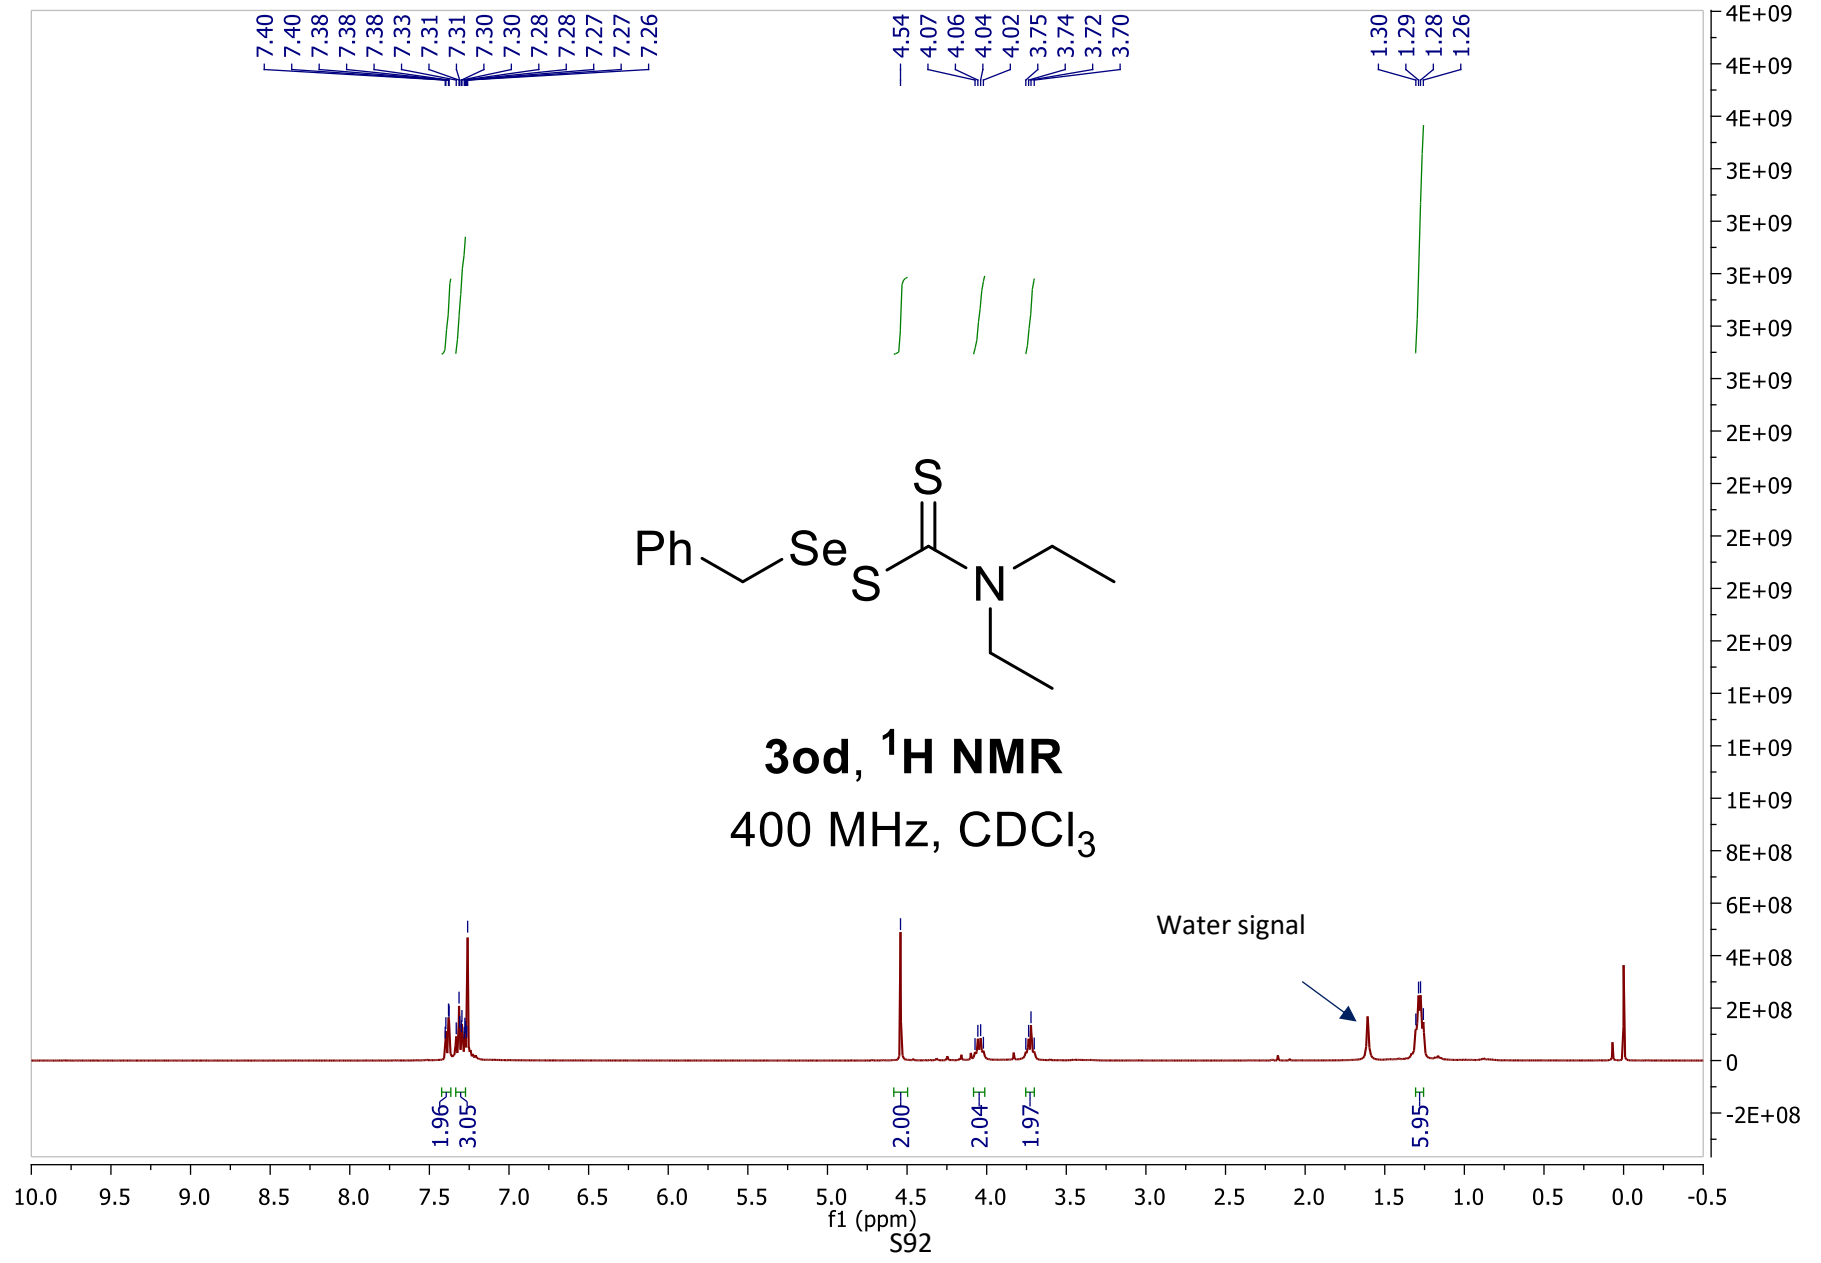

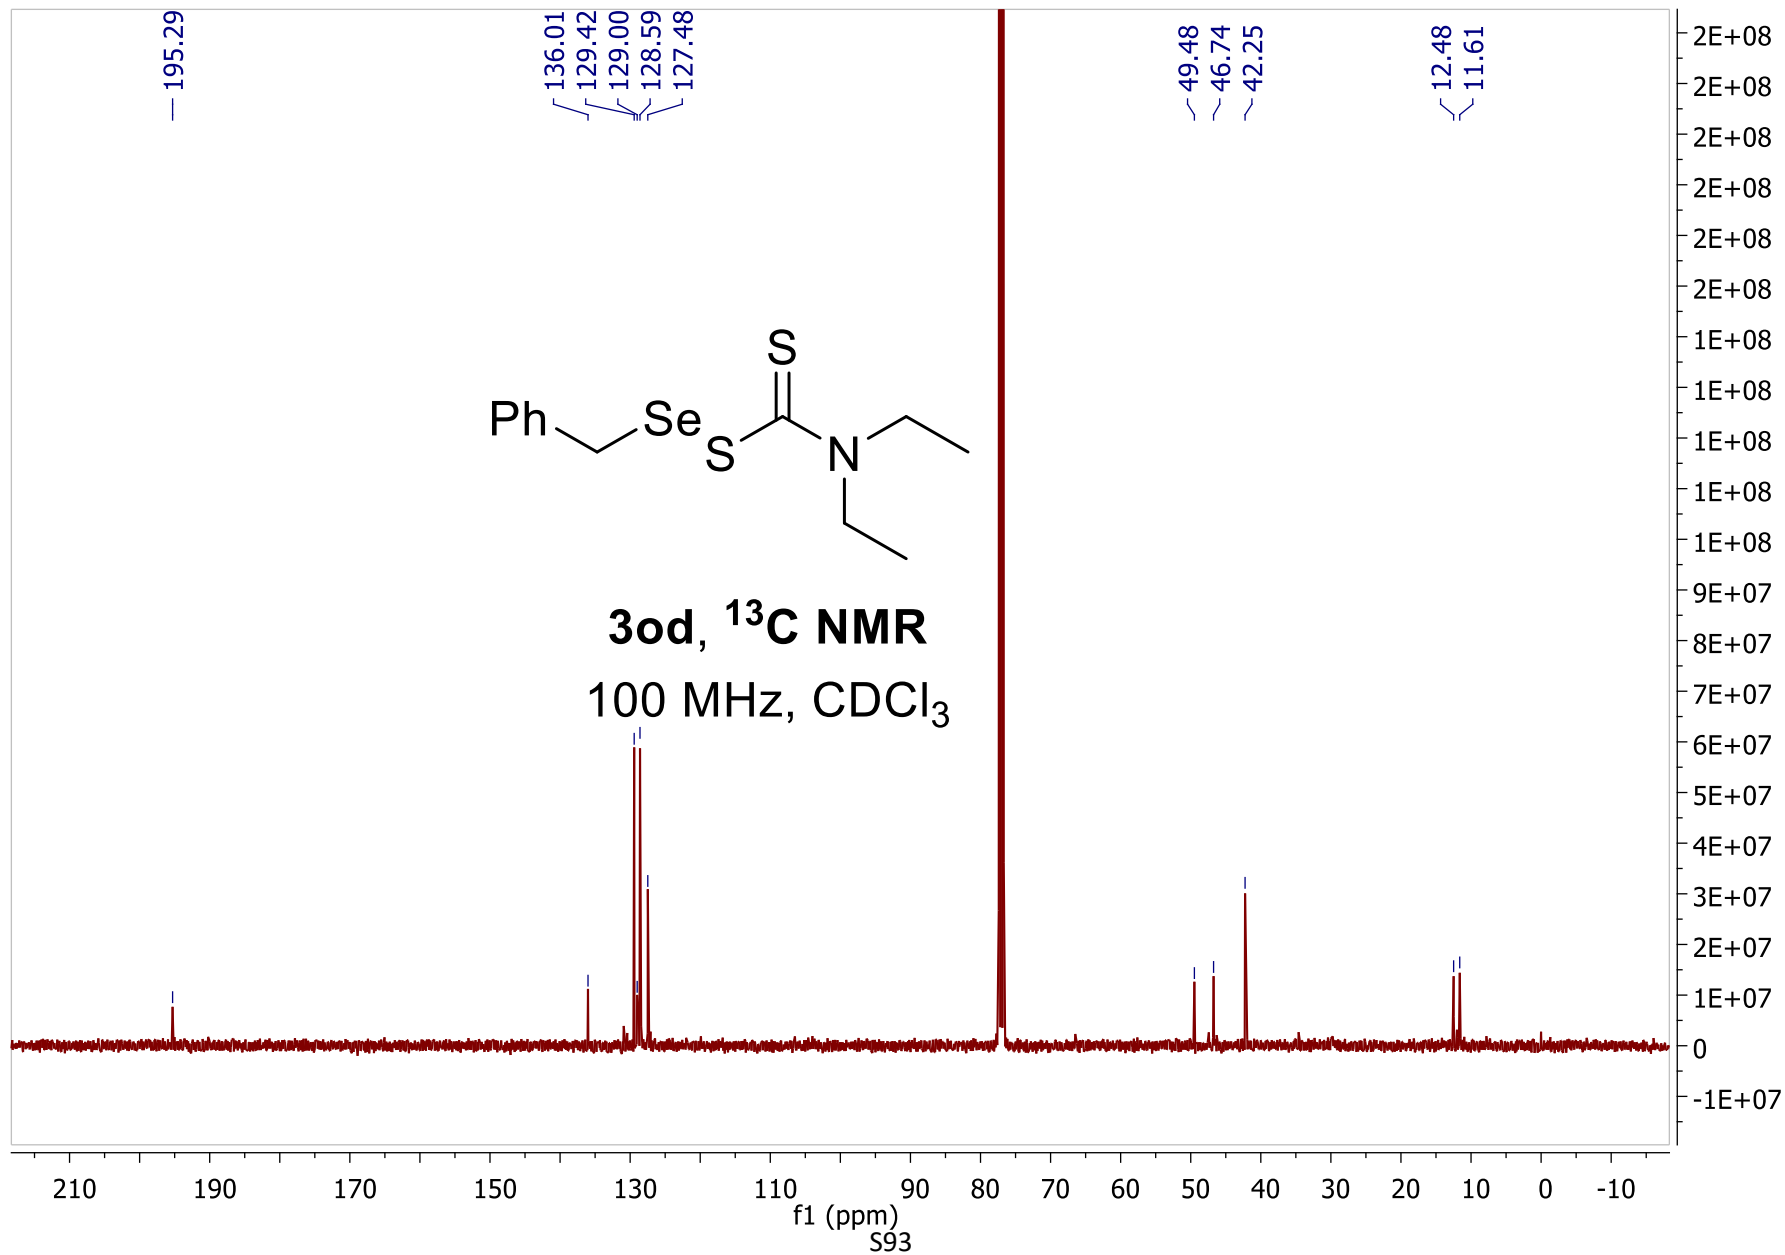

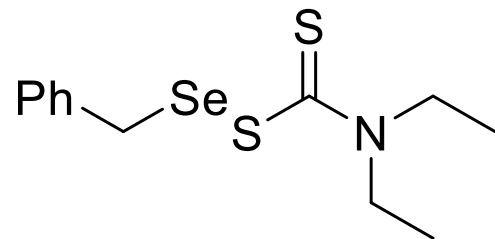

**3od, <sup>77</sup>Se NMR**  
76 MHz, CDCl<sub>3</sub>

— 330.47

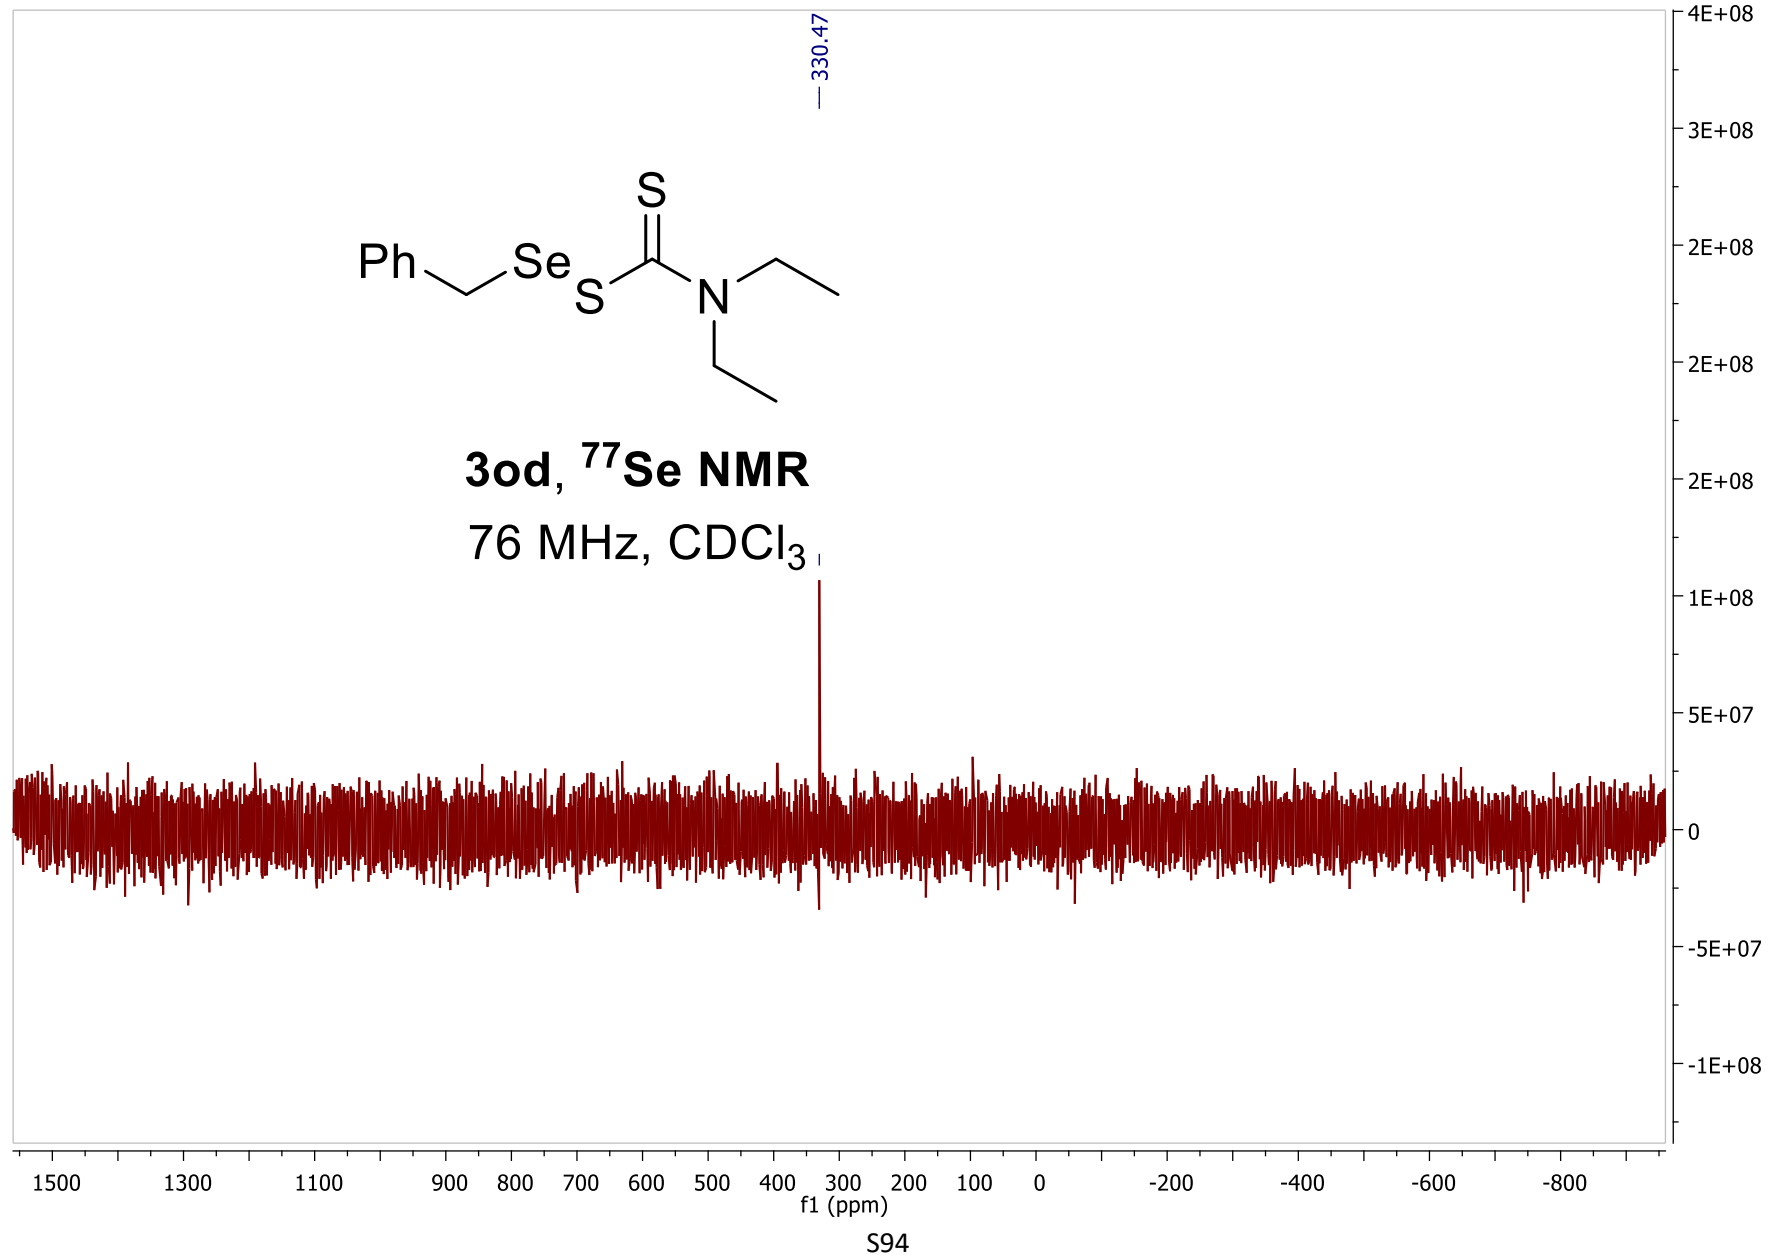

# Spectrum Plot Report

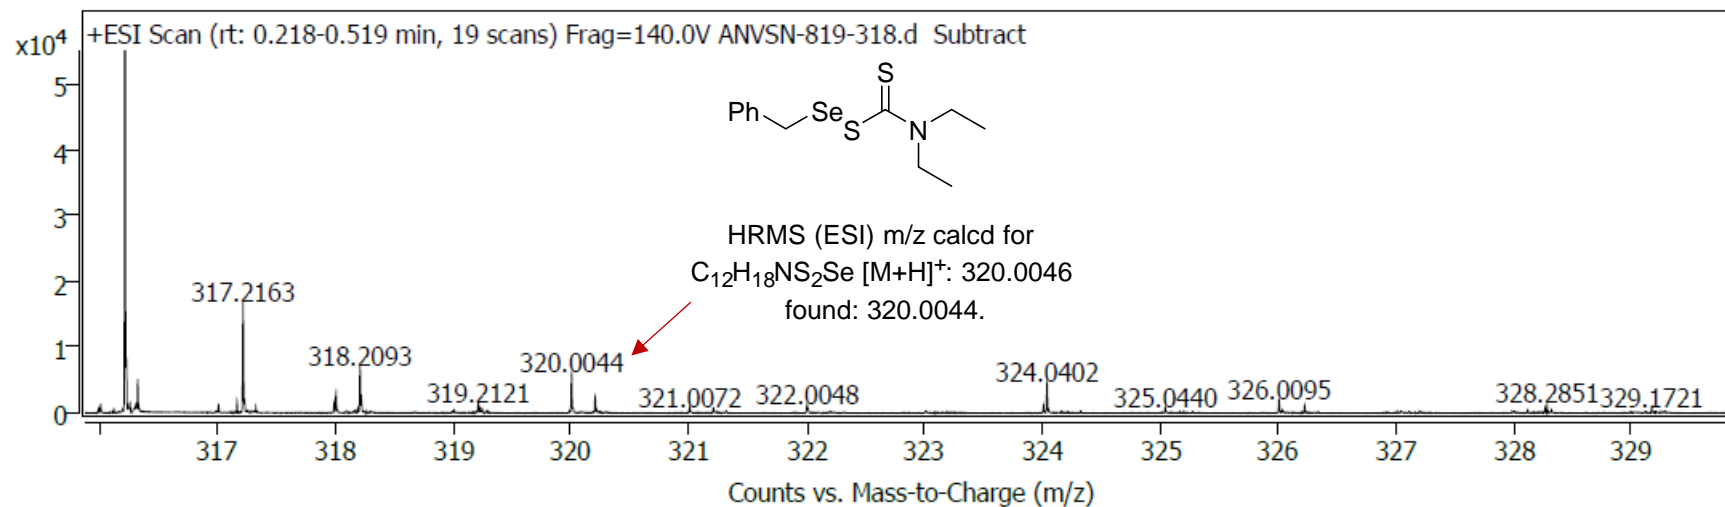

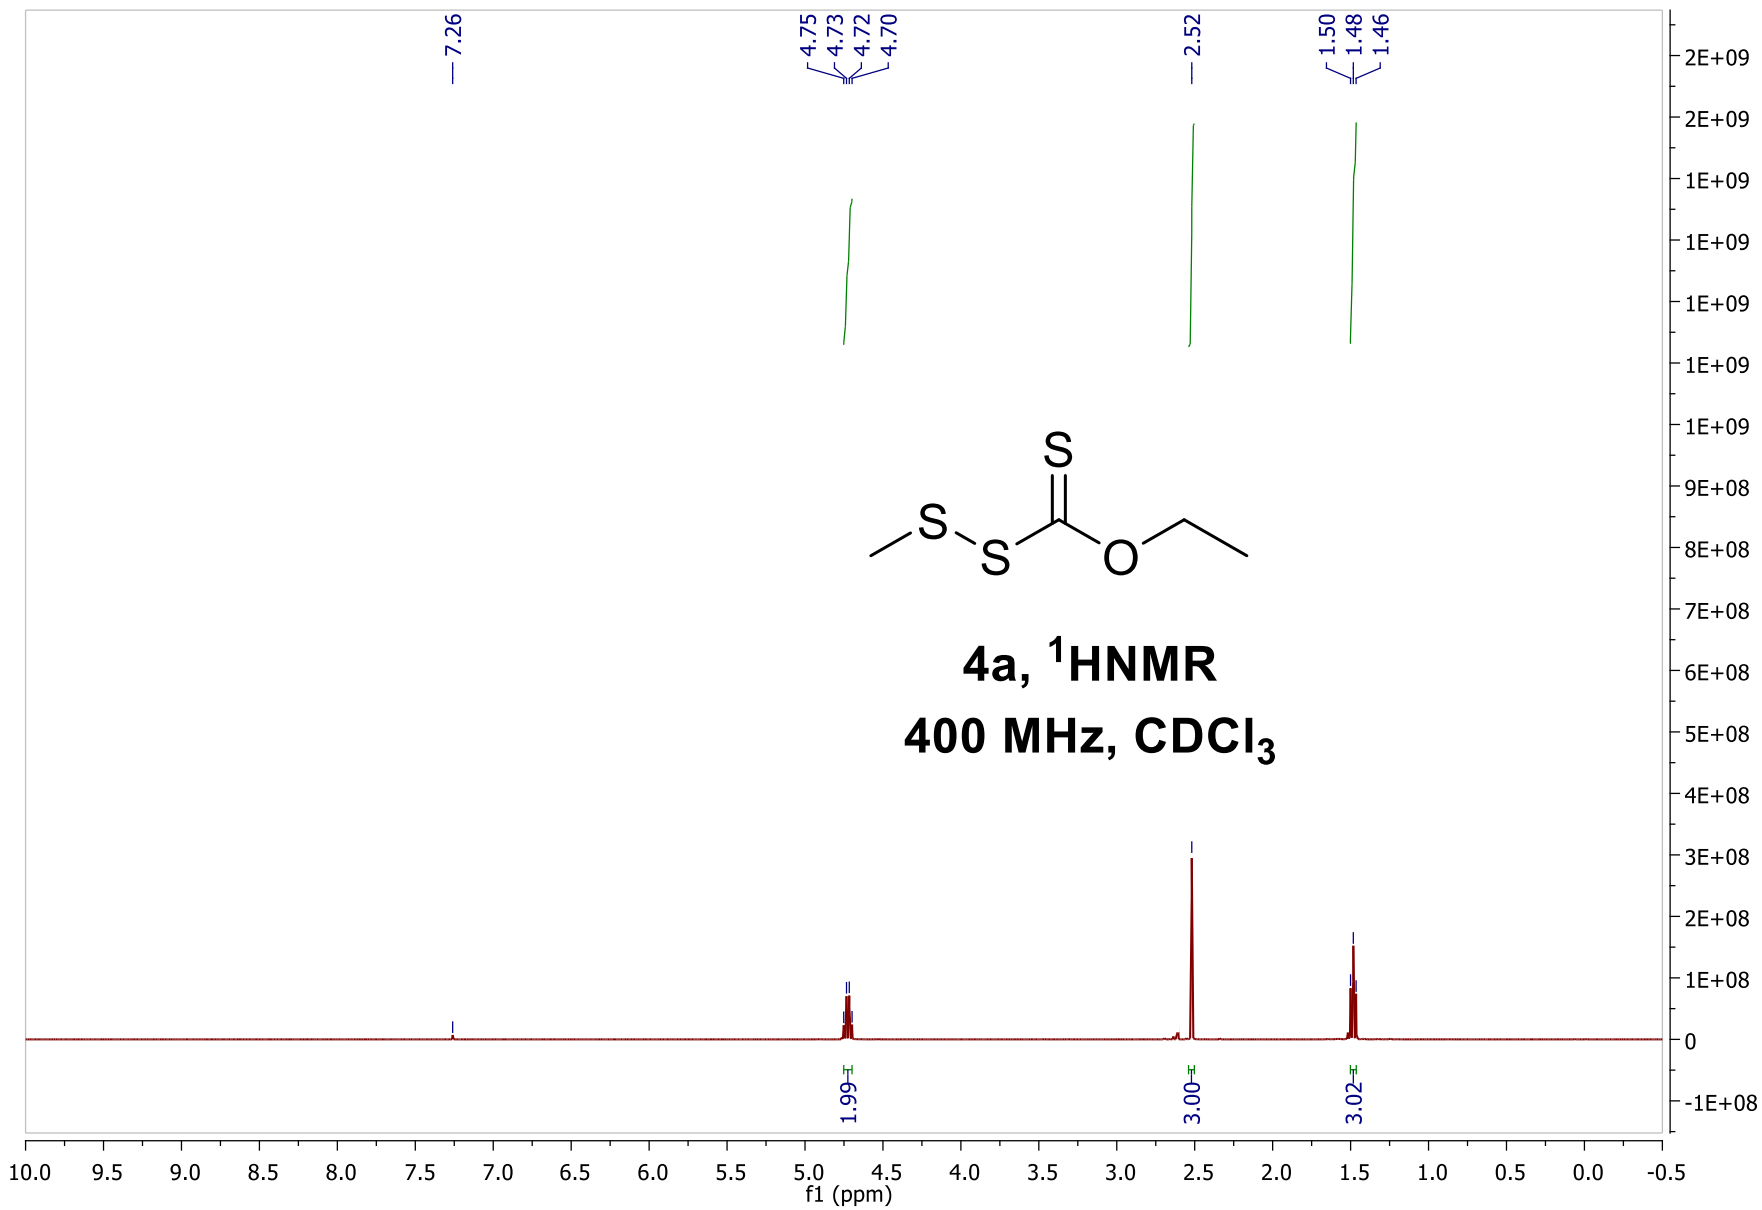



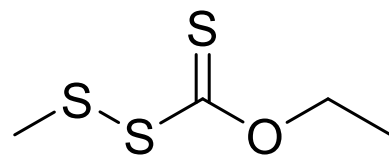

**4a,  $^{13}\text{C}$  NMR**  
**100 MHz,  $\text{CDCl}_3$**

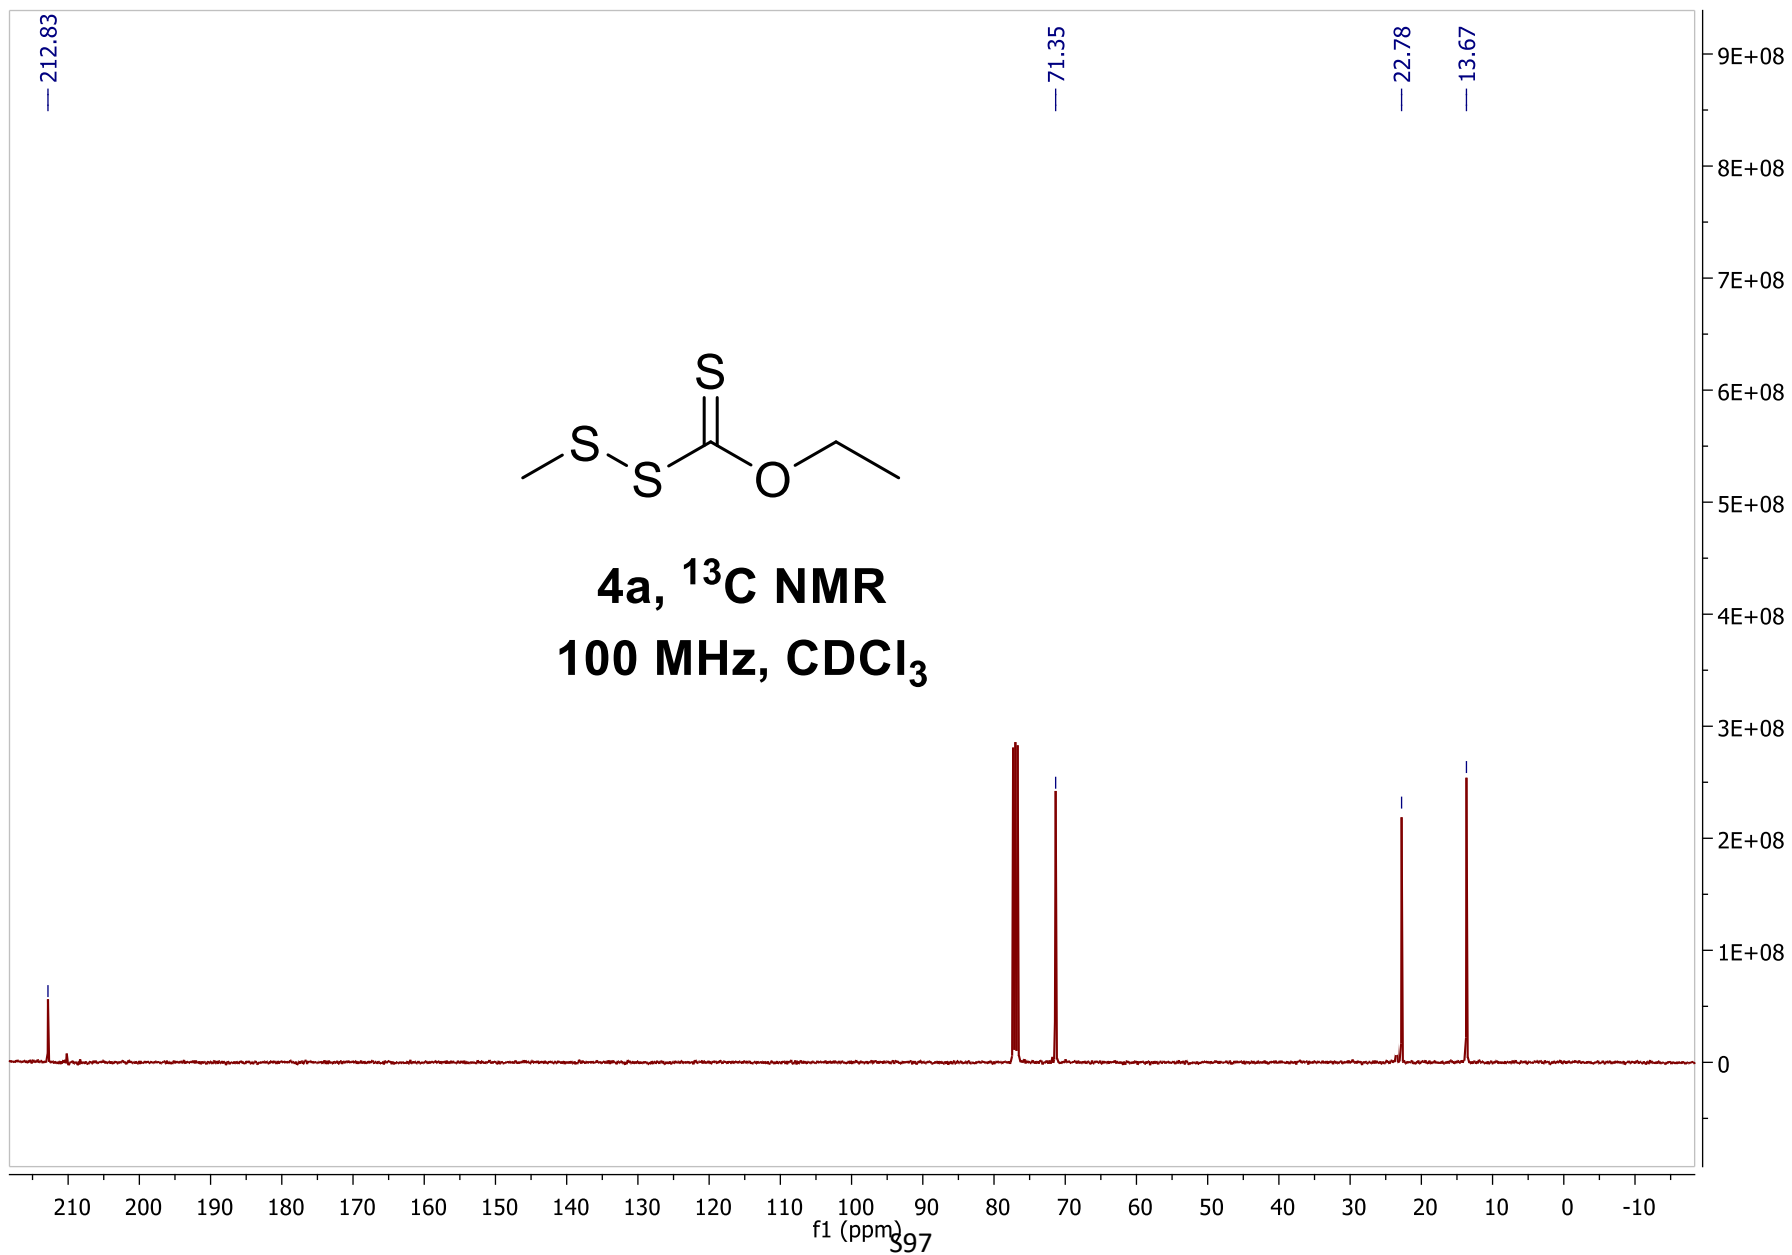

# Spectrum Plot Report

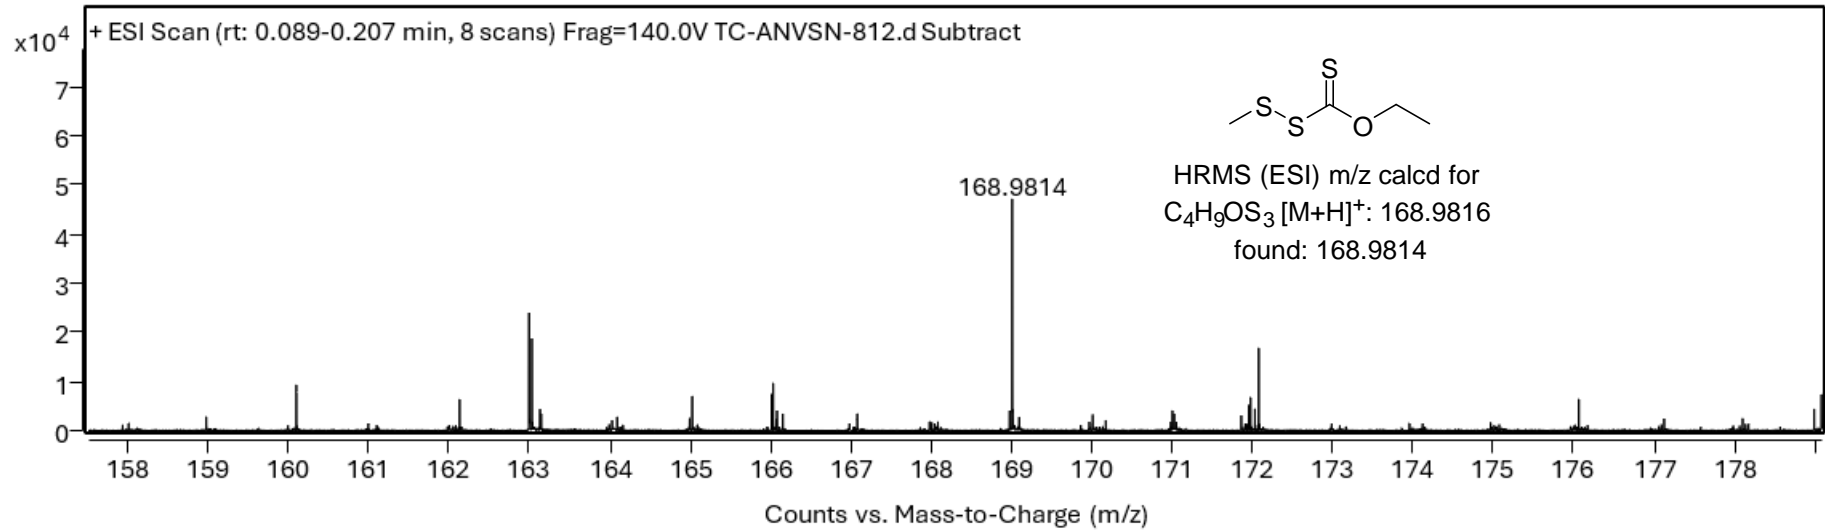

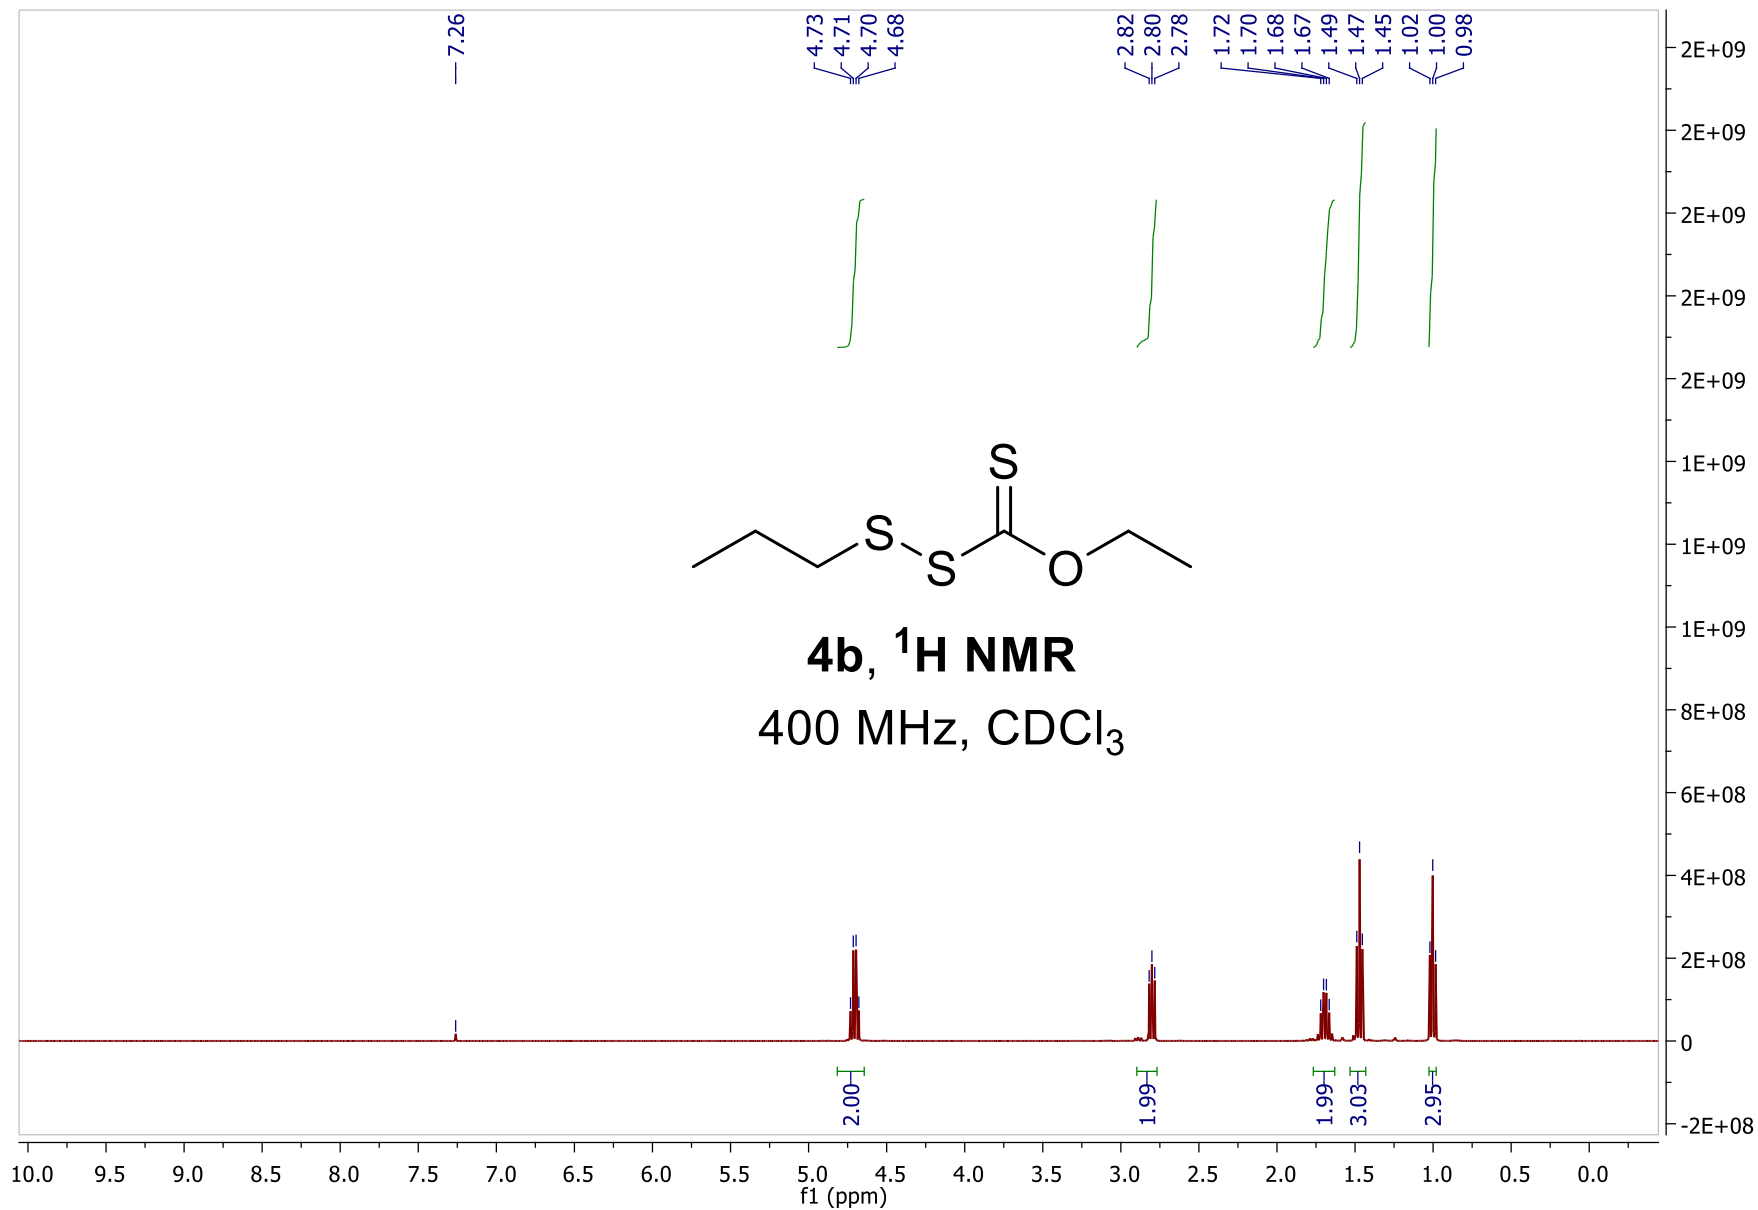

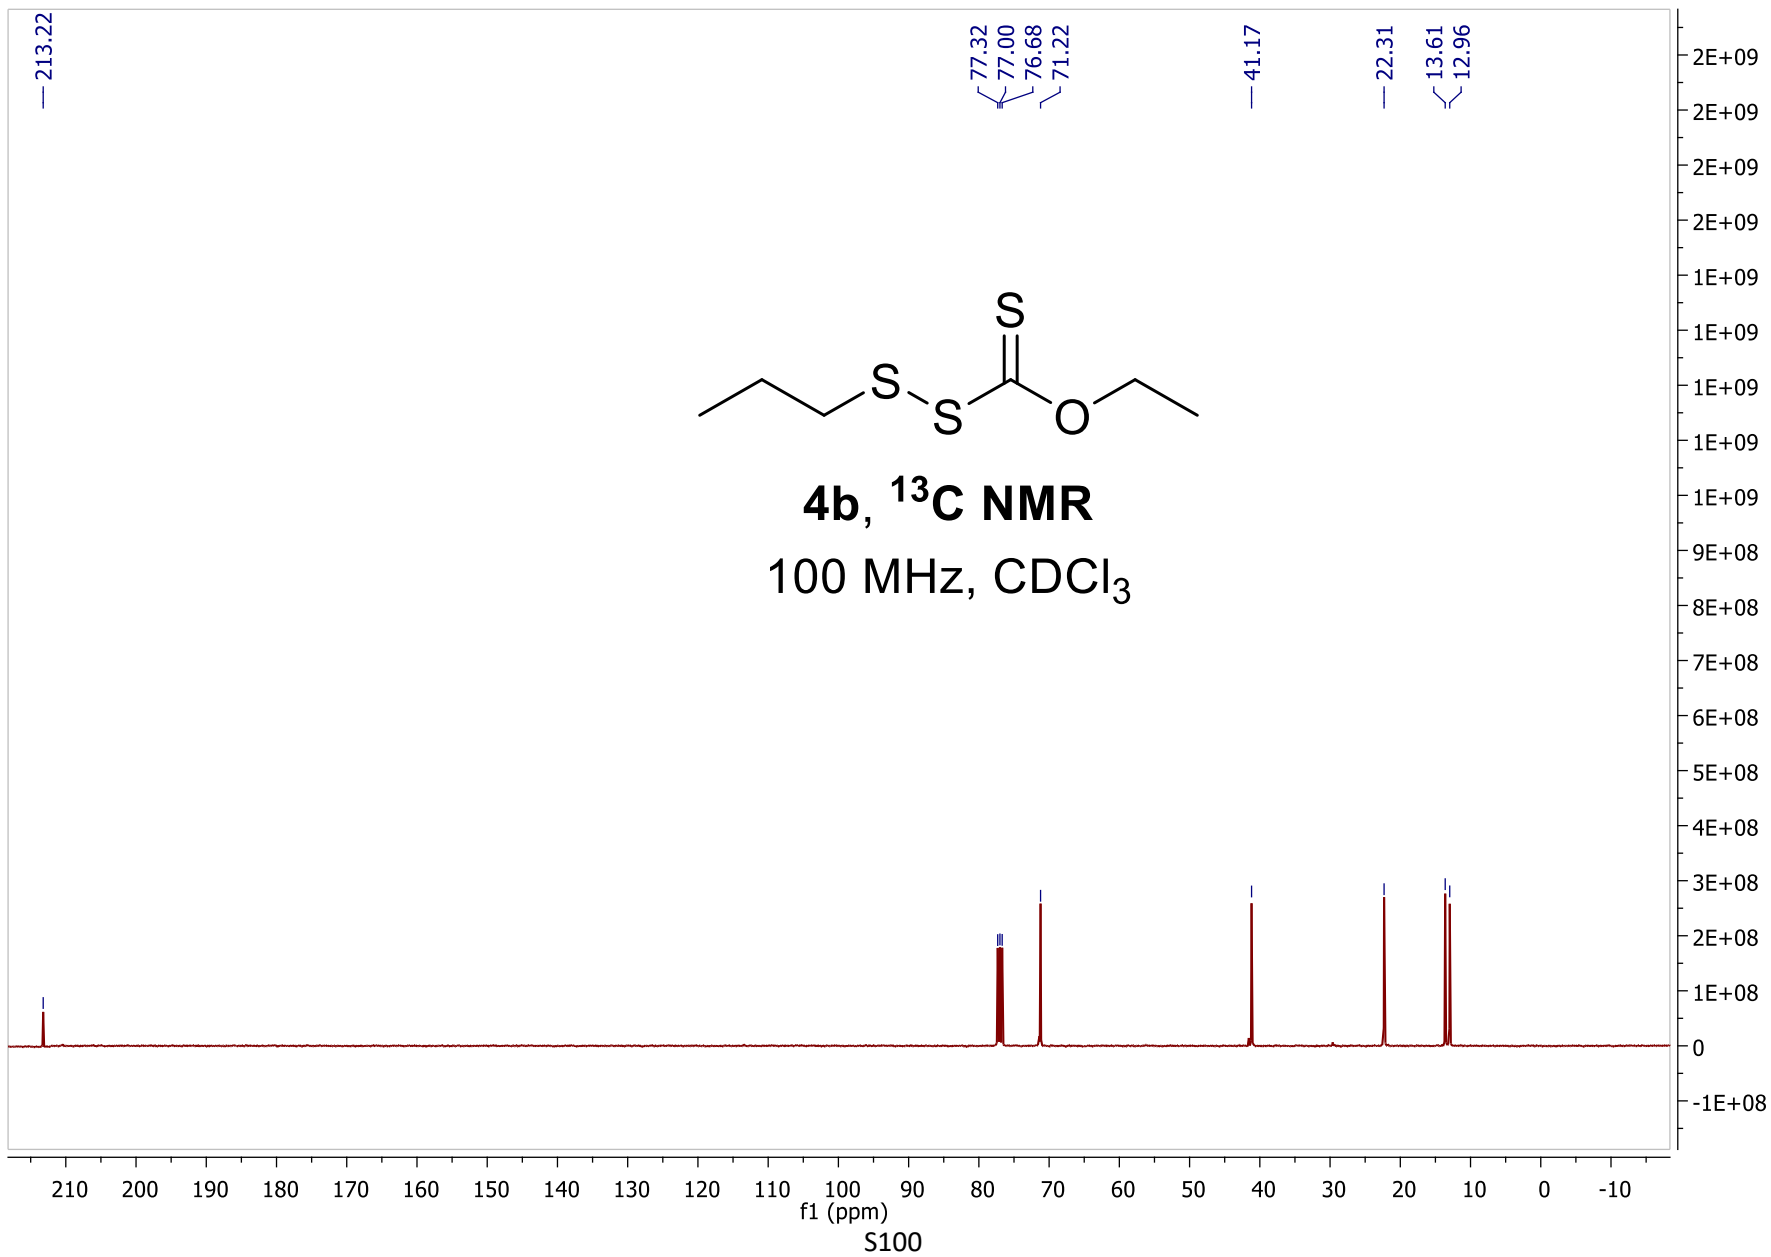

# Spectrum Plot Report

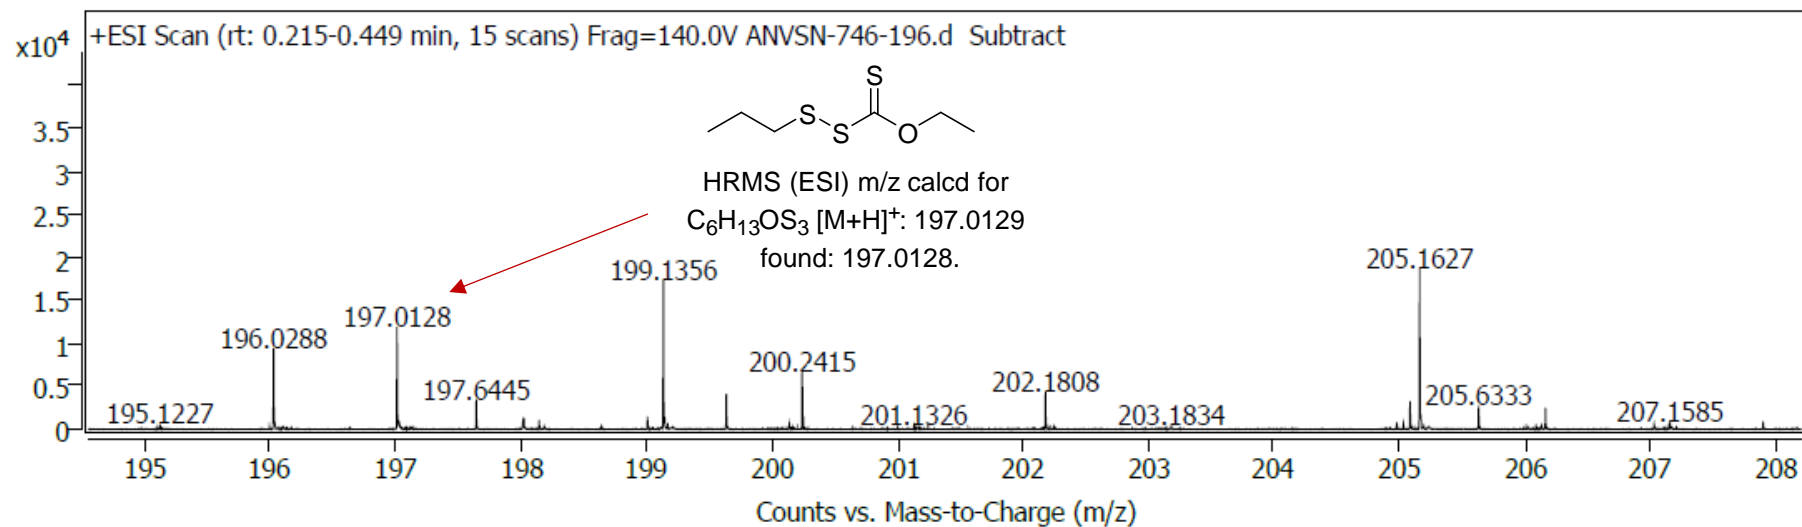

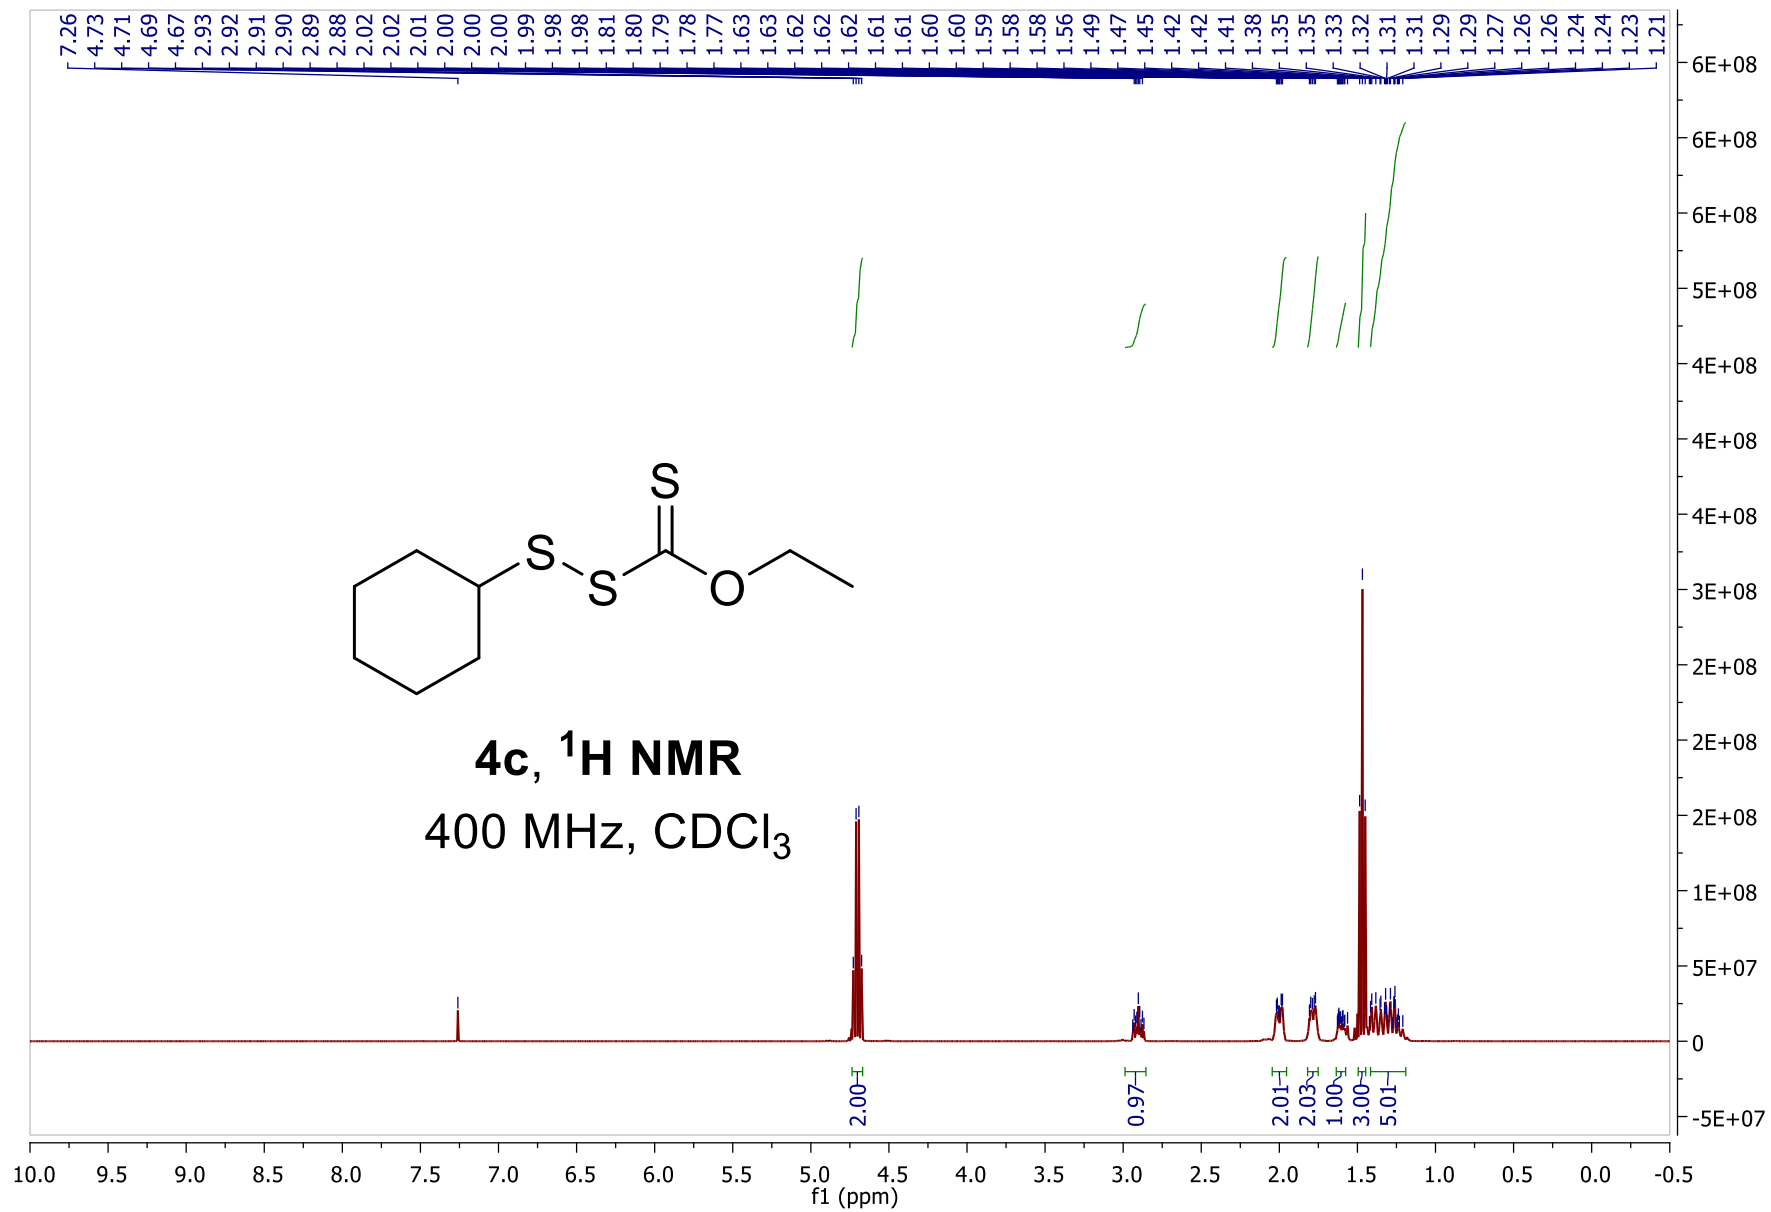

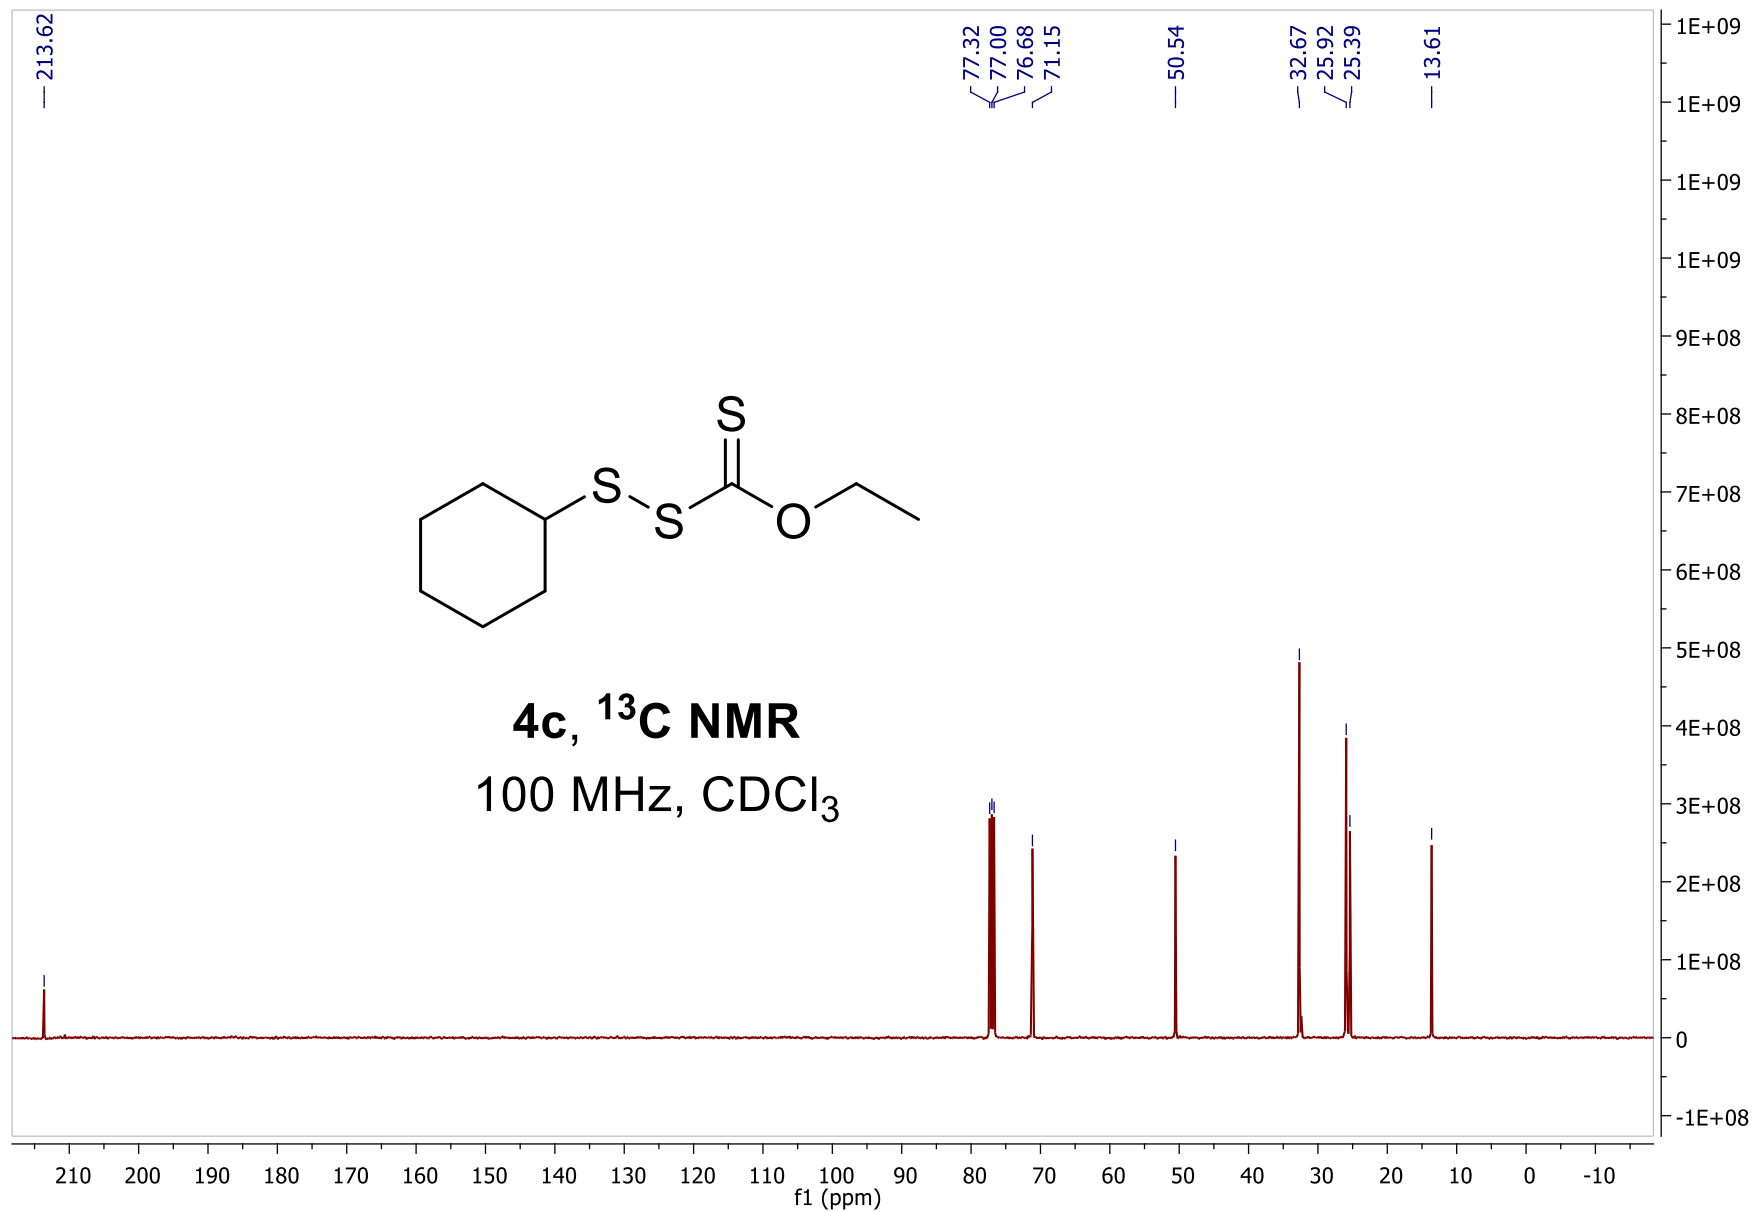

# Spectrum Plot Report

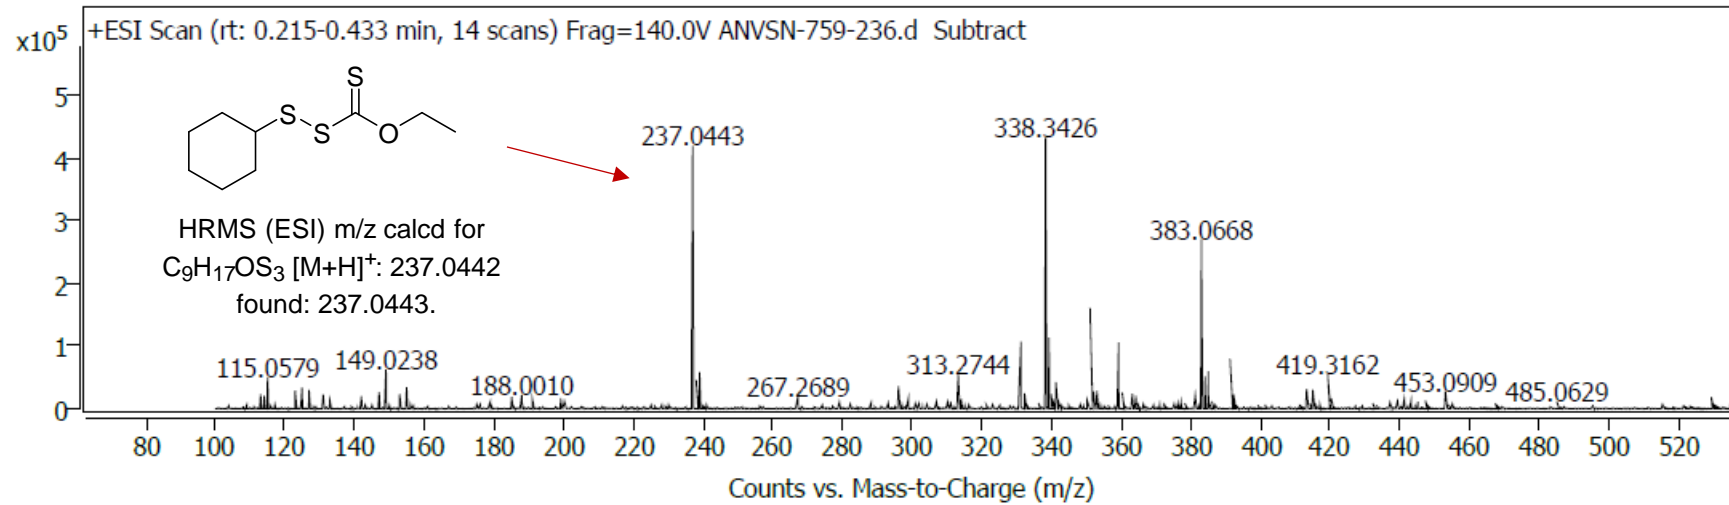



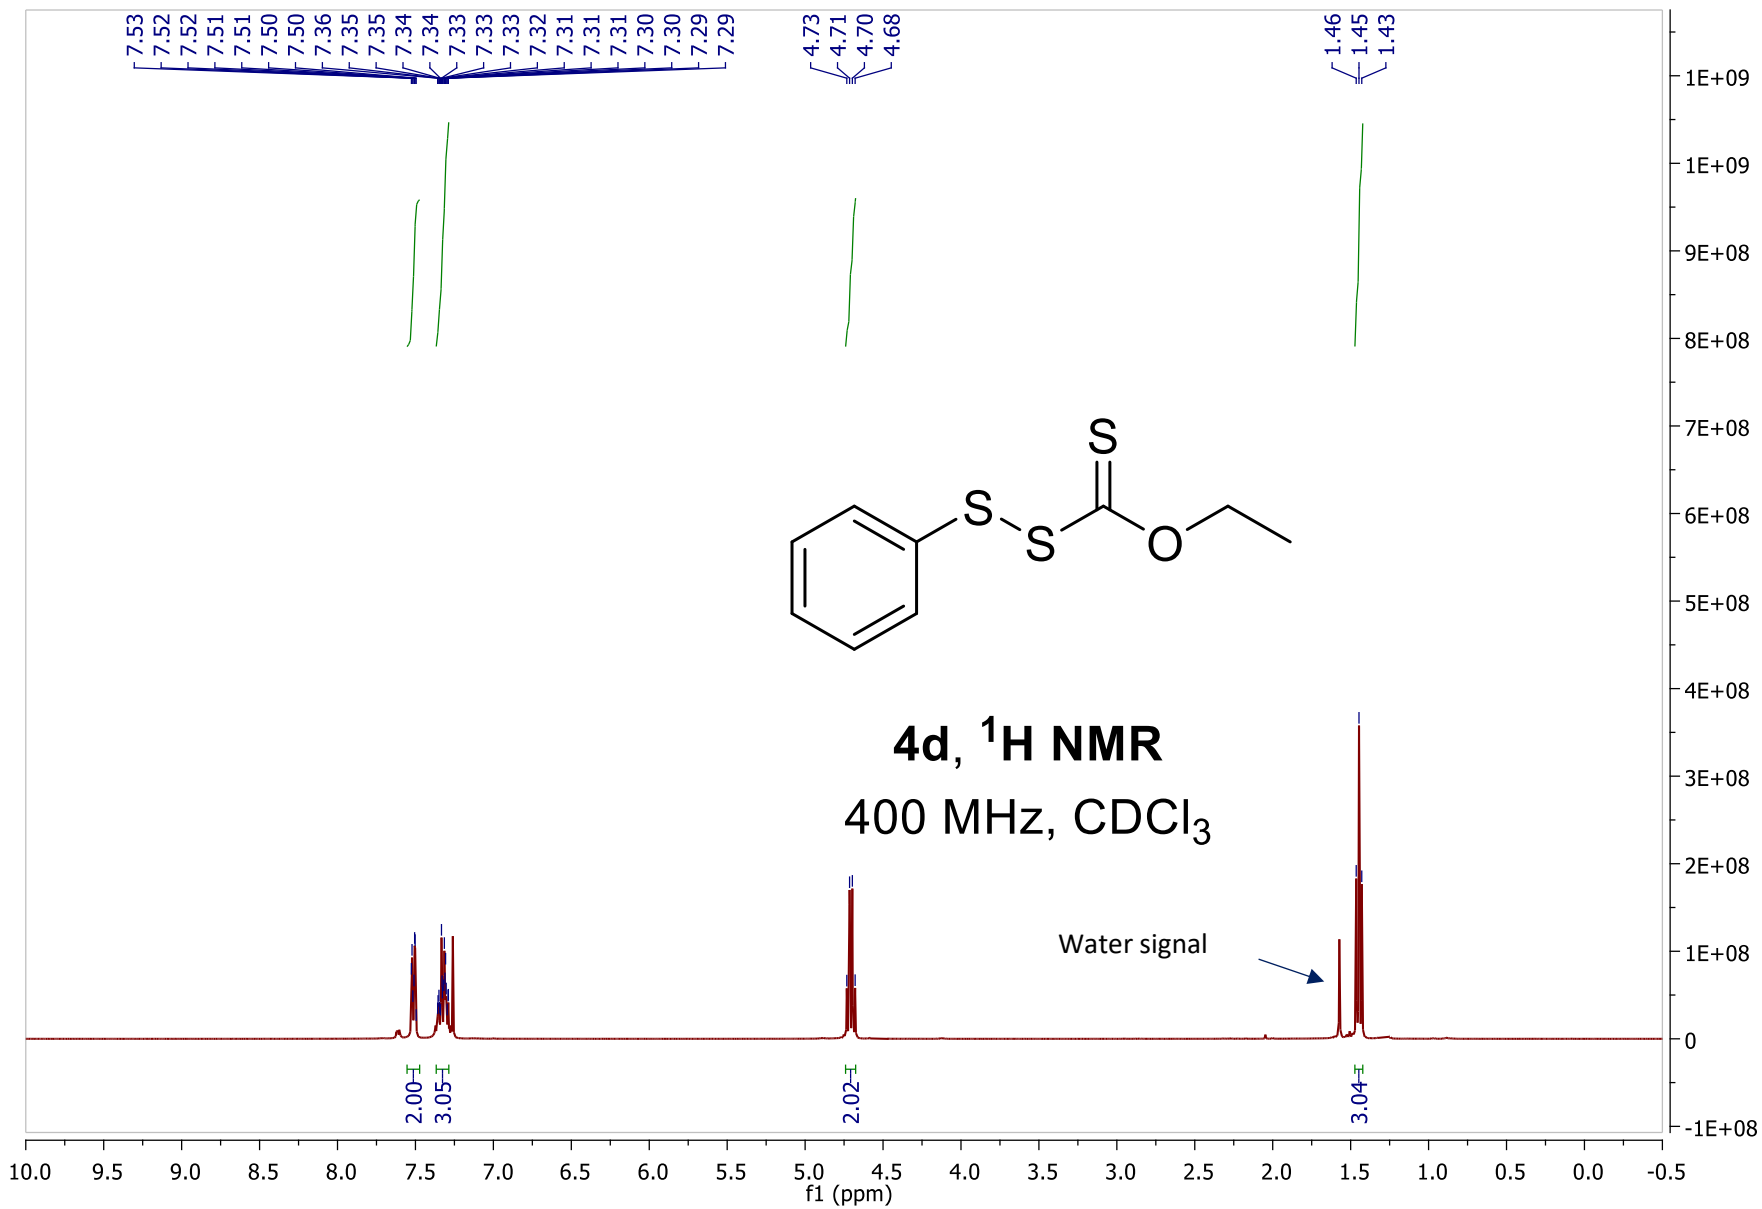

S105

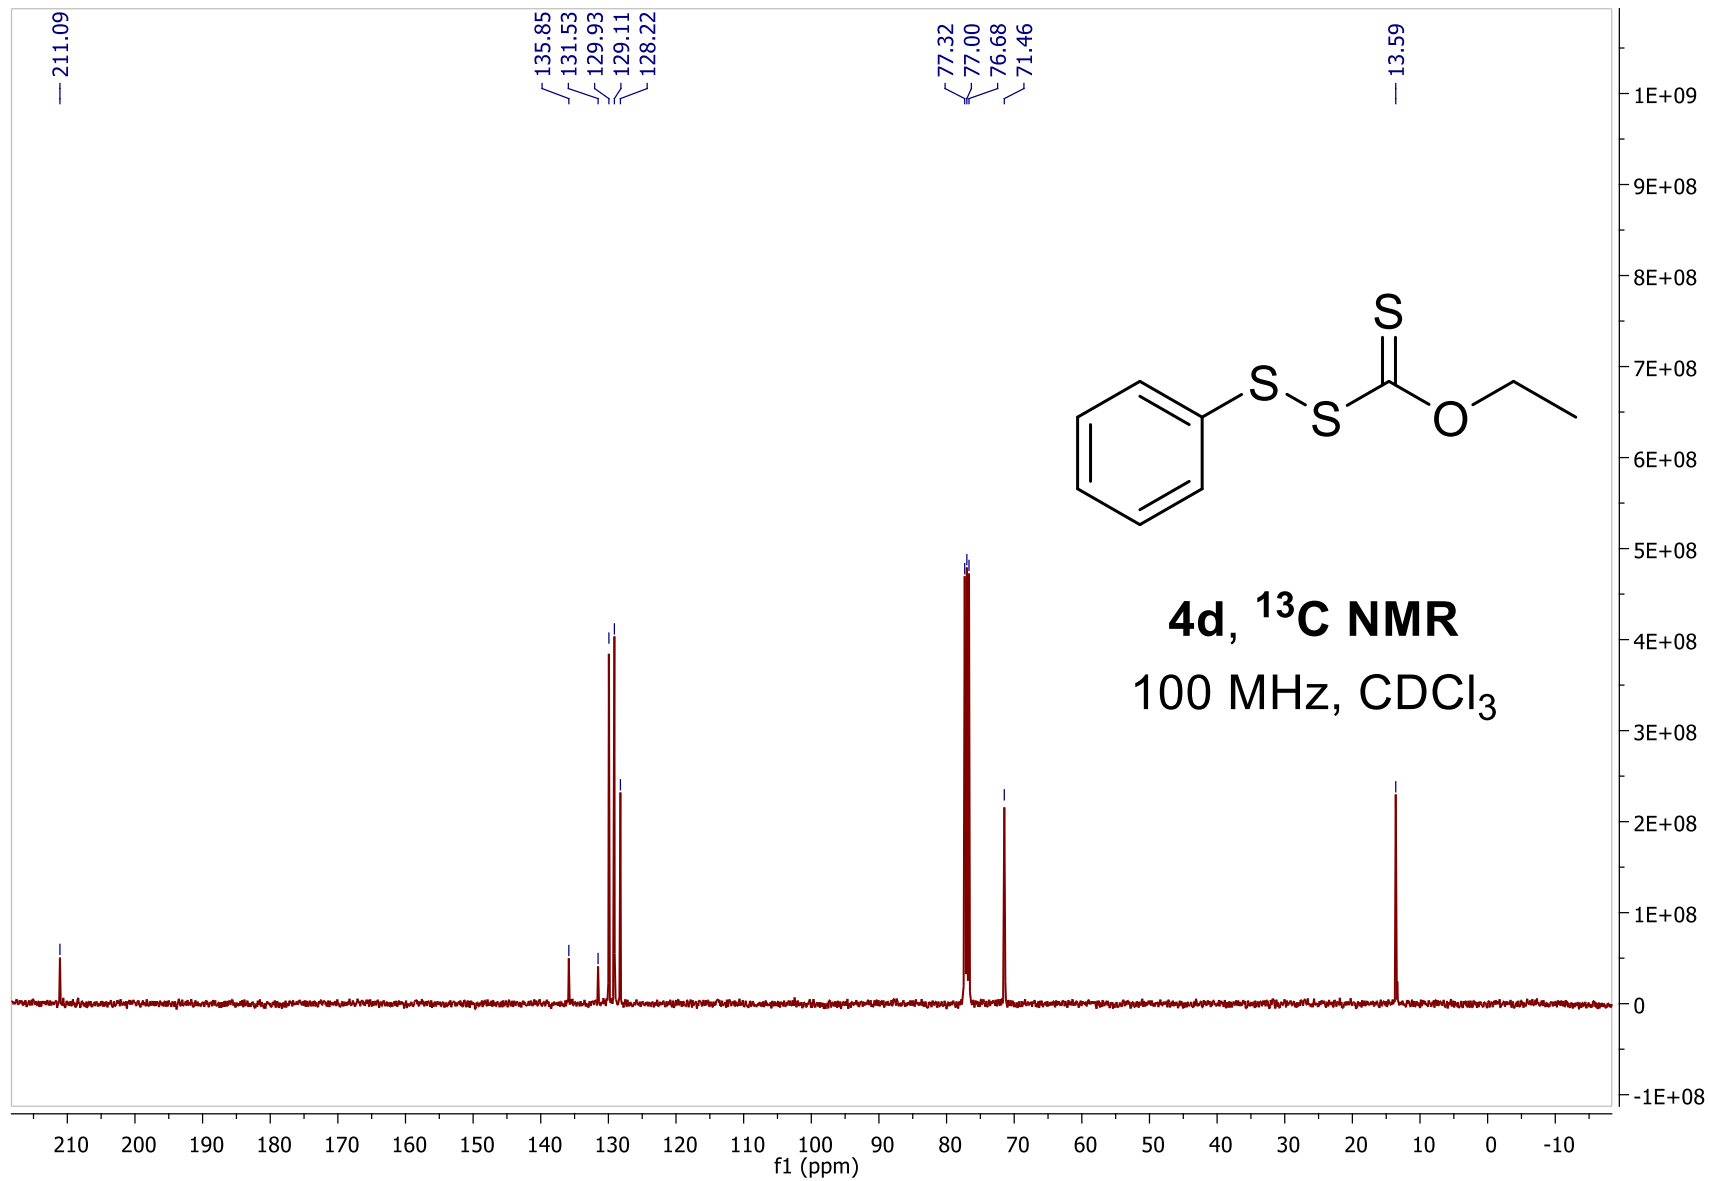

S106

# Spectrum Plot Report

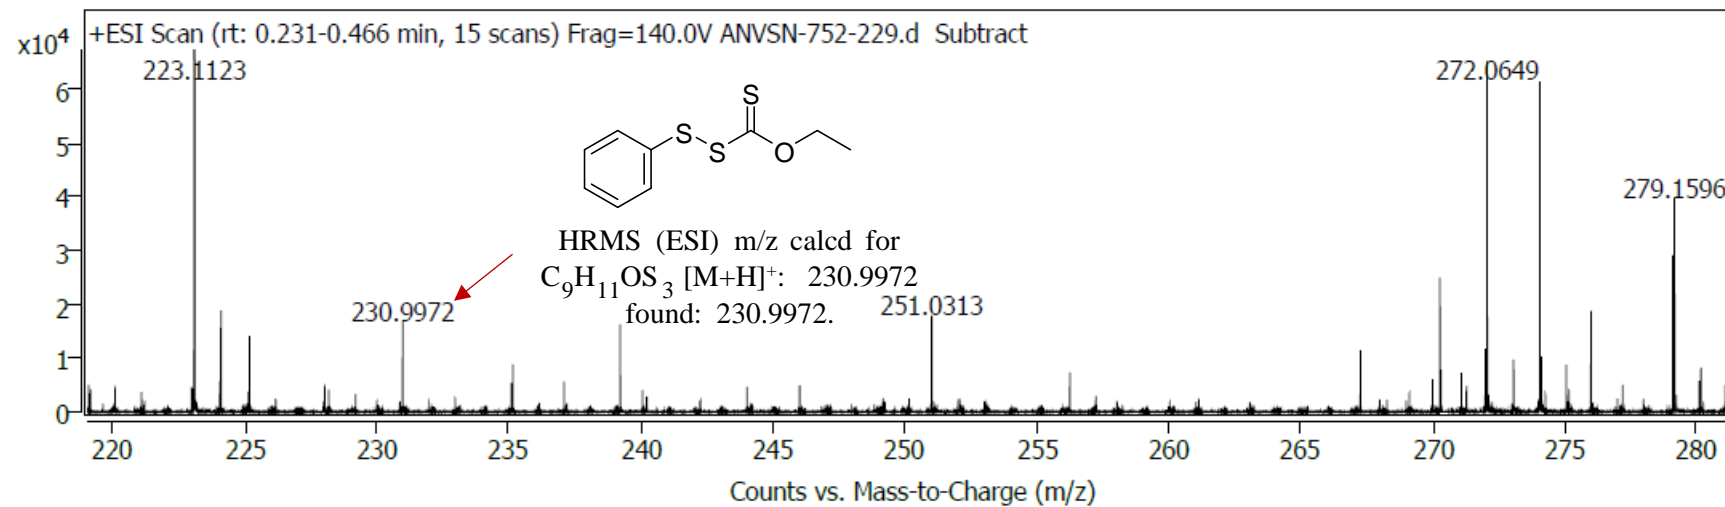

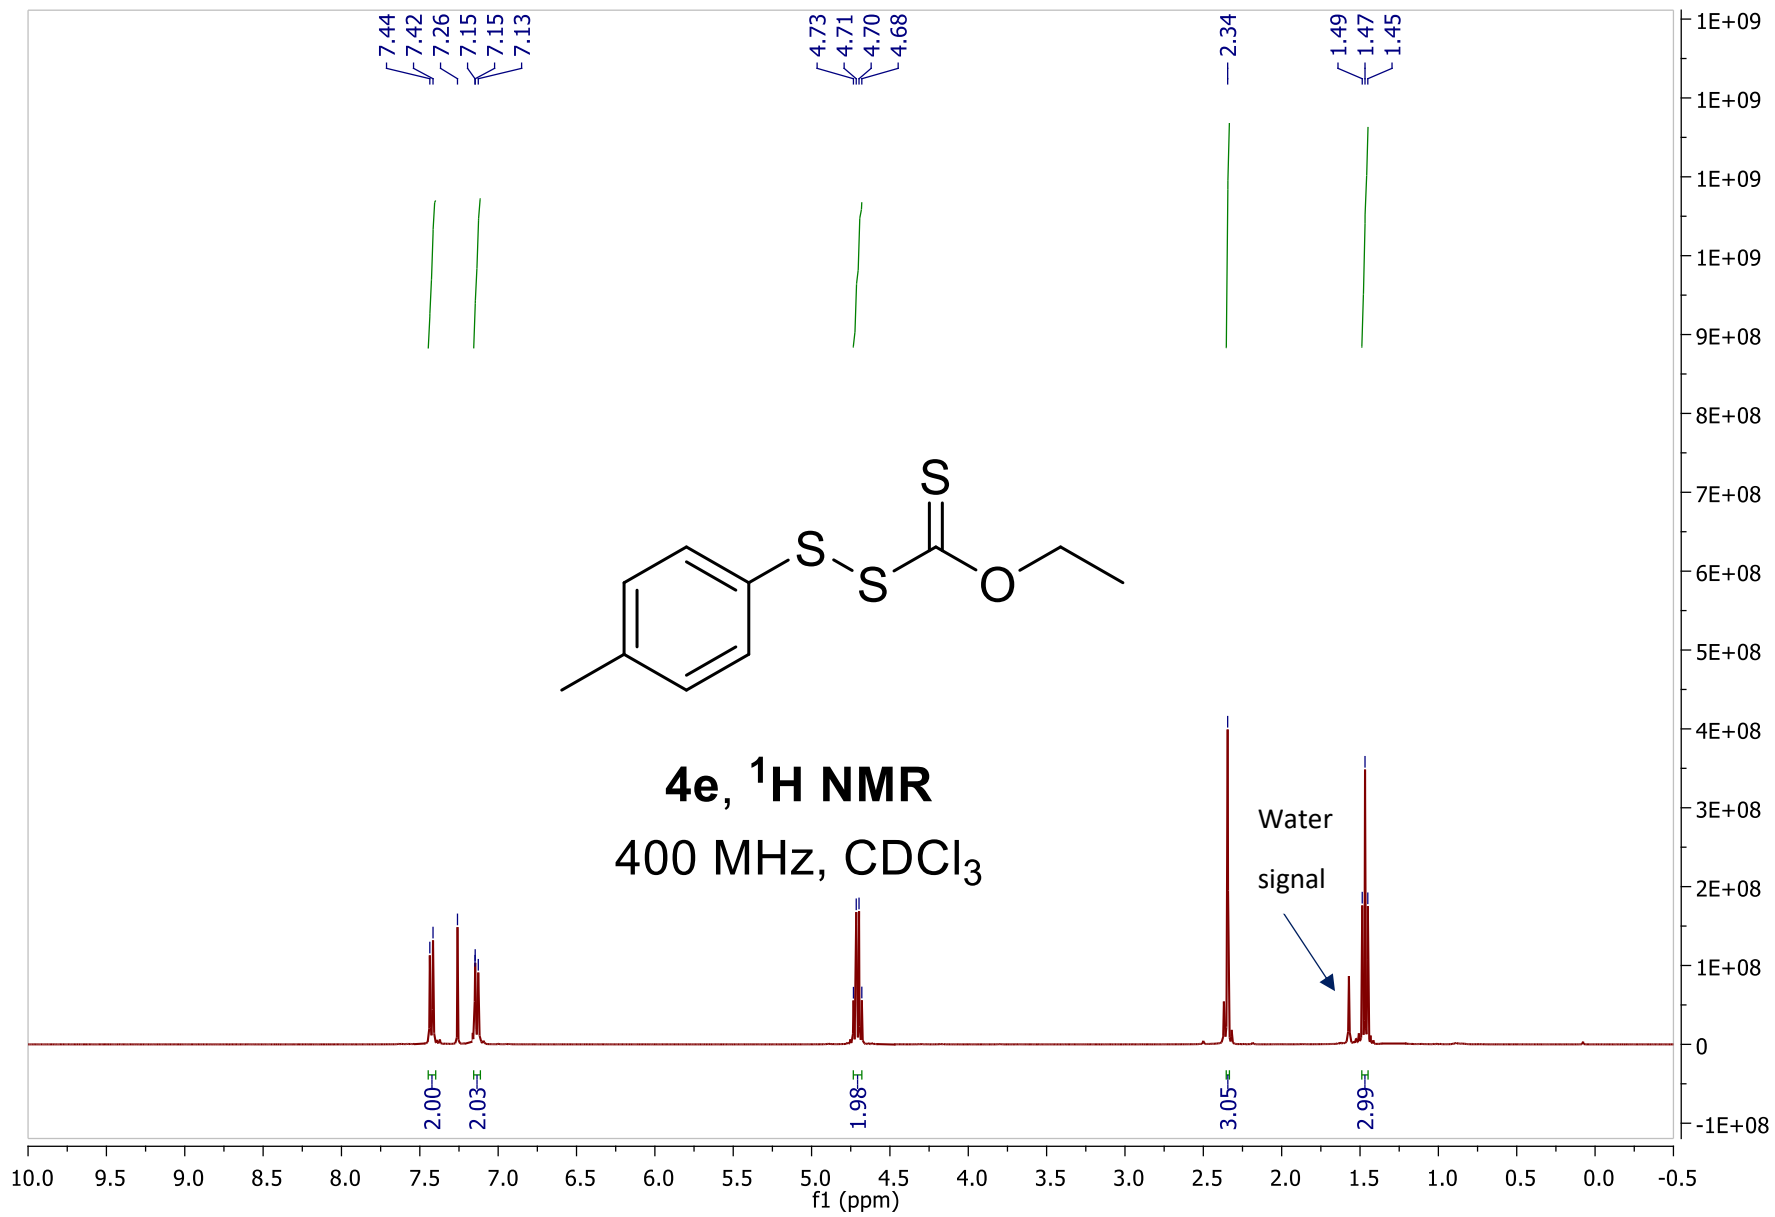

S108

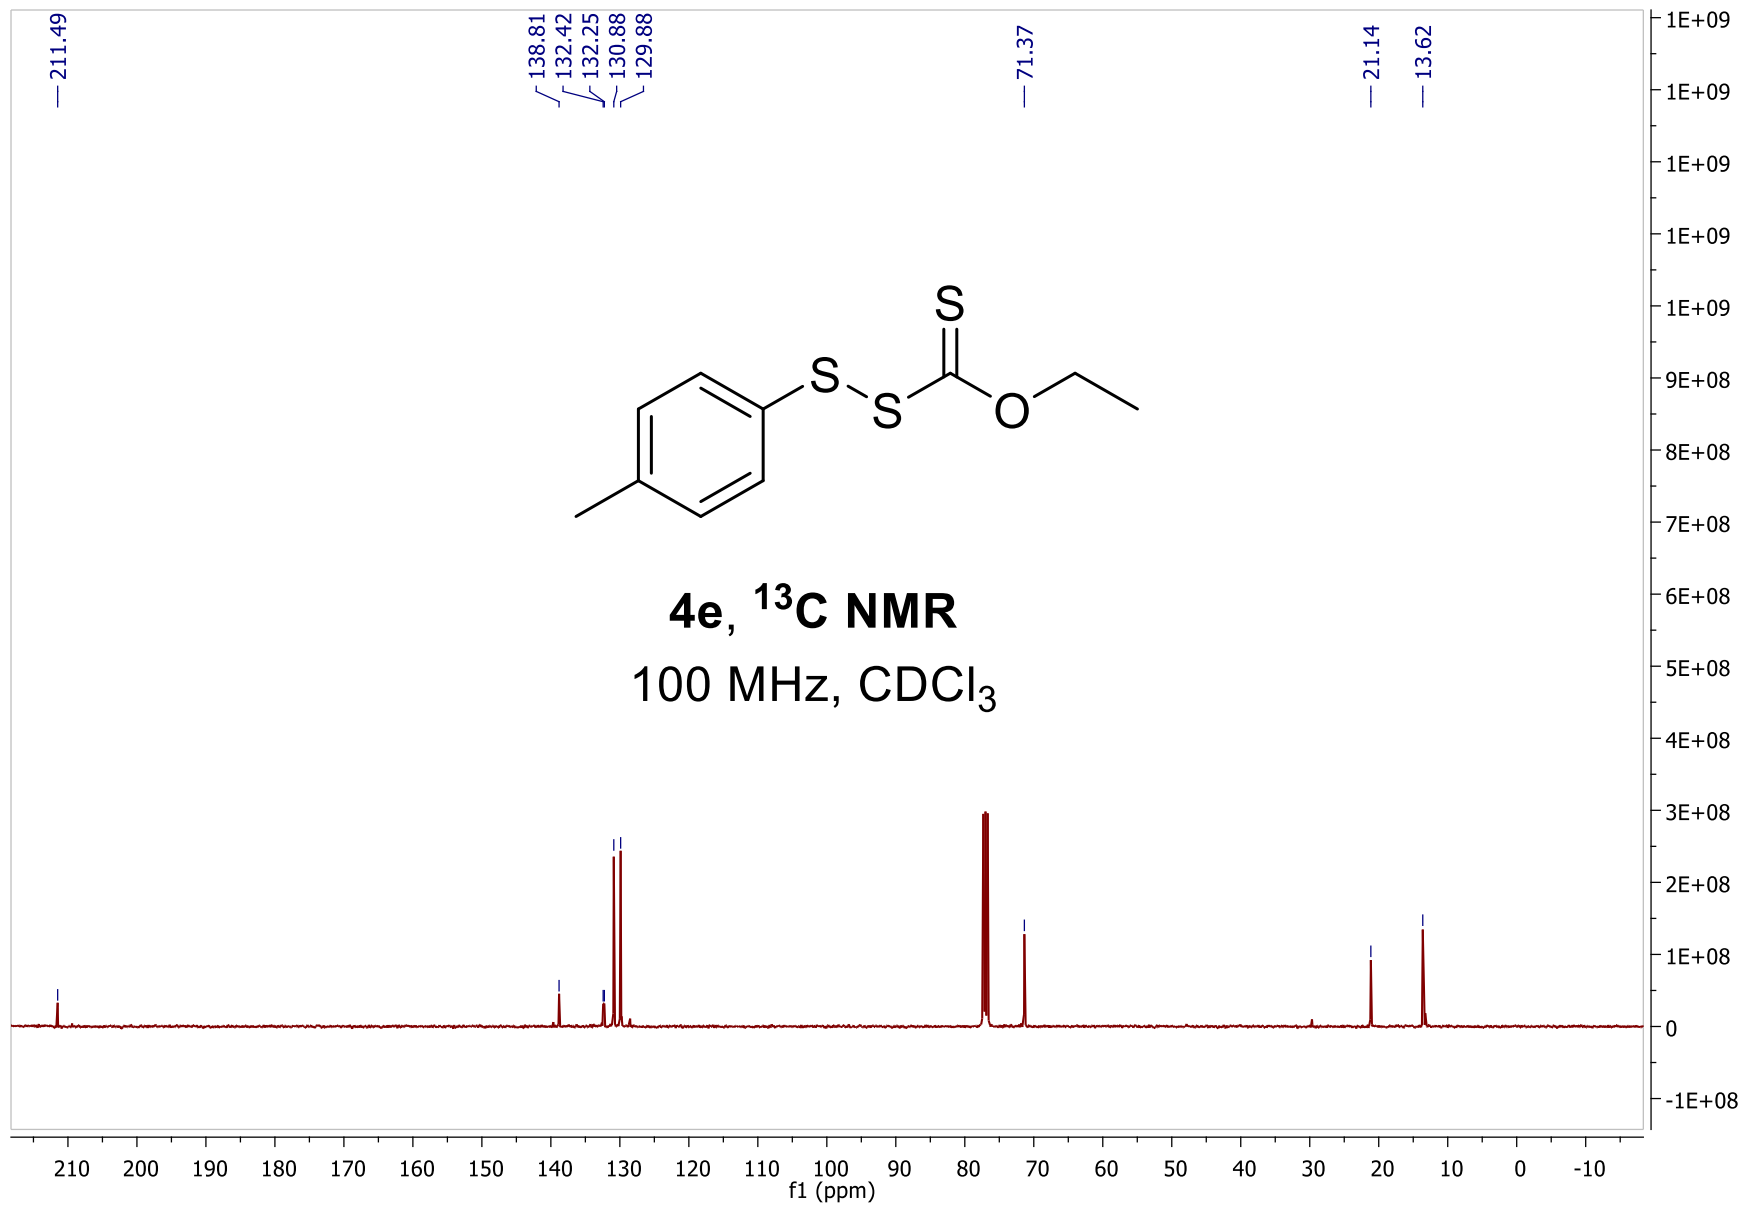

S109

# Spectrum Plot Report

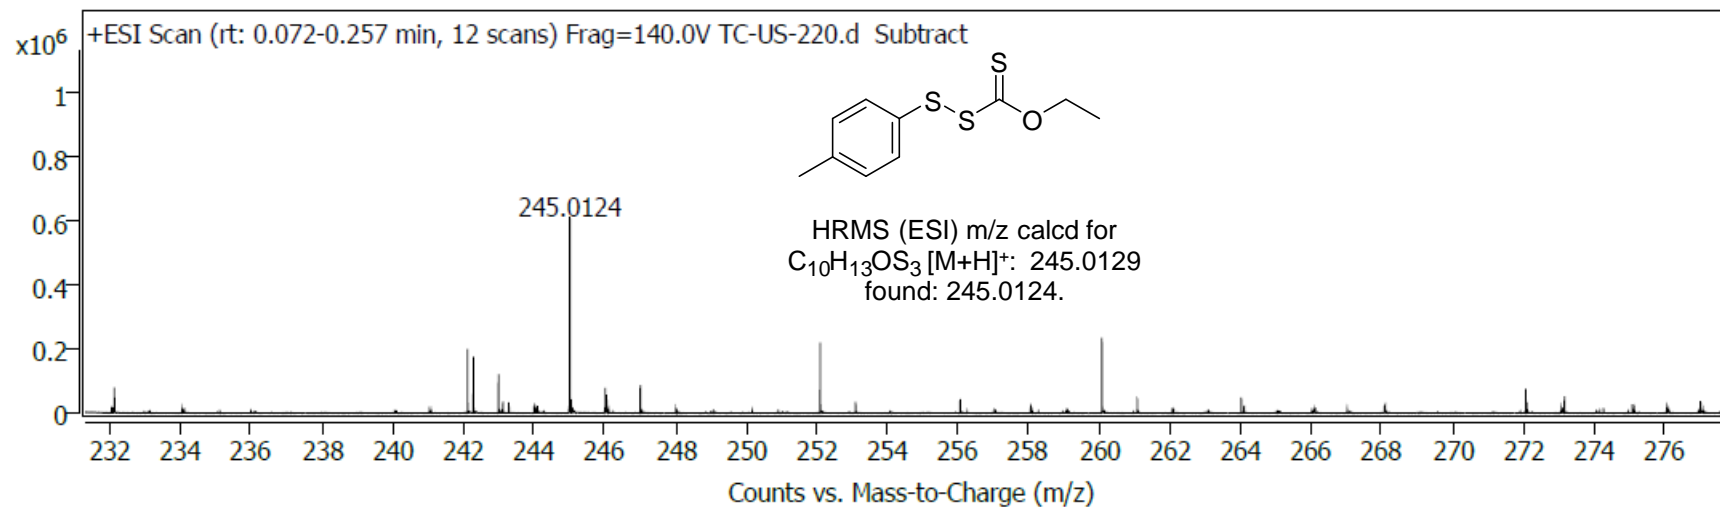

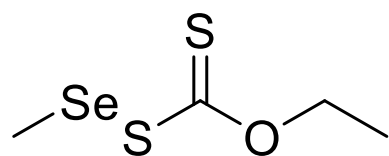

**4f,  $^1\text{H}$  NMR**  
400 MHz,  $\text{CDCl}_3$

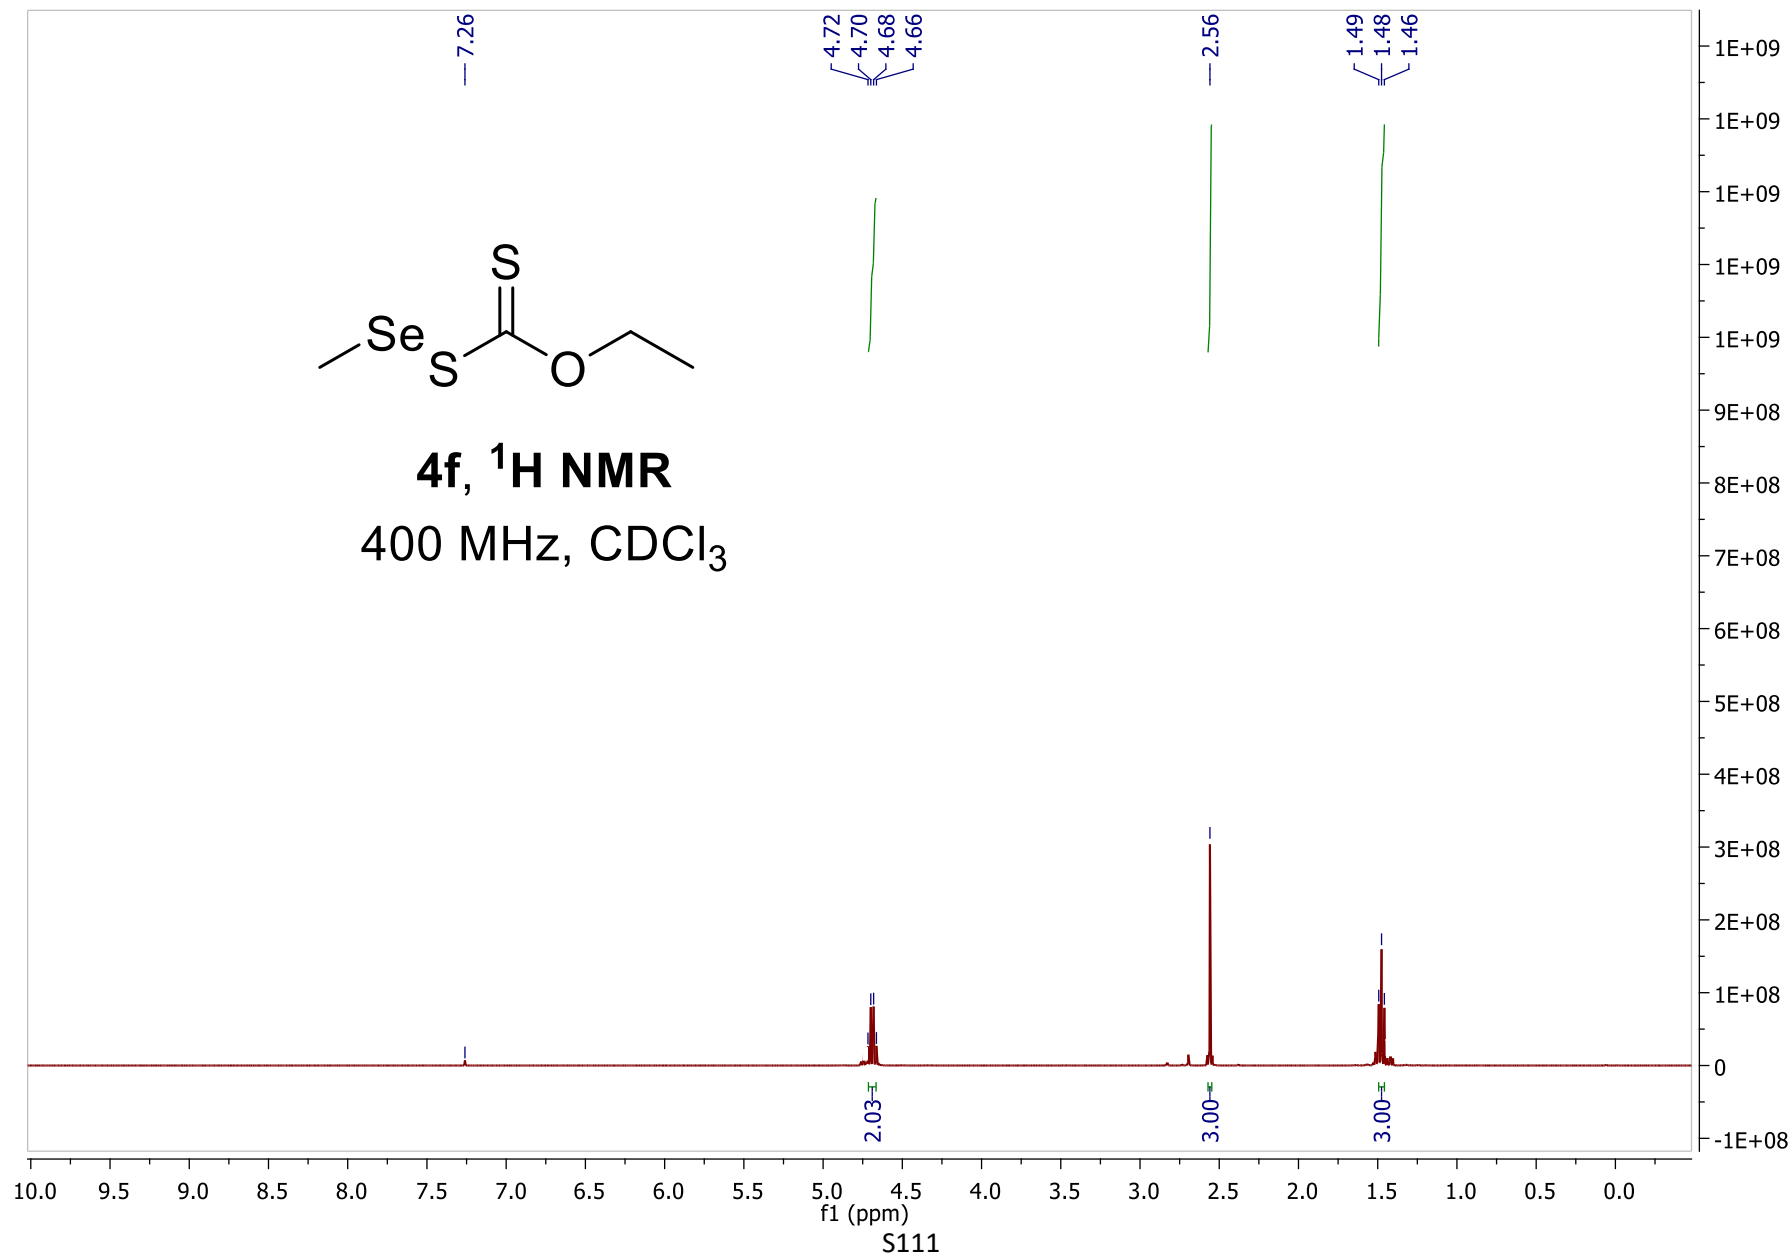

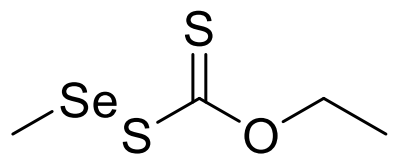

4f,  $^{13}\text{C}$  NMR  
100 MHz,  $\text{CDCl}_3$

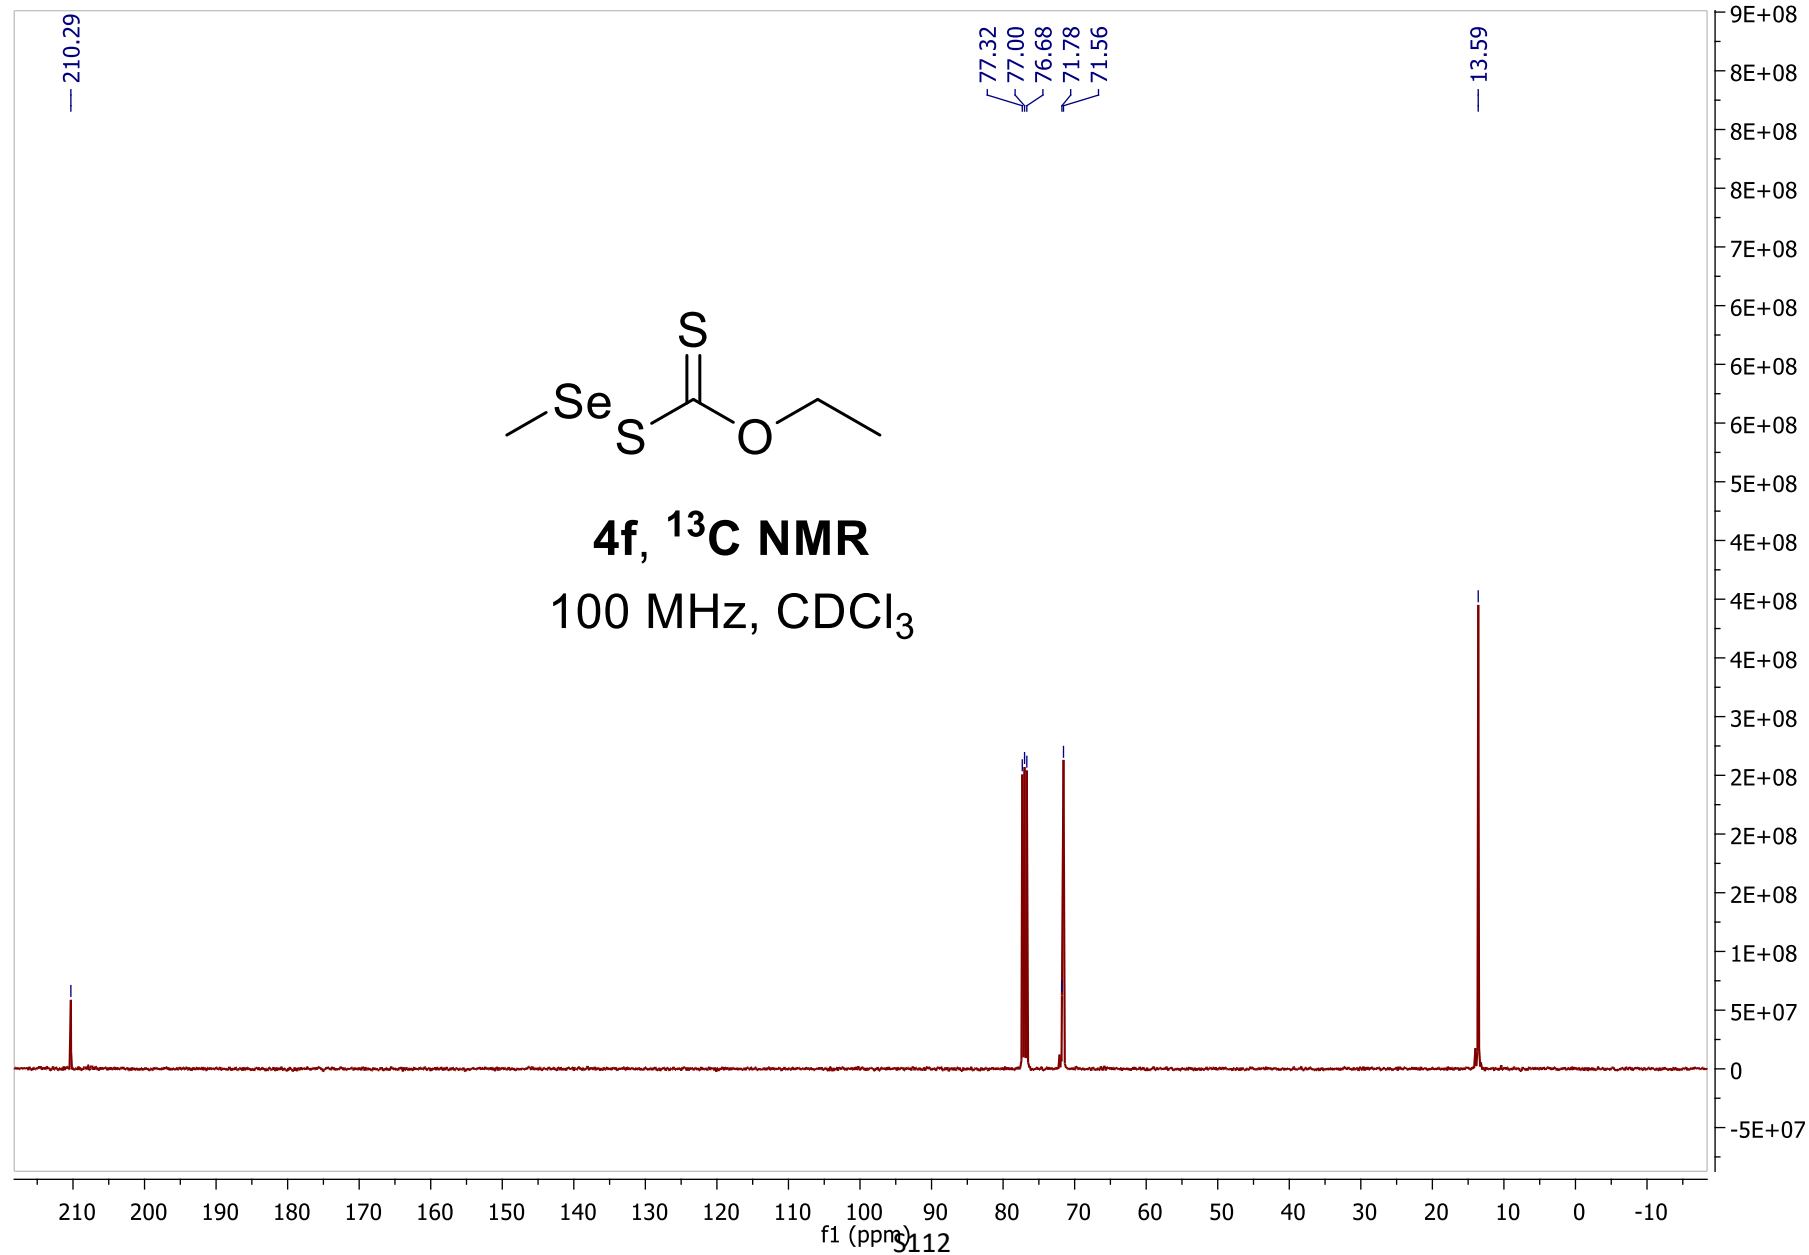



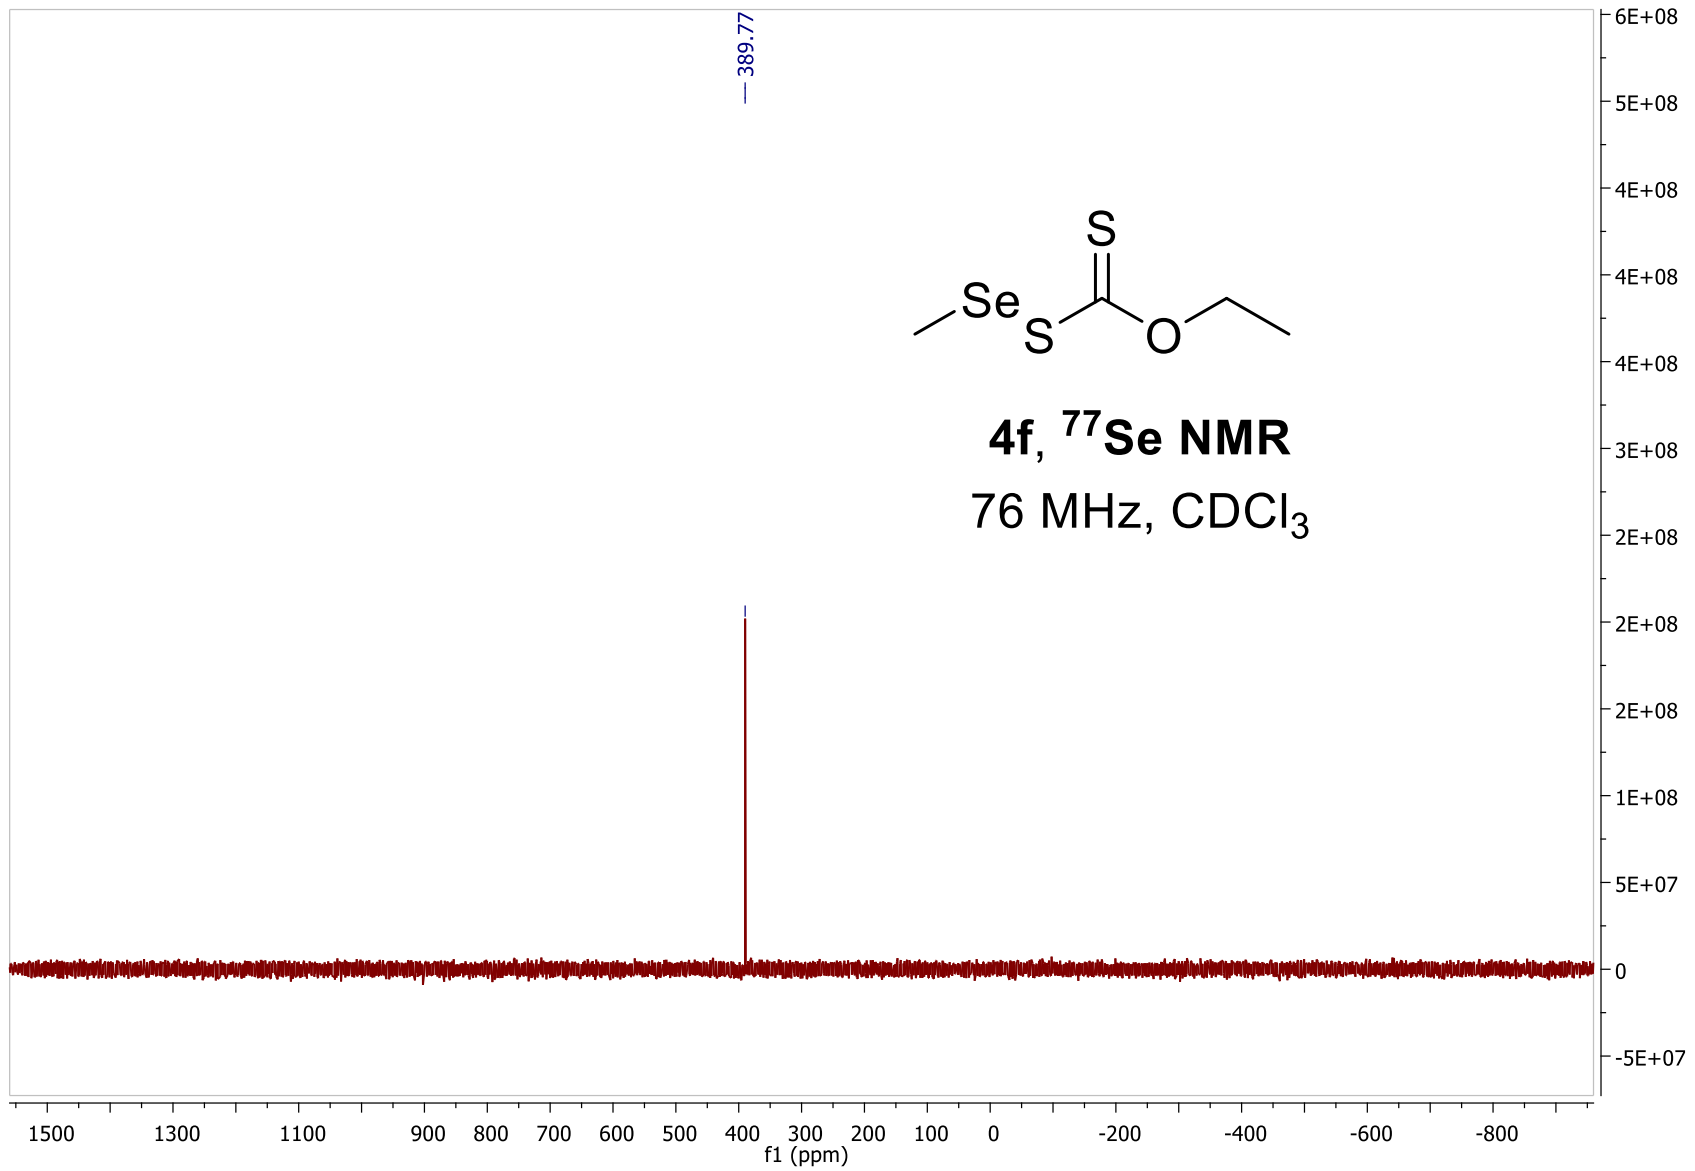

# Spectrum Plot Report

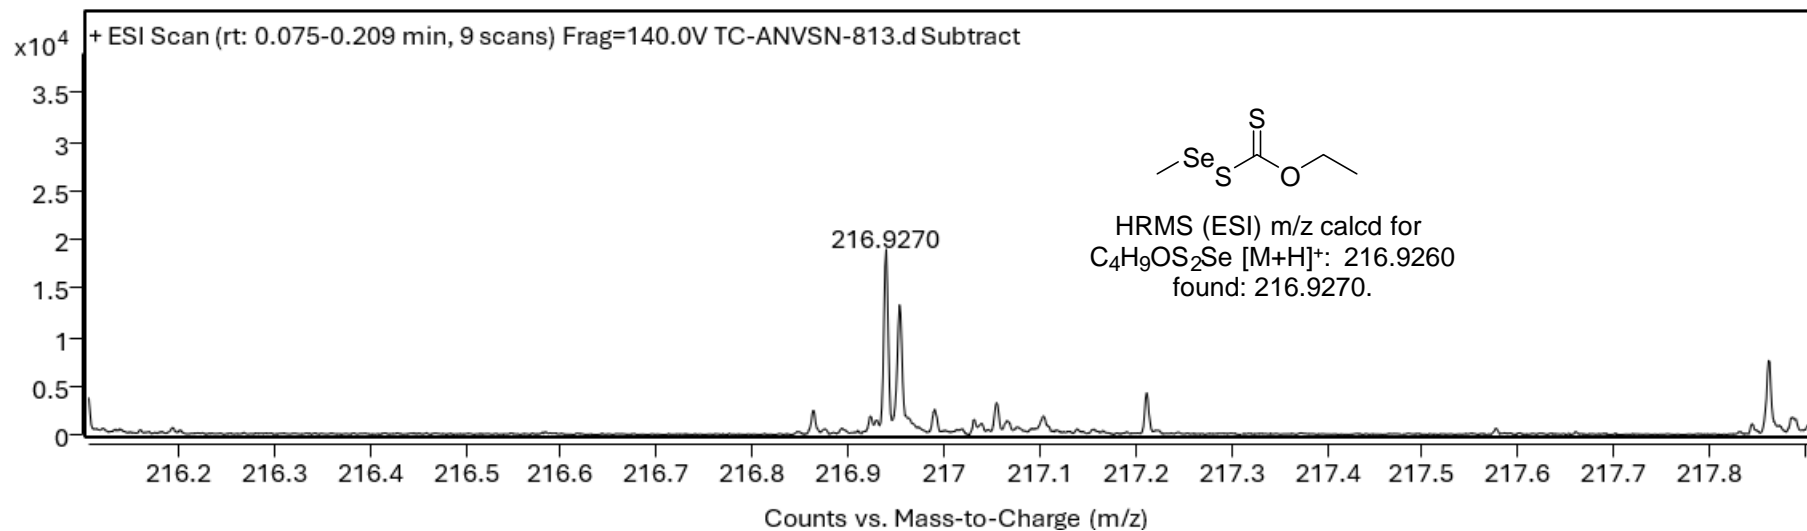

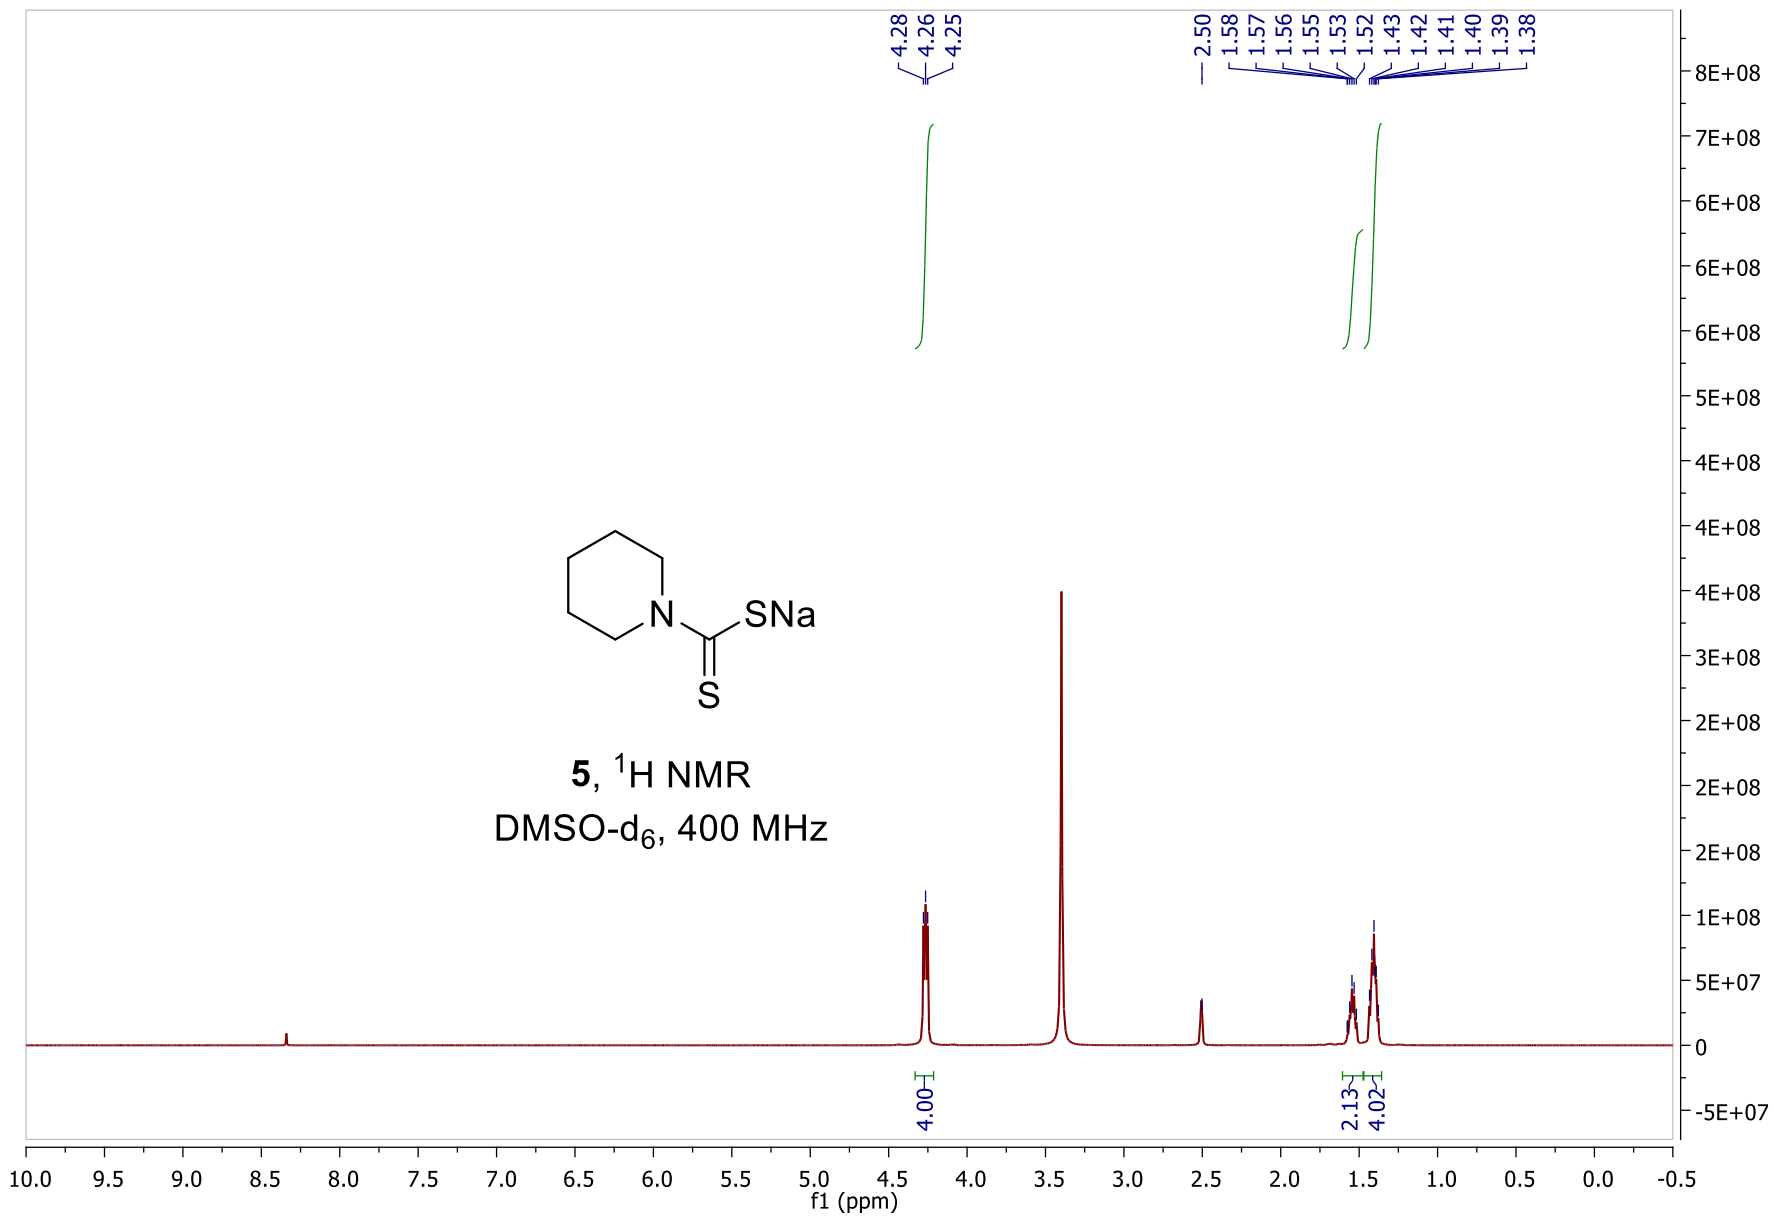

S115

Line#:2 R.Time:----(Scan#:----)

MassPeaks:6

RawMode:Averaged 0.324-1.082(112-372) BasePeak:159.9500(10797484)

BG Mode:Averaged 0.044-0.330(16-114) Segment 1 - Event 2

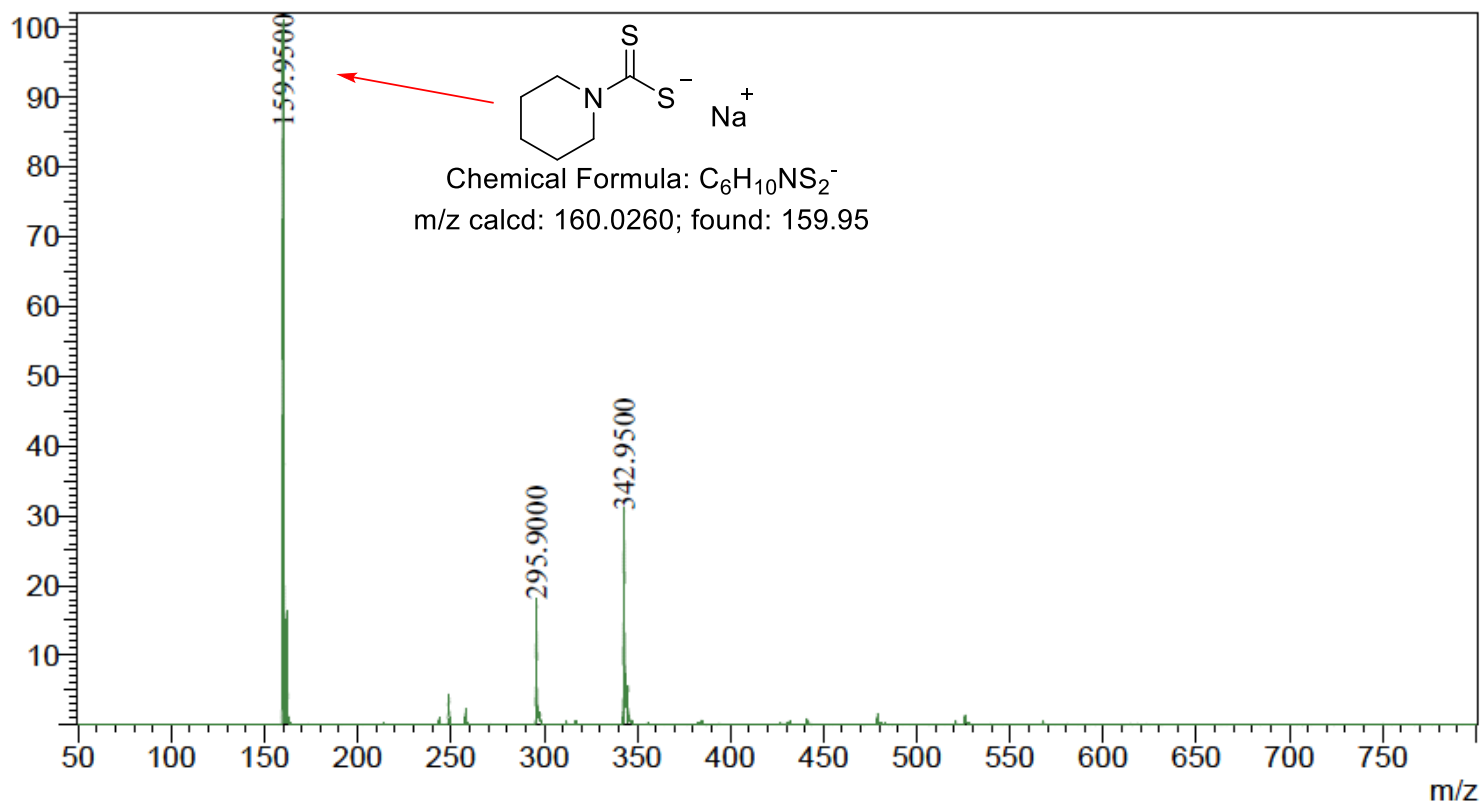

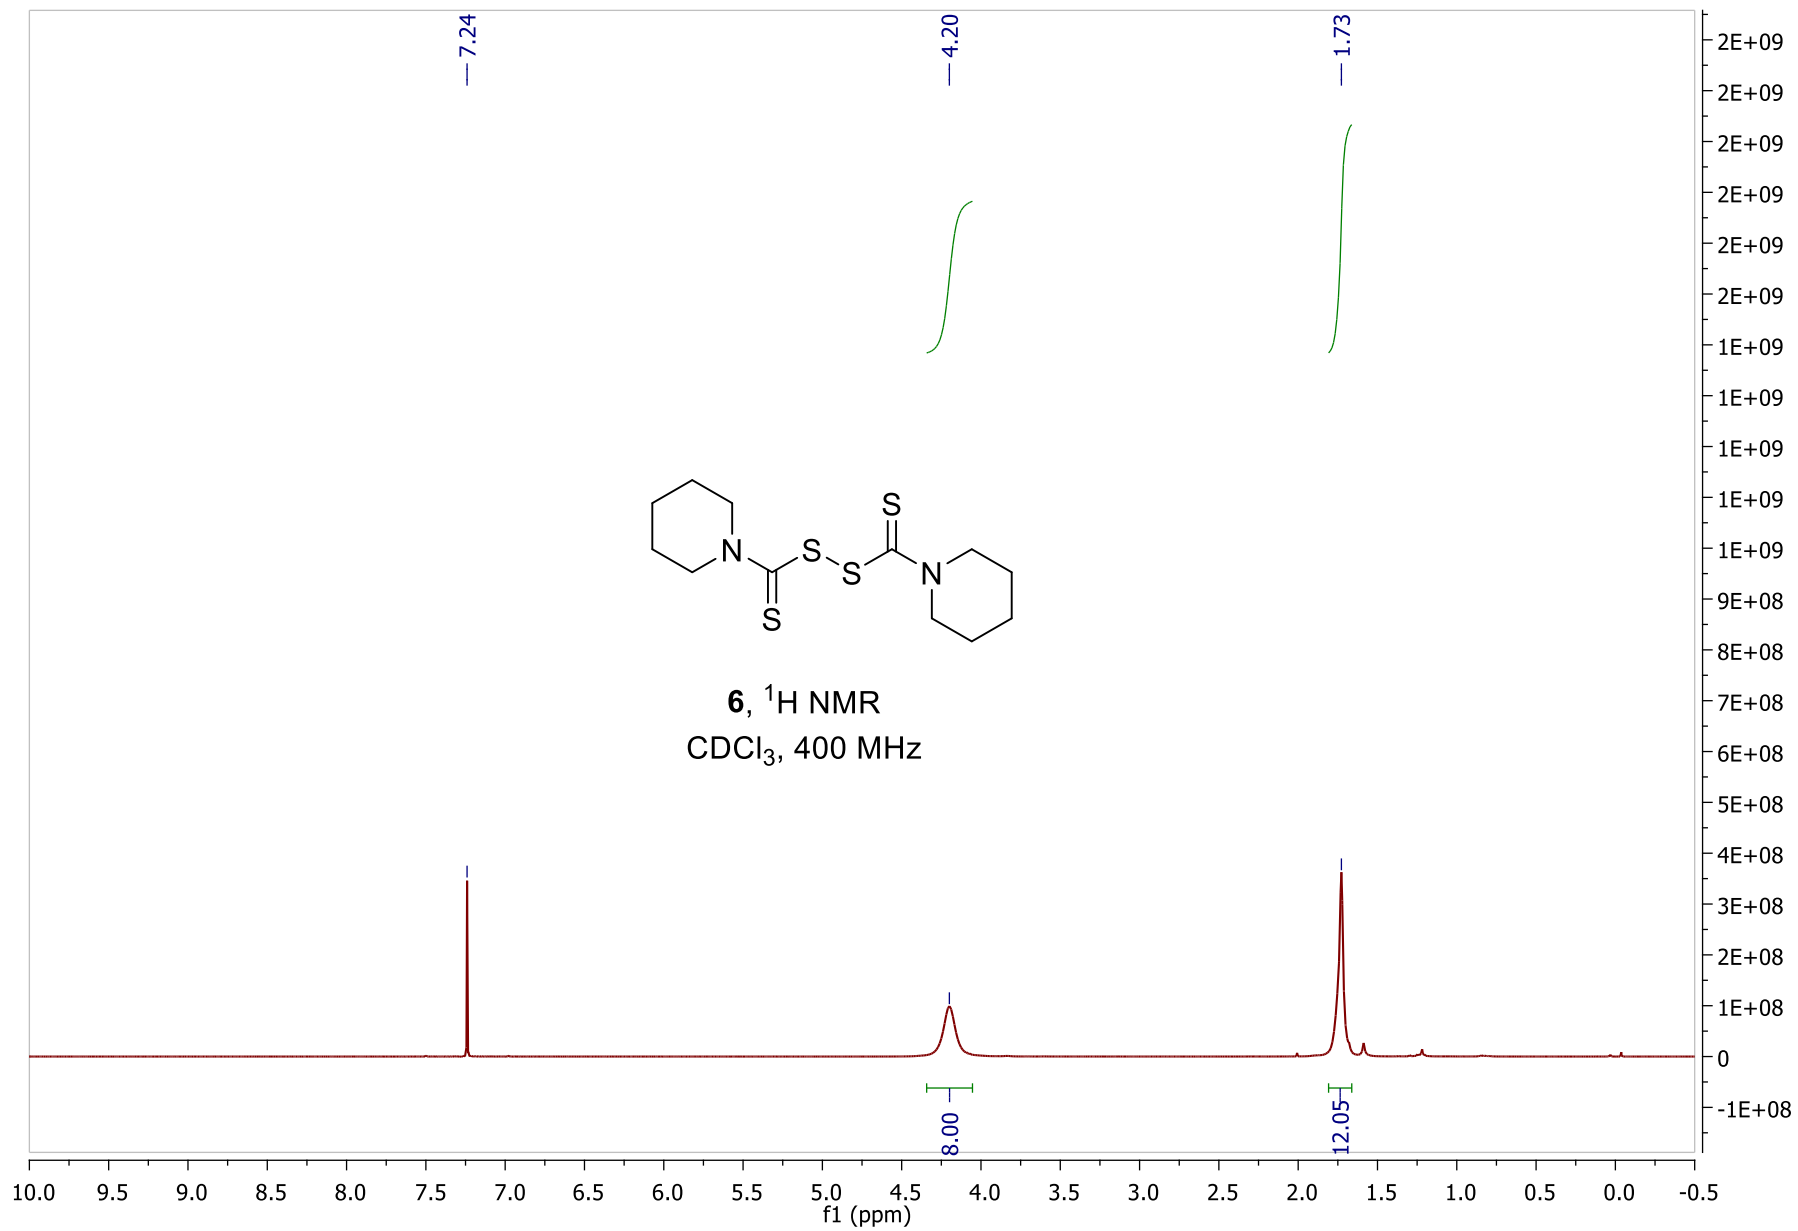

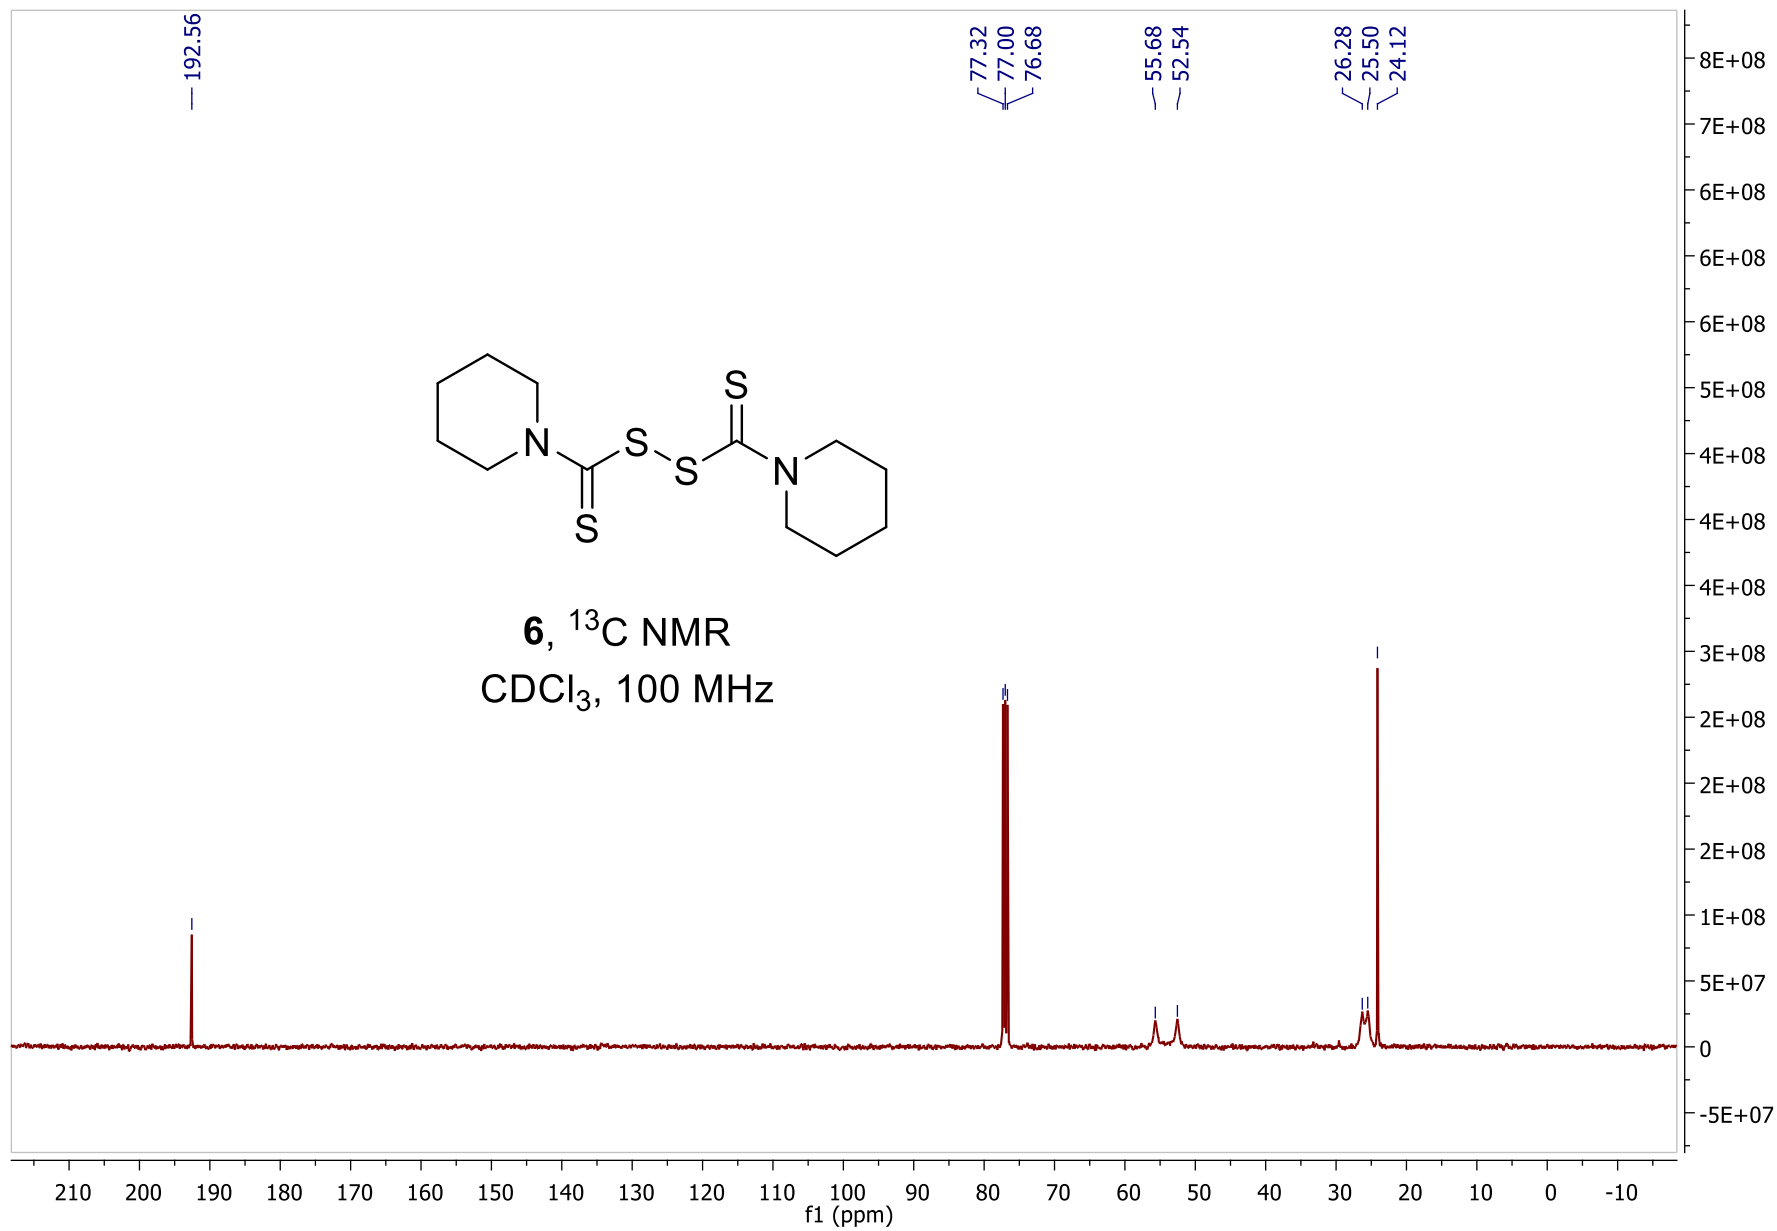

S118

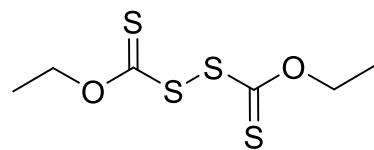

7, <sup>1</sup>H NMR  
CDCl<sub>3</sub>, 400 MHz

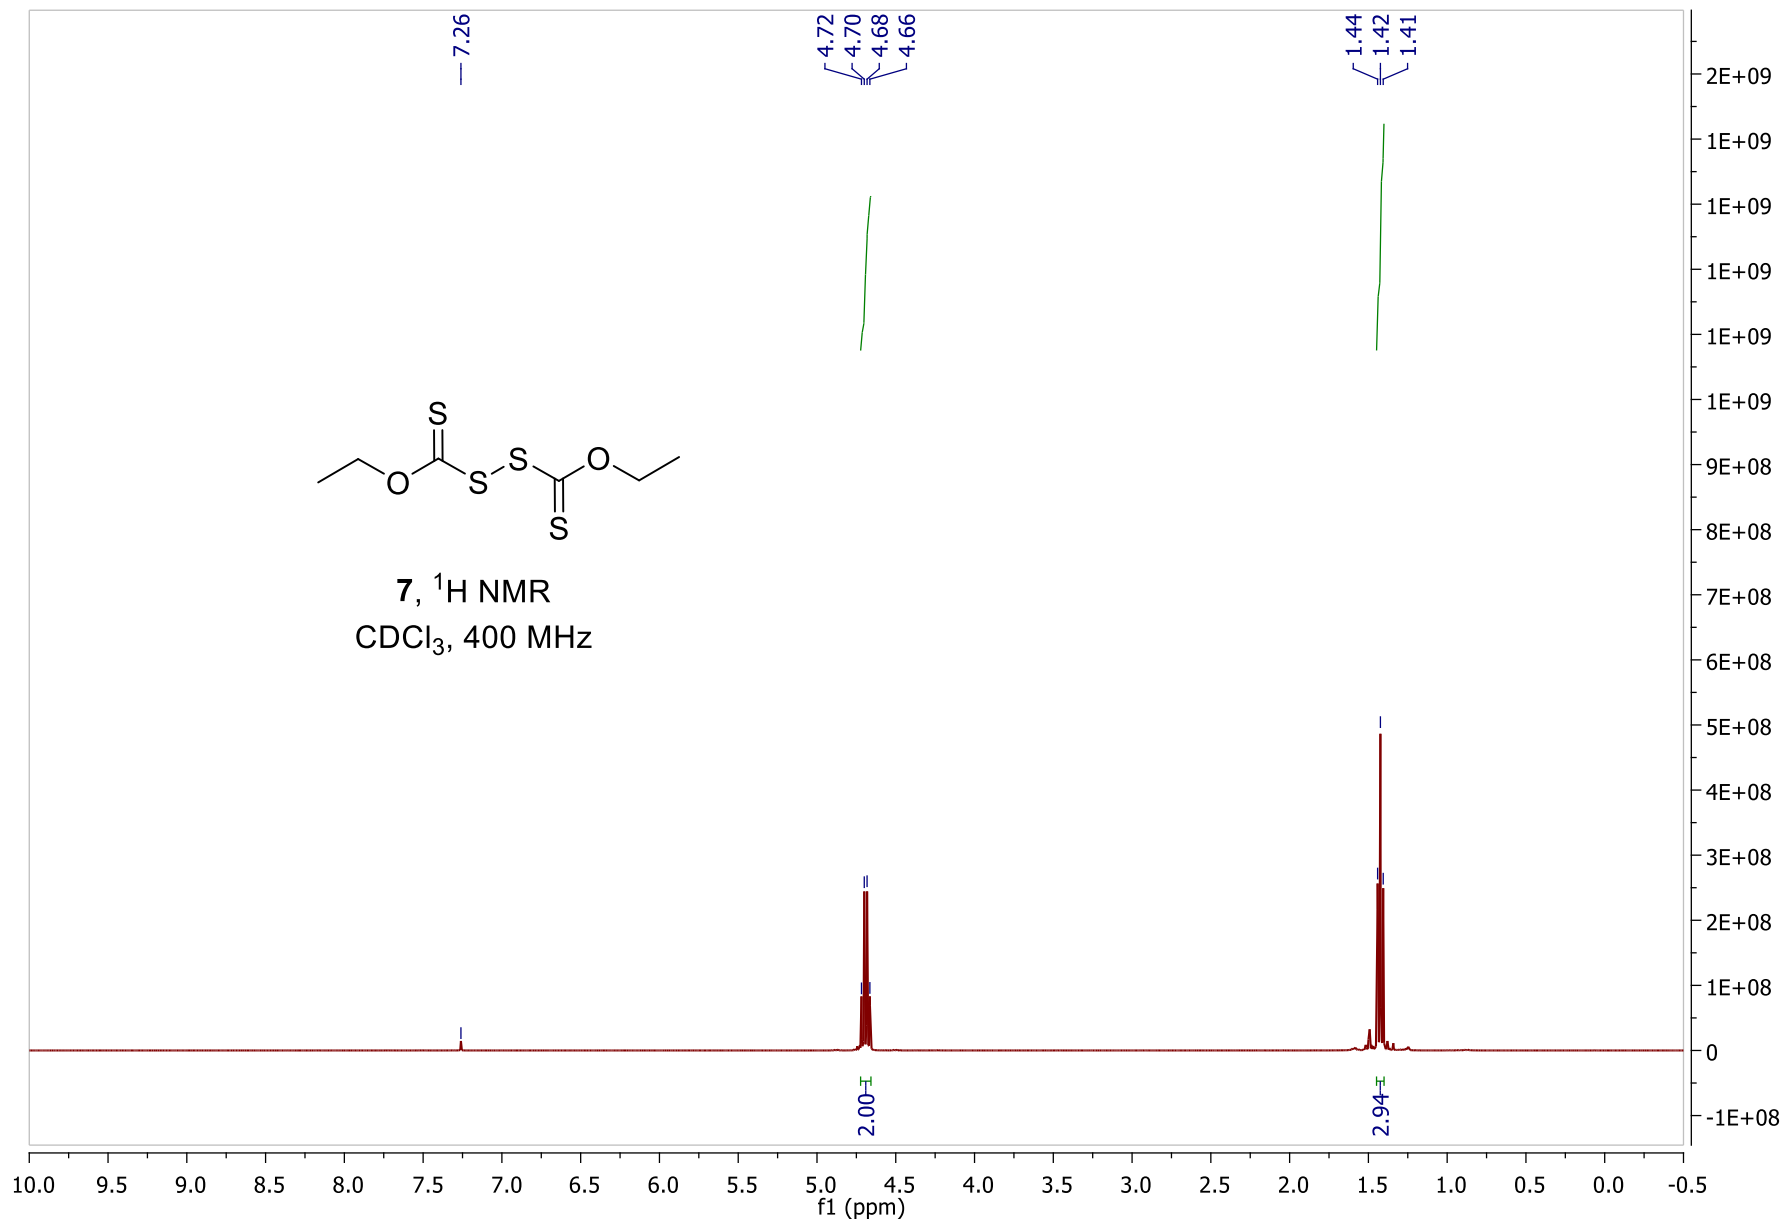

S119

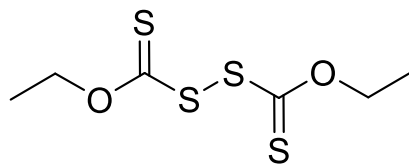

7,  $^{13}\text{C}$  NMR  
 $\text{CDCl}_3$ , 100 MHz

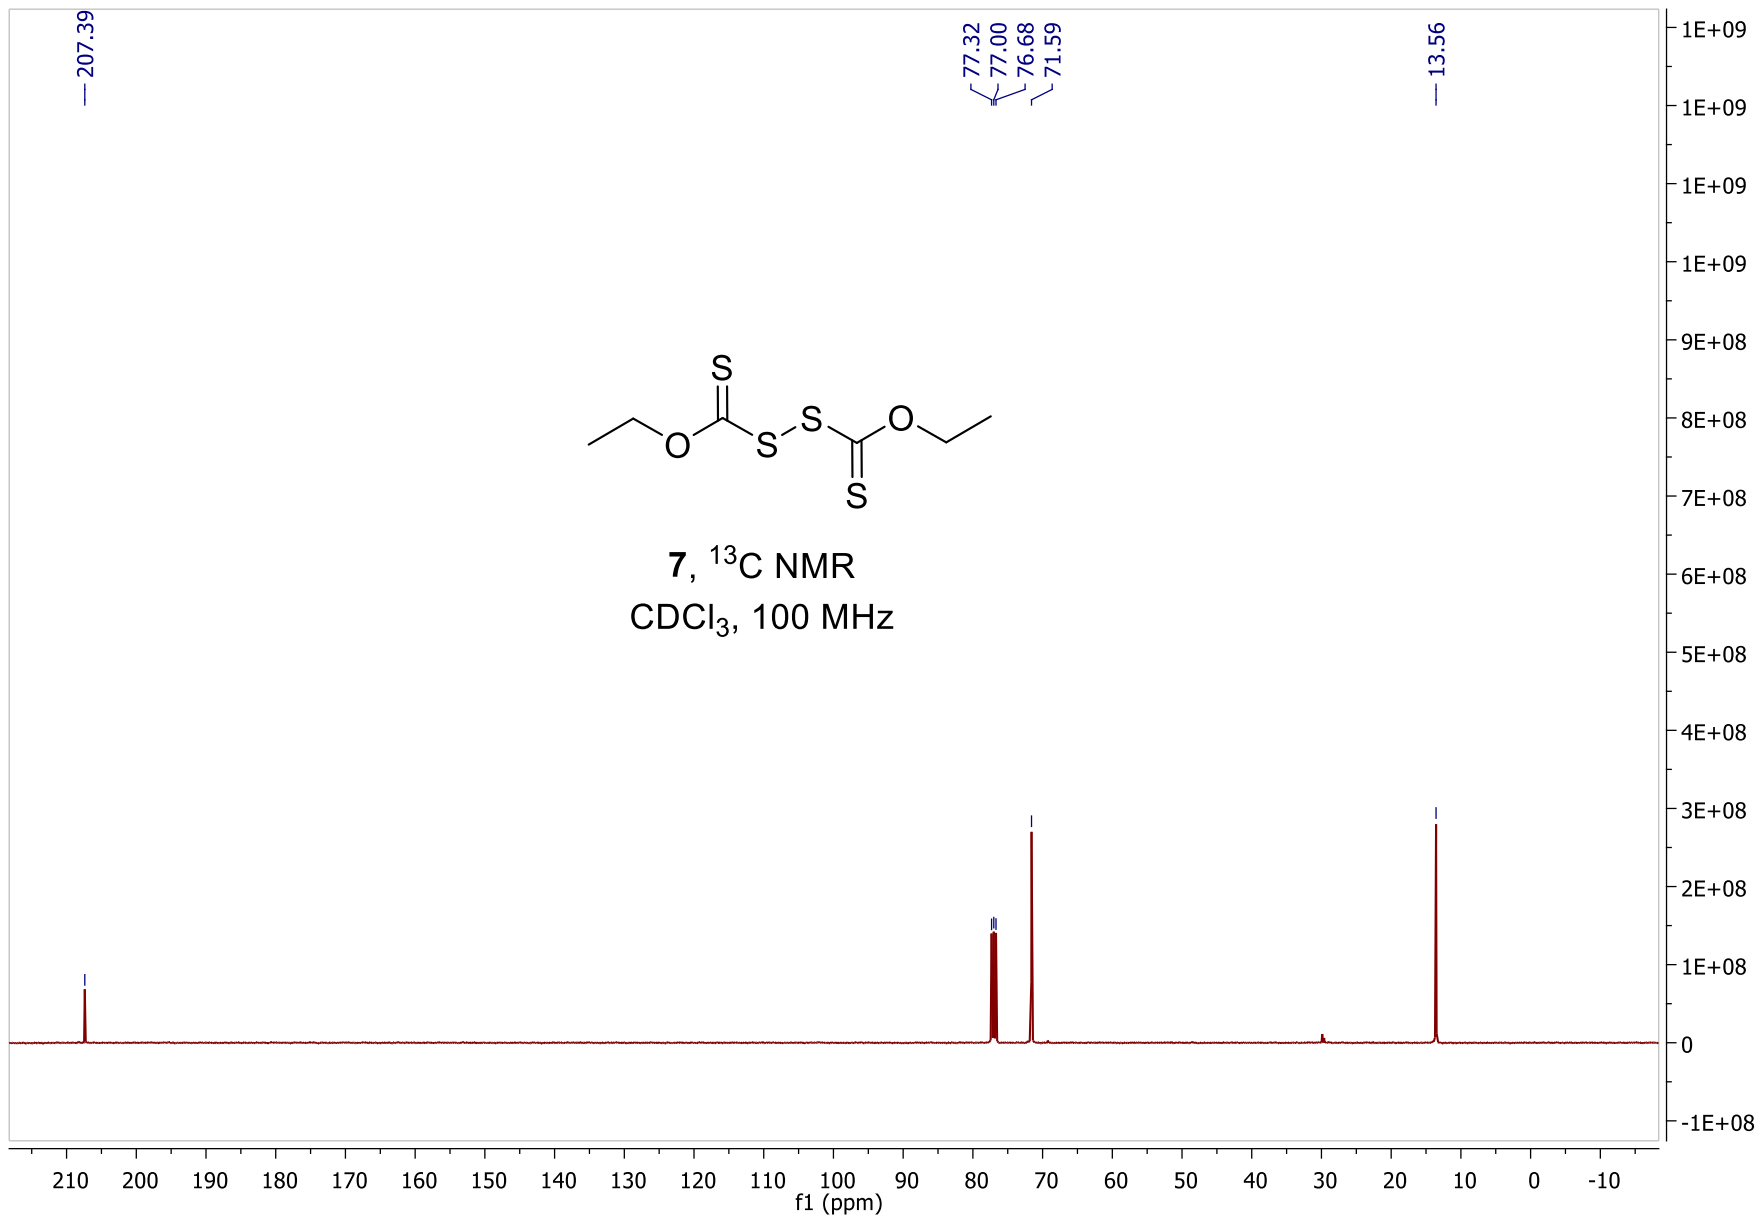

S120
